# Supplementary material for: Receptor tyrosine kinases modulate distinct transcriptional programs by differential usage of intracellular pathways
Source: eLife. 2015 May 7;4:e07186. doi: 10.7554/eLife.07186 (PMC4450512; doi:10.7554/eLife.07186)
Supplement: Supplementary file 1. — FPKM values for all genes across all sequenced conditions. DOI: http://dx.doi.org/10.7554/eLife.07186.014 [file elife07186s001.xlsx]

## Sheet: Sheet1
gene_refseq	Unstim_FPKM	1hrPDGF_FPKM	4hrPDGF_FPKM	1hrFGF_FPKM	4hrFGF_FPKM	1hrPDGF_PD_FPKM	4hrPDGF_PD_FPKM	1hrPDGF_LY_FPKM	4hrPDGF_LY_FPKM	1hrFGF_PD_FPKM	4hrFGF_PD_FPKM	1hrFGF_LY_FPKM	4hrFGF_LY_FPKM
NM_008866	28.8438	32.0978	30.1335	29.8196	31.8225	31.4972	32.6802	37.4559	36.1454	28.3478	29.6426	38.0027	30.6332
NM_001159750,NM_001159751,NM_011541	23.1811	24.4334	22.5864	25.6177	26.5524	25.7853	24.5417	26.2155	23.5058	25.6002	24.7092	28.1612	22.9516
NM_133826	46.729	49.4224	48.6813	51.0086	52.023	51.7764	49.2724	47.3813	39.0523	42.8906	61.5569	50.9292	46.1832
NM_001204371,NM_011011	0.0346765	0.0237784	0.00835212	0.0290035	0.00794248	0.0115381	0	0.0220383	0	0	0.0156344	0.023719	0.0139524
NM_009826	18.8022	20.5194	19.6868	19.6268	21.376	30.6149	29.2124	22.8316	29.8422	34.0572	36.4818	25.5213	24.2359
NM_001195732	1.85938	3.16139	3.0754	3.72837	3.40927	3.03616	2.48858	2.03253	2.38785	3.40139	7.36504	3.03949	0.387742
NM_001244692,NM_001244693,NM_173868,NR_045188,NR_045189	0.00612183	0.011699	0.00423051	0.0162146	0.00449377	0.0278674	0	0	0	0	0	0	0
NM_183028	11.3997	11.8247	11.5745	10.6033	10.9349	13.1501	15.6615	15.5687	16.9892	15.1393	11.7049	14.9835	11.4182
NM_021511	25.0153	26.4668	25.4847	27.2503	42.3861	17.5244	11.9018	10.9337	9.84212	18.2024	20.7159	10.4883	24.2768
NM_175236,NR_027664	0.33054	0.438275	0.223965	0.372505	0.220972	0.265704	0.317635	0.165176	0.161511	0.313411	0.0755869	0.563147	0.151532
NM_178399	0.00806817	0.00402689	0.00844231	0	0	0.0341771	0	0	0.0323927	0.0381687	0.0263281	0.0356438	0
NR_040462	0.308162	0.127349	0.123083	0.300384	0.156244	0.138693	0.0684451	0.252696	0.369455	0.233218	0.0886574	0.0881788	0
NM_001037759,NM_133220,NM_177547	0.981602	1.01751	0.853653	1.00352	0.859142	0.761197	0.86195	0.673279	0.73282	1.00559	0.805037	0.662168	0.566085
NM_177722	0.0197327	0.0281448	0.0304922	0.0273365	0.0171969	0.0655316	0	0	0	0.0274885	0.059774	0.0453063	0.0266821
NM_026493	4.33097	4.25063	4.02134	4.00522	3.9986	4.89817	6.47569	4.38684	7.83619	7.18627	4.21108	6.02984	5.2266
NM_001033636,NM_029525	0.63751	0.644695	0.567127	0.643034	0.69145	1.41943	1.81244	1.27837	0.786217	2.05087	1.11461	0.888903	0.518643
NM_001160369,NM_001160370,NM_001160371,NM_177173	0.719057	0.720404	0.636183	0.770874	0.535672	1.23867	1.37458	1.67023	0.534769	1.22236	0.720775	1.55906	0.369278
NR_045297	0	0	0	0	0	0	0	0	0	0	0	0	0
NM_001198565,NM_001198566,NM_172294	179.612	175.412	173.556	179.499	174.967	122.859	116.01	142.357	139.309	128.752	123.23	141.836	153.087
NM_001011873	0.0512307	0.0131102	0	0.0294659	0.0144398	0.0301809	0	0	0	0.0751146	0	0	0
NM_001098528	0.193317	0.181226	0.133209	0.175505	0.177021	0.110866	0.0769865	0.112828	0.0578899	0.167763	0.0548788	0.0708382	0.0122485
NM_009352	5.93892	6.22141	5.4429	5.3723	5.42023	6.21821	6.63312	4.63835	6.10466	5.54469	4.28592	3.94514	5.43598
NM_133832	9.42507	9.2085	9.44095	8.86445	9.74016	9.60195	8.62379	10.9379	12.1605	8.99519	10.5333	11.2828	12.0498
NR_037998	0.0134154	0.0301716	0.0339105	0.0139832	0.010199	0.0394754	0.0316626	0	0	0.0690645	0.0271582	0.0289427	0
NM_026392,NM_027415	41.9682	43.5196	41.4243	41.8175	44.984	36.6497	36.8781	30.7944	27.6616	35.248	41.6643	33.4107	23.869
NM_001159711,NM_016923	5.29313	5.66097	6.70501	5.62324	8.13534	7.62362	4.60237	5.13062	3.89837	4.6989	5.06995	6.60585	5.29919
NM_010267	0.38489	0.370989	0.336204	0.299006	0.238587	0.246551	0.313674	0.679941	0.240249	0.529291	0.353704	0.581671	0.276682
NM_053191	0.25207	0.24306	0.270443	0.26596	0.201756	0.0990814	0.272572	0.34842	0.169388	0.163481	0.144179	0.237866	0.172174
NM_031402	1.23775	1.1138	1.00293	1.14274	0.811173	0.935117	1.20234	0.757177	0.85083	0.789924	0.5751	1.05004	0.83966
NM_153154	0	0	0	0	0	0	0	0	0	0	0	0	0
NM_001025305,NM_009334	7.96451	7.95698	7.10576	7.22037	5.9723	8.46176	6.94074	11.3268	10.2429	8.94191	4.78717	9.39034	5.17907
NR_045734	0.0379901	0.00483784	0.0154718	0	0.0106549	0	0	0	0	0	0	0	0
NR_029593	0	0	0	0	0	0	0	0	0	0	0	0	0
NR_029902	0	0	0	0	0	0	0	0	0	0	0	0	0
NM_010552	0	0	0	0	0	0	0	0	0	0	0	0	0
NM_028829	6.32835	6.71232	6.29136	6.03983	4.67435	9.04523	7.18502	3.61641	3.47924	8.27098	9.65701	3.10097	3.02909
NM_027974	1.52004	1.14887	1.35643	1.347	1.05671	1.7404	2.02524	2.12826	2.92218	1.34299	1.16657	2.48688	2.49046
NM_029398	7.7201	7.66396	6.97364	6.56313	6.18223	8.94445	9.93601	11.5434	9.9237	7.30058	5.982	12.2776	6.4331
NM_001077353,NM_010356	0.0800602	0.0406577	0.0627957	0.0350588	0	0.0452816	0.0502394	0.0695921	0.0844076	0.255276	0.0686033	0.130593	0
NM_183322	0	0	0	0	0	0	0	0	0	0	0	0	0
NM_001033904	0	0	0	0	0	0	0	0	0	0	0	0	0
NM_001113187	0	0	0	0	0	0	0	0	0	0	0	0	0
NR_029533	0	0	0	0	0	0	0	0	0	0	0	0	0
NR_029717	0	0	0	0	0	0	0	0	0	0	0	0	0
NM_172124	0.23788	0.260964	0.248351	0.2252	0.186184	0.435218	0.721757	0.432265	0.574585	0.640778	0.412968	0.567958	0.205863
NM_007740	0.13436	0.0996715	0.130767	0.108359	0.10501	0.443429	0.0312002	0	0	0.0524986	0.0213044	0.0896724	0
NM_026719	10.503	11.4087	11.0572	11.0886	11.5403	12.5715	11.8337	13.1609	12.8962	11.9841	13.479	13.5507	11.4095
NM_153601	0	0.00620012	0	0	0	0	0	0	0	0	0	0	0
NM_029062	0	0	0	0	0	0	0	0	0	0	0	0	0
NR_015347	0	0	0	0	0	0	0	0	0	0	0	0	0
NM_133235	0.113322	0.0640253	0.0326023	0.0220302	0.0877059	0.133882	0.142374	0.172022	0.135647	0.198237	0.06837	0.352848	0
NR_033199	0.483101	0.47808	0.401756	0.290683	0.51281	0.681412	0.483088	0.117665	0.777813	0.863189	0.749939	0.645262	0.138907
NM_001159729,NM_008999	22.2315	24.5622	22.8711	23.8805	33.1548	32.2044	22.9119	21.062	24.1972	39.2972	54.9809	21.4544	36.253
NM_001276764,NM_010081,NM_133833,NM_134448	12.7903	10.6368	10.3623	11.0475	12.8763	16.7628	15.5257	11.4976	15.0365	19.568	20.6529	12.9563	21.0351
NM_178601	16.9804	16.5621	17.1133	17.7308	19.5212	14.0244	11.6446	15.4198	12.281	13.1463	15.6574	14.217	16.3566
NM_011206	0.039674	0.111032	0.104254	0.0530941	0.0481287	0	0	0	0.0434125	0.0473145	0	0.164469	0
NM_009355	0	0	0	0	0	0	0	0	0	0	0	0	0
NM_007685	0	0	0	0	0	0	0	0	0	0	0	0	0
NM_213727	0.00277884	0	0	0	0	0	0	0	0	0	0	0	0
NM_183019	2.38022	2.0443	2.2505	1.9274	1.77983	2.37667	3.25458	3.3224	1.84723	2.73391	1.40461	2.3524	1.63635
NM_145516,NM_175421	14.3267	15.1835	15.8048	16.046	19.8564	11.9974	12.6949	10.0073	11.4246	12.167	19.8011	10.3733	17.8188
NM_015818	21.8062	18.7991	21.2582	19.6153	15.279	15.5709	18.5428	16.8596	14.6894	15.051	13.3945	13.8087	17.1303
NM_001172205,NM_001172206,NM_145996,NR_033310	2.46437	3.41988	2.31636	5.36908	5.08187	3.8123	2.26548	4.71015	3.69293	7.97334	5.86167	9.90427	9.02974
NM_001277076	0.176624	0.20058	0.170925	0.156101	0.190163	0.0922567	0.152727	0.0811692	0.180644	0.192694	0.142905	0.0661766	0.13804
NM_033570	5.25694	5.47668	4.91208	6.76725	7.61134	3.79206	3.27751	6.83659	5.85569	4.45223	4.87865	8.20582	9.42832
NM_001039551,NM_053186	3.90327	3.78008	3.91711	3.59033	3.50452	3.75059	3.53654	5.72731	8.23948	2.62921	2.29211	4.74354	6.13773
NM_009942	18.181	19.4542	23.4343	22.6707	19.9915	21.2663	17.6293	23.6973	24.2747	21.15	22.9404	24.0374	18.83
NR_040290	0.0687409	0.127828	0.0623809	0.0392503	0.0457424	0	0.178562	0	0	0.124312	0.162327	0.1977	0
NM_009539	0.0396818	0.032722	0.0246049	0.0181419	0.012574	0.129651	0.124367	0	0.0300073	0.0327044	0.0398152	0.075789	0.127106
NM_009918	0.091557	0.0851119	0.0930044	0.0791583	0.0741923	0.0938711	0.0174529	0.0241781	0.0472881	0.0195779	0	0.0549528	0.057086
NM_030266,NM_172971	3.57829	3.71585	3.62394	3.83407	3.12615	5.0895	4.84206	4.34792	7.61489	6.63369	4.67421	4.78649	7.21608
NM_026123	38.9147	38.9706	39.989	39.5982	38.8122	40.9352	38.3856	41.5453	44.7871	37.9096	43.6111	40.0594	40.7667
NM_001037918	4.28822	4.70257	4.34752	3.95701	4.73117	4.97318	4.79555	3.62432	3.15225	3.90113	7.61483	1.94843	2.39835
NM_027098	65.7356	67.5907	67.1342	65.9436	66.7387	56.9148	56.7925	73.2782	72.3151	53.894	60.0049	72.3926	70.2645
NM_198303	20.3071	19.7397	19.6494	17.736	24.4321	20.888	20.3015	21.4198	19.0015	24.54	24.1587	19.2748	25.6278
NM_001011684	0	0	0	0	0	0	0	0	0	0	0	0	0
NM_026850	70.7661	77.561	68.7743	80.1366	76.5672	80.7423	70.0599	56.5377	49.8044	80.1252	99.2482	67.0571	57.5138
NM_008719	0.188916	0.152974	0.145397	0.18776	0.113382	0.283118	0.207745	0.32836	0.160565	0.207902	0.43493	0.235448	0.236281
NM_001252218,NM_001252219,NM_053257	15.1468	16.1302	14.7123	16.4936	16.3575	10.6926	11.4122	16.8116	13.6162	9.48936	9.95439	15.2326	14.0399
NM_028043	12.8465	13.2902	13.2637	13.0617	15.0314	12.1458	11.8508	11.3665	11.7136	11.1058	12.0508	12.161	16.4485
NM_001252200,NM_001252201,NM_001252202,NM_008696	62.9504	62.8372	64.0997	66.0773	74.8384	61.3552	66.9253	61.2512	63.6873	64.3122	74.817	60.6663	86.9372
NM_010555	0.108185	0.0516521	0.0520159	0.118035	0.010464	0.089931	0	0.0871529	0.137448	0.170715	0	0.131871	0
NM_001123382,NM_008362	4.57979	4.27478	4.21529	4.3896	6.85945	5.68035	5.16915	7.41576	6.40874	6.9745	3.68487	8.96294	12.1204
NM_133193	5.65576	5.70387	5.50318	6.1713	8.06064	5.85047	5.38409	5.18004	4.52097	5.69338	3.86704	6.23287	7.75217
NM_001025602,NM_010743	9.5315	10.2427	10.8632	11.5199	42.5128	13.5083	12.2014	7.95427	5.44202	19.9087	48.1427	23.8073	53.4705
NM_001161842,NM_001161843,NM_008365	0.00491231	0.00378006	0.00271701	0.0206215	0.0333418	0.0257539	0.0362965	0.024958	0	0	0.0198375	0.126343	0.0237579
NM_010553	0.418134	0.559151	0.507833	0.577466	2.33021	0.135987	0.0612341	0.435753	0.110986	0.385425	0.268842	0.351294	0.881821
NM_177084	0	0.0041339	0	0	0.0147224	0	0	0	0.0266913	0.0178197	0	0.0293702	0
NM_001033289	0.0375373	0.0510192	0.0471302	0.0463495	0.0953251	0.109771	0.127002	0.114306	0.0179907	0.113037	0.138121	0.0454388	0.152411
NM_001081198	0	0	0.0243192	0	0.013407	0.0585903	0.0649963	0.201707	0.0668971	0	0	0	0
NM_008900	10.7619	10.835	11.9427	10.3403	6.9883	20.4778	21.53	22.2065	17.2386	17.7399	11.7824	17.3788	9.58808
NR_027891	1.40808	1.60341	1.52463	1.41397	1.14022	3.88759	3.86565	4.1473	2.50896	3.91195	2.12208	2.54181	1.6764
NM_023514	19.5965	20.0351	19.3502	19.6683	20.5734	16.4336	15.1805	17.8234	17.2735	15.7996	14.3777	22.5911	18.2461
NM_053107	0.0752876	0.0741778	0.0811522	0.0983103	0.0611809	0.0283411	0.0157199	0.0270072	0.0161796	0.0487568	0	0	0
NM_133818	11.5933	11.0248	11.9289	10.0555	11.4171	9.6757	11.1991	11.8792	15.9362	9.54598	9.69701	10.1302	10.8897
NM_010879	13.2685	13.9633	14.5004	15.4875	13.2695	10.1303	10.1906	10.6426	16.411	10.8212	10.2185	10.5674	17.91
NM_024283	4.81033	3.80899	3.56075	4.86892	2.81505	2.51246	2.66884	3.14408	4.58999	2.10491	1.7717	4.30715	4.44646
NM_009418	28.071	30.134	27.8797	28.5417	35.5614	32.4828	32.035	36.3108	32.8818	34.6034	37.6393	37.159	36.3502
NM_144558	7.16807	6.57694	6.89352	5.86629	6.89932	6.20131	9.7936	6.60503	10.2202	6.2632	6.44774	5.84524	5.50647
NM_011729	20.8887	21.2096	22.4901	20.3354	18.1393	21.8156	25.1519	27.0863	27.125	26.8914	17.7195	24.4061	16.6406
NM_028450	14.503	16.7705	15.6368	16.1289	16.1842	21.5644	19.574	21.8728	20.9258	21.4175	18.4177	21.7224	15.2063
NM_009930	880.497	786.598	760.7	791.422	730.597	1058.45	987.566	1592.57	1268.89	1031.29	1032.34	1426.59	1344.43
NM_028599	22.1956	23.9128	22.3184	23.1437	32.8012	23.5719	20.8526	19.6314	14.1252	25.7274	23.5176	20.7933	24.5206
NM_001160386	0.0690725	0.0553277	0.0521945	0.0714711	0.0481833	0.101442	0.0984747	0.117813	0.104425	0.0546809	0.025174	0.161396	0.0593208
NM_019790	5.65274	5.9733	6.02299	6.33028	5.41814	8.8468	7.79507	10.0594	10.4516	8.63095	7.74483	11.2711	8.224
NM_138741	68.722	72.447	71.243	68.0654	75.2295	71.2078	61.206	70.9463	56.9269	75.0411	50.2878	63.4596	39.9204
NM_011487	0.0188263	0.0210913	0.0306199	0.0545228	0.043165	0.0373451	0.0207141	0	0.0213199	0	0.0252637	0.0921451	0	PDGF 1 hr down
NM_001205313,NM_001205314,NM_009283	7.89612	6.93627	6.1982	6.27334	4.64441	7.92609	7.63042	12.171	8.53855	7.53926	3.33015	11.0203	4.68583
NM_001142647,NR_024590	1.05594	0.985027	0.991433	0.951629	0.770357	0.96603	1.46032	1.02157	1.81939	1.29013	0.425497	1.18545	0.826882
NM_146108	13.7908	14.1536	13.2151	14.1139	12.5327	13.1141	14.5377	16.4411	16.7704	14.6859	12.1693	18.3947	13.958
NM_010834	0.0139916	0.0151375	0.00990758	0.0210904	0.00584661	0	0.178538	0	0	0	0	0	0.0505746
NM_145517	5.40293	5.82853	5.91104	5.4923	5.81453	3.77391	4.81291	3.94133	5.73788	3.4765	4.9461	4.92761	4.40035
NM_028091	2.34715	2.06758	1.90451	1.89783	1.71079	1.98364	2.33663	1.72399	2.4619	2.24491	0.994597	1.5052	1.17749
NM_030025	0.0131142	0.0191566	0.0162665	0.0177496	0.0108956	0	0	0.0495042	0.0492549	0.0357881	0.0435693	0.0709603	0.0260881
NM_001039710,NM_026424	31.2248	37.6456	32.7283	43.2882	46.2991	44.3883	32.3356	34.6799	36.3943	46.7898	43.4606	52.0593	47.678
NM_008303	132.261	127.794	127.161	138.38	134.87	91.7416	75.9596	90.7947	86.5639	81.4481	98.7897	103.229	88.6815
NM_025283	31.8954	34.2757	32.3381	34.474	39.3917	35.3286	37.1186	37.7003	33.7825	36.6052	39.8142	39.1296	37.8602
NM_175439	4.29902	4.11043	4.34843	4.42117	6.8229	3.63099	3.17482	3.50604	4.35023	3.37543	4.64021	4.19065	5.93351
NM_001114663	2.49681	2.49047	2.13109	2.3201	2.37151	3.67073	2.63549	4.44443	6.70808	3.53706	1.96145	4.15188	6.24412
NR_045837	0.0250616	0.0397955	0.0137551	0.00788036	0	0	0	0	0	0	0	0	0
NR_024325,NR_024326	2.9558	3.26391	2.81695	3.04748	2.46905	2.83265	2.67439	4.19606	2.94917	2.2026	2.03794	3.83306	1.99212
NM_028546	3.35746	3.58166	3.773	3.16121	3.96727	2.53615	4.02578	3.21268	3.91199	3.13905	2.87793	2.54777	3.37589
NM_001081181	17.6015	19.063	17.9389	18.9338	18.8544	18.1286	15.3985	15.4298	17.3382	18.4761	20.896	17.899	13.6962
NM_001164566,NM_144882	12.6671	11.4356	10.7557	11.1404	7.83197	16.1898	13.6074	21.3807	14.239	16.7267	11.493	18.9811	8.18471
NM_001177867,NM_199007	3.37367	3.38793	3.02909	2.74556	3.17866	2.04626	2.97934	1.59685	1.99559	2.88087	2.0654	1.24804	2.07702
NM_009676	2.58728	2.41374	2.4822	2.30457	2.10996	4.30909	3.57129	6.95758	3.96061	7.06198	1.54272	7.0428	3.28929
NM_023617	0.0192273	0.0219805	0.0137342	0.0183676	0.0320661	0	0.072794	0.0666509	0.0284566	0	0.0168602	0.0435269	0.0527127
NM_023631	0.109093	0.13009	0.0890054	0.0766445	0.0684991	0.0542928	0.0926044	0.0166875	0.0123981	0.118436	0.0440744	0.0782841	0.013116
NM_001008419	0	0	0.00235037	0	0	0.0113251	0	0	0	0	0.0343144	0.0163295	0
NM_025824	100.649	105.984	101.416	103.92	137.302	107.95	95.6365	103.86	92.1414	106.071	126.652	122.627	135.14
NM_022988	15.0524	15.2897	15.1086	15.1822	18.9768	11.1757	11.8711	10.7027	8.68195	11.0473	11.577	9.0836	10.3815
NM_025597	84.291	81.8702	87.3059	91.591	79.3877	60.6976	57.4374	70.3149	70.2498	58.5337	61.4722	71.9543	69.4694
NR_045007	0.976791	1.13049	1.31145	1.01119	1.67734	1.41963	2.06953	1.25853	0.838925	1.70303	0.821138	1.00007	0.38924
NM_009805,NM_207653	11.2465	11.3951	11.9938	12.1978	18.9596	9.99634	8.47445	13.5823	21.2134	12.7321	10.7862	15.6924	28.5315
NM_001080126,NM_001277926,NM_009812	12.9552	12.3728	12.6191	12.151	16.4016	12.1196	13.2798	9.97769	7.64469	11.028	11.9218	10.1518	12.6839
NM_172656	7.04156	7.3005	7.00989	6.6657	6.00102	6.89887	8.25803	7.2802	11.1929	6.69795	5.88023	7.19668	8.50738
NM_001033373	0.811812	0.85538	0.497565	0.737619	0.405063	1.6992	2.3516	1.4362	0.538597	1.33283	1.39906	1.7713	0.791669
NM_008057	30.6291	30.1776	29.9825	28.0211	27.5479	30.2372	27.5276	28.0773	33.4901	25.5455	32.7249	26.8928	32.6261
NM_001013771	0.0259393	0.0172436	0.0209025	0	0.0115789	0.045844	0.0482092	0.0526086	0.0569669	0	0	0	0.0646406
NM_018868	49.5689	54.0869	47.6065	51.5805	76.9252	51.7432	34.9989	37.1308	26.2917	56.503	54.2591	41.7293	51.8561
NR_028554	0	0	0	0	0	0	0	0	0	0	0	0	0
NR_028521	0	0	0	0	0	0	0	0	0	0	0	0	0
NM_007561	17.3199	16.9356	16.5118	16.128	19.9955	20.649	19.3305	19.9058	22.9917	21.4827	21.6711	18.4032	24.3926
NM_001037725	10.6826	10.926	10.9225	9.97869	12.897	11.629	9.55498	12.1051	12.9659	10.2202	11.1793	9.81884	13.9851
NM_139150	2.57856	2.29922	2.25016	2.16661	2.14278	2.67703	3.38415	2.68989	4.02065	2.92148	1.73951	2.43434	2.35181
NM_173444	4.27778	3.73285	3.80703	3.83297	4.05848	5.17017	5.68346	5.20789	6.74553	6.33709	5.89625	5.39858	6.38768
NM_030013	36.0549	37.5442	36.1568	37.0707	39.3726	35.6843	32.6323	36.5912	30.3261	32.0597	42.5135	35.7885	34.0186
NM_001198570,NM_001198571,NM_198127	4.82045	4.53668	4.5102	4.46758	6.5607	4.25685	4.5497	5.09756	6.08596	4.88975	4.41206	5.44411	8.81292
NM_007642	0.0170945	0.0371857	0.0371404	0.0411552	0.0633838	0.0499481	0.0397254	0	0.023471	0.0156697	0.0551903	0.0181564	0.01521
NM_009843	0	0.00697301	0	0.00692442	0	0	0	0	0	0	0	0	0
NM_017480	0.018046	0.0113171	0.0115666	0.01622	0.00424093	0	0	0	0	0	0	0	0
NR_040483	0	0	0	0	0	0	0	0	0	0	0	0	0
NM_001081050	2.35584	2.2637	2.13667	2.11526	2.06638	2.22939	2.56382	3.31706	2.68729	2.83773	2.17658	2.952	2.66494
NM_001077403,NM_001077404,NM_001077405,NM_001077406,NM_001077407,NM_010939	54.8871	47.7964	45.7997	47.2894	45.4042	40.2961	35.381	65.4578	55.4007	39.4334	35.7192	61.4131	51.4351	JNK targets
NR_045914,NR_045915	0.429527	0.518346	0.471957	0.45195	0.360897	0.679395	1.35741	1.33049	0.937897	1.34189	0.717685	1.04659	0.355878
NM_018796	295.127	290.43	293.978	293.666	296.794	261.138	237.611	328.736	347.788	238.559	266.937	370.72	329.078
NR_028558	93.01	284.756	93.8872	0	237.463	280.623	0	0	162.924	0	216.176	0	0
NM_001267872,NM_028673	1.81028	1.64959	1.51549	1.65046	2.12841	1.24304	1.31697	1.04555	1.16325	1.818	1.73141	1.31709	1.78881
NM_001177600,NM_011780	8.39837	8.18477	8.07947	8.68192	7.67093	9.70462	9.75881	13.2405	12.5113	10.0449	8.82621	11.4236	12.3255
NM_172422	6.92498	7.17979	6.28329	6.84829	7.92175	6.90665	7.00978	4.37728	3.99436	6.91577	6.98448	4.91323	4.9276
NR_027824	0.0928034	0.0846137	0.16695	0.0610769	0.127324	0.0424243	0.0470627	0.0808549	0.0790763	0	0	0	0.0769679
NM_001037726,NM_009952,NM_133828	6.85586	7.07371	6.61581	6.8989	7.81107	9.31461	8.29697	8.31571	8.82925	9.7713	9.36826	8.71794	8.54198
NM_001097644	9.07654	10.3932	9.77761	10.7696	15.2007	9.53031	8.04071	8.03032	7.95017	10.9618	14.2742	12.1051	16.0904
NM_011086	5.07399	4.66928	4.90946	4.36467	5.44201	5.66758	6.21608	6.1427	5.58355	6.56462	5.31525	5.65634	6.48187
NM_139270	0.0366758	0.0598089	0.0462108	0.0326469	0.0580635	0	0	0.125613	0.194812	0.058451	0.138515	0.22654	0.0283681
NM_027010	0	0	0	0	0	0	0	0	0	0	0	0	0
NM_001039934,NM_008632	9.39834	9.73262	8.8372	9.27573	7.18961	17.4274	24.589	18.0771	19.0603	22.2384	15.8632	20.7325	16.4982
NM_175510	0.00331995	0.00370354	0.00466221	0.00369086	0.00924315	0.00762835	0.0165402	0	0.00723008	0.0133462	0.0104962	0.00559297	0.00468534
NM_025683	23.7716	25.6966	24.6445	23.8811	25.6452	23.7094	21.909	28.4585	25.7812	21.9013	21.2664	28.9817	21.0001
NM_001080809	0.0171588	0.0202964	0.0238615	0.0331682	0.0275567	0.0115067	0	0	0	0	0.0155684	0	0
NM_001271533,NM_025728,NM_029160	0.12128	0.103001	0.0674623	0.0772097	0.212936	0.0760314	0.0724424	0.152457	0.067379	0.071722	0.067096	0.106942	0.133811
NM_177164	0	0	0	0	0.00290393	0	0	0	0	0	0	0	0	4 hr PDGF up
NM_026195	49.6418	51.2058	50.5308	53.5594	61.3163	39.092	28.8519	34.9659	26.5337	32.9137	33.5175	34.1868	40.7227
NR_040308	0.0923288	0.0793397	0.0359347	0.0896121	0.0894055	0.0527837	0.166521	0	0	0.347787	0.0799657	0.0761081	0.0637573
NR_027658,NR_027659	0.0829414	0.0215992	0.0848072	0.0275014	0.170418	0	0.101263	0	0.198646	0	0	0	0
NM_175564	0.148108	0.128747	0.133839	0.131261	0.0943259	0.254921	0.178706	0.174632	0.0823874	0.0494387	0.0569702	0	0.108021
NM_009533	12.5693	12.0243	11.3204	11.7294	11.8374	12.2711	10.9758	12.5521	8.09868	10.9756	9.31514	15.2984	8.26667
NM_018817	3.75039	3.65662	3.55442	3.52711	3.33198	3.71047	4.5489	3.95345	3.51214	4.36681	3.60107	3.32055	3.22265
NM_009084	15.3377	16.0298	16.6842	15.5948	16.7726	22.1434	22.6511	34.61	31.4727	25.185	24.0922	30.1897	30.905
NM_008342	795.16	846.303	869.061	905.15	780.696	820.652	934.095	839.693	1214.64	821.151	1117.98	968.084	1181.3
NR_038001,NR_038002	0	0	0	0	0	0	0	0	0	0	0	0	0
NR_040605	0	0	0	0	0	0	0	0	0	0	0	0	0
NM_001034060,NM_001170641	0.0998262	0.0835825	0.123896	0.0656549	0.117191	0.121799	0.14851	0.141193	0	0.115671	0.361914	0.15745	0.149143
NM_009909	0	0	0	0	0.0221966	0	0	0.0280671	0	0	0	0	0.0551943
NM_029711	209.705	218.56	219.56	228.523	266.453	188.753	163.625	193.537	159.533	175.549	215.424	206.723	242.675
NM_174985	0.490457	0.471866	0.597702	0.481277	0.399939	0.461726	0.147755	0.356192	0.152076	0.0828725	0.6523	0.369203	0.442587
NM_001039509,NM_019999,NM_025580	15.555	15.0547	16.3348	16.6942	13.0612	13.2189	13.2324	14.6624	17.1867	12.156	10.9012	16.1632	15.1202
NM_001033345	0.142211	0.170285	0.203647	0.222232	0.155653	0.16429	0.324643	0.240717	0.164603	0.31671	0.27707	0.0956412	0
NM_013612	0.0212132	0.0293047	0.0272465	0.0426617	0.0293127	0	0	0	0.0282267	0.0850603	0.0334481	0.0507047	0
NM_153088	25.5692	24.8937	25.3121	25.4217	22.0916	24.8217	23.2544	23.6848	22.0446	23.6506	23.6895	21.1003	20.9394
NR_029743	0	0	0	0	0	0	0	0	0	0	0	0	0
NM_009509	0.00396523	0.017511	0.00421237	0.00918645	0.00888606	0.035006	0.0280739	0	0	0.0390938	0	0	0.0322894
NM_021383	17.7435	17.984	17.232	16.9731	20.0065	14.5913	13.3737	13.4511	12.1592	14.6394	18.1143	11.5942	13.4326
NM_001081456,NM_148937	0.168579	0.146727	0.133546	0.193176	0.144848	0.244731	0.348318	0.408352	0.108425	0.0707613	0.200582	0.409057	0.0247445
NM_025784	7.01189	6.72571	6.64225	6.94577	5.73488	6.63653	6.4896	6.91743	6.0771	5.82719	6.47147	5.83255	5.27778
NM_175031	2.45471	2.3201	2.41281	2.19898	1.95214	1.97086	3.8653	2.55043	2.93805	2.11258	2.22815	1.71068	2.29531
NM_001014974	5.56781	6.04517	5.75036	6.07533	8.13621	6.05591	6.02986	4.12931	4.6642	7.30041	6.41528	4.44956	7.71484
NM_024264	1.03469	1.01588	1.09332	1.16863	0.66134	1.34517	2.74622	1.89719	1.13423	1.38126	1.10771	1.60836	0.987637
NM_009526	0.0659323	0.0628509	0.0635759	0.0788627	0.0486108	0.0548077	0.0439604	0.0959439	0.167533	0.16525	0.0799271	0	0.0842242
NM_009518	1.85571	1.77199	2.19922	2.03051	3.0089	3.46432	3.78088	1.97826	1.68011	3.02034	5.07164	2.4301	6.41838
NM_009872	0.0270504	0.0312127	0.0389365	0.0497483	0.0209021	0.02075	0	0.150529	0.0473837	0	0	0.0598383	0.0501277
NM_170755	19.014	18.7375	20.6573	19.3361	17.0261	23.2219	20.2772	21.7884	23.7647	18.4549	20.0782	19.4548	24.2426
NM_001159905,NM_001159906,NM_026846	11.6108	11.9211	11.0865	12.4395	10.3848	15.8679	13.4001	13.356	15.0542	15.8414	15.269	13.9391	15.6176
NM_001267620,NM_026187,NR_051998,NR_051999	8.50802	7.80356	10.3266	7.73531	7.09267	9.53027	13.7032	11.5314	12.7223	10.1659	8.56417	10.8575	10.0288
NM_001277992,NM_011494,NR_102731	19.4744	20.1226	19.6652	21.6226	19.6808	19.9491	19.4671	18.6441	17.227	18.9847	19.6809	19.5001	18.4028
NM_001159883,NM_001159884,NM_001159885,NM_020266,NM_178055	22.3591	21.869	23.7227	24.2021	21.4259	29.7587	32.7951	21.0488	18.4399	39.8649	36.4411	22.1438	17.9407
NM_010043	0.774597	0.784509	0.936666	0.917693	1.07974	0.691585	1.36585	0.582744	0.321038	0.989043	3.47387	0.433812	0.597012
NM_001085370,NM_001085371,NM_001173477,NM_007463	30.8004	30.5041	32.8194	31.7006	26.6106	24.9013	33.2116	17.8469	19.6406	27.9703	29.9181	19.462	17.5194
NM_133708	25.408	27.2482	25.5878	25.6153	22.5412	27.2264	34.2467	28.8867	23.0999	28.8626	25.2496	28.3065	16.7789
NM_183022	0.00909991	0.00491468	0.0191072	0.0103537	0.0107768	0	0	0	0.0242171	0	0.0321325	0	0
NM_177056	0.863891	0.853998	1.06183	0.948845	0.754276	1.03633	1.98299	0.691371	1.56001	1.64082	1.50364	1.65403	1.12478	4 hr PDGF down
NM_010564	3.24442	3.78006	3.89676	2.97626	1.94002	5.36299	11.5715	8.1744	7.96807	8.6591	3.77435	8.40394	2.77513
NM_027886	4.17921	4.36086	4.26992	3.74461	3.60257	5.3592	7.02539	4.90799	5.39703	4.97113	4.44124	5.02301	4.33306
NM_009208	5.87394	6.15426	5.69612	5.52802	4.02524	7.46023	14.2982	8.48275	8.71776	13.6188	7.85319	10.1688	4.65299
NR_038012,NR_038013	0	0	0	0	0	0	0	0	0	0	0	0	0
NM_001004173	0.0485561	0.0513884	0.0750405	0.0370916	0.0527652	0.10806	0.0952743	0.0470053	0.16642	0.0170504	0.0805355	0.0477011	0.099323
NM_026713	0.0125791	0	0.0373055	0	0	0	0.0577873	0	0	0.0648233	0	0	0
NM_001001981,NM_001033606,NM_001136222,NM_001136226,NM_028817	29.3629	30.8477	29.7992	31.9255	35.4965	33.5181	32.9631	16.9644	14.4148	42.356	29.9494	20.3121	17.4535
NM_021342	1.73181	1.89757	1.57234	1.39717	0.572938	2.73154	2.80426	0.686384	0.911586	2.23174	1.55767	0.835577	0.4168
NM_001081210	11.0329	11.3712	12.0858	9.28149	12.8157	8.09531	8.8139	7.53723	10.3137	5.51767	9.42165	6.95175	9.65237
NR_040460	0	0	0	0	0	0	0	0	0	0	0	0	0
NM_172849	0	0.00317879	0	0	0	0	0	0	0	0	0	0	0
NM_001122685,NM_029777	22.9278	23.2426	21.4326	23.8989	21.8652	21.137	19.7073	21.8848	20.8788	20.1378	20.4931	23.6673	21.6172
NM_007734	0.421241	0.428705	0.412815	0.444427	0.584184	0.330474	0.367705	0.367359	0.314459	0.411317	0.453558	0.349437	0.349643
NM_029409	47.3781	51.1745	47.6564	48.8851	50.6111	52.3631	51.3303	51.2851	49.4786	50.3479	49.3274	53.8122	41.1371
NM_010472	26.4837	27.8196	26.6305	27.9928	30.7613	26.9602	28.1561	24.9263	30.0849	27.2184	34.1021	23.1018	32.3354
NM_001159738,NM_016960	3.08078	4.52955	3.51414	4.86406	3.98557	2.63511	9.06215	0.471939	0.201441	5.42984	4.21841	1.15927	0.320316
NM_027725,NR_027636	0.0692482	0.0236084	0.0194873	0.0618677	0.0343744	0	0.214686	0.0697189	0	0.158278	0.0687283	0	0.0547972
NR_039588	0	0	0	0	0	0	0	0	0	0	0	0	0
NM_025386	7.25367	6.32747	6.29088	6.17404	6.17815	7.38536	9.03784	9.54065	9.12081	8.07399	8.80109	10.6971	9.88111
NM_001081746	0	0	0	0	0	0	0	0	0	0	0	0	0
NM_001013817	0.0779035	0.103906	0.0325365	0.0670539	0.011714	0.115754	0	0.116839	0.0973176	0.0515345	0	0.0481254	0.0709121
NM_013673	0.036082	0.0230185	0.0404917	0.0390915	0.0193507	0.0788486	0.0838498	0	0	0.0583748	0.0402659	0.0766468	0
NM_133781	32.9224	35.1867	33.4588	35.3268	41.8597	40.607	38.2381	34.2988	37.655	39.2599	45.8529	36.7927	49.2334
NM_022417	188.719	183.628	192.088	196.512	176.375	153.746	140.301	253.827	231.519	129.209	163.609	234.156	228.518
NR_037692	0.0103772	0.0240335	0	0	0.0154516	0	0	0	0	0	0	0	0
NM_001122732,NM_027029,NM_027300,NM_028647	0	0	0	0	0	0	0	0	0	0	0	0	0
NM_001144992,NM_001144993	0	0	0.015422	0.00386835	0.00379479	0	0.0445558	0.0254859	0	0	0	0	0
NM_027357	61.9797	63.6221	64.0473	65.352	68.4695	68.144	64.7792	66.133	47.291	67.0829	79.0681	64.6814	55.8928
NM_027456,NM_030184	6.68953	6.62926	6.45122	6.32979	5.83535	7.03898	10.4859	7.79087	6.91184	8.16257	6.67313	7.80918	5.56308
NM_145222	0.192266	0.0866431	0.108508	0.0845486	0.106261	0.1519	0.120363	0.0827145	0.0495531	0.101667	0.120954	0.0312889	0.0393691
NR_015507	0.42336	0.42925	0.439541	0.416055	0.436131	0.586162	0.427416	0.637186	0.738206	0.276891	0.21529	0.171572	0.593556
NM_027966	0	0	0	0	0	0	0	0	0	0	0	0	0
NM_008972	72.8296	77.5761	80.3125	77.3261	82.5163	62.0343	58.9379	57.5389	60.4188	58.5799	62.9861	72.4164	58.5905
NM_172974	17.269	17.4028	18.146	17.6572	17.222	17.6769	17.7568	16.9214	16.2367	17.2489	16.8281	14.7995	14.9865
NM_001172157,NM_153530	2.6315	2.6738	2.58708	2.48384	2.38102	2.25451	2.72359	3.49225	3.27413	2.64693	2.23452	3.07099	2.68868
NM_007432	0	0	0	0	0	0	0	0	0	0	0	0	0
NM_027084	0.221731	0.149843	0.197855	0.266613	0.282993	0	0.18264	0	0.107909	0.180106	0.25374	0.0417375	0.0874803
NM_021600	0.0370769	0.00815829	0.0265892	0.0411127	0.0926991	0.0187812	0	0.0357944	0	0	0	0	0
NM_009604	0.058905	0.0866684	0.0693632	0.0930985	0.0160091	0	0.0671577	0	0.0345609	0.0376673	0.0868111	0	0
NM_001039169,NM_001039170,NM_023314	54.3121	54.8702	56.0396	58.938	62.441	56.8657	46.2575	50.0505	48.9856	53.7413	66.4175	53.4656	54.9485
NM_028889	0.237734	0.135311	0.29298	0.211068	0.262294	0.0324766	0.0720549	0.0618961	0.0976156	0.242484	0.411246	0.25392	0.176606
NM_001110212,NM_146112	16.79	15.5496	16.5927	14.3525	17.1804	17.3477	18.378	19.0875	21.5162	16.6537	17.7227	16.6902	22.6272
NM_028473	0	0	0	0	0	0	0	0	0	0	0	0	0
NM_001160163,NM_001160164,NM_001160165,NM_015750	0	0	0	0.00868102	0	0	0	0	0	0	0	0	0
NM_001110192,NM_001110193,NM_010566	0.0483785	0.060995	0.0574033	0.0782922	0.0414962	0.0447627	0.0601755	0	0.0424254	0	0.0498775	0.0233403	0.0137443
NM_001205391,NM_001205392,NM_029846	13.2729	13.7912	14.3876	13.7822	15.592	15.0979	15.3694	13.9762	14.3883	14.5354	15.0908	13.5623	20.2173
NR_028519	0.239004	0	0.515493	0.250856	1.3275	1.07283	0	5.73943	1.22494	2.35629	4.52836	2.20042	0
NM_009118	0.0832055	0.046728	0.120235	0.0912334	0.0798284	0.10192	0.162576	0.105596	0.0392264	0	0.0985302	0.169537	0.103827
NM_177646	17.6733	17.7665	16.9784	17.8348	16.7925	14.5916	13.1045	21.3091	19.6291	15.0747	12.0681	20.0957	18.7117
NM_013701,NM_145079,NM_201410,NM_201641,NM_201642,NM_201643,NM_201644,NM_201645	1.98286	1.77663	1.82734	1.72337	1.78961	3.78324	2.66469	5.19358	3.25099	3.29831	2.46224	5.5315	2.71599
NM_001177364	0	0	0.00192381	0.00918497	0.00203734	0	0	0	0	0.0170116	0	0	0
NM_134252	0	0	0	0.00367288	0.00397493	0	0	0	0	0	0	0	0
NM_029269	0	0	0	0	0	0	0	0	0	0	0	0	0
NR_037971	0	0.00619419	0.00521168	0.0215481	0.0679675	0	0	0	0	0	0	0	0.0259174
NR_040493	0	0	0	0	0.0551198	0	0	0	0	0	0	0	0
NR_040471	0	0	0	0	0	0	0	0	0	0	0	0	0
NM_133816	30.4685	32.5577	30.7651	33.2056	31.6017	15.6679	10.9352	14.2724	20.1142	15.7072	14.7487	11.4614	18.0808
NM_001037136,NM_178119	8.93183	8.49727	7.8889	8.90793	8.46805	8.42963	5.82462	8.34063	6.59689	8.27048	5.31246	7.99761	6.19378
NM_001271607,NM_007722	40.9652	39.1846	41.4602	46.5676	33.1943	36.4281	51.4237	24.9151	27.4845	40.0127	65.927	27.9291	25.6217
NM_133805	47.2463	50.0555	50.5109	51.8702	53.0912	48.5072	41.1143	56.1937	39.4994	45.6985	54.4641	50.7949	48.7108
NM_053015	0.110641	0.0973172	0.103	0.072915	0.0762574	0.0596902	0.0515942	0.0461205	0.022553	0.0797233	0	0.0918958	0.0439033
NM_001101647	0	0	0	0	0	0	0	0	0	0	0	0	0
NM_001111311,NM_001111312,NM_008515	82.1276	91.9285	88.6683	94.5805	133.636	82.5617	71.2227	57.5324	50.1273	88.7689	114.878	59.1906	106.328
NM_001033408	0.0124242	0.0172517	0.0255055	0.013472	0.0202204	0	0	0.0218313	0	0.0176776	0	0	0
NM_001168392,NM_016894,NM_178401	3.35441	2.95028	3.32184	3.23273	2.82365	5.35444	5.5668	2.33641	2.16206	3.82427	4.78474	2.03996	1.9489
NM_026454	18.6832	19.5021	20.1672	20.8843	24.2743	23.5338	19.9319	14.5479	13.9252	24.5171	28.9843	17.3944	21.3628
NM_016717	5.23472	5.18706	5.4255	5.67743	4.64396	5.46064	5.79606	4.15341	2.95325	4.53587	5.65643	3.85224	2.9618
NM_001033292	0.0224986	0.0205869	0.0218451	0.0236617	0.011923	0.0586342	0.0375139	0.0188344	0.0635538	0.0340022	0	0.0202688	0
NM_027551	2.80211	3.20198	3.42061	3.21419	2.06835	1.8824	1.76785	0.76859	0.666287	2.28475	2.57863	0.780013	0.300475
NM_173395	8.1001	8.65103	7.5257	8.76401	7.57345	3.67355	4.03783	3.22018	3.01828	3.80402	4.65565	3.1514	3.01264
NM_028718	4.17525	4.03197	3.96272	3.97909	4.51841	4.30127	4.30069	2.91044	4.79083	4.42113	3.01616	3.76422	4.90286
NM_001039126,NM_023046	7.23521	6.7948	6.87894	7.5346	6.54201	7.20241	7.24616	6.72807	8.09328	6.57219	8.85676	6.94231	6.10461
NM_007855	5.51077	5.81893	5.81905	5.40771	8.30255	2.60718	2.7597	3.61366	2.30828	2.75274	2.50078	4.57113	8.64711
NM_147037	0	0	0	0	0	0	0	0	0	0	0	0	0
NM_146277	0	0	0	0	0	0	0	0	0	0	0	0	0
NM_146490	0	0	0	0	0	0	0	0	0	0	0	0	0
NM_146491	0	0.0158607	0	0.0159666	0	0.0684491	0	0	0	0	0	0	0
NM_206896	0	0	0	0.0147026	0	0	0	0	0	0	0	0	0
NM_016696	43.7475	43.2892	47.0209	47.1789	39.3082	63.6566	67.5558	39.6182	38.4272	62.2465	79.916	39.3524	45.3973
NR_029559	0	0	0	0	0	0	0	0	0	0	0	0	0
NM_175118	2.41187	2.08106	2.06332	2.01274	1.65808	1.76555	1.86009	1.73628	2.34953	1.39224	1.22178	2.30412	1.9566
NM_181405	15.4731	15.2186	17.1832	16.0116	14.7781	13.3418	14.1767	12.3644	14.1931	12.5892	14.2524	9.77328	13.2195
NM_011796	11.3667	11.7719	11.9187	12.4105	10.713	12.4293	13.3393	7.58369	9.39384	12.4457	12.3641	7.95592	8.61284
NM_001104529,NM_001271766,NM_022320	0.106668	0.107066	0.11608	0.132337	0.10243	0.0550406	0.0591702	0.0264453	0.0258634	0.0172633	0.0796008	0.0200047	0.0233227
NM_001159658,NM_177587	0	0	0	0	0.0147844	0.0592291	0	0	0	0	0	0	0
NM_001276710	0	0	0	0	0	0	0	0	0	0	0	0	0
NM_172463	0.263582	0.219634	0.284098	0.228506	0.281497	0.421647	0.712661	0.328812	0.27411	0.554021	0.243478	0.46327	0.373996
NM_023200	13.1056	13.6235	13.4931	13.1264	13.8778	13.5711	12.398	13.9213	11.5413	13.058	14.6309	12.0756	12.0764
NM_001271884,NM_207031	0.0905156	0.0877763	0.129195	0.0793974	0.0685101	0.0140154	0.18589	0.214523	0.0893376	0.0348894	0.0379342	0.0404271	0.140103
NM_001159717,NM_001159718,NM_001159719,NM_010891	172.27	175.481	171.775	171.151	188.473	186.099	187.87	182.495	160.939	177.7	206.25	193.399	168.803
NM_145519	5.79472	5.53251	5.18845	5.39353	4.83423	7.53911	7.3683	5.59783	6.20595	9.26357	7.80938	6.26356	5.16641
NM_016778	17.2026	17.9542	17.5746	20.0462	14.5593	20.3663	18.9422	9.36046	7.12305	19.4783	31.4149	9.03496	5.43493
NM_174874	20.1098	19.422	19.215	20.4992	19.6926	18.439	19.5721	20.1884	21.476	17.613	21.6419	19.0713	21.7104
NM_025454	4.14693	4.77564	4.09751	5.20293	5.65637	4.09471	3.60352	4.28387	3.71952	6.8865	4.1768	6.56308	6.43323
NM_178882	2.77277	2.79386	2.52384	2.7668	2.05162	2.21937	2.15265	2.74068	2.85433	2.03076	1.53952	2.45375	2.00869
NM_199366	0.123072	0.162373	0.117141	0.107617	0.108204	0.0588912	0.13066	0	0	0.140827	0.248576	0	0.0356143
NM_001205249	0	0	0	0	0	0	0	0	0	0	0	0	0
NM_001039219	0	0	0	0	0	0	0.0211956	0	0	0	0	0	0
NM_173772	0	0	0	0	0	0	0	0	0	0	0	0	0
NR_040473	0	0	0	0	0	0	0	0	0	0	0	0	0
NM_026321	11.9018	12.6244	12.908	12.7312	12.0079	10.2072	10.7374	13.2005	15.9726	9.99055	11.5293	14.8927	13.1631
NM_026250	1.42383	1.6656	1.48906	1.53931	1.32171	2.37556	1.94763	1.45872	1.22235	1.90266	1.15842	0.725932	1.55545
NR_040439	0.0084708	0.0101267	0.00852039	0.0172347	0.00802695	0	0.038914	0	0	0	0.047461	0	0
NM_001164233,NM_027584	0	0	0	0	0	0	0	0	0	0	0	0	0
NM_172851	0.0160976	0.0246724	0.00985928	0.0294725	0.0106082	0.0414208	0.0116824	0.0401413	0	0.0131048	0.0319082	0	0.0318261
NR_037989	0	0	0	0	0	0	0	0	0	0	0	0	0
NM_011800	0.0294554	0.016168	0.0483031	0.0144722	0.0268694	0	0.0163383	0	0.0168162	0.0506749	0	0.0302075	0
NM_029349,NM_173187	10.7758	11.1846	10.421	10.8351	11.5211	12.3698	12.2541	11.9711	12.5326	12.9754	12.1736	11.6165	13.0411
NM_009399	4.30655	5.18483	4.13612	4.76469	4.38543	4.65244	2.49515	3.31481	2.8756	4.28237	3.5023	2.66339	2.03221
NM_001122675,NM_001122676	6.42203	6.31853	6.29591	6.90872	7.83791	6.88461	6.01262	5.51013	6.23052	6.7552	6.84075	6.6141	7.03351
NM_133821	4.03647	3.98109	3.60917	3.96064	4.51415	3.81179	3.20628	3.9327	4.04084	3.17721	4.07209	3.39233	5.18921
NM_009257	0.0298349	0.0197067	0.0196604	0.0254235	0.0216812	0.0871741	0.128378	0.0756593	0	0	0	0	0
NM_001199213,NM_027971	0	0.00745178	0.00763073	0.00948853	0	0.0723166	0.0969187	0.0700827	0.110523	0	0	0	0.0667131
NM_172852	0	0	0	0	0	0	0	0	0	0	0	0	0
NM_025867	0	0	0	0	0	0	0	0	0	0	0	0	0
NM_027548	0.487633	0.400143	0.531575	0.522722	0.531802	1.43817	0.86029	2.01253	1.1212	0.981189	0.762161	1.30143	0.709247
NM_001174170,NM_011111	0.0650356	0.0756196	0.062155	0.16835	3.21985	0.0587474	0.144106	0.383008	0.0335215	0.172759	0.123989	0.470832	5.63212
NM_001160307,NM_198028	0.0731924	0.104083	0.0516765	0.0610409	0.0678677	0.0473135	0.111606	0.127007	0.139105	0.0414766	0.0464391	0.181923	0.0603913
NM_001159748,NM_011459	4.07819	3.49447	3.95031	3.59582	4.77063	5.83356	5.96793	6.42733	3.02282	4.25103	8.19781	6.06673	4.15504
NR_102306,NR_102307	0	0	0	0	0	0	0	0	0	0	0	0	0
NM_172853	0	0	0.00399791	0	0	0	0	0	0	0	0	0	0
NM_001077425	0.0218308	0.0266419	0.0101724	0.0193173	0.0253442	0	0.0154863	0	0	0	0.0211489	0.0402574	0
NM_026472	23.7369	25.0918	22.8975	24.5055	39.9677	21.9748	13.2436	18.5879	14.1469	16.9896	21.6674	19.9922	31.3027
NM_001081276,NM_029709,NM_177548	15.546	14.8933	15.1179	14.843	15.3429	14.1229	15.6903	13.0502	15.1301	14.426	20.6353	12.0942	16.8117
NM_023755	0.283251	0.260651	0.23968	0.245319	0.271561	0.288666	0.401482	0.172551	0.231824	0.256846	0.260859	0.187567	0.293126
NM_146103	8.28561	8.08678	8.24529	8.72164	11.0489	6.63936	5.98663	6.84915	7.20158	6.30381	7.65232	6.97693	11.5538
NM_001012322	0.0337631	0.00873316	0.019715	0.00780653	0.0153709	0	0.0477186	0.0464909	0	0	0	0	0
NM_001172074,NM_028439	3.75098	3.00157	3.21413	3.13982	3.6537	2.9527	3.99512	4.39822	3.83333	7.00402	3.33759	5.08066	5.08312
NM_207233	0	0	0	0	0	0	0	0	0	0	0	0	0
NM_010133	1.94497	2.01174	2.15	1.92839	1.67767	1.4455	1.52939	0.431643	0.846825	0.772634	1.06096	0.667218	0.760697
NR_038008	0.00709478	0.0185865	0.00785045	0.008704	0	0	0	0	0	0	0	0	0
NM_001025156,NM_029955	6.5258	6.28356	6.43374	5.6415	6.65464	7.04008	8.27498	5.80096	7.21799	6.76884	7.62481	4.62224	5.74325
NM_028787	29.0865	30.6574	29.7316	31.2474	31.9741	36.1235	28.9316	31.4646	32.4012	32.3439	39.1472	33.3981	33.5427
NM_027677	1.03737	1.28253	1.3174	1.4514	1.73658	0.517712	4.58309e-06	0.415801	0.45043	0.521111	0.550173	0.618062	0.706321
NM_145128	5.13182	4.78995	4.60482	5.01537	4.47797	4.90619	4.87515	5.95797	4.52425	5.35413	4.90855	5.91962	6.11588
NM_001033041	0.00597266	0.0180682	0.0284608	0.0065173	0.0201326	0	0.0390145	0.0471389	0	0	0	0	0
NM_028399	10.351	11.2484	10.9616	10.0562	9.44572	14.9762	21.2126	14.0622	18.1462	20.0637	11.7251	16.9228	14.2671
NM_178690	15.3605	15.5272	15.3565	15.2884	15.9349	19.8938	17.7471	22.9086	24.0553	19.3636	20.0707	24.1506	25.0766
NM_181750	12.9871	13.7119	12.7696	12.8867	13.395	13.8734	13.8459	14.6623	13.1253	14.1318	10.269	14.6634	14.8513
NR_029543	0	0	0	0	0	0	0	0	0	0	0	0	0
NM_026390	37.5225	38.1465	38.4479	38.7192	41.5719	50.5843	51.2682	40.8067	31.8747	56.6988	58.925	43.156	37.0622
NM_172485	0.372594	0.311408	0.251052	0.340944	0.263851	0.160834	0.40929	0.560635	0.477218	0.321291	0.465691	0.302649	0.692893
NM_178691	1.32285	1.36341	1.44126	1.23795	1.37973	1.83753	2.54494	1.35485	1.9152	2.17851	1.75204	2.00441	1.70252
NM_177604	0.530466	0.435958	0.504422	0.449673	0.480284	0.684412	0.539673	0.761388	1.75061	0.756488	0.775971	0.815246	1.25159
NM_001170632,NM_144960	0	0	0	0	0.00843471	0	0	0	0	0	0	0	0
NM_011082	0	0.00288066	0	0.00693835	0	0	0	0	0	0	0	0	0
NM_026976	0.0249499	0.0421146	0.00839769	0.039633	0.0185184	0	0	0.062185	0	0	0	0	0
NM_010548	0.0194174	0	0.0111973	0	0	0	0	0	0	0	0	0	0
NM_001136070,NM_010709	26.7161	25.772	25.5666	26.2603	25.0287	25.2821	24.569	28.4923	24.2965	23.4195	23.185	29.0687	20.664
NM_175382	1.49244	1.55107	1.52248	1.33662	1.31811	1.19403	0.665434	0.702111	1.17271	0.956112	1.06167	0.253029	0.726616
NM_011924	0.00585155	0	0.00902319	0	0	0	0.020716	0	0	0.0288443	0	0	0
NM_007799	0	0	0	0	0	0	0.0427609	0	0	0	0.0410687	0	0
NM_145509	1.8328	1.69145	2.33005	1.75003	2.48821	1.29412	1.6178	0.873523	1.46876	1.46606	1.45556	1.05835	1.79897
NM_177243	0	0.0113423	0.0125191	0	0.00766247	0.0889732	0	0	0.0281093	0	0.0228466	0.061861	0
NM_178079	1.90029	2.05861	1.83158	2.02663	1.59069	3.79179	3.26563	4.22481	3.47832	3.46504	3.36722	4.16847	3.84958
NM_173865	12.4032	11.8697	13.4654	13.3636	13.3715	10.0429	9.43154	13.2304	14.9592	11.3014	9.20703	10.8049	20.3613
NM_144875	12.7158	12.4283	12.1048	12.3243	9.53471	9.9947	11.318	9.91409	8.32361	9.5946	9.88311	7.89799	4.79489
NM_001145804,NM_175294	47.6097	50.6135	45.5729	47.0863	55.2618	49.7348	46.6507	48.3191	40.1957	52.9162	48.9	48.8047	42.3158
NM_001177628,NM_145977	0.342353	0.309232	0.488542	0.58554	0.337137	1.19419	1.26105	0.207021	0.745646	1.7876	1.88012	0.379053	0.541983
NM_007923	6.29794	6.79962	5.50305	7.73992	8.38436	6.99034	5.94329	6.68875	7.14295	8.21212	8.17137	9.65599	12.022
NM_001033250	0.0149713	0.0564319	0.0139469	0.0660353	0.0830728	0.266567	0.106005	0	0	0	0	0	0
NR_029777	0	0	0	0	0	0	0	0	0	0	0	0	0
NM_144810	31.7983	33.5722	38.4682	49.3235	107.581	11.1442	2.09652	14.1262	22.1583	11.3368	11.0862	19.6968	101.416
NM_001195025,NM_028778	4.46503	6.18647	5.05861	12.8287	12.6869	1.22292	0.714179	3.09836	3.81378	2.49875	2.58626	7.80107	10.8528
NM_172516	8.50721	8.04336	7.96614	7.76419	7.60192	10.719	10.0015	12.0931	14.1099	11.0283	10.5027	9.9908	13.3786
NM_172517	9.61566	9.34775	9.35346	7.88972	10.3611	7.30441	9.54332	8.67186	9.38773	7.29337	8.23927	6.39478	9.80149
NM_029025	1.59372	1.67502	1.81355	1.31357	1.54847	2.17658	2.67053	1.43444	1.5916	1.49277	1.59199	1.25807	1.43042
NR_045892	0	0	0	0	0	0	0	0	0	0	0	0	0
NM_010732	0.203137	0.16466	0.20593	0.221038	0.175436	0.147916	0.216742	0.107495	0.0188351	0.184753	0.20889	0.118929	0.119634
NM_001099276	1.90014	1.77402	1.90338	1.57637	1.08043	2.03171	1.99001	1.01231	1.11018	1.7045	1.38241	0.562869	0.647519
NM_133819	29.6792	31.8135	28.743	33.2623	37.3318	33.3618	25.8496	17.928	27.3083	35.2254	36.7687	20.1068	32.7338
NM_001160268,NM_182930	0.787053	0.706296	0.600746	0.719051	0.368248	0.748149	0.970609	0.674855	0.484953	1.05728	0.941175	0.575152	0.160551
NM_026680	0	0	0	0	0	0	0	0	0	0	0	0	0
NM_178260	0	0	0	0	0	0	0	0	0	0	0	0	0
NM_031192,NM_031193	0	0	0.00887629	0	0	0	0.0674677	0	0	0	0	0.263194	0
NM_175443	0.277299	0.158543	0.238373	0.182374	0.157022	1.4038	1.5151	2.80293	0.65554	1.47386	0.821379	2.45246	0.498976
NM_021355	22.033	20.4356	18.4667	17.9226	16.1013	18.3194	16.2439	23.8502	19.7805	17.3753	17.044	21.2408	19.5234
NM_027979	0.0283266	0.0249577	0	0.0169584	0.00861572	0	0.0544456	0	0.0394099	0.0429522	0	0.0497685	0
NM_007695	0.0678466	0.0334472	0.0155596	0.0760376	0	0.172817	0.188238	0.107672	0.0399978	0.120532	0.153539	0.143699	0
NM_016749	0.16403	0.205837	0.252196	0.129846	0.0264877	0	0.125085	0	0	0.189709	0	0	0.0580448
NM_031189	0.708735	1.03846	0.903075	0.880883	0.295066	0.979571	2.05661	0.125451	0.139806	0.965028	1.4424	0.142564	0
NM_173771	0.0249133	0.0432744	0.0299151	0.0400615	0.0678862	0.130612	0	0.114322	0.0758306	0.0826465	0	0.184098	0.220849
NM_028057	120.601	131.805	124.862	140.069	140.172	133.084	112.206	124.19	122.856	127.263	138.978	134.47	133.843
NM_028320	102.345	105.661	107.379	111.636	113.124	101.625	92.8018	116.738	133.864	91.0607	114.146	124.854	156.153
NM_153128	7.09544	7.36737	7.13422	7.37998	7.71196	8.12876	7.06606	6.68156	9.45122	8.64003	7.37782	7.91177	8.48109
NM_145510	20.0386	20.514	21.0275	20.437	21.9504	20.6696	17.6799	15.0866	18.0472	17.0916	21.4787	15.2439	19.488
NM_152895	19.223	17.6547	17.3984	17.1009	18.0659	24.1875	22.5672	27.5154	29.277	21.8533	21.4437	27.1404	30.4486
NM_009307	0	0.00800333	0.00395631	0.0159539	0	0.0162883	0.0361383	0	0	0	0.0246762	0.0234858	0.0196746
NM_001278115,NM_026024	3.52183	3.54069	3.39445	3.81885	4.05148	2.48397	2.78287	2.56316	2.58053	2.01699	1.27113	3.33058	2.98083
NM_177081	0.119232	0.115648	0.11881	0.149965	0.227171	0.151328	0.0722335	0.110385	0.114066	0.132695	0.120085	0.246995	0.0716562
NM_026823	93.3143	100.898	97.7299	103.644	95.3943	98.3306	85.1055	88.08	78.8119	96.4889	108.043	90.5148	75.4873
NM_053106	40.1347	43.2559	37.1916	41.8481	31.1231	56.3799	40.5923	19.9806	20.8209	51.4812	53.7017	20.3601	16.4436
NM_007791	362.033	393.305	409.629	447.044	386.124	423.811	334.714	294.398	336.722	391.566	587.199	375.779	374.718
NM_013750	291.578	291.551	318.356	314.629	277.857	215.709	173.366	165.852	169.858	191.412	223.117	159.235	175.058
NM_001112702,NM_021467	0.726259	0.903789	0.763456	0.423987	0.464256	0.123325	0.0989144	0.215883	0.116885	0.312161	0.0848405	0.128617	0
NM_133664	0.0267313	0.0333755	0.0198405	0.0177557	0.173808	0.0185986	0.0412642	0	0	0	0	0.038146	0.101227
NM_001130174,NM_001130175,NM_001130176,NM_001130177,NM_001130178,NM_001130179,NM_001130180,NM_001130181,NM_011619	0.911628	0.778869	0.870822	0.815545	1.13703	0.211756	0.283219	0.177461	0.305384	0.469164	0.0781136	0.284917	0.360532
NM_001160145,NM_001160146,NM_025439	46.3213	42.742	44.241	46.0913	37.2712	41.467	41.0666	47.8565	43.7486	35.1912	38.7696	48.6373	38.2962
NM_001270609	0	0	0	0	0	0	0	0	0	0	0	0	0
NM_001081023,NM_014193	0.0577436	0.0675789	0.0698233	0.0641034	0.0398245	0.0345829	0.0136311	0	0.00986345	0.0215136	0.0364829	0.0373992	0
NM_001039472	2.86491	2.33381	2.40723	2.2708	1.37176	1.83138	3.18496	0.793911	0.966685	1.88231	1.43006	0.836399	0.466256
NM_026500	4.0128	3.74038	3.66267	3.74355	3.61757	5.00517	4.67896	5.46487	5.79709	3.91392	4.49687	5.46618	5.2259
NM_001081258	1.0736	0.968833	0.893205	1.00947	0.944851	0.63845	0.771487	0.330745	0.442776	0.770452	0.533624	0.369959	0.321038
NM_001160251,NM_177643	9.74396	10.302	9.31286	10.792	12.5149	10.8649	9.7855	9.34217	10.9666	14.7747	10.8597	12.8105	13.5535
NR_045324,NR_045325	2.30107	3.09439	3.248	2.90037	2.46742	0.26227	1.94737	1.88172	1.38806	1.7965	1.74935	3.45541	0.785996
NR_037986	0.307009	0.346143	0.19111	0.326753	0.166807	0.208097	0.058198	0.161248	0.0599	0	0.141961	0.107601	0.0633688
NR_029795	0	0	0	0	0	0	0	0	0	0	0	0	0
NR_029820	0	0	0	0	0	0	0	0	0	0	0	0	0
NM_177397	0.0115854	0	0	0	0	0	0	0	0	0	0	0	0
NM_001166501,NM_181347	2.80296	2.75958	2.69556	2.751	3.87543	2.73822	2.72054	3.23162	2.73386	3.36911	2.88958	3.35788	4.80503
NR_040455	0	0	0	0	0	0	0	0	0	0	0	0	0
NM_172643	8.77913	8.6795	8.23081	8.67719	10.372	10.1629	9.77275	9.19566	11.8241	11.1049	10.4449	9.94117	11.3657
NM_009791	2.23449	1.84744	1.80448	1.80731	1.90006	1.47464	2.05703	0.768997	1.19682	1.62456	1.12303	0.906997	0.944443
NM_031164	0	0	0.00579939	0.00549394	0	0	0	0	0	0	0	0	0
NM_001081027	1.79208	1.93694	1.40272	1.72274	1.38886	1.27357	0.997244	2.37092	1.67922	2.16244	0.812657	2.61365	1.43474
NM_020025	0.0987628	0.0671534	0.0990128	0.0623602	0.00956783	0.303861	0.695676	0.104079	0.0355846	0.338026	0.191539	0.0971277	0.0143003
NM_001038592,NM_001038593,NM_001038594,NM_023505	5.61676	5.80028	5.72367	5.76525	5.83951	5.86023	4.45085	5.5401	5.61774	4.92836	4.88554	6.1107	5.58567
NM_001159866,NM_019562	11.9163	12.2782	11.2783	11.6588	13.781	11.0883	11.4256	11.6214	12.9642	9.30641	10.7835	10.422	12.4654
NM_001145807,NM_153539	0.0242661	0.0235113	0.0287293	0.0146391	0.0319566	0.0405854	0.0320093	0.185891	0	0.0698209	0	0.166488	0.0368159
NM_011198	18.2409	29.8711	21.0186	95.8729	148.624	45.0787	14.6571	18.3485	14.9264	120.913	92.2737	186.5	184.282
NM_001159730,NM_024458	0.0884976	0.0673355	0.0965349	0.0379049	0.0625313	0.099479	0.0560881	0.0777246	0.11552	0.285188	0.213519	0.103751	0
NM_133780	31.9707	29.4955	28.8284	28.1946	34.7133	39.0993	36.832	37.0899	37.1522	49.4158	39.3071	38.8099	47.9856
NR_038011	0.0539815	0.0498965	0.0443838	0.0251654	0.0220852	0.146949	0.191598	0.12177	0	0.120054	0	0.249115	0
NM_001039511,NM_001039512,NM_054102	36.8751	40.6427	36.3338	39.2078	46.1038	35.3052	25.9983	35.4126	32.235	34.2464	30.4127	35.5691	39.7787
NM_026876	14.363	13.6879	14.8048	12.9106	13.5181	11.7296	15.164	10.58	16.3311	10.5678	13.1475	7.95004	13.5044
NM_022018	26.1055	24.9487	21.734	24.719	21.3686	24.4234	24.2033	26.8728	17.3123	27.1781	26.5817	25.8377	16.0523
NM_001039644	22.3601	22.6239	22.4742	22.0017	26.4932	27.8506	30.1791	26.1331	28.7433	28.4194	36.3821	25.5902	34.0941
NM_177756	0.165883	0.117088	0.144086	0.124741	0.042877	0.147026	0.204192	0.0975543	0.0153542	0.155542	0.0589398	0.0469712	0.0243972
NM_001081197	0	0	0	0	0	0	0	0	0	0	0	0	0
NM_026369	141.957	159.636	153.32	166.594	171.637	153.248	132.873	105.227	100.109	147.901	197.408	118.852	122.009
NM_010877	0.117783	0.137366	0.137365	0.154857	0.159584	0.216185	0.106402	0.0826798	0	0.223896	0.264127	0.10704	0.0786011
NM_175460	0.499626	0.444774	0.382737	0.414899	0.572083	1.58586	1.24597	1.52068	1.65358	1.17884	1.5344	1.54689	1.43506
NM_001033162	0.0310286	0.0138656	0.0498452	0.026851	0.0582756	0	0.0890253	0	0	0.123956	0	0	0
NM_026380	0.0112248	0.0144188	0.0191659	0.024802	0.041	0.0274185	0.0248316	0.0176147	0.0211054	0.0115012	0.0250095	0	0.0335357
NM_011267	2.43829	3.86648	2.09075	7.65499	20.3734	1.18309	0.566243	1.3044	1.4423	4.24241	3.35117	8.45587	20.3016
NM_011882	0.37518	0.375607	0.311713	0.257463	0.249641	0.383922	0.30548	0.300556	0.403219	0.284669	0.18211	0.198571	0.281679
NM_001008426	0.0041897	0	0	0	0	0	0	0	0	0.0277975	0	0	0
NM_178244	0	0	0	0	0	0	0	0	0	0	0	0	0
NM_008131	6.75699	6.90371	6.74865	6.89011	6.17672	6.5871	7.71882	12.9415	15.6029	5.86635	7.70489	18.4413	16.7576
NM_001204908	0.00692181	0.0125941	0	0.0071493	0	0	0	0	0	0	0	0	0
NM_021433	27.3503	26.7559	29.2008	29.2627	31.0103	25.4125	21.8617	23.4499	24.963	22.2137	27.3066	22.8771	37.2222
NM_001145781,NM_026683,NM_028250	25.652	25.6235	27.5515	29.2553	23.8605	19.7823	17.4358	21.5129	21.0463	18.675	16.4341	22.3403	22.0237
NM_001160180,NM_001160181,NM_001160182,NM_022329,NM_172843	60.2788	64.1898	60.894	62.5874	69.5962	69.4359	60.7992	62.9768	60.4004	59.939	71.8485	64.445	69.0436
NM_130456	0.00862231	0.0087722	0.0123779	0.0128795	0.00498591	0.0702202	0.0281613	0	0	0	0	0.062359	0
NM_001136104,NM_009595	7.96924	8.09579	7.31132	10.9744	13.3618	9.11526	6.33385	5.52701	5.5166	10.6136	11.7878	11.405	15.5701
NM_028333	0.349968	0.177747	0.154664	0.135484	0.143131	0.155068	0.256405	0.4611	0.328243	0.0975673	0.330944	0.333311	0.221104
NR_027984	7.8524	6.96975	7.67247	7.73577	8.24773	6.14655	6.12644	6.44668	5.82564	5.64393	9.06285	6.83598	6.65016
NM_001033284	4.22564	4.5032	4.06801	4.82019	3.61279	5.58074	7.50724	7.40846	9.81817	5.58803	5.35042	7.47063	7.46643
NM_001159986,NM_033354,NR_027641	4.45249	4.41271	4.07857	3.81776	3.32138	3.85564	5.89376	4.36134	2.34768	5.43636	1.87973	3.84463	1.65347
NM_001205204,NM_007495	0.197767	0.140537	0.128448	0.173724	0.168514	0.236109	0.146323	0.110413	0.139518	0.207272	0.224861	0.0925908	0.0669605
NR_030441	0	0	0	0	0	0	0	0	0	0	0	0	0
NM_011931	5.53059	5.76578	5.53798	5.45662	5.58712	5.93218	5.80365	5.46148	5.88232	6.04193	5.5822	5.64857	4.84277
NR_028518	0	16.601	0	0	0	161.087	129.206	0	0	0	0	0	0
NM_022312	0.0790961	0.040984	0.0398685	0.0906378	0.071887	0	0.0786486	0.0343303	0.0185872	0.0372276	0.0453218	0.0696623	0.0361832
NM_001162896,NR_028111	3.35773	3.79186	3.57625	3.86757	4.17206	4.10154	4.76969	3.88018	2.53212	5.08696	6.23413	2.75272	3.84227
NM_025474	18.3632	19.6096	19.1219	19.7789	18.9169	15.5547	16.4792	14.0804	14.6055	14.658	17.324	15.7801	13.7622
NM_001024952	7.18427	7.11416	6.62813	7.38305	7.91248	9.64817	7.3399	9.03573	11.9877	9.18904	7.71483	10.0802	11.0835
NM_080844	0.0172977	0.0260789	0.0292479	0.0130384	0.0248418	0.0265377	0.0418603	0	0.140365	0.149593	0.120611	0.0926935	0.112255
NR_002840,NR_039577	27.4679	32.4151	29.4098	26.7113	28.9303	26.3046	29.4972	28.7439	24.2683	31.5392	21.7618	31.8041	22.7701
NR_028543	0	0	0	0	0	0	0	0	0	0	0	0	0
NM_001159930,NM_027429	3.29249	2.81248	3.31756	2.81589	2.94779	2.67321	2.94542	2.02934	3.54091	1.94568	3.06247	2.05022	2.08347
NM_028664	0.0718056	0.100496	0.0624675	0.0391001	0.0489993	0.04368	0.118677	0.157502	0.0336227	0.0646761	0.0645336	0.0636904	0.124636
NM_009452	0.253333	0.369622	0.37451	0.315482	0.245659	0.109885	0.116855	0	0.0845839	0.081352	0.200461	0	0.0447411
NM_183391	4.60415	7.34858	5.2675	11.7678	20.3097	1.88241	0.490889	2.05179	1.38486	5.57124	6.4644	7.05449	7.10613
NM_001039045,NM_026078	10.6166	10.078	11.1834	9.44044	9.1719	9.77136	9.17233	10.1419	10.1251	8.27797	9.59336	10.3023	7.72943
NR_040562	1.69433	1.86869	1.83432	1.99526	0.714076	1.59809	1.34447	0.590624	0.859168	2.10902	1.15039	1.38595	0.48726
NR_002870,NR_029810	25.0225	32.6501	30.9745	31.0119	19.2417	110.657	86.4224	420.957	75.1455	94.4232	36.7292	72.7039	25.5456
NM_016796	7.26679	7.65623	7.59253	7.58932	8.24475	10.7242	12.9062	15.457	12.7009	10.5298	11.5993	15.0312	13.3368
NM_010865	0.00668652	0.00561193	0.00672567	0.0206623	0.0138235	0	0	0.105546	0.0832277	0	0	0.113584	0.0334464
NM_010629	30.1774	28.9118	29.1764	28.643	30.4907	34.6001	33.4264	40.5725	37.7579	32.7729	38.7747	39.148	38.7354
NM_028776	14.17	14.8225	15.4757	13.1943	12.7495	17.7754	21.5983	13.7398	15.9644	26.5398	21.6822	14.031	11.6477
NM_027279	1.83731	1.60125	1.7253	1.28046	2.47232	0.413987	1.72007	0.857997	1.25336	0.72674	1.05869	0.964999	0.778178
NM_011345	0.00889062	0.00776237	0.00862579	0.0133405	0.149725	0	0	0	0.0218652	0	0.0259099	0	0
NM_001164059,NM_011346	0	0	0	0	0	0	0	0	0	0	0	0	0
NM_011347	0.092241	0.112707	0.0887506	0.10794	0.082241	0.0480766	0.0430562	0.0797988	0.156078	0.0703939	0.0945169	0.10219	0.0871458
NM_007976	0.150912	0.170646	0.138849	0.172693	0.126223	0.128105	0.117046	0.107311	0.173575	0.219722	0.104174	0.193587	0.0875218
NM_001276455,NM_054087	40.2233	42.3699	44.1721	44.8783	43.2929	39.0734	29.1834	33.205	32.6901	38.443	28.9418	36.9284	30.4052
NM_029115	3.48624	3.17105	2.96431	2.99403	2.65354	2.04281	3.07879	3.36339	2.79728	2.24658	2.17766	2.74739	2.65505
NM_138314,NM_178071	9.94625	9.80071	9.88259	10.2689	10.5819	9.54098	9.70476	9.5923	10.8627	9.02647	7.5315	7.30971	9.53119
NM_019759	0.790026	0.645695	0.701193	0.683168	0.707358	0.324607	0.47113	1.07002	0.410634	0.295268	0.857248	0.537947	0.790219
NR_040303	0	0	0	0	0	0	0	0	0	0	0	0.0771318	0
NM_001081126	7.26258	6.55674	7.1126	7.12106	5.93382	5.95783	5.92178	3.12134	4.97236	4.78436	5.74887	3.75961	4.29841
NM_027430	36.6869	37.6499	38.3364	37.2358	37.6887	34.6212	30.527	34.2291	32.542	34.0324	37.1216	42.6687	28.3527
NM_173029	0.00230427	0.00239671	0.00244752	0.00771827	0.00577727	0	0.0326309	0	0	0	0	0	0
NM_011804	11.3055	11.6576	11.2725	11.4521	11.1826	9.7055	10.2135	11.8795	13.8825	8.03385	8.98029	14.451	13.5619
NM_001113391,NM_001113392,NM_001113393,NM_001113394,NM_031162	0	0.00829013	0.0139842	0.000266022	0	0.235994	0.0914075	0.184459	0.330845	0.34259	0.168905	0.248577	0.0171208
NM_021610	0.0101979	0.0107956	0.0176424	0.0121319	0	0	0	0	0.0283761	0	0	0.0358346	0.0300193
NM_001164528	1.31408	1.47269	1.33951	1.46915	1.52582	1.24675	1.2598	0.636325	0.616407	1.43411	1.64985	0.533326	0.648134
NM_030245	12.701	12.111	11.5858	11.9915	12.3571	12.4245	11.5534	9.65421	12.2206	12.9858	10.4175	8.78128	11.0334
NM_001160261,NM_001160262,NM_175461	0.146393	0.117403	0.142582	0.124742	0.222144	0.114858	0.106923	0.0577702	0.0529877	0.116364	0.0649025	0.0572517	0.180845
NM_001039483	9.41199	9.8293	9.53336	9.65668	9.06504	8.04484	7.36914	9.21982	7.89783	7.4497	7.76334	8.48082	7.46844
NM_019993	11.7285	11.2072	11.6586	11.7638	11.4705	11.0047	10.6817	10.299	7.12441	10.2665	9.25877	10.7696	7.17694
NM_001159731,NM_009107	0.0629129	0.0354876	0.0251362	0.0234397	0.0803512	0	0	0	0	0.111145	0	0.110505	0.064119
NM_033652	0.00709568	0	0.00391348	0.0114689	0.00412825	0.0165386	0.0183468	0	0	0	0.0223764	0	0
NM_009063	0.855264	0.764596	0.705507	0.859972	0.792895	0.833623	1.60093	1.35223	0.755571	1.71466	1.48992	1.41704	0.959696
NM_001033185	0.0289568	0.0280744	0.0579153	0.00969813	0.0105206	0	0.0467555	0.0647723	0.0785602	0.0925684	0	0.0864449	0
NR_040438	1.24664	1.29488	1.23241	1.08886	1.31346	0.673304	0.586451	0.517368	0.168647	0.977506	1.00506	0.0809023	0.20332
NM_001033499	0	0	0	0.0721243	0	0	0	0	0	0	0	0	0
NM_012009	0.0196797	0	0.00879733	0	0.28909	0	0	0	0	0	0.0642187	0	0.204808
NM_001039593	0.0194278	0.0209932	0.0214971	0	0	0.103582	0	0	0	0	0	0	0
NM_177068	17.9659	17.7619	17.3414	18.7189	17.5308	11.8534	12.468	12.5053	10.2808	12.0751	18.4302	11.2558	9.94724
NM_144559	0	0	0	0.0114772	0.0367572	0.0980927	0.0786785	0.0950624	0	0.109549	0	0	0.241234
NM_001081275	1.32207	1.33272	1.0494	1.36987	1.00489	0.313004	0.769033	1.59233	1.17037	1.29635	0.436545	1.38735	2.47538
NM_008623	0.190064	0.212475	0.214006	0.203121	0.147586	0.143281	0.188287	0.155343	0.228733	0.0722853	0.127298	0.0595699	0.122858
NM_001243062,NM_001243063,NM_009803	0.0697946	0.0541848	0.100082	0.0712641	0.0705323	0	0	0	0.118661	0.0594308	0.0684942	0	0.0926433
NM_013474	2.10316	2.37776	2.28416	2.53687	1.97968	1.1789	0.747313	0.258821	1.15375	0.419152	0.683588	1.69984	0.406855
NM_172845	10.5105	9.40714	9.66207	9.41184	6.97632	5.84714	6.06361	6.74074	4.88369	4.74221	6.67558	6.13977	4.42237
NM_020579	17.1626	17.7831	17.1942	18.5821	13.7759	17.0878	17.4677	11.7014	13.0272	17.339	20.0153	12.2721	12.0923
NM_001128609,NM_011615	12.4442	12.2554	12.6812	12.3271	13.1161	13.8339	12.8061	11.077	13.2685	12.7465	13.285	12.1428	14.1958
NM_011070	67.139	72.6461	72.5665	83.4075	80.1056	66.7062	53.0832	66.0192	54.9186	58.3115	75.7807	64.3833	76.114
NM_001122680,NM_027893	0.190709	0.19523	0.223283	0.242819	0.221481	0.302102	0.378269	0	0.0482866	0.42141	0.525187	0.0231633	0.145685
NM_001005508	0.0157624	0.0118821	0.014181	0.0202276	0.0154492	0.0237786	0	0.023044	0.0138054	0.0150463	0	0	0.0146048
NM_009480	16.3171	15.2482	16.1491	15.0124	13.9117	17.2607	19.5519	15.2797	19.0802	16.5613	19.7268	13.0134	18.6945
NM_001164525	0.354667	0.576817	0.529896	0.402621	0.149985	0	0.896154	1.99005	1.03301	2.0665	0.464828	1.38635	0.555916
NM_172647	3.98643	3.90206	4.15901	4.68465	4.33388	6.22908	6.62455	7.12984	7.71222	6.83599	10.7828	7.6534	6.71776
NM_019484	3.56965	3.23597	3.86768	3.01	2.7091	2.56172	3.84164	1.77582	2.95378	2.10395	2.9388	1.7341	2.18218
NM_018729	0.0035204	0	0	0.00716261	0.0155501	0	0	0	0	0	0	0	0
NM_007649	0.0104443	0.0725045	0.0135256	0	0	0	0	0	0	0.069295	0	0	0
NM_013730	0	0	0	0	0.00521298	0	0	0	0	0	0	0	0
NM_001252472,NM_013489	0.0144081	0.0102093	0.0116417	0	0.0289901	0	0	0	0.0191718	0	0	0	0
NM_030710	0	0	0	0	0	0	0	0	0	0	0	0	0
NM_009938	144.49	140.85	139.373	140.659	139.116	144.315	138.258	174.474	154.02	137.551	143.022	164.875	165.303
NM_001159525,NM_023041	42.3293	43.2787	41.1697	43.1462	37.704	41.8707	44.9487	43.0977	40.8933	40.4169	39.8689	40.0245	35.0352
NM_153555	35.5021	35.7657	34.2337	35.5558	28.2742	35.6357	40.1125	36.9113	40.9645	36.6187	26.1705	37.4459	31.6397
NM_080419	20.4987	20.4142	24.17	22.6953	19.8636	17.5838	17.1362	13.6954	14.9421	15.6164	17.2945	14.1429	15.8589
NM_001039484	0.0118969	0.0112265	0.0181523	0.00971323	0.00248339	0.00994894	0.0267301	0.0152896	0	0.0218509	0	0	0.0120173
NM_026234	5.49998	6.12632	5.44493	5.87721	7.24016	5.45645	5.66478	5.75579	5.93733	6.02718	6.02706	6.48449	6.39671
NM_029612	0.340331	0.203835	0.383759	0.39196	0.297865	0	0	0.170603	0.126751	0.121908	0.0750985	0.193876	0.167746
NM_001145800,NM_033608	0.984712	1.02226	1.07576	1.14581	1.0396	0.70889	1.21896	0.408247	0.80623	0.509271	0.732303	0.536226	0.828184
NM_178598	168.499	178.743	179.67	197.326	261.086	126.697	115.434	83.1097	73.1747	131.835	231.956	114.323	169.273
NM_027972	0.385826	0.447247	0.303349	0.273381	0.481127	0.159593	0.380979	0.270631	0.133272	0.270508	0.325151	0.270809	0.349631
NM_177723,NR_027644	0.0826539	0.0987918	0.0702927	0.081156	0.0489075	0.155617	0.249637	0.24696	0.0737448	0.173792	0.119878	0.0570463	0.0477885
NM_007768	0	0.00806801	0	0.0161337	0.00972398	0	0	0	0	0	0	0	0
NM_008763	0	0	0.0150145	0	0	0	0	0	0	0	0	0	0
NM_001001809	0	0	0	0	0	0	0	0	0	0	0	0	0
NM_146881	0	0	0	0	0	0	0	0	0	0	0	0	0
NM_146651	0	0	0	0	0	0	0	0	0	0	0	0	0
NM_001013779	0.38731	0.276727	0.275189	0.351405	0.435857	0.440382	0.66004	0.195533	0.35293	0.508016	0.483819	0.488254	0.497392
NM_175026	0.0207759	0.0145689	0.0182604	0.0150243	0.0847391	0	0	0	0	0.0195838	0	0	0.0570279
NM_001162938	0.012801	0.0037762	0.00386684	0	0.00520349	0	0	0	0	0	0	0	0
NM_146717	0	0	0	0	0.0163286	0	0	0	0	0	0	0	0
NM_146716	0	0	0	0	0	0	0	0	0	0	0	0	0
NM_146718	0	0	0	0	0	0	0	0	0	0	0	0	0
NM_146722	0	0	0	0	0	0	0	0	0	0	0	0	0
NM_001206926	0	0	0	0	0	0	0	0	0	0	0	0	0
NM_146721	0	0	0.0171017	0	0	0	0	0	0	0	0	0	0
NM_146720	0.0149271	0.028647	0	0.0142237	0.0141449	0	0.0685737	0	0	0	0	0	0
NM_146305	0.140832	0.0844808	0.13061	0.134819	0.0884113	0	0	0	0	0	0	0	0
NM_011465	0.89365	0.844753	0.728623	0.760901	0.628766	0.433948	0.251567	0.473824	0.372271	0.608092	0.208899	0.59601	0.381026
NM_025470	0.0211894	0	0	0	0	0	0	0	0	0	0	0	0
NM_207137	0	0	0	0	0	0	0	0	0	0	0	0	0
NM_146714	0	0	0	0	0	0	0	0	0	0	0	0	0
NM_146761	0	0	0	0	0	0	0	0	0	0	0	0	0
NM_207694	0	0	0	0	0	0	0	0	0	0	0	0	0
NM_019445	0.88	0.940973	0.772992	0.883283	0.613235	0.438001	0.343947	0.413073	0.435291	0.566571	0.307071	0.391009	0.320724
NM_133809	0	0	0	0	0	0	0	0	0	0	0	0	0
NM_029453	0	0	0	0	0	0.0143437	0	0	0	0.0315031	0	0	0
NM_012012	1.67013	1.55562	1.42942	1.32072	1.62942	0.690552	0.68637	0.580353	0.558016	0.849019	0.691052	0.401679	0.802122
NM_029756	4.99841	5.04972	4.72327	4.82795	4.7853	5.03136	6.84224	5.01605	6.27617	5.61459	4.36187	6.18554	5.98508
NM_001012330,NM_013915	5.94024	5.87501	6.54967	5.63541	5.48829	7.52782	9.09476	5.37339	8.42393	6.94598	6.76455	4.50682	6.99498
NM_027077	0	0	0	0	0.024115	0	0	0	0.110306	0	0	0.139299	0
NM_001034899	0.0570213	0.0382075	0.0411531	0.0578884	0.0458801	0.141449	0.168748	0.0548022	0.0664678	0.201015	0.198765	0.0514174	0.0646956
NM_024282	24.0278	25.2834	25.1763	24.6669	33.0766	28.0184	28.8279	30.1679	30.5478	25.7706	38.2595	30.2139	43.218
NM_025511	41.248	44.7496	40.6189	38.5611	37.7176	46.1607	43.1398	36.5347	34.3684	55.5594	32.7324	43.4139	22.1701
NM_026626	0.926041	1.09129	0.93573	0.918272	0.955578	1.0827	1.42316	1.04692	1.32303	2.0572	1.26802	0.904778	1.00762
NM_001161665	6.76314	4.5108	4.40209	4.45377	3.24642	5.87438	5.29102	8.65343	3.58725	6.63087	2.59498	7.14587	2.44473
NM_146105	10.5715	10.7203	10.6049	11.242	9.88887	15.8994	13.9344	8.19749	11.2038	15.5976	18.8543	8.93092	9.63161
NM_178653	24.6436	24.7829	23.6884	25.4008	24.453	24.1385	23.3387	24.0743	26.2037	23.3945	24.4358	26.1107	21.115
NM_001033285	20.707	21.0484	19.0798	20.5622	20.4276	25.5263	24.5453	18.4611	20.9447	28.118	24.9168	19.0423	20.5694
NM_001081175	9.50355	8.0976	9.30219	8.22913	7.18262	7.00697	7.32781	8.20917	10.2808	6.57296	6.32374	5.50127	6.87507
NM_007415	20.8244	19.8383	19.6423	19.9144	18.9629	17.6789	18.6161	15.7448	15.1054	17.37	16.4443	15.4168	14.9339
NM_001103182,NM_175186	2.96368	2.9422	2.69266	2.68681	3.51285	2.43679	2.42553	1.74679	2.44221	2.94967	2.12885	1.53932	2.50541
NM_133225	35.6179	37.1692	36.5135	37.2204	40.4094	47.2032	40.6277	37.4751	39.6818	48.2275	50.1676	37.7638	44.3026
NM_145943	17.5334	18.5522	17.1988	20.9094	21.0015	22.1189	18.0784	17.0819	15.9834	21.8763	21.1163	19.1354	20.2809
NM_177099	0	0	0.00477213	0.00529098	0.0128434	0	0	0	0	0	0.0311108	0	0.0417171
NM_133705	28.0757	27.6009	31.1681	28.8985	41.2398	18.1676	17.8672	16.5501	17.1999	19.2434	25.973	16.6415	32.7829
NM_010094	2.04433	1.7828	2.01568	1.86313	1.75997	2.3345	2.22302	2.51613	1.90382	1.89405	2.94088	2.41344	2.17944
NM_144794	27.7962	29.5248	29.6014	28.7765	26.2861	32.7753	31.008	25.7921	23.7786	29.3901	37.2287	23.2097	23.7098
NM_001033819	0.0183452	0	0	0.00715715	0	0	0.0824363	0.0471535	0	0	0.0464836	0.0629309	0
NM_030131	11.9177	12.5901	12.6751	13.5786	13.5865	10.0202	10.1512	10.0424	10.8572	9.64252	12.5724	9.46095	12.7077
NM_001160211,NM_001160212,NM_028408	0.00539573	0.0275239	0.0206398	0.0264747	0.0224351	0.0223438	0.024787	0	0	0.0785257	0	0	0.0269898
NM_012058	37.5245	37.7675	39.7075	42.4337	41.3084	32.302	29.4835	33.4954	33.341	29.5978	32.1803	36.9529	33.9932
NR_015458	0	0	0	0	0	0	0	0	0	0	0	0	0
NM_173378	11.2165	11.0534	10.9825	12.1916	18.046	11.6424	12.2623	12.302	14.3095	12.4241	10.3589	13.5236	27.0385
NM_001145806,NM_130890	0.00441093	0	0.00571054	0.00548577	0.00537977	0	0	0	0	0	0	0	0
NM_144796	0.503093	0.581255	0.436311	0.501877	0.371143	0.759471	0.425925	0.662836	0.688921	0.292881	0.244127	0.986488	0.634256
NM_016928	1.04133	0.835376	0.801261	0.840922	0.71964	1.10025	1.2949	0.696945	0.542041	1.42167	2.08211	0.427075	0.46029
NM_181732	15.513	16.4752	15.6783	15.7328	18.96	14.8364	14.0658	15.1488	16.5971	13.8513	18.2151	16.2455	18.4169
NM_001277957,NM_001277958,NM_001277959,NM_021466	3.49272	3.85317	3.76462	3.69815	4.78818	5.4114	5.37032	5.01393	3.90153	5.32442	4.37289	4.02117	5.70899
NM_030175	0.0979943	0.0966677	0.0901077	0.0920612	0.118707	0.222618	0.207031	0.211587	0.261103	0.250468	0.235019	0.416869	0.297146
NM_022019	4.39922	5.72923	4.53874	9.78564	9.09153	11.1744	8.65253	7.12203	3.69016	16.7917	23.7747	28.4103	10.7005
NR_040627	0	0	0	0	0	0	0	0	0	0	0	0	0
NM_001163754	12.6749	12.4338	13.0662	12.9956	14.5284	16.5561	15.1027	15.739	16.8577	16.2212	20.6299	16.1018	17.6353
NR_034044,NR_035529	0	0	0	0	0	0	0	0	0	0	0	0	0
NR_029580	0	0	0	0	0	0	0	0	0	0	0	0	0
NR_029908	41.5981	53.9042	0	0	0	0	0	286.959	0	0	0	0	0
NM_011794	18.9475	19.6937	19.8342	21.7394	23.3329	11.5554	10.0765	11.4658	9.85649	10.3591	10.7907	11.3549	12.7552
NM_029735	102.799	101.997	95.4608	99.8251	97.5728	123.879	107.907	128.806	90.8499	134.678	114.656	123.062	95.8575
NM_001033286	3.29428e-08	0.00478318	0.00223252	0.0114034	0	0.0180759	0.0246947	0	0.0191221	0.040374	0	0	0
NR_033600	0	0.0211629	0	0	0	0	0	0	0	0	0	0	0
NR_030555	0	0	0	0	0	0	0	0	0	0	0	0	0
NM_033077	0.0186271	0.00995018	0.0118405	0.0129144	0.0187406	0	0.0191179	0	0.019677	0	0.0494255	0	0
NR_040554	0	0	0	0	0	0	0	0	0	0	0	0	0
NM_026367	7.00268	6.76803	6.87979	6.76552	7.33891	7.55324	7.7784	6.81984	8.29399	7.26255	7.00309	6.17442	8.90338
NM_001243792,NM_011935	0.0360422	0.0420886	0.0187895	0.0213803	0.0434078	0.0806946	0.0837481	0.0156254	0.0348401	0.082654	0.0704557	0.0563846	0.0368582
NM_021408	0.00135243	0	0.0007799	0	0	0	0	0	0	0	0	0	0
NM_008976	43.4932	41.6916	41.1476	43.5841	37.9146	37.356	34.0864	38.0404	40.1194	39.9144	32.3926	34.5136	37.9446
NM_001199020,NM_021421,NR_037578,NR_037579	13.5562	14.2108	13.6635	13.6052	12.5241	15.7864	18.4164	15.1256	20.1178	17.8523	14.1598	15.7363	15.6087
NR_027298	0.0529831	0.0175013	0.0296592	0.0621692	0.0385847	0	0.0504799	0.192638	0	0.0607469	0.0860497	0	0
NM_029336	0.116723	0.0489821	0.115892	0	0	0	0	0	0	0.30075	0	0	0
NM_198654	2.75669	2.3864	2.638	2.26726	2.3588	1.34457	1.73985	1.39296	2.0744	1.28996	1.37016	1.32077	1.2897
NM_030060	0.199302	0.219397	0.259379	0.198501	0.0808011	0.415162	0	0	0	0.129157	0.314479	0	0.125368
NM_025864	7.16293	7.33645	6.99682	6.69787	6.56957	5.28816	7.25697	6.00878	7.27795	5.6547	6.31008	5.40805	5.54731
NM_178632	9.56151	9.49105	8.15033	8.9513	7.3579	6.94268	7.34171	6.93685	8.38077	7.49468	4.34483	6.169	8.13904
NM_001134829,NM_172266	21.3861	21.9856	20.0464	21.0184	23.0395	27.9221	27.6745	25.2174	21.9944	30.5972	34.4751	23.07	24.8197
NM_010892	5.65866	5.79877	5.68368	6.20359	5.45472	3.98828	4.40966	3.04734	3.20845	3.79609	4.14389	2.65071	1.93559
NM_009579	3.99038	4.51188	3.71693	4.82738	4.76944	7.34271	3.34971	5.85228	6.13915	4.73776	4.55262	6.39332	7.7455
NM_001177900,NM_023727	0.0251548	0.0134918	0.0237985	0.00697013	0.00375495	0.0596799	0.0949494	0.0860403	0.146558	0.0704931	0.0683916	0.145153	0.01817
NR_033536	1.67116	1.81883	1.58137	1.69426	1.28808	1.26763	1.69108	1.36164	1.72101	1.50629	0.928131	1.13503	0.794037
NM_001038607,NM_010600	0.0598202	0.0469102	0.0473523	0.0445247	0.0405288	0.0372023	0.0559554	0.0635248	0.0226602	0.0425121	0.0114215	0.0154658	0.0318974
NR_040468	0.065723	0.0551606	0.251397	0.0702337	0.138289	0	0.429315	0.418269	0	0	0.412326	0	0
NM_016851	0.32559	0.253055	0.310358	0.247109	0.265424	0.683143	0.892801	0.29325	0.239847	0.709024	1.29427	0.293023	0.199669
NM_001160359,NM_001160360,NM_181048	2.05893	1.86969	2.0885	1.73255	2.31997	1.19287	1.68426	1.40893	1.45946	1.11489	1.43714	0.95906	1.42253
NM_001277928,NM_008484	0.407859	0.422618	0.379219	0.478247	0.377856	0.325199	0.650859	0.228867	0.342243	0.356096	0.728857	0.181552	0.344993
NM_008882	4.99387	3.93604	4.02616	4.15889	4.71496	5.65929	9.26063	6.2339	4.25029	7.10088	5.67557	6.14334	6.87744
NM_001111059,NM_133654	22.9405	24.1283	23.9129	24.6027	41.8265	21.3572	15.4147	18.4753	15.8675	19.7238	18.5343	18.024	24.534
NR_015566,NR_029745,NR_029809	0.185098	0.222394	0.246396	0.147812	0.198523	0.480578	0.908322	0.344975	0.463295	0.643934	0.522511	0.370295	0.557855
NM_001011874	0.930603	0.772934	0.721444	0.834044	0.588023	1.28458	1.84246	1.38751	1.35662	1.21431	1.65043	1.67353	0.803191
NM_001195662,NM_011283	0.011136	0	0.00378494	0	0	0	0	0.0280275	0	0	0	0	0
NM_011441	0.00332324	0	0	0	0	0	0	0	0	0	0	0	0
NM_001177658,NM_025300,NR_033530	10.0368	9.55479	10.3226	9.28245	10.9102	8.51961	6.6133	8.67665	7.43217	6.76393	7.63799	7.63941	8.03037
NM_001177795,NM_021374	0.314035	0.210186	0.301861	0.302623	0.934378	0.0356096	0.039503	0.286773	0.214069	0.132941	0.150308	0.0730368	0.64572
NM_010342	0.0191202	0.033542	0.040393	0.0317818	0.0192445	0	0.0329586	0.0283118	0.0169612	0.0184858	0.0602962	0.0214194	0
NM_027671	0.137943	0.192292	0.133195	0.197192	0.111691	0.0904585	0.0553677	0.0399095	0.0242025	0.19866	0.0196712	0.17641	0.015684
NR_015470	0.080973	0.0680344	0.0584699	0.0490918	0.148936	0.0501209	0	0	0.0572268	0.110081	0	0	0
NM_008651	4.83781	5.44055	5.23057	5.48817	5.1053	6.78887	5.17935	4.07894	6.58475	7.82115	5.4445	5.70956	3.04187
NM_173443	12.3647	12.4812	11.8516	12.0387	14.1724	16.4768	14.2948	15.5921	15.7373	18.2561	16.3885	15.0921	18.2523
NR_024067	154.348	175.623	171.215	176.158	171.681	121.524	100.953	137.59	150.394	104.409	102.157	151.002	117.675
NR_004410	0	0	0	0	0	0	0	0	0	0	0	0	0
NM_027033,NM_145692	0.0572203	0.0524268	0	0.0534644	0.0207078	0.178322	0	0.0665644	0.184263	0	0	0	0
NM_001277101,NM_013715,NR_102282	57.5596	60.6511	58.8546	60.3964	60.6896	54.7384	55.9289	56.979	46.5008	52.36	65.1801	54.9358	48.3159
NM_001102430	18.9562	19.2855	18.4663	17.6077	20.4972	24.3409	23.2819	20.2037	22.6849	26.4161	23.605	19.5835	21.7484
NM_177834	11.1435	11.702	10.4177	10.9532	10.3684	12.866	14.1996	16.5302	13.1442	12.7848	12.6599	17.6489	11.2274
NR_030645	0	0	0	0	0	0	0	0	0	0	0	0	0
NM_172841	0.233304	0.234073	0.242925	0.215273	0.276205	0.21088	0.37852	0.112158	0.129129	0.182326	0.410087	0.0883912	0.184378
NM_001081209	0	0.00440167	0	0	0.0114865	0	0	0	0	0	0	0	0
NM_001077695,NM_008678	8.6349	8.31891	8.11915	8.31803	7.09648	10.2457	11.2813	9.11588	11.3556	10.7373	8.73137	7.44386	7.80045
NM_028173	50.8867	54.3703	54.716	53.6166	60.7864	59.1717	56.5922	59.0617	54.6623	50.1638	64.5184	59.6022	55.9846
NM_145381	21.0479	23.2244	21.745	22.6888	20.5955	30.2346	34.0254	21.3922	15.792	36.5796	32.6206	21.6644	11.2002
NR_004447	0.00940061	0	0	0	0	0	0	0.0955236	0.0934223	0	0	0	0
NM_001252192,NM_010164	16.3828	18.2354	15.8793	17.71	14.5388	20.5164	20.0177	15.3214	14.876	22.0202	12.3077	14.8074	8.83229
NM_010827	0.271886	0.333002	0.285143	0.329999	0.215545	0.206271	0.25505	0.052833	0.117758	0.213903	0.13954	0.0495698	0
NM_177781	0.0255195	0.0210532	0.0231214	0.0358319	0.0477375	0	0	0.0196098	0	0.0158787	0	0	0
NM_001033288	3.65239	3.12334	3.10965	3.08048	2.49811	5.73079	7.6156	3.34554	3.54979	6.12419	6.83632	3.90793	2.39113
NM_001243238	0.0192732	0.0743014	0.0669675	0.0265171	0.0235138	0.102758	0.438173	0	0	0.481434	0.155676	0	0
NM_011291	235.702	228.78	229.588	231.495	229.225	238.185	219.666	281.073	295.668	223.491	234.767	300.103	278.768
NM_001111272,NM_025303	6.64854	6.89265	5.8959	6.54985	6.92088	7.09202	7.84656	9.56903	7.17279	6.66075	8.63702	8.8338	7.7242
NM_001271016,NM_001271017,NM_025773,NR_073122	19.2263	20.8173	19.3073	20.2796	21.1355	23.2852	21.859	20.0041	22.6856	23.4186	27.404	22.4632	19.8972
NM_026456	76.5619	86.6627	82.8882	84.1107	95.1579	82.8186	81.1336	73.1652	64.288	81.6722	96.0077	83.5596	67.4777
NM_020604	2.01057	2.5028	2.094	2.47996	1.72229	2.65317	2.19274	1.42658	1.56318	3.41978	3.85188	1.90971	1.23037
NM_030033	0	0	0	0	0	0	0	0	0	0	0	0	0
NR_002879	0	0	0	0	0	0	0	0	0	0	0	0	0
NM_001039123	0	0	0	0	0	0	0	0	0	0	0	0	0
NM_001040027,NM_183124	0	0	0	0	0	0	0	0	0	0	0	0	0
NM_153179	0.0712804	0.0627842	0.0543581	0.059023	0.0464788	0.0442916	0.00640974	0.0357231	0.0244275	0.0812086	0.0288058	0.0175773	0.0122805
NM_145856	0.0201083	0.0263392	0.0241454	0.0125041	0.0582924	0.0536052	0.0594662	0	0	0	0	0.0772927	0.0647496
NM_008563	13.8098	13.7356	12.384	14.4957	12.988	8.7626	7.38244	6.98486	3.7527	8.31448	6.82258	6.43529	3.62156
NR_040492	0.0921477	0.037993	0.148949	0.167961	0.0569497	0.114076	0.153245	0.0876561	0.130249	0	0	0	0
NM_177409	21.499	19.2894	21.2009	18.2138	20.969	14.7137	15.4558	14.5543	21.241	14.6452	16.463	13.1465	16.8635
NR_002858	0	0	0	0	0	0	0	0	0	0	0	0	0
NM_001160139,NM_023872	1.40537	1.27154	1.36484	1.21663	1.41354	1.29831	0.887369	1.22895	0.662802	1.14942	0.863803	1.1541	0.907763
NM_001012623,NM_053270,NM_183018	0.720586	0.70713	0.625609	0.526235	0.384198	0.271248	0.498141	0.498396	0.389093	0.387545	0.291404	0.491469	0.347204
NM_001012624	0.617838	0.647312	0.658144	0.73014	0.549069	0.369732	0.359217	0.55964	0.422068	0.377553	0.492612	0.261851	0.506727
NM_025746	0.0147012	0	0.00684769	0.00769653	0	0	0	0	0	0	0	0	0.0598613
NM_001081079	3.48382	3.92581	3.53377	3.29492	3.3518	3.91892	3.73634	3.90878	4.44243	4.66438	3.2426	4.14648	2.6772
NM_028534	39.6852	40.9656	39.7525	41.3151	42.4833	41.6623	41.1399	48.8191	47.0812	41.195	47.0878	44.4887	51.8381
NM_026503	22.3145	21.1728	20.6117	20.881	18.2328	21.2653	20.4335	26.1367	22.1205	18.3099	18.425	26.2242	23.0294
NM_026604	11.2191	12.3214	10.6604	11.5279	12.0754	16.4063	17.9259	14.2843	14.557	19.1994	16.7615	14.0566	13.7426
NM_007733	0.531884	0.601577	0.508523	0.602977	0.413465	0.487051	0.494322	0.285679	0.300367	0.458111	0.313189	0.474304	0.272021
NM_175642	0.0226843	0.0216948	0.0341862	0.0140436	0.015039	0.0191418	0.0261509	0.0299166	0.0111134	0.0121123	0.0279149	0.0399266	0.0353174
NM_001204913	0	0	0	0	0	0	0	0	0	0	0	0	0
NM_001033764	0	0	0.00260443	0	0	0	0	0	0	0	0	0	0
NM_001013750	0	0.00559051	0.00458241	0	0.00926523	0	0	0.029761	0	0.0240985	0	0	0
NM_001081080	14.9101	14.1058	14.4124	12.8864	14.508	18.796	17.8795	14.8802	18.4883	20.206	15.8759	14.6755	18.2699
NM_011200,NR_002688	3.82364	4.55672	4.159	4.7203	5.31274	5.78012	4.66399	6.89503	5.0395	6.39158	5.27935	9.3954	6.44398
NR_033445	0	0	0	0	0	0	0	0	0	0	0	0	0
NM_001199956	0	0	0	0.00972192	0	0	0	0	0	0	0	0	0
NM_001164286	0	0.0033876	0	0	0	0	0	0	0	0.0181928	0	0	0
NM_008922	9.52406	9.75996	9.20111	9.62341	10.7179	7.59494	6.0999	8.42683	6.05813	7.25536	13.1119	8.01619	8.89763
NM_145392	65.5932	75.0718	69.894	77.1072	77.6788	84.5864	55.4429	36.6848	29.897	77.305	113.413	41.7862	37.7619
NM_133817	6.28806	5.91268	6.22346	5.4595	7.16422	7.80644	9.64455	7.38222	12.5576	8.02361	7.04478	8.22179	10.7135
NM_001161816	2.35412	2.12868	2.28963	2.23995	2.04719	1.83039	2.32076	1.62896	2.34325	2.03287	2.05049	1.76969	1.96133
NM_177235	2.07661	2.22031	2.41268	2.16961	2.18777	3.39976	3.52037	3.00368	2.6007	3.9281	4.29212	3.66684	3.3067
NR_039562	0	0	0	0	0	0	0	0	0	0	0	0	0
NM_027159	10.2252	10.4395	9.72287	9.70282	11.8286	8.38644	7.10208	7.03468	7.24071	8.32623	10.3068	8.34878	7.93685
NM_009356	0	0	0	0	0	0	0	0	0	0	0	0	0
NR_033627	0	0	0	0	0	0	0	0	0	0	0	0	0
NM_001160235,NM_001160236,NM_174997	53.1331	54.7847	52.5644	55.8081	57.7111	58.2107	48.7206	56.7016	53.8284	54.1668	55.2037	54.0942	57.2694
NM_198899	37.6554	35.8617	35.477	35.8785	36.1357	35.4232	35.3124	42.0101	40.6012	34.3177	35.2321	38.7876	40.5501
NM_153408	0.0589633	0.0536065	0.0490704	0.063074	0.0441331	0.130131	0	0.0335176	0	0.0958024	0.059017	0.0314474	0.0922568
NM_172652	15.9814	16.1477	15.3409	15.8536	16.605	16.7465	16.1424	19.1178	22.0048	18.3203	17.7288	18.9414	25.1683
NM_001013374	13.0581	13.4737	12.951	12.9981	12.9048	11.6114	10.118	12.5255	12.806	9.36655	9.69478	11.3881	12.4991
NM_153502	1.71105	1.83706	2.27169	1.51316	1.829	2.11922	4.87091	2.07749	3.61658	2.587	2.28331	2.8005	2.33247
NM_026241	4.5821	4.65628	4.69998	4.48432	4.00502	4.8832	7.27454	6.42375	5.58547	4.26626	4.46972	5.06629	4.78708
NM_001126047	8.56206	7.96448	8.70927	7.79675	7.26958	7.32679	10.0541	7.59268	9.97479	5.82441	6.76488	6.21501	7.42973
NM_001126046,NM_027957,NM_201365	0.0627778	0.140037	0.0465655	0.0731373	0.0737845	0.07008	0	0.197305	0.170789	0.0930703	0	0.153397	0.0430427
NM_146107	79.479	80.972	87.1047	89.3017	87.3887	71.5445	70.9368	69.8029	67.2834	70.1143	83.3204	69.5199	73.667
NM_018872	24.3475	23.4001	21.6978	22.6467	22.8594	21.6076	17.0347	23.2422	23.9659	21.373	18.8053	21.9137	22.6868
NM_198006	37.7216	38.5526	37.2695	38.5792	43.0589	35.5954	34.288	42.8153	38.0357	32.0522	39.1224	40.2754	42.9255
NM_173870	0.491107	0.495409	0.413002	0.446098	0.399936	0.397549	0.347607	0.444845	0.878559	0.493221	0.45491	0.513853	0.529528
NR_024017	0.0379486	0.039396	0.0427571	0.0187793	0.0358895	0.0610004	0.0320738	0.0387529	0.0758008	0.0253031	0.0275109	0	0.0245608
NM_028096	0.0647324	0.0810615	0.0929914	0.042381	0.254113	0.0373755	0.0865972	0.0428906	0.0232219	0.0465103	0.0357305	0.0538913	0.278489
NM_207228	0.542269	0.621251	0.478289	0.583675	0.529379	1.16704	1.29389	1.0528	1.35799	1.1682	1.14078	0.706729	0.90183
NM_026913	11.0637	11.1115	11.2872	9.33922	11.2177	9.04001	10.0929	9.68978	9.40106	9.64547	7.51009	9.60583	9.63001
NM_001033427	0	0	0	0	0	0	0	0	0	0	0	0	0
NM_027111	0	0	0	0	0	0	0	0	0	0	0	0	0
NM_172054	9.68122	10.3958	10.0128	10.0917	11.6224	10.6237	9.93072	10.1641	8.93359	10.4315	12.558	11.6327	10.3312
NM_019570	11.1252	11.5594	11.3132	10.4654	9.91797	17.5694	14.2981	10.8168	10.9062	18.0416	11.9888	10.2529	7.38396
NM_010678	6.12915	5.83622	5.23091	5.70449	3.10654	8.94222	14.1741	9.44524	6.34234	9.2316	7.47477	8.32793	3.45864
NM_001029878	2.03949	1.53249	1.67724	1.54294	1.58553	1.4222	2.18243	1.70728	1.32636	1.2646	1.20096	1.22288	1.29054
NM_145142	2.72088	2.46205	2.50727	2.25098	2.28973	2.47275	2.78508	2.67989	2.09441	2.40475	2.03642	1.86478	2.21437
NM_018775	2.33811	2.30285	2.20192	2.06626	1.28231	1.7992	2.57041	2.2319	2.42627	2.32491	1.60844	1.72935	1.16085
NR_028555	0	0	0	0	0	0	0	0	0	0	0	0	0
NM_001033135	21.6975	22.7947	22.9024	23.4015	33.7305	22.4683	19.7628	31.3501	31.6606	22.103	20.3432	33.8499	64.6772
NM_170597	0.0052051	0.00187483	0.0149583	0.0128007	0.0363403	0.00925061	0	0.0284328	0	0	0	0	0.0111738
NM_001145660	0.0844529	0.0678113	0.0990211	0.0774519	0.0432404	0.0578605	0.0456343	0.0889204	0.0330319	0.0635396	0	0.0834283	0.104834
NM_001177348	0.266639	0.184953	0.0737597	0.0817793	0	0	0	0	0	0.44227	0	0	0
NR_040465	0	0	0	0	0	0	0	0	0	0	0	0	0
NR_037980	0.110447	0.146343	0.109772	0.113292	0	0.0802514	0.215614	0	0.241213	0.176256	0.121578	0	0
NM_172499	1.87352	1.62053	1.84995	1.38249	1.91334	1.56921	2.78762	1.97085	3.41858	1.54616	3.10686	1.59814	2.65681
NR_040475	0	0	0	0	0	0	0	0	0	0	0	0	0
NR_027826	8.51805	7.16474	7.43392	8.16696	5.86904	7.40195	13.8337	12.5603	9.71683	14.0559	5.85636	12.8549	6.87118
NM_001013025	7.45796	7.51014	7.29943	6.8552	6.88161	7.92493	7.40251	6.98706	7.04697	7.40304	7.49495	4.88396	5.7473
NM_010212	69.5585	82.0032	73.048	90.6973	108.872	83.2545	49.8613	51.8873	48.6006	66.7779	74.1441	58.3852	72.8184
NM_026430	24.4122	25.3338	26.2776	27.1075	27.0867	22.2278	20.5739	19.2028	18.0743	17.7817	19.3902	22.2732	21.8807
NM_001013799	0.0794731	0.0532068	0.0530157	0.0700255	0.0707938	0.0592624	0.224964	0	0.178126	0.481556	0	0.0854497	0.0715829
NM_029368	4.83907	5.66056	5.12199	4.74393	6.73308	5.31979	3.47115	5.80322	6.53117	5.62913	6.5187	4.33736	6.20905
NM_023645	24.0765	25.0665	23.6887	23.1883	23.0697	24.4993	28.2455	26.332	24.1733	25.7634	21.0436	28.4316	21.3983
NM_207281	0	0.00906211	0.00361398	0	0	0	0	0	0	0	0	0	0
NR_040602	0	0	0	0.0171846	0	0	0	0	0	0	0	0	0
NM_007737	950.593	966.104	962.645	976.898	932.588	891.206	820.586	981.83	1052.76	908.527	928.38	942.005	1074.04
NM_016917	5.23262	4.11739	4.31349	4.21749	2.90596	6.65593	8.5662	7.79618	4.65074	5.44406	3.74763	6.69468	3.60962
NR_037690,NR_037691	0	0	0.00738826	0	0	0	0	0	0	0.0204122	0	0	0
NM_172653	10.2556	10.3879	10.7101	9.82817	13.7189	8.60674	8.19744	10.3032	7.0799	9.4024	9.83004	9.97039	9.59085
NR_045151	0.0185495	0.0262207	0.0242176	0.0210277	0.0160894	0.0434605	0.104577	0.0679242	0	0	0	0.0453257	0.0400932
NM_028696	8.94918	9.51787	8.98289	9.77562	14.4131	13.4404	25.0332	9.5096	10.9076	23.5593	24.3706	14.8143	12.4367
NM_001161817,NM_010863	23.1608	23.0205	21.726	22.6941	25.35	17.9032	14.7953	22.7591	23.1472	20.6441	15.8268	21.4282	25.3675
NM_001081081,NM_001113383	42.5316	50.0272	49.0888	46.2472	54.8137	55.2901	68.1563	47.9157	59.4793	62.034	60.952	54.4077	52.6772
NM_008667	17.1374	19.1285	18.0328	18.4836	19.1967	23.9115	20.9115	18.4463	18.2454	24.7074	23.5856	19.885	14.8116
NM_133829,NM_178081	3.93669	4.05742	4.35905	4.03588	4.45211	4.58876	4.68774	3.22079	4.05732	4.31516	6.33002	2.43364	5.38002
NM_008384	21.9618	22.4341	22.709	20.4834	18.6536	25.0653	25.257	18.9245	21.7319	25.8623	26.6532	22.1606	13.2916
NM_144953	1.20961	1.38157	0.951818	1.11695	0.62742	1.31983	1.56774	0.799405	0.0951776	1.48284	1.98484	1.06311	1.00769
NM_027070	0	0	0	0	0	0	0.394866	0	0	0.274899	0	0	0
NM_153556	1.28234	1.44327	1.22284	1.1456	1.28599	0.963236	1.22602	1.01175	1.10725	1.4345	0.811154	1.17591	0.687551
NM_133728	28.8888	28.5307	25.8156	26.6842	26.2433	26.1674	28.1943	41.14	40.5766	23.7664	22.9971	41.355	39.1046
NM_001252070	0.00543463	0.00260509	0.000889205	0.00494297	0.00640392	0	0	0	0	0	0.00649101	0.0247115	0
NM_133810	6.03644	7.19603	6.02028	6.42296	7.41494	10.3461	6.38853	8.2754	8.19743	7.73982	7.27773	7.96578	7.12508
NM_001001883,NM_172655	1.08526	0.951546	1.04776	0.856128	1.18571	2.11646	0.738969	1.63605	0.80825	1.38593	0.966394	1.28475	0.507303
NM_001033194	12.6517	12.9368	12.1036	11.6934	12.2498	12.9385	12.8163	12.5616	13.6781	11.4254	11.8103	13.6164	10.8633
NM_001163314	1.25938	1.0617	1.04315	0.940771	1.00325	1.1273	1.44622	1.24437	1.54838	1.06982	0.87471	1.41195	1.00905
NM_001081433	7.83115	7.85407	7.92638	8.18865	4.48191	8.97302	10.6963	11.2659	7.21777	9.26589	6.66326	10.8938	3.06072
NM_031179	45.65	47.6479	46.4934	47.0982	49.5575	57.5648	73.4543	64.607	59.2693	71.3897	52.7523	75.9032	52.7516
NM_010477	74.6221	79.9401	75.3536	75.709	96.8812	65.419	53.346	59.0263	48.103	62.0408	68.3217	60.8362	59.2091
NM_028713	7.46834	7.83222	8.21593	7.49732	6.86258	8.22734	8.77014	10.1279	8.70538	7.47598	7.64838	8.45128	5.9354
NM_001113367,NM_029267	0.014072	0.0364735	0	0.0147342	0.0320974	0	0	0	0	0	0	0	0
NM_027661	0	0	0	0	0	0	0	0	0	0	0	0	0
NM_139146	12.1778	12.353	11.4468	11.7692	10.732	8.27254	7.9343	7.25342	8.35479	8.81696	6.65765	7.40106	5.66949
NR_037990	0.00403767	0	0.00347012	0	0	0	0	0.0318671	0	0	0	0	0
NR_037999	0.327581	0.268343	0.21018	0.296411	0.243417	0.16867	0.0935558	0.107154	0.22139	0.316932	0.161246	0.138725	0.067912
NM_001037742,NM_001114102,NR_004860	10.0951	11.9297	11.4683	10.668	10.9543	15.9371	14.3327	11.5163	10.206	16.8777	12.7586	12.321	7.9813
NM_001159864,NM_001159865,NR_027630	6.40152	6.09121	6.28743	5.71465	5.22596	5.47217	8.90332	7.37646	9.97838	7.00443	5.23906	7.36974	7.19153
NM_001042634,NR_027853,NR_027854	27.3899	32.4521	28.1393	31.5257	26.1069	57.6405	73.956	96.9405	89.4927	75.3432	39.5838	130.935	48.6721
NM_027351,NM_027374	32.2375	31.4208	32.7311	30.9289	33.776	28.6685	29.8582	25.082	26.128	23.958	26.4121	29.0057	21.0679
NM_001025378,NM_001271526,NM_008765	11.2308	11.5548	10.6755	10.2837	16.018	10.3633	9.46435	9.14768	9.17979	10.2347	10.1617	10.6175	12.1382
NM_172513	1.60707	2.21292	1.5464	1.74366	2.30528	3.25881	3.238	2.9031	2.71969	3.08067	2.05296	3.05559	3.2694
NM_175370	0.0284625	0.0394859	0.0348051	0.00979004	0.0937947	0	0.042086	0	0	0	0.0513296	0	0.0458253
NM_172406	12.2723	12.5354	12.3409	12.9088	16.5896	14.0191	13.4544	9.47778	12.4695	16.2214	18.113	11.6228	17.608
NM_175200	0	0	0.00559373	0	0.020983	0	0	0	0.0307744	0	0	0	0.0977987
NM_001033449,NM_001037812	12.108	12.5994	12.2384	11.0555	13.3509	11.246	11.862	11.7243	13.5691	10.6333	10.8359	12.1864	12.5331
NM_001159948,NM_001164682,NM_028717,NM_145143,NM_146109	6.78953	6.91615	6.95232	7.28384	7.95673	8.08038	7.02651	5.05952	4.62422	7.92323	6.86028	4.42304	6.68419
NM_009460	28.9877	29.4057	28.6619	29.7256	33.4682	27.718	22.8313	26.2676	27.0783	26.7066	29.1591	34.2894	26.9557
NM_027407	0.875074	1.26634	1.15922	1.03752	1.20356	1.14377	0.589311	0.379924	0.367878	1.1195	0.90318	0.748754	0.254495
NM_001199060,NM_001199061,NM_021312	6.62561	6.77722	7.12299	6.76045	9.25707	5.81441	4.68605	6.10986	3.76285	5.38505	5.1654	4.75462	5.57035
NM_001045513	6.83412	7.09272	6.20114	6.8175	8.46789	6.49266	6.1538	7.49164	6.30316	7.27867	9.83089	8.26362	6.70565
NR_040601	0.220411	0.153868	0.233682	0.129069	0.132715	0.149246	0.44331	0.405899	0.369719	0.427793	0.102678	0.311302	0.32128
NM_001081436,NM_001114609	3.34972	3.19855	2.92368	3.13922	3.31068	4.1342	4.49581	3.62499	3.89158	4.18878	3.47798	3.68318	4.1388
NM_001160038,NM_001160039,NM_001160040,NM_145518	40.7444	42.9435	40.4594	41.4603	41.831	46.036	44.265	45.6122	35.1858	42.9921	47.3768	42.8087	35.9181
NM_146250	0.380964	0.414587	0.440719	0.427899	0.603249	0.477607	0.18209	0.114093	0.0423831	0.369541	0.319378	0.16057	0.0673452
NM_001081658	0	0.00473188	0	0.00537228	0	0	0	0	0	0	0	0	0
NM_029696	0	0.00799794	0.0165513	0.00794221	0	0	0	0	0	0	0	0	0
NM_001256158	0.0413229	0.0523675	0.0450701	0.0317782	0.0313674	0.0994077	0	0.11536	0	0	0.0507648	0	0.0404752
NR_035484	0	0	0	0	0	0	0	0	0	0	0	0	0
NM_033563	12.2202	14.5328	10.5621	17.1997	10.4129	14.3306	9.72328	8.65795	8.68456	18.917	13.4155	14.2385	8.60041
NM_025964	10.8334	10.6035	10.6932	10.1399	10.1673	10.8559	12.0032	9.96154	10.4042	8.5473	8.21198	10.9495	9.52533
NR_038009	2.65961	2.86698	3.0334	3.33468	4.09979	2.67585	2.86734	1.22899	1.24536	2.16868	2.35978	3.61803	3.69368
NM_001042659,NM_022721	5.29472	5.61466	5.49798	5.10739	5.00791	4.25123	3.4072	5.17051	5.19591	3.48517	2.97931	6.22446	6.37041
NM_001039493	2.33312	2.29831	2.29861	2.32568	2.07982	2.23309	2.21778	2.21923	3.38515	2.16512	2.10643	1.97205	3.17156
NM_027582	0.0109553	0.0105123	0.0214703	0	0	0	0	0	0	0	0	0	0
NM_007777	0	0	0	0	0	0	0	0	0	0	0	0	0
NM_007776	0	0	0	0	0	0	0	0	0	0	0	0	0
NM_001082573,NM_007775	0	0	0	0	0	0	0	0	0	0	0	0	0
NM_144761	0	0	0	0	0	0	0	0	0	0	0	0	0
NM_007774	0	0.0559977	0	0	0	0	0	0	0	0	0	0	0
NM_175293	0.0269891	0.0296854	0.0530761	0.0385709	0.0411531	0.0525624	0.153522	0	0.0489866	0.0654089	0.035558	0.0378945	0
NM_001111320,NM_010497	107.54	112.732	111.707	109.259	95.3116	121.006	134.501	83.4349	66.1697	112.989	117.555	80.6238	51.1897
NM_001122738,NM_177645	3.36747	3.39423	3.13676	3.25614	2.11403	4.6894	4.47204	4.84572	5.59636	5.52748	3.00812	4.6631	2.60302
NM_007381	38.9626	38.9265	38.2934	39.7308	37.6651	37.1567	44.3378	37.0397	36.6928	36.4564	44.3383	38.8081	37.2739
NM_001113387,NM_021285	0.217674	0.318124	0.232366	0.216291	0.110781	0	0.0950781	0	0	0.401556	0	0	0
NM_001190984,NM_001190985,NM_021295	6.7414	6.72866	7.03685	7.26822	6.20717	8.44712	8.38202	10.3187	9.63874	7.66663	6.71249	10.498	8.89648
NM_010154	0.0702911	0.0672708	0.0822243	0.109945	0.100359	0.038337	0.0343337	0.0196389	0.0145908	0.0439688	0	0.0184259	0
NM_011770	1.22647	1.53699	1.31736	1.36346	2.0464	1.15181	1.70537	1.29981	1.71372	1.89006	1.60236	1.52823	1.68544
NM_007525	1.01962	1.08951	0.878534	0.988237	1.31361	0.551458	0.549404	0.551606	0.989687	0.705251	0.63673	0.592756	1.06753
NM_175210	0.0738851	0.0611626	0.0583079	0.0717384	0.0413074	0.081762	0.0271675	0.0513078	0.014549	0.0736925	0.0355125	0.0314405	0.0192546
NM_001276408,NM_001276409,NM_001276410,NM_001276411,NM_001276412,NM_001276413,NM_010233	1302.49	1155.36	1196.38	1240.86	1315.33	994.467	873.725	1492.68	1673.16	939.933	1072.42	1391.87	2106.06
NR_040454	0.03942	0.0374529	0.0142798	0.0270554	0.0281277	0.115618	0	0.0903493	0.109582	0	0	0	0.21332
NM_001005423	0.4707	0.424365	0.54956	0.488476	0.636758	0.692215	0.766701	0.599298	0.425234	0.645624	0.5962	1.0999	0.58915
NM_023523	7.05313	7.02926	6.63996	7.27013	7.30438	5.81497	5.09113	7.32858	5.59497	4.92444	5.65589	6.14619	5.11392
NM_001045533	0.0843036	0.0436383	0.0625638	0.0435513	0.185586	0.16645	0	0.119122	0.132108	0.118048	0.600197	0.0562516	1.55675
NM_176980	0	0.00342164	0	0.00305859	0	0	0	0	0	0	0	0	0
NM_010518	36.3763	23.7217	22.3745	22.8303	21.5323	24.0472	44.874	33.9843	19.4963	24.6154	31.5759	24.4914	19.4502
NM_009407	0	0	0	0	0.0608964	0	0	0	0	0	0	0	0
NR_003202	0.00927019	0	0	0	0	0	0	0	0	0	0	0	0
NR_045311	0.00610664	0.0131974	0	0.0158936	0	0.0640301	0	0	0	0	0	0	0.0393273
NM_027884	25.3593	22.8186	25.7634	24.6933	31.2991	19.044	22.7908	16.7902	14.001	19.4667	37.9575	16.1037	27.1074
NM_178241	0	0	0	0	0	0	0	0	0	0	0.076832	0	0
NM_001190444,NM_146110	86.5564	86.6977	90.1324	96.9953	90.9452	79.8169	71.0784	80.6637	76.9273	74.5786	84.2875	90.2986	103.704
NM_027154	110.274	113.504	118.742	127.91	140.011	103.564	83.7198	107.715	116.617	102.645	148.384	117.858	192.423
NM_176972	2.75312	2.73089	2.61693	2.41979	2.99386	3.33892	3.13923	3.41627	3.93279	3.87315	2.61395	3.05242	3.60418
NM_029888	4.56595	4.14299	4.35842	4.3904	4.70423	6.73869	4.69579	3.81463	3.95322	6.42403	5.93179	2.82237	4.66304
NM_021313	19.158	20.9212	20.0733	21.1656	21.5952	23.287	28.1112	25.2418	25.2874	31.0542	23.3578	28.6642	26.1526
NM_153744	0.224472	0.278514	0.233209	0.223258	0.212165	0.390755	0.455319	0.128601	0.0818524	1.04458	0.841482	0.275735	0.10732
NM_153111	0	0	0	0	0	0	0	0	0	0	0	0	0
NM_021541	0	0	0	0	0	0	0	0	0	0	0	0	0
NR_029876	0	0	0	0	0	0	0	0	0	0	0	0	0
NM_001039495	0.00176057	0	0.00227998	0	0	0	0	0	0.0174964	0	0	0	0
NM_010544	0.00516168	0.0288106	0.0165928	0.0273775	0.0110852	0	0	0	0.0696411	0.0508873	0	0	0
NM_029342	3.84666	3.80122	3.37862	3.8313	3.35381	1.94351	3.51534	2.5941	2.94954	3.26855	3.4782	4.27128	3.21318
NM_194333	0.0855408	0.0997066	0.162557	0.134092	0.135971	0.634175	0.309392	0.213611	0.276178	0.377441	0.0424498	0.776708	0.389425
NM_026977	23.8705	23.3534	24.7101	22.6243	20.2699	27.7132	29.2226	25.32	30.9509	23.5887	27.4412	25.2058	21.971
NM_023732	4.64118	4.70121	4.73665	4.84564	3.9657	3.97017	5.05825	2.51625	2.67959	4.36923	3.73172	2.68774	2.1474
NM_001003917	25.1402	24.2898	26.9971	26.4317	21.5589	23.9048	23.1506	24.6842	25.2653	21.9453	22.861	21.5116	23.607
NM_029010	6.12653	6.59823	6.05195	5.88413	4.91891	10.3777	13.9058	13.6092	11.5963	11.8689	8.11168	12.1611	8.95957
NM_009447	5.4183	5.08264	5.8625	7.10334	6.41102	8.71903	6.74241	3.29159	1.93277	9.84737	12.6096	4.3441	4.22886
NM_001243090,NM_001243091	0	0	0	0.0277812	0	0	0	0	0	0	0	0.244278	0
NM_008985	16.0821	15.0822	16.5468	17.1748	21.7394	12.1969	12.183	12.3558	12.1984	14.3817	15.935	15.0442	30.1425
NM_009049	0	0	0	0.0268915	0	0	0	0	0	0	0	0	0
NM_001110831,NM_016878	68.3373	66.4096	72.6267	72.4567	64.3972	61.2035	70.5496	57.2162	51.5271	68.2297	81.2439	51.2113	50.4279
NR_037976	0	0	0	0	0	0	0	0	0	0	0	0	0
NM_001001565,NM_001001566	72.9293	72.623	75.7445	79.2412	70.0021	65.9284	56.9567	87.3682	85.8203	63.6152	75.1232	83.8557	94.8561
NM_178884	17.2474	16.6121	18.8167	17.4566	15.2481	17.2551	22.5927	16.488	15.466	19.4199	17.6422	14.9505	13.0093
NM_007936	20.5752	19.9998	19.7731	20.0334	26.7776	17.4595	15.6779	19.8664	20.377	16.9157	16.6141	19.4896	29.9539
NM_001159520,NM_008781	1.48476	1.42236	1.74195	1.21363	1.18533	1.75119	3.19678	1.94153	2.27828	2.15352	1.86981	1.98286	1.38085
NM_001278075,NM_011811,NR_102757,NR_102758	34.6826	35.4111	34.16	34.5301	39.7474	25.6617	24.6321	27.304	18.5882	26.5468	27.254	26.7193	25.1836
NM_009129	0.1316	0.117123	0.112118	0.143323	0.0803137	0.0227512	0.240564	0.234975	0.162744	0.206529	0.168652	0.139989	0.164996
NM_183027	0.32102	0.318852	0.294657	0.234418	0.460863	0.290489	0.30716	0.304268	0.20532	0.333906	0.281467	0.235709	0.387156
NM_001111279,NM_027057	6.4776	8.73981	7.24754	7.72065	7.75203	21.4825	17.9586	12.2597	12.1942	20.7176	21.7374	14.5776	13.9208
NM_009255	177.011	172.414	170.89	176.411	169.371	174.049	163.836	240.37	220.04	151.19	186.257	229.045	219.315
NM_173425	0	0.0163846	0.0127158	0.00910272	0	0	0.0216451	0.0371868	0	0	0.0263991	0	0
NM_016716	47.3538	49.6518	46.6848	48.2153	53.1202	63.6114	53.9081	56.9603	54.4187	63.3684	60.4715	55.9399	57.8244
NM_175291	1.05543	1.01105	0.93642	0.949499	1.10634	1.29845	0.540175	1.30424	0.674161	1.35463	0.649543	1.84542	0.810513
NM_010570	19.7545	18.2844	19.1936	15.6457	17.9428	9.29079	11.6372	20.6016	20.1415	8.62456	8.63301	14.0589	11.6844
NM_007735	0.469983	0.509449	0.523421	0.42963	0.554579	0.290497	0.264625	0.169384	0.351745	0.442258	0.335001	0.235009	0.32075
NM_025453	0.0096802	0.00812449	0.00973687	0.0103446	0.0191792	0	0	0	0.0747198	0	0	0	0.0727276
NM_030556	0.310311	0.290816	0.268461	0.329766	0.244583	0.241484	0.325781	0.0932154	0.267815	0.444	0.161064	0.119371	0.079186
NM_172430	0.0352951	0.036295	0.0283349	0.0288502	0.0144064	0.0325394	0.178739	0.0847239	0	0.0924843	0.0497111	0.0673004	0.0495831
NM_001003948	35.6135	35.0911	32.3019	34.9566	24.3727	30.6265	18.6329	42.1493	28.4366	26.3193	11.7067	37.7918	15.6701
NM_152915	4.69279	4.91651	4.85993	5.12553	4.06677	3.7522	2.44459	4.07478	4.98653	3.01429	3.44351	4.7691	4.8232
NM_133975	37.9832	35.743	35.1354	34.0781	42.9305	42.5352	43.0726	44.1638	45.4148	47.5057	46.7652	40.8552	60.2238
NM_027921	0.0477757	0.0174987	0.0491776	0.033641	0.0294127	0	0.0650204	0.0833147	0.0451085	0	0.0694063	0	0
NM_213615	0	0	0	0	0	0	0	0	0	0	0	0	0
NM_001037909,NM_175219	0	0	0	0	0	0	0	0	0	0	0	0	0
NM_030194,NM_175397	0.0615604	0.0536842	0.0707091	0.049983	0.0757609	0.0901174	0.0336918	0	0.0346779	0.266994	0.0460212	0.193764	0.0551176
NM_177055	0.274589	0.143178	0.181552	0.1422	0.2049	0.385065	0.127948	0.424272	0.214637	0.404186	0	0.357685	0.145119
NM_001033290	0.00414844	0.00960779	0.0106061	0.0165047	0	0	0.0348888	0.042154	0	0	0	0	0
NM_008311	0.0427061	0.0539245	0.0538628	0.0810249	0.0568505	0	0.175463	0.0530003	0	0.122154	0.0797551	0.0570367	0.0504524
NM_010880	62.2992	64.6509	62.4913	62.7821	86.5518	63.1374	50.0776	58.5325	53.1668	69.61	57.6592	63.7273	66.4578
NR_028478	41.2776	20.3876	45.3106	0	0	0	0	0	0	441.871	0	206.32	121.507
NR_002851	0	0	0	0	0	0	0	0	0	0	0	0	0
NM_010341	0.0353612	0.0625053	0.0463664	0.0745867	0.0261515	0.10122	0	0	0	0	0.139274	0	0
NM_008801	30.9538	27.8113	28.1281	29.002	25.8991	26.4816	30.6727	30.9004	33.4581	26.8814	30.8495	33.2699	25.8239
NM_010933	0.0267774	0.0252985	0.0147685	0.0756897	0.06287	0	0.0692364	0	0	0	0.189106	0.512036	0.188619
NM_007433	0	0	0	0	0	0	0	0	0	0	0	0	0
NM_001081082	0	0	0.0057589	0	0	0	0	0	0	0	0	0	0
NM_001277925,NM_021306	0.0315843	0.0534113	0.0462047	0.0365717	0.110432	0.497628	0.0215638	0.148311	0.0805664	0.2435	0.302139	0.227579	0.270625
NM_001110227	0.059351	0.0659119	0.0423381	0.0880565	0.0689935	0.0455273	0.143629	0	0.051982	0.0566544	0.137945	0.0933772	0.0549923
NM_001111314,NM_019867	0.259047	0.213176	0.327432	0.301189	0.876583	0.404589	0.550692	0.0776262	0.0612097	0.0760273	1.35113	0.142268	1.47714
NM_001033291,NM_001198573	13.4776	13.3402	12.1046	12.6018	12.1674	13.2796	14.7166	12.9474	9.29105	14.7995	11.1025	11.9652	9.28995
NM_008299	3.31208	2.65349	3.12358	2.74967	2.96471	3.8313	2.95058	2.16807	3.31543	2.60995	2.80351	1.9591	2.41104
NM_172505,NM_198652,NR_040291	27.1344	28.7642	26.7973	26.0831	27.6548	18.1265	22.4224	17.5042	24.8386	22.5431	15.2691	16.184	23.0534
NM_008132	0.256344	0.247703	0.268829	0.327868	0.327403	0.118576	0.0328852	0.0455572	0	0.110668	0	0.0854868	0.0537816
NM_177305	11.3701	12.044	11.9099	17.6701	24.9553	9.3714	6.8854	8.27144	9.74529	12.1851	14.5046	13.9658	25.9133
NR_040482	0	0	0	0	0	0	0	0	0	0	0	0	0
NR_015540	0.00367275	0.006165	0.00315649	0	0	0	0	0.0289869	0	0.0334043	0	0	0
NM_010262	0.010137	0.0117387	0.0243444	0.0186544	0	0	0.0426267	0	0.0308548	0	0	0	0
NM_139152	0	0	0	0	0	0	0	0	0	0	0	0	0
NM_029122	0.0150826	0.0119686	0.0118484	0.0208593	0.0161431	0	0.0735355	0.0265025	0	0	0	0.0248656	0.0521174
NM_001243008,NM_001243009	32.2787	26.7025	26.3469	25.8481	35.0919	23.6955	21.3183	27.444	22.0679	20.9474	23.8637	20.0438	29.6669
NM_001159725,NM_008998	0.173607	0.12873	0.133998	0.119708	0.0996058	0	0.188449	0	0.0877261	0.250349	0	0.0553916	0.0464019
NM_023343	28.2853	29.2499	29.5064	30.5235	27.5662	29.1931	33.4549	31.3456	28.6259	28.4266	28.112	30.0333	25.1927
NR_026924	0	0	0	0	0	0	0	0	0	0	0	0	0
NM_019479	30.5584	28.4163	31.9878	27.1273	20.3331	20.6723	29.6107	22.3813	25.1242	18.9578	22.2572	19.3061	11.4222
NM_011066	0.742453	0.864045	0.725796	0.854812	0.909109	0.581903	0.401984	0.85294	0.547852	1.09572	0.393777	0.796731	0.588605
NM_207225	6.20235	6.04824	5.92807	6.49868	5.80297	6.17183	3.98645	6.68529	8.50107	5.42037	4.45714	6.19066	7.40674
NM_024197	68.7634	70.6178	71.5773	73.7322	65.6479	64.3048	56.1789	71.6544	64.7185	58.0469	59.9051	71.6514	69.6471
NM_147038	0	0	0	0	0	0	0	0	0	0	0	0	0
NM_001011525	0	0	0	0	0	0	0	0	0	0	0	0	0
NM_147039	0	0	0	0	0	0	0	0	0	0	0	0	0
NM_001163425,NR_028108	164.658	167.865	173.501	170.055	171.142	126.177	120.32	122.774	150.994	118.149	147.193	165.445	138.858
NM_153114	0.11007	0.0458216	0	0.0246059	0	0	0	0	0	0	0	0	0
NM_172850	0.0649072	0.0755154	0.0555529	0.0736253	0.0666537	0.151807	0.0996404	0.345008	0.153808	0.16482	0.0489196	0.0841742	0.144306
NR_015525	0.114032	0.0607909	0.201507	0.0511807	0.0425259	0	0.239923	0.0606448	0.0813292	0.0502767	0.110479	0.0652335	0.0528567
NM_001110315,NM_008440	25.3048	24.333	27.4789	27.8032	25.7635	25.5973	28.2818	13.2385	12.7449	27.6125	33.3393	13.926	12.0661
NM_001159940,NM_172411	0	0	0.0060236	0.0114911	0.00692583	0	0	0	0	0	0.0374903	0	0
NM_178051	3.42678	3.43806	3.46598	3.06652	3.55675	3.78594	4.00538	3.50607	4.39345	3.23952	3.47836	4.09132	4.3802
NM_080850	2.68201	2.49069	2.35248	2.22151	2.28358	2.0901	3.53508	2.5597	2.46554	2.47288	1.88778	2.10181	2.06233
NM_133808	182.979	178.469	182.958	179.773	182.169	228.625	219.416	233.852	203.322	244.256	245.699	233.595	219.178
NM_021537	44.1715	45.6221	46.3514	46.5109	42.5901	49.3394	54.6772	47.7218	47.0864	55.3183	50.4339	49.9941	44.5376
NM_025920	18.4635	17.1928	18.7525	17.7096	19.9799	14.3632	15.7224	16.4876	18.7435	15.254	16.1752	18.0851	24.2632
NM_001105667,NM_023136	51.6681	49.6	51.1807	51.825	52.8584	36.4022	37.4633	34.6818	32.8328	32.7123	36.05	39.7606	31.8545
NM_008798	0	0	0	0	0	0	0	0	0	0	0	0	0
NM_001159745,NM_009183	0.155297	0.120697	0.134771	0.119704	0.0732675	0.131077	0.207734	0.0647553	0.0113464	0.0762515	0.0661928	0.125765	0.088877
NR_040479	0	0	0	0	0	0	0	0	0	0	0	0	0
NR_040467	0	0	0	0	0	0	0	0	0	0	0	0	0
NR_040478	0	0	0	0	0	0	0	0	0	0	0	0	0
NM_172658	0.00444533	0	0	0	0.00661909	0.023701	0	0.0364238	0.0441773	0	0	0	0
NM_001039475	0	0	0	0	0	0	0	0	0	0	0	0	0
NM_028942	0	0	0	0	0	0	0	0	0	0	0	0	0
NM_133825	6.62209	7.18719	6.76744	7.32181	10.0659	6.82613	6.74384	7.41601	7.54661	5.85475	7.92464	7.19922	9.88366
NM_173760	10.2751	10.8159	10.0469	10.2496	10.8841	11.3865	12.7307	12.1431	13.2995	12.7375	10.0569	11.684	11.2328
NM_013626	66.4138	63.9352	63.8748	65.7332	62.9073	74.3803	69.7559	104.958	97.0686	72.8073	74.3665	100.599	98.2812
NR_037993	0.0598275	0.164409	0.0479549	0.0801707	0.0539981	0.159026	0.253669	0.184545	0.0612052	0.302173	0.0725271	0.231878	0.0647496
NM_001160368,NM_178779	0.58397	0.478673	0.616476	0.400445	0.383075	0.475505	0.586041	0.322956	0.415098	0.481533	0.378438	0.251396	0.190555
NM_013784	11.3428	11.7844	10.7205	11.2004	12.0628	10.1835	10.8454	12.3917	11.5909	10.0421	8.84009	11.9553	11.2456
NR_040630	0.10181	0.0316561	0.0739198	0	0.0793626	0.312389	0	0.24004	0.291137	0	0	0	0
NM_009741,NM_177410	2.08367	2.17478	1.81946	2.19604	2.60208	1.4039	0.255919	2.64507	1.80552	1.73122	0.303093	1.93541	2.39718
NM_027534	7.18087	7.23762	7.66765	7.39587	9.26898	8.17307	7.16234	8.93973	12.222	7.65805	6.1835	10.4094	16.3796
NM_009190	22.1025	23.8227	21.9841	23.0587	26.7755	24.7218	21.9866	24.492	27.3929	24.9632	27.2667	23.5709	31.0099
NM_009126	0	0	0	0	0	0	0	0	0	0	0	0	0
NM_201376	0	0	0	0	0	0	0	0	0	0	0	0	0
NM_198680	0	0	0	0	0	0	0	0	0	0	0	0	0
NM_201363	0	0	0	0	0	0	0	0	0	0	0	0	0
NM_001081386	0.400478	0.397321	0.303311	0.379009	0.317047	0.609437	0.249756	1.06362	0.371763	0.484798	0.453805	0.967198	0.571518
NM_001081316	9.47666	10.1531	8.9053	9.06339	8.91909	12.9512	10.793	12.9002	12.096	12.8372	12.1026	12.3827	10.5672
NM_011650	30.5013	30.2774	28.9445	29.069	32.3165	30.7949	30.2447	30.3595	24.2894	31.2982	33.5234	28.9604	25.9851
NR_027901	0	0	0.0328221	0.0348774	0	0	0	0.207429	0	0	0	0.276835	0.163035
NM_001081125	5.52148	5.05016	4.86477	5.00455	3.06275	4.72617	4.73028	3.40306	2.95111	4.79486	2.4526	1.79626	1.56752
NM_008381	2.97536	2.84958	3.46114	3.50391	4.41682	4.18585	1.95554	3.93008	3.54858	5.63168	10.1895	3.4428	9.01231
NM_022327	36.2309	38.3272	37.1745	39.6962	43.5231	44.4532	33.7186	28.7551	25.36	41.9622	50.9634	32.9301	37.5407
NM_001113416,NM_145506	2.37665	2.30904	2.28079	2.26246	2.17955	2.6107	3.2768	2.14925	3.23509	3.0554	2.4234	1.97751	2.1055
NM_019933	1.99586	2.0101	1.64449	2.03072	2.31538	2.3371	1.92387	2.01022	2.46472	2.46617	1.80613	2.10634	2.57165
NM_175106	2.38365	2.24474	2.4798	2.00845	2.24503	1.50287	2.05388	1.66447	2.18243	1.52493	2.46701	1.16343	1.67373
NM_001115074	0.0134489	0.00649355	0	0	0	0	0.0354813	0.0345684	0	0	0	0	0
NM_019432	8.75734	8.97249	9.54755	11.1577	15.6519	7.01044	4.63838	7.75451	5.04882	6.91605	5.28633	9.76918	14.7428
NM_001037999,NM_007830	261.966	287.953	282.196	290.883	275.155	217.913	193.723	153.969	157.592	201.035	230.268	168.159	168.083
NM_001085409,NM_133186	2.46897	2.74102	2.57999	2.28247	2.4804	4.45497	3.93025	6.67781	3.01178	2.82225	3.14671	5.42329	3.11001
NM_010766	0	0.00591301	0	0	0	0	0	0	0	0	0	0	0
NM_001271531,NM_001271532,NM_133748,NM_178082	16.3434	16.149	15.9357	16.1688	16.6624	16.2433	17.0745	13.7644	17.1233	15.0136	20.3372	17.5921	19.925
NM_010483	0.0538722	0.0901761	0.054346	0.0639948	0.229873	0	0	0.0443608	0	0.0359205	0	0	0
NM_025860	7.28635	7.97734	7.69632	7.23507	10.5438	7.05495	6.12708	6.58213	4.92802	6.85658	7.28052	6.30699	8.5929
NM_199021	0.00960154	0.0108308	0	0.00272907	0.00910814	0.0230086	0.0129787	0.0222978	0	0	0	0	0
NM_001205385,NM_001205386,NM_023735	102.613	112.209	103.86	110.61	124.354	110.858	95.3088	89.2455	74.7358	103.634	129.583	98.6394	86.7444
NM_145100	0.206784	0.123139	0.124095	0.128566	0.0260461	0	0.107174	0	0	0	0	5.72919e-05	2.78301e-05
NM_001081756,NM_172484,NM_176957	0.170806	0.179268	0.137567	0.183378	0.167713	0.312783	0.551862	0.547291	0.211816	0.463208	0.366748	0.480987	0.317409
NM_028135	0.00420789	0.00647663	0	0	0	0	0	0	0	0	0	0	0
NR_045298	1.25226	1.0222	1.63747	1.27827	1.67307	0.613646	0.229467	0.712118	3.04609	1.74134	2.05958	1.99527	0.999417
NM_011737	0.0273733	0.0208805	0.0186705	0.0196402	0.0141061	0	0.037295	0.0477884	0	0	0	0.0284705	0.0167671
NM_027678	1.32418	1.27906	0.999386	1.14328	0.763873	0.896924	1.17718	1.53006	1.5552	1.20188	0.761401	1.26438	1.14099
NM_001081078	0.0436162	0.0369215	0.0418903	0.0148189	0.0171268	0.0260406	0.0192585	0	0.0620913	0.0190643	0	0.0625793	0.0681719
NM_008567	19.836	19.9938	18.5546	19.9759	19.3155	13.7701	13.9912	10.8465	8.77402	13.8139	14.1353	10.9611	10.8977
NM_145507,NM_177445	42.6178	44.0822	41.3327	43.7492	47.7233	39.5226	37.8723	44.7236	31.61	40.0091	40.5692	44.7116	41.0512
NM_009911	0.198753	0.195067	0.130564	0.200419	0.138757	0.192685	0.362175	0.468546	0.180582	0.151301	0.146773	0.510211	0.253783
NM_007827	0	0	0.0113074	0	0	0.0915517	0	0	0.0867718	0	0	0	0
NM_010016	13.0703	14.1047	13.1258	13.9442	11.2575	19.2962	21.7825	18.5057	16.5892	21.6506	26.0212	19.1226	14.0594
NM_009581	0.00685555	0.00819566	0	0	0.0158571	0	0	0	0	0	0	0	0
NM_007576	0.381722	0.179132	0.212048	0.263388	0.253076	0.21361	0.146502	0.344467	0.141391	0.242509	0.31828	0.242052	0.149728
NR_028304	0.017952	0.0193985	0.0198641	0.0740981	0	0	0	0.294188	0.684664	0	0.145004	0	0.289262
NM_001162415,NM_001162416,NM_008825,NR_027859	4.7369	4.62828	4.77882	4.90415	4.14659	6.55817	8.01226	5.5192	7.01998	8.13396	5.12609	6.89198	4.07025
NM_053095	0.0138346	0	0	0	0	0	0	0	0	0	0	0	0
NM_021380	0	0	0.0205794	0	0	0	0	0	0	0	0	0	0
NM_001009940	0.0142308	0.0554962	0	0.0329683	0	0.0638788	0	0	0.119066	0	0	0	0
NM_008551	63.0341	69.3981	65.6019	71.874	69.3726	64.6641	54.4154	64.7627	59.8539	62.8763	71.8943	67.22	66.4441
NM_145508	2.71989	2.73062	2.85572	2.83878	5.31	1.74269	1.49574	1.34032	2.17975	1.49218	2.63801	1.25653	4.31937
NM_018750	6.42281	7.259	6.46669	6.80096	10.7058	5.41106	3.81155	5.70647	7.21826	5.0706	5.01615	5.21426	10.8117
NM_019777	5.83248	5.74672	5.63849	5.94732	4.48506	5.71051	7.53437	7.00716	5.63465	6.80034	4.2316	5.84043	4.19938
NM_001081011	10.5557	10.82	10.6046	10.0182	9.8966	9.87607	10.757	10.8566	12.8507	12.0321	10.3011	10.2968	11.5056
NM_001114662,NM_172510	1.90122	2.03314	1.85331	2.14617	2.75679	1.77245	1.78631	2.10488	2.65098	2.58954	1.94822	2.37087	3.41831
NM_008795	6.17408	5.47101	6.39065	6.17018	12.3023	4.0653	4.83683	5.32068	4.62546	6.0008	8.09909	5.24805	13.5613
NM_178874	19.7414	19.6834	20.9304	21.3334	15.9165	16.7202	16.6498	13.1949	16.0094	18.1704	22.1687	13.0999	12.7209
NM_177129	0.631377	0.659713	0.590301	0.634444	0.41692	0.763408	0.944332	0.493074	0.686139	1.00224	0.871551	0.454516	0.633439
NM_001160316,NM_001160317,NM_001160318,NM_182716	0.0454324	0.0517928	0.034097	0.0420606	0.0401551	0.0281486	0.0597684	0.0503282	0.0297744	0.024215	0.00852682	0.0162336	0.0544278
NM_008575	10.5128	9.97349	9.31683	9.05008	10.141	13.8216	19.8576	13.1618	15.1611	18.7443	12.2045	14.713	11.2938
NR_037984	0	0.00413112	0.00421869	0	0	0	0	0	0	0	0	0	0
NM_011439	0.917584	0.835765	1.01656	0.835686	0.964854	0.632904	0.671477	0.625295	0.998065	0.838107	0.49139	0.512114	1.44046
NM_009227	67.314	68.8959	68.7217	74.3602	73.3124	49.0723	48.054	48.2523	53.4191	51.1678	58.2879	68.3751	41.6914
NM_001276767,NM_144530	41.9694	44.0091	40.3056	41.7393	48.9125	53.2431	44.3616	43.0177	43.8669	57.7698	47.798	43.5723	48.3292
NM_001166552	22.9043	21.851	20.6016	21.4714	24.1802	28.3552	25.6571	23.5613	25.2687	32.3797	29.4966	24.1884	28.3018
NM_001159649,NM_172842	0.202016	0.237674	0.264039	0.25368	0.19628	0.693404	0.225737	0.546113	0.782894	0.637469	0.709861	1.08711	0.2275
NM_001167949,NM_213616	11.5247	10.4603	10.6043	10.2666	10.2938	14.5918	11.333	15.3748	13.5103	15.0669	17.6493	13.773	11.4636
NM_001160420,NM_001160421,NM_001160422,NM_054076	3.69116	3.16439	3.3242	3.46676	3.24143	2.80638	2.7412	2.79039	3.70413	2.58224	2.88586	2.85688	3.23504
NM_054077	19.5628	18.2953	16.6081	16.5184	12.6637	16.4324	9.95184	25.2747	18.5539	15.8833	15.4697	22.6758	17.8671
NM_007570	31.191	40.0503	32.0192	76.4218	38.8103	43.8942	24.8689	46.4245	32.3093	116.541	54.1564	189.695	50.5034
NM_001008533,NM_001039510	0.229618	0.188592	0.232556	0.174622	0.398713	0.108608	0.281483	0.121807	0.0838372	0.159005	0.0956821	0.0469796	0.262583
NM_001144855	0.499732	0.516444	0.53561	0.56257	0.295914	0.725865	1.38853	0.570332	0.487042	1.3215	0.616151	1.05509	0.565474
NM_001042485,NM_020588	23.7475	25.4498	23.2322	25.0133	24.9902	24.7403	23.4687	22.0408	19.2848	27.3687	28.0629	24.2703	19.3578
NM_001145300,NR_026896	0.0370019	0.0318877	0.0720143	0.0790678	0.0125913	0	0.131147	0	0.0514769	0	0.186957	0.0650085	0
NM_001081307,NR_015606	4.38227	4.4546	4.04311	4.30174	3.22948	5.35175	4.74769	3.03441	2.85685	6.31549	6.63404	2.8122	1.61382
NM_001033409	0.141427	0.196335	0.197239	0.158061	0.41	0.270275	0.158409	0.0577698	0.119358	0.1753	0.145994	0.0747906	0.40311
NM_007955	2.95954	2.99431	2.95712	2.40927	1.7422	8.3437	6.65907	13.7052	3.36686	9.8169	3.25956	11.5914	2.91863
NM_134438	0	0	0	0	0.00632525	0.0498344	0	0	0	0	0	0	0
NM_001163131,NM_007921	0.0518633	0.05568	0.0542384	0.0354615	0.0230223	0.268405	0.132826	0.0459958	0.102541	0.111748	0.0858347	0.0431542	0
NM_001159624,NM_145417	23.2557	24.1581	24.4122	23.262	23.2059	20.2907	20.4598	16.6244	13.6969	19.6972	20.4709	15.2406	13.6183
NM_011590	56.2397	60.9653	60.8598	61.951	73.5354	49.3739	44.924	41.2519	34.5956	48.9231	70.5756	42.4328	47.3129
NM_175259	66.7381	65.3257	69.4851	68.7233	57.7344	64.4682	69.4595	62.1452	63.65	63.0791	66.0755	68.8976	57.6539
NM_153774	31.7177	30.8938	29.8091	30.9139	29.1168	32.3878	31.2765	35.0159	29.3147	33.2258	29.4186	33.831	27.8071
NM_173437	3.82241	3.10894	3.22384	3.05913	4.60443	3.05293	3.53555	3.43364	2.07328	3.32498	3.96019	2.36002	5.44839
NM_019645	0.195291	0.123097	0.229768	0.166409	0.959586	0.239457	0.294533	0.101857	0.117787	0.215134	0.332445	0.0918527	1.46926
NM_177642	0.0027312	0	0	0	0.00311141	0.0231389	0	0.0224241	0	0.0387621	0.00795951	0.012066	0
NR_046167,NR_046168,NR_046169,NR_046170	0.0332728	0.204942	0.0368236	0	0	0	0	0	0	0	0	0	0
NM_028872	2.3128	1.9839	2.7765	1.97379	2.61111	0.71559	1.14931	1.061	1.56774	0.92834	1.0099	0.648885	2.54359
NM_001101516	0.00714614	0.00599768	0	0.0068094	0.0221606	0	0.0466799	0	0.0889486	0	0.0848718	0	0.0536892
NM_001081360	11.648	11.1089	10.4773	10.7124	13.5461	14.5181	12.4821	12.4218	14.7266	15.9114	15.6669	12.6247	20.8524
NR_024328	0.111408	0.117797	0.102034	0.0787553	0.0776013	0.0539635	0.225076	0.377864	0.0824762	0.120532	0.0856106	0.039565	0.18236
NM_001159769,NM_030676	0.00566382	0.017915	0.00993412	0.00741724	0.0260246	0.0744901	0.0167464	0	0	0	0.0204263	0	0.0182351
NM_001111316,NM_001268286,NM_011210	0.063211	0.0298179	0.021214	0.0318139	0.039558	0.0204637	0.0164118	0.0319877	0.0118769	0.0815274	0.0456088	0.0363435	0.0125652
NM_021605	32.0798	32.2473	32.0273	32.1817	42.479	33.4455	33.3673	42.4851	45.9871	32.1938	31.0054	40.96	49.6221
NR_040304	0	0.0156695	0.0135627	0	0.00751601	0	0	0.0573867	0	0	0	0	0
NM_001025565,NM_001042577,NM_010714	5.89539	6.04043	7.44285	7.15055	10.0234	5.89455	6.95403	8.35125	8.304	5.0467	6.04236	10.7577	12.8211
NM_001081226	11.5191	11.5286	12.4332	13.0895	12.0136	8.92028	10.2412	10.8609	12.535	9.44526	11.5584	12.0189	12.3389
NM_133239	0.00215915	0	0	0	0.00321497	0	0	0	0	0	0	0	0
NM_015780	0	0	0	0	0	0	0	0	0	0.0747592	0	0	0
NM_001029977,NM_001160303,NM_001160304	0	0	0	0	0	0.0207098	0.0980164	0	0	0	0	0	0
NM_001025575	0	0	0	0	0	0	0	0	0	0	0	0	0
NM_009888	0.677894	0.636348	0.5792	0.616616	0.569161	1.22761	0.903761	2.19525	1.40654	1.18546	0.971147	2.02334	1.47436
NR_040604	0	0	0	0.0395883	0	0	0	0	0	0	0	0	0
NM_145991	18.6249	19.54	17.7954	18.067	22.5442	22.4029	21.4675	17.7338	19.625	20.3392	23.1793	17.1082	23.4198
NM_013835	9.12949	9.19823	9.07926	8.65649	11.2677	11.0325	10.3527	11.3822	13.8437	12.088	13.8092	10.8743	15.256
NM_009061	3.41338	2.81127	2.66946	2.51667	2.57656	1.45171	1.92155	5.68427	4.28441	3.76743	2.27068	6.13738	3.41849
NM_153171	0	0	0	0	0	0	0.0635286	0	0	0	0	0	0
NM_015811	0	0.0187684	0.0112466	0.0106542	0	0	0	0	0	0	0	0	0
NM_022881	0	0	0	0	0.00784046	0	0	0	0.0358636	0	0	0	0
NM_008869	22.0607	22.8876	23.2268	22.6035	44.55	25.9333	16.9565	27.083	20.2429	24.5678	28.4125	25.8371	45.2218
NR_015466	1.12679	0.931907	1.24757	1.38659	3.22485	1.73812	0.573516	0.761854	0.811791	1.31376	1.2432	0.949719	2.79151
NR_040603	0	0.0264569	0	0	0	0.256723	0	0	0	0	0	0	0
NM_001077237,NM_145511	14.5237	14.7651	14.2385	14.272	13.3253	22.1059	24.7614	24.8832	22.6767	25.0753	17.8479	26.8244	18.8275
NM_001110146,NM_021400	0.284636	0.344543	0.250237	0.250683	0.670067	0.311995	0.576442	0.536767	0.841182	0.504882	0.529698	0.445717	1.01045
NM_001024720	16.1024	11.5422	11.1934	12.4437	11.93	11.3223	13.6431	12.3219	14.2209	14.0091	11.5101	12.2073	15.4376
NM_025819	3.30162	3.07325	3.28329	2.73817	3.92559	4.21868	4.88127	3.72522	5.70969	4.54009	5.37944	3.65159	4.31172
NM_011277	28.737	29.8015	27.2092	27.9385	27.5378	33.6362	28.9442	34.4207	38.2377	31.9707	26.5347	37.781	30.6241
NM_197990	2.07853	2.12312	1.98399	1.94497	1.93163	2.1409	2.0612	2.06579	1.92126	2.18042	1.9649	1.63369	1.19451
NM_025677	10.2163	10.4647	9.81723	10.4475	9.44134	7.77573	8.29483	9.03549	7.26781	5.99166	7.07935	8.66746	8.60663
NM_016846	21.4477	20.8803	20.0162	21.1294	17.5907	22.1008	14.731	18.9526	19.6389	19.7227	11.2205	16.4212	15.2786
NM_001005507,NM_001160256,NM_001160257	12.6893	12.3957	11.7133	11.814	13.9888	14.7922	14.6546	11.3542	14.5785	16.1045	13.3715	12.4189	16.2318
NM_008485	2.91199	3.33786	3.25267	3.7937	3.79002	3.9592	3.48518	1.92621	1.82445	3.82027	7.01766	1.7529	1.93006
NM_010683	81.2406	76.7084	79.6594	77.9467	86.9772	70.3048	71.1044	78.195	83.8255	71.4729	82.7074	68.6231	103.161
NR_033736	0.0563287	0.0960742	0.0551969	0.0673887	0.0431277	0.0586593	0.021935	0	0	0.0492116	0.0535055	0	0
NM_007842	43.0003	43.184	41.2273	42.6561	49.0758	45.6106	40.9093	52.0836	46.1546	42.4033	45.4969	54.1724	53.9087
NM_028749	0.275123	0.242703	0.234087	0.248662	0.364937	0.259304	0.0482108	0.382059	0.211631	0.108162	0.117599	0.151799	0
NR_046171	0.00368562	0.00383346	0	0.00853839	0.0130262	0	0.0183527	0	0	0	0	0	0
NM_001243223	0	0.0100452	0.0103612	0.00698778	0.00797595	0	0	0	0.0281093	0	0	0	0
NM_178243	0.0313829	0.0488453	0.0159378	0.0259998	0.0261246	0	0	0.0551448	0	0.123462	0	0.073596	0
NR_040629	0	0	0.0613142	0	0	0	0	0	0	0	0	0	0
NM_009782	0.0167776	0.0241764	0.0140287	0.019085	0.0212628	0.0124161	0.0502897	0.0300238	0.0077143	0.0324198	0.0174692	0	0.0125077
NM_010500	25.0777	31.8149	28.3134	43.2659	40.9262	30.5046	17.16	20.6082	18.7014	36.4462	28.7477	54.3719	35.4155
NM_008209	4.22773	3.9827	3.76357	3.78369	3.49734	4.40877	5.38765	5.00054	4.7882	4.23069	3.73266	4.50468	3.44275
NM_011273	9.67991	9.5994	9.41362	9.10155	10.5979	9.11073	9.49835	11.1696	13.1996	9.8852	8.83163	11.1148	14.4394
NM_010712	0.0259037	0.0492775	0.0422564	0.0317982	0.0500813	0.124148	0.269184	0.120313	0	0.0693239	0	0.0455116	0.0572646
NM_001024945,NM_023268	122.201	124.09	130.258	129.799	131.538	109.797	104.051	124.465	133.015	96.5862	139.731	119.375	149.567
NM_001039184	4.99187	4.03997	4.20653	3.67571	4.55617	5.30752	5.83265	4.85664	7.01623	6.63754	5.86219	4.35234	6.60894
NM_001160018,NM_001160019,NM_144791	19.1745	19.4376	18.5549	19.5937	19.4505	21.5037	19.4007	22.5923	21.1899	22.8364	22.0974	21.829	20.9335
NM_177838	0.00839881	0.00325496	0.0100599	0	0.0078461	0.096924	0	0	0.0160388	0	0	0	0
NM_001134741,NM_001277730	0.0679284	0.0539711	0.0367843	0.0501486	0.0686478	0	0.0831961	0.0875372	0.0327664	0.0218745	0.0799031	0.0506963	0.0424686
NM_009230	12.4859	13.0858	12.5193	13.3153	19.6364	14.1826	11.1402	10.9592	12.3435	13.4778	17.3726	11.9858	20.9023
NM_023141	9.79918	9.83323	9.50556	9.52151	7.63684	9.99595	7.90236	10.0788	9.97495	7.94348	7.34572	11.7981	9.65196
NM_145413	20.4057	19.8876	20.2298	20.8866	23.2787	19.9876	19.5704	24.0795	23.3427	19.8114	22.2162	23.5067	32.4521
NM_001159965,NM_001159966,NM_001159967,NM_001159968,NM_023884,NR_027640	0.808994	0.656895	0.699578	0.564541	0.880971	0.880609	0.71026	0.715786	0.669013	0.803788	0.524186	0.698789	1.1729
NM_028540	0	0	0	0.035249	0.01886	0	0.119182	0	0	0	0	0	0
NM_177644	3.79566	3.43601	3.31872	3.32158	4.09488	4.55675	5.07768	4.09519	4.04679	4.67605	5.96093	4.05358	6.49953
NM_207583	0.0086639	0.00307994	0	0.00653052	0.0392211	0.078864	0	0	0	0	0	0	0.0562253
NM_001085376	42.5786	40.8744	37.8881	42.673	35.8724	28.2341	29.4245	27.9345	30.067	32.7323	27.5439	28.2939	29.9792
NR_038030,NR_038031	0.0942845	0.0963286	0.457736	0.231669	0.261653	0.227198	0.0651559	0.709717	0.0855506	0	0.451969	0.315661	0.817612
NM_177839	1.16265	1.23185	1.07497	1.22425	1.267	1.077	1.47142	0.484783	0.31693	1.56684	1.6561	0.339982	0.524539
NM_009786	37.5656	40.6053	38.6784	38.3911	45.6631	37.3239	35.1522	33.3713	24.5918	37.3923	36.8774	34.512	24.854
NM_001038621,NM_013862	6.41304	6.67406	5.93503	6.22285	6.83809	9.49154	9.11134	8.49059	9.24619	10.0404	8.66338	9.03704	9.05579
NM_001146330	0.08948	0.0806045	0.0835287	0.0565765	0.147041	0.177787	0.224964	0	0	0	0.0801811	0	0.143166
NM_173424	2.05639	1.79053	1.73747	1.69575	2.14718	1.73062	2.01494	2.25507	2.87553	1.80505	1.56968	2.18677	2.74032
NM_172644	3.06884	2.57765	2.66215	2.5733	2.27683	2.35387	2.57233	1.96213	2.91574	1.88267	1.43897	2.49793	2.17058
NM_001039482	12.6048	11.9073	13.0937	11.6043	11.5065	11.5844	15.3242	12.8269	15.1749	11.1151	11.7206	11.1519	12.3169
NM_001195189	0.0130986	0	0	0	0.0195037	0	0	0	0	0	0	0	0
NM_007453	91.8119	101.326	103.001	102.306	114.428	80.7478	61.4233	73.5881	73.6676	71.9501	84.3478	81.3945	79.9841
NM_001205243,NM_010177	0.00687365	0	0	0.015062	0	0.0308519	0.0973626	0	0	0	0	0	0
NM_172645	20.1807	21.1833	18.2082	20.4273	18.7371	23.709	20.6922	22.2025	21.8462	28.3512	23.6514	23.7201	17.7427
NM_001204904,NM_001204905	0.0456461	0.026217	0	0.0148826	0	0	0	0	0	0	0	0	0
NM_001038619,NM_172646	1.34269	1.2031	1.23252	1.17586	1.40537	0.983028	0.992373	0.976746	0.693662	1.19371	1.09878	1.24926	1.01054
NM_144877	7.26993	7.343	7.65232	7.19542	9.07856	5.77172	5.09572	5.38714	5.12765	4.92463	6.36442	4.02144	6.83635
NM_001177581	0.0455328	0	0.0203544	0	0.0244812	0	0	0	0	0	0	0	0
NM_001081290	26.3777	22.8909	22.184	22.2473	27.8549	27.0224	26.5077	25.3395	28.1835	32.0144	24.7157	24.5666	35.145
NM_144878	0.0214111	0.071255	0.0375703	0.0314634	0.0357205	0	0.0882544	0.0504815	0	0.113021	0.0497642	0.0673724	0.0396774
NM_010231	0.331601	0.308449	0.268626	0.224648	0.122783	0.681731	0.975741	0.562469	0.195529	0.236391	0.280649	0.482902	0.0886507
NM_018881	0.0350381	0.00670808	0.0152862	0.0152842	0.0203105	0.0650917	0.0367171	0.0885137	0.0497421	0	0.0501429	0.12569	0.0199897
NM_001178038	0	0	0.00738318	0	0	0	0	0	0	0	0	0	0
NM_008030	0.0364912	0.0466316	0.0325443	0.0414181	0.02898	0.114116	0	0.0884252	0.107248	0.0358005	0.0778485	0.100488	0.0347502
NM_030071	0.0158162	0.014172	0.018071	0.00433574	0.00431174	0.0370566	0.0924315	0	0	0	0.0285463	0	0
NM_001025570,NM_011127,NM_175686	239.997	242.512	244.559	233.673	248.026	276.646	281.316	301.428	263.869	273.307	291.052	280.445	256.914
NM_178883	16.9037	17.3592	16.7196	17.7494	19.6648	23.905	28.3913	23.1799	22.4424	28.3969	33.4847	24.7367	23.6493
NM_001143956	0.0137218	0	0.0145748	0.0317891	0.0140944	0	0	0.0946581	0	0	0	0	0
NM_201364	2.84171	2.65296	2.50433	2.49114	2.62945	1.72574	1.86923	1.99816	1.83453	1.61038	1.48066	1.64897	2.7901
NR_037987	2.30773e-05	0	0	0	0.000284553	0	0	0	0	0.0817103	0	0	0.117012
NM_001160208,NM_001160209,NM_025505	7.47728	7.88336	7.5597	8.31694	8.53277	13.1552	11.9372	9.98364	10.3725	14.4968	11.9794	9.86576	10.4099
NM_009721	34.4472	38.5956	40.2062	41.7504	64.5787	42.7043	35.8231	24.3375	29.6689	43.2704	67.8092	29.6837	54.8482
NM_008510	0	0	0	0	0	0	0	0	0	0	0	0	0
NR_040480	0	0	0	0	0	0	0	0	0	0	0	0	0
NM_032005	0	0	0.00438026	0.014703	0	0	0.0332924	0	0	0	0	0	0
NM_145512	15.8211	15.2716	14.9296	15.576	13.9735	13.7706	13.252	17.913	21.2677	12.7276	13.3355	16.2368	19.2025
NM_145513	12.5165	13.2454	12.4054	13.0906	13.9243	13.5343	12.7292	14.1761	13.6867	13.3402	14.5539	13.8854	14.9056
NM_028759	18.0015	19.414	19.4722	18.7437	18.068	23.9329	26.0753	21.047	23.2524	24.7264	25.8257	22.7641	20.5882
NM_001001880,NM_001083897	46.536	46.027	43.8626	47.9527	39.8415	40.0341	39.79	52.6335	44.234	35.6389	38.8527	47.4559	37.9714
NM_001038846,NM_178593	2.78302	2.46137	2.58647	2.27554	1.20622	1.59049	2.9081	1.58946	1.00753	1.9848	2.14261	1.22564	0.358753
NM_011137,NM_198932,NM_198933,NM_198934	1.27744	1.17869	1.10722	1.08295	1.36377	1.3073	1.29838	1.15676	2.00457	1.44888	1.07982	1.01339	2.60185
NM_001033344,NM_001160049	3.15812	3.52196	3.26424	2.77557	1.90151	4.02026	3.16761	1.69241	1.1334	3.84868	3.61948	1.33339	0.680427
NM_175296	0	0	0	0	0	0	0	0	0	0	0	0	0
NM_001142948,NM_175170	7.82261	7.56555	7.06026	7.45377	9.28565	8.60362	6.71195	6.03562	6.45563	9.28368	7.80395	6.27148	9.31771
NM_001164306	0	0	0	0	0	0	0	0	0	0	0	0	0
NM_001164312	0	0	0	0	0	0	0	0	0	0	0	0	0
NM_172844	0	0	0	0	0	0	0	0	0	0	0	0	0
NR_037988	0	0.0206636	0.017386	0	0.017867	0	0	0.136419	0	0	0	0	0
NM_030724	52.533	52.1071	54.881	56.4794	68.0112	33.5238	27.2001	33.891	26.0219	34.4958	51.9879	32.4446	49.8625
NM_025569	29.0073	26.0699	31.8201	34.3813	29.4389	21.6304	23.6687	22.3202	22.7185	25.0502	33.0029	20.5661	25.6004
NM_001013382	0	0	0	0	0	0	0	0	0	0	0	0	0
NM_008783,NM_183355	28.6949	29.0203	26.4993	27.8939	21.5542	26.9319	27.5424	32.3959	27.2972	25.5678	26.6949	27.2668	19.1395
NM_023284	7.47625	7.61126	6.28875	7.01951	7.06684	4.60397	4.70112	2.6413	2.71556	4.44509	4.78817	2.97495	2.06576
NM_009062	5.45365	6.2397	6.38799	6.91931	5.99095	50.8531	32.0221	12.1897	18.1229	48.4234	66.109	14.1757	10.5062
NM_010476	54.56	61.6553	57.2974	61.6867	67.4477	57.8746	57.3972	27.0689	16.3559	71.4984	70.5727	29.5217	18.7241
NM_022563	75.4672	73.7124	68.5009	73.4892	71.6657	74.8011	72.7494	74.3913	71.4234	81.4611	62.9097	78.7025	65.3189
NM_133806	28.6976	29.8454	30.7163	33.1147	40.423	35.0229	32.4753	24.3637	24.5622	43.7322	64.5206	31.6069	40.3121
NM_010633	17.4172	17.4088	17.6208	17.8969	20.5542	15.8784	15.4516	16.3032	16.9227	15.7379	19.8763	14.7724	22.6872
NM_001198955	0.396546	0.385264	0.333606	0.427101	0.323423	0.466828	0.832214	0.719693	0.855562	0.952118	0.387809	0.662453	0.655899
NM_001109985,NM_027528	0.365406	0.254597	0.117942	0.277567	0.149068	0.856324	0.499788	0.670425	0.541293	0.248093	0.291684	0.649315	0.464626
NM_001081304	13.25	13.5477	13.1695	14.1642	18.227	12.433	10.6435	11.9477	13.2669	12.553	16.3097	13.0696	19.1706
NM_023173	13.3942	12.8347	13.6309	14.313	14.135	12.8974	11.6007	12.0193	10.1323	11.2569	11.0956	14.2532	12.788
NM_001029984	0	0	0	0.0225301	0	0	0	0	0	0	0	0	0
NM_001160215,NM_145141,NR_027666	0	0	0	0	0	0	0	0	0	0	0	0	0
NM_001077189,NM_010187	0	0.00879226	0	0	0	0	0	0	0	0	0	0	0
NM_010188	0.141366	0.171947	0.223361	0.0888719	0.294962	0.586747	0.44509	0	0.258997	0.0564554	0.711939	0.0654146	0.109598
NM_025321	97.8787	98.8447	95.092	100.952	94.0855	67.9701	62.7746	74.6161	69.8858	60.3996	73.5546	80.1729	67.8882
NM_025557	0.237316	0.25695	0.272992	0.255359	0.19833	0.340426	0.505403	0.130704	0.401624	0.450239	0.205469	0.21048	0.0917179
NM_001037170	10.2255	10.7194	11.215	11.5351	10.0408	9.46456	10.6238	9.42439	7.27574	9.60222	9.7806	9.43888	6.5399
NM_010185	0.263968	0.424469	0.292402	0.271875	0.289215	0	0.31279	0.178916	0.398779	0	0	0.167865	0.140624
NM_153064	133.109	129.767	137.11	139.007	118.27	105.088	101.631	136.447	132.481	89.8681	98.5392	130.544	119.095
NM_008911	13.0617	13.9934	14.1611	13.2368	11.159	10.7562	19.3306	12.0951	12.8313	14.5772	8.76584	15.1356	8.74174
NM_013919	14.0728	13.4026	13.738	12.7396	10.8326	12.7853	13.843	12.9703	14.1635	12.0184	8.58393	11.4241	8.7938
NM_025388	58.5442	58.6732	60.4066	61.5044	58.0622	47.6201	49.0341	62.3582	59.986	46.1439	54.2937	66.7822	56.0471
NM_001242580,NM_012049	18.429	18.8146	18.533	18.6114	14.85	16.582	18.729	15.6449	17.7742	15.8611	12.4367	15.1953	13.7072
NM_001033039	2.06364	2.55558	2.17987	2.43993	2.53521	2.17833	1.09803	2.20057	1.10703	1.55139	1.75566	2.37805	1.5133
NM_010584	0	0	0	0.0130314	0	0	0	0	0	0	0	0	0
NM_001277968,NM_008534,NR_102726	0.0968233	0.146823	0.120263	0.101951	0.121794	0	0	0.0812309	0.0301744	0.0328868	0.0400376	0.0762137	0.0319218
NM_144539	0	0	0	0	0	0	0	0	0	0	0	0	0
NM_033509	9.68481	8.67879	8.93508	8.84548	7.00997	6.00438	6.11601	6.44742	6.33138	4.8841	3.68024	5.61921	5.52393
NM_010916	0.00506402	0.00526716	0.0154752	0.0282022	0.017898	0	0	0	0	0	0	0	0
NM_021607	102.771	102.968	100.666	104.571	98.7043	80.4148	76.1277	94.1207	88.9909	72.5179	84.8935	92.0444	89.919
NM_011063	76.3934	80.1275	79.4963	82.9422	87.7531	61.8715	59.477	56.7622	59.4228	67.9932	82.9819	61.7001	74.8534
NM_009813	0.493644	0.642118	0.53427	0.447461	0.444052	0.215807	0.550869	0.2985	0.293733	0.428389	0.27285	0.58849	0.282057
NM_013734	0	0.00686125	0.00655617	0.011345	0.00755709	0	0	0	0	0.0346912	0	0	0
NM_178405	0.0260696	0.0246151	0.015569	0.0152804	0.0138877	0.00859214	0.0271063	0.0163755	0.00981031	0.0106921	0.0130168	0.0352452	0.0518921
NM_008429	0.00376643	0	0.0122136	0.00788734	0	0	0	0	0.0315129	0	0	0.0346757	0.0204214
NR_040558	0.126847	0.0883936	0.160383	0.153399	0.068021	0	0.112131	0.109246	0.1325	0.17692	0.300051	0.102498	0.17173
NM_029084	0.0290586	0.0196385	0.0133914	0.00730199	0.0149657	0	0.0446345	0	0.0527429	0	0	0	0
NM_001164725	0	0	0	0	0	0	0	0	0	0	0.046046	0	0
NM_026725	4.93959	4.98112	4.80858	5.04369	4.71235	2.99239	2.27531	3.32445	3.45692	2.86763	3.2565	3.32256	2.05011
NM_011318	0	0	0	0	0	0	0	0	0	0	0	0	0
NM_146764	0	0	0	0	0	0	0	0	0	0	0	0	0
NM_146763	0	0	0	0	0	0	0	0	0	0	0	0	0
NM_010184	0	0	0	0	0	0	0	0	0	0	0	0	0
NM_001205011	0	0	0	0	0	0	0	0	0	0	0	0	0
NM_010045	1.10186	1.14583	0.977234	1.22068	0.648508	0.709809	0.684129	0.168253	1.04972	0.476842	0.933105	0	0.463115
NM_053199	4.19098	4.21403	4.04913	4.45974	3.91854	3.54432	3.86846	2.5965	3.01124	3.55963	4.28909	1.98086	2.92888
NM_001024721	0	0	0	0	0	0	0	0	0	0	0	0	0
NM_001177349,NM_001177350	0	0	0	0	0	0	0	0	0	0	0	0	0
NM_001204910	0.0279759	0.0210377	0.007119	0	0.0132417	0	0	0.240976	0.0294594	0.0543801	0.023944	0.0972484	0.0573479
NM_008329	0.249969	0.369815	0.224494	0.302026	0.510849	0.708427	0.0942511	1.10819	0.288093	0.621632	0.188073	1.16723	1.11108
NM_001170853	0	0	0.0126604	0.0148895	0.0520274	0	0	0.105007	0.0568533	0.0669909	0	0	0.110675
NM_001033450	0.647061	0.764626	0.498219	0.604341	1.56683	0.213345	0	0.426631	0.0821113	0.347449	0.266549	0.827329	0.369613
NM_001045481,NM_008328	0.00381215	0.0146346	0.0142231	0.00363248	0.0412039	0.311055	0.0498107	0.234918	0.147157	0.173398	0.0956836	0.259087	1.10768
NM_008327,NM_011940	0	0	0	0	0.0247716	1.67164	0.360639	1.93314	1.03691	1.57816	1.48725	5.29563	7.58474
NM_172648	0.031002	0.0565894	0.0507522	0.121513	0.0751782	0.072636	0.0409728	0.0567612	0	0.2082	0.497609	0.151507	0.156234
NM_001005520	0	0.0147522	0	0	0	0	0	0	0	0	0	0	0
NM_146715	0	0	0	0	0	0	0	0	0	0	0	0	0
NM_011825	4.71733	5.0385	5.0629	5.25497	8.54061	5.14167	3.41458	2.37207	1.70294	4.43985	3.3708	2.4021	3.53783
NM_001199003,NM_011880	0.183281	0.171352	0.168311	0.102467	0.164365	0.254984	0.178695	0.125884	0.0268684	0.108264	0.198698	0.0822037	0.142261
NM_010209	47.6331	48.1783	47.1744	49.9046	47.0636	40.0539	35.9561	42.5	41.1266	36.2756	37.4121	48.613	47.6561
NM_010098	2.01171	2.00597	2.28362	2.29551	2.61433	2.28502	1.77522	1.17059	1.82513	2.17509	2.65874	1.55794	2.88217
NM_021350	2.50533	2.57981	2.54933	2.56537	3.35117	2.81866	2.33534	2.1106	2.15	3.6796	3.72418	2.40787	3.75105
NM_001195816,NM_176916	0.420206	0.364164	0.409348	0.365489	0.309521	0.252149	0.348723	0.268776	0.28865	0.245573	0.227492	0.167859	0.276159
NM_001099637	20.2713	19.8835	18.9411	18.2702	23.5225	23.9781	25.1063	19.3343	23.3282	28.641	26.8671	16.5617	27.6867
NR_029775	0	0	0	0	0	0	0	0	0	0	0	0	0
NR_037996	8.44678	8.55426	8.09061	8.0859	26.5466	6.13866	2.62616	7.26253	6.42968	5.51339	4.40139	9.39953	35.8583
NM_011785	11.5977	11.9269	11.7106	12.0517	12.2476	14.1894	11.7847	15.9377	20.3166	14.2352	14.542	15.8855	20.0766
NR_037994	0.0257886	0	0	0	0	0	0	0.164122	0	0	0	0	0
NM_007422	43.3654	46.1315	44.1361	45.562	62.2276	44.5021	39.5339	48.7583	48.8292	44.4179	46.0686	59.5973	75.9491
NM_016805	120.614	122.238	121.202	122.568	146.812	129.397	123.777	118.383	113.656	140.96	129.998	137.103	147.079
NM_027188	2.16514	2.02372	2.13417	2.08584	1.68676	2.30626	2.10546	2.74368	2.31673	2.25956	1.75219	2.35667	1.56695
NM_008249	4.88621	5.18302	4.59092	4.82219	5.92387	4.33414	3.51864	5.04181	4.71154	4.49173	3.80594	4.3948	6.01041
NM_026375	12.6329	12.9418	12.0493	12.2697	16.7688	15.2887	12.8966	9.52274	12.5299	17.8448	14.9244	9.68873	15.81
NM_001163290,NM_023341	0.587757	0.636142	0.536676	0.558927	0.309697	0.541309	0.557788	2.26973	3.08614	0.460207	0.248715	1.61458	1.52983
NM_001128605,NM_011183	12.6545	12.5209	13.3323	13.878	11.1993	10.75	11.1518	12.9249	12.8346	10.1276	9.14365	11.864	11.6631
NR_003623	0.20648	0.221069	0.261855	0.21391	0.127947	0.228124	0.489413	0.346209	0.267449	0.230284	0.250746	0.205045	0.129819
NM_001081227	0.0207973	0.0150805	0.0241771	0.0119539	0.00796321	0.00814511	0	0.0375523	0.0092999	0.0357782	0	0	0
NM_013729	0	0.0108164	0.00604816	0.00572961	0	0	0	0.0474569	0	0	0	0	0
NM_008210	39.9269	43.3068	43.8082	41.8002	45.9161	43.0837	46.5186	54.1946	58.0104	41.4372	40.8661	63.2378	49.308
NM_010145	202.498	204.316	201.745	204.364	169.161	212.669	194.827	263.286	234.033	198.844	198.436	258.067	178.083
NM_026171	15.1854	15.7034	15.0654	14.489	16.9651	17.9482	21.6371	18.7956	18.6969	21.7119	16.4989	20.1628	18.6515
NM_145514	32.299	33.9051	32.7615	34.4943	36.3994	40.423	36.6918	42.7073	44.3686	40.9957	40.7236	43.1539	51.4126
NM_207280	0.0120763	0	0.00761782	0	0	0	0	0	0	0	0	0	0
NM_133815	15.5795	17.1561	15.3516	16.2858	20.3488	16.5311	14.7877	8.9966	10.1595	22.0484	15.8221	11.802	11.8509
NM_001083120,NM_001083121,NM_008680,NM_010135	31.8816	33.929	36.0466	34.0688	44.2724	41.8915	42.9111	28.7946	25.1878	43.2741	95.3967	27.2823	34.2246
NM_001166728	0	0	0	0	0	0	0	0	0	0	0	0	0
NM_007853	117.129	123.222	120.128	120.953	142.743	105.657	92.229	104.351	99.5841	89.3202	111.877	104.967	114.269
NM_175127	11.9959	12.3298	12.4386	13.4018	19.0067	12.947	10.7574	12.7851	13.9432	12.7865	12.8049	13.4455	23.703
NM_009794	148.233	149.969	155.528	156.073	191.74	137.626	107.994	137.481	114.312	130.163	163.708	135.741	179.389
NM_001033547	0	0	0	0	0	0	0	0	0	0	0	0	0.0509183
NM_001278218,NM_001278219,NM_001278220,NM_026866	17.1204	16.189	17.4349	16.6217	19.2042	16.904	24.3424	26.0051	27.6741	14.0342	15.9764	23.906	36.4103
NM_027861	13.4892	14.8137	13.6752	14.453	15.5996	16.7528	15.7832	15.3031	17.9429	15.6517	17.9276	19.2574	18.6841
NM_177389	32.6712	30.9706	30.9281	29.2921	32.4251	36.498	37.5608	37.5714	32.9642	43.2542	41.0978	33.5002	33.895
NM_028516	0.65815	0.975088	0.545884	0.837024	0.668293	0.475834	1.25862	0.73415	1.34487	0.643087	0.880178	1.04249	0.497395
NR_040472	0	0	0	0	0	0	0	0	0	0	0	0	0
NM_008250	0.963725	0.791107	1.02245	0.834931	0.995568	0.637056	0.72742	0.959683	1.03141	0.577263	0.811427	1.78424	1.14676
NM_001081361	0.0118241	0.0115276	0.0119534	0.00619024	0.00741131	0.0265377	0	0	0	0	0.0359051	0.130958	0
NM_133684	25.003	26.2273	26.6222	26.8413	23.082	25.7594	22.4899	25.0576	22.778	20.9292	22.5173	27.4879	20.7864
NR_035502	0	0	0	0	0	0	0	0	0	0	0	0	0
NM_178692	1.55951	1.43832	1.47325	1.69222	0.866754	2.51188	2.97282	1.23846	1.62402	2.11544	1.95684	1.77168	1.02942
NM_145515	6.15988	6.66151	6.39725	6.23236	6.5904	9.43283	7.4431	9.69001	6.26863	9.16397	8.35052	8.95349	8.33972
NM_198653	27.8276	28.2697	27.1008	28.261	29.3181	22.551	20.4439	24.0698	25.9363	21.4696	20.1568	23.2287	24.4078
NR_038006	0.00781728	0.00375059	0.00776162	0.0041769	0.0200087	0	0	0.0248751	0.0301701	0.055692	0	0	0
NR_040305	0.00451912	0	0	0.00466813	0	0	0	0	0.00412019	0	0	0	0
NM_146106	4.28831	4.19882	3.43463	3.91764	3.2738	5.55882	5.17487	5.17623	4.27525	4.65686	3.86064	6.42528	3.2304
NM_009367	30.0645	32.8222	29.733	29.4413	28.2404	31.9313	33.67	25.9037	26.136	34.6297	51.6032	25.3538	19.1466
NM_026041	27.4227	27.2152	26.1151	26.1602	37.3265	24.7188	15.5457	17.0616	11.4662	23.5575	21.7627	19.6484	25.223
NM_028848,NM_029067	0.0177996	0.125115	0.0568151	0.102545	0.0335605	0	0.243092	0	0.0689273	0	0.128401	0.0684187	0.143403
NR_038007	0	0	0	0	0	0	0	0	0	0	0	0	0
NM_172650	16.8604	16.9983	18.0057	18.1641	16.7527	16.6374	16.521	13.3012	15.5016	16.139	15.73	12.7846	15.8312
NM_001159850,NM_010607,NR_027627	4.93248	5.51313	5.46154	5.13323	4.31749	5.17894	4.6513	3.48535	2.70385	5.6739	3.40356	3.36343	1.67035
NM_001081363	2.30144	1.96258	1.8183	1.82143	1.89604	1.44441	1.8787	1.03275	1.46039	1.62436	1.18903	0.881916	1.37367
NM_026796	38.1747	40.1213	40.5652	42.0782	41.5455	36.4408	31.7883	33.3573	27.86	34.7856	36.4827	33.5929	34.9996
NM_008937	0.184909	0.146644	0.146878	0.242806	0.141822	0.10492	0.120762	0.348136	0.337244	0.103164	0.0755415	0.129982	0.334256
NM_178775	9.21419	8.98089	9.40205	8.93735	11.6485	8.68555	8.069	8.31563	8.45733	9.10196	11.7577	7.683	14.9897
NM_144879,NR_027352	11.3202	11.1291	11.6199	10.9304	13.1127	13.5143	16.8885	8.0365	6.75395	12.4549	21.9763	6.64101	8.24808
NM_001081259	3.82222	4.30643	4.29191	4.56025	5.30732	6.37553	5.64252	3.55341	3.0408	5.54773	5.2493	5.90781	3.85383
NM_001163421,NM_001163422,NM_026895	3.72254	3.7353	3.22912	3.13803	2.54887	3.48689	4.22931	3.58664	2.43278	3.79486	3.08998	3.7805	1.54146
NM_001109759	0	0	0	0	0	0	0.0283752	0	0	0	0	0	0
NM_007498	8.635	19.7688	7.06994	56.1043	7.77006	41.165	16.4794	14.676	5.93833	156.59	45.8347	123.212	7.31757
NM_025424	78.8041	81.5641	83.1787	92.8508	73.2525	58.1126	53.5635	63.1464	66.5792	54.953	57.2026	80.0149	74.93
NM_144880	9.59835	9.4921	9.97332	9.27325	10.8165	8.86153	11.2136	9.81081	10.5921	10.9203	10.9344	9.76499	12.4683
NM_029766	4.96245	5.03655	4.06713	4.55052	3.9005	3.80364	3.00125	3.60537	3.08206	3.91112	2.12919	3.14713	2.08981
NR_030669	0.0844741	0.0994154	0.0543239	0.0759635	0.0570861	0.134164	0.209215	0.100001	0.151664	0.172949	0.0201482	0.154748	0.058265
NM_011633	10.5964	10.8335	10.564	10.7139	9.40165	16.0219	11.2679	4.91038	8.77852	11.0898	8.1402	5.23257	7.22917
NR_039566	0	0	0	0	0	0	0	0	0	0	0	0	0
NM_144814	9.99848	9.62213	9.49891	10.2352	6.88504	10.2855	8.69047	8.32124	9.31771	9.17149	8.65575	8.16123	6.5841
NM_144881	6.10958	6.02863	6.41132	6.35234	6.92101	3.932	2.7298	5.2752	4.27627	3.92657	2.37561	4.89994	5.31373
NM_001177794,NM_198247	34.2276	34.0748	36.3368	31.793	28.4635	13.2556	9.63115	16.5657	24.6604	12.8066	15.7494	14.4124	11.7487
NM_181546	1.65547	1.36754	1.44665	1.45091	1.61623	1.15012	1.14184	1.08255	1.4087	1.46864	0.925256	1.21257	1.79075
NM_145415	3.6051	3.43279	3.69117	3.41449	5.02526	3.44686	3.45709	2.77723	2.43426	2.59375	3.31205	2.5445	4.15032
NM_153137	0.0189979	0	0.0345047	0.0198216	0.00800619	0	0.0427384	0	0	0	0	0	0
NM_001044751,NM_008288	0.237314	0.125375	0.149094	0.0737393	0.0900531	0	0.0505695	0	0.104148	0.156874	0.130776	0.0657365	0.0550648
NM_008059	3.81897	2.84033	3.4736	2.77533	1.72738	2.78541	3.40251	1.3184	0.775381	3.10369	2.58351	0.455521	0.198496
NM_144817	0.0339798	0.050702	0.0310383	0.0510872	0.0283212	0	0.0364005	0.0354639	0	0.0793991	0.0699201	0	0
NR_029592	0	0	0	0	0	0	0	0	0	0	0	0	0
NR_040477	0	0.0287843	0.0344968	0	0	0	0	0	0	0	0	0	0
NR_033564	0.128205	0.161156	0.154436	0.135794	0.251452	0.0466827	0.101663	0.0799066	0.0886493	0.138228	0.0966007	0.130171	0.128884
NM_010778	0.165305	0.237818	0.167933	0.0627306	0.136788	0.30518	0.522731	0.276662	0.450778	0.825514	0.2967	0.392861	0.312651
NM_013499	18.474	20.1465	18.4862	19.0772	18.4711	15.0349	12.685	16.0009	16.5061	14.5266	15.6912	18.329	15.117
NM_007758	0.00899542	0.00574234	0.00746133	0.00423554	0.00842829	0	0.0231618	0.0164301	0.0160687	0	0	0	0
NM_133485	0.109495	0.111237	0.14671	0.121853	0.242713	0	0.0248125	0.111376	0.118305	0.083501	0.0641477	0.285255	0.0946134
NM_027391	0.0529016	0.0191473	0.0512795	0.0359897	0.038908	0.0766356	0.307341	0.134155	0	0	0.0590357	0.159849	0
NM_001033253,NM_001159942	2.96029	2.85425	2.54491	2.68737	2.44717	1.72645	1.1877	1.90076	2.00489	1.86825	1.65138	1.85559	1.77905
NM_001170785,NM_001170786,NM_172308	20.5372	20.5424	20.1338	20.5573	22.7125	18.1302	13.8433	18.0521	11.4674	16.9172	17.8113	17.2563	14.5449
NM_031185	79.0703	74.3267	73.6826	81.9901	108.063	72.2126	72.8534	86.2428	62.5543	83.5746	75.6113	104.379	166.687
NM_024261	6.2802	6.05656	6.5151	5.51667	6.7844	5.375	6.0078	3.90316	5.36939	4.44198	4.63964	3.8761	4.39178
NM_001195672	0.0209518	0.00770056	0.0110719	0.0248045	0.0199751	0	0.0295912	0	0.0304566	0.0663883	0.0404114	0.0384619	0
NM_007956	0.0122463	0.00618419	0.00864729	0.00868813	0.00602164	0.0373378	0	0	0	0.0156621	0	0.0181476	0.022834
NM_026793	0.224857	0.271669	0.300589	0.351195	0.69415	0.0402864	0.0317737	0.0383902	0.0689972	0.0943732	0.0850233	0.0871326	0.17051
NM_011702	0.0161485	0.0227218	0.0188711	0.0282663	0.0290012	0	0.105734	0	0.0733538	0.172867	0	0	0.071398
NM_001039652	0	0	0	0	0	0	0	0	0	0	0	0	0
NM_172784	5.82957	5.96355	5.63239	5.99716	6.10943	5.515	5.1925	6.79553	7.80286	5.49224	6.13612	6.60686	7.66208
NR_030698	0.990446	0.887315	1.00961	0.824854	0.753781	1.57028	0.960838	1.41522	1.03039	1.22648	0.854882	0.918764	0.366589
NM_145706	8.55443	8.60201	7.98431	8.4884	9.41779	6.73134	6.63034	6.63972	7.98503	5.64593	5.42643	8.08209	7.57366
NM_010690	17.0874	17.0365	15.6012	16.2529	18.1228	21.2887	18.8616	18.3571	21.0335	22.8835	18.0318	17.3517	21.2246
NM_011835	12.4576	12.2737	11.8913	12.3655	13.9035	11.6414	12.6319	12.301	15.2116	12.6707	10.7847	17.1263	15.3829
NM_026141	12.4655	13.5603	12.2202	12.206	13.7389	16.5305	15.8741	16.5423	15.9272	16.2097	14.2386	16.3684	16.3463
NM_172785	0.0299508	0.00924397	0.0360501	0.00965089	0.0164648	0.0395133	0.0295512	0.0507697	0.0496529	0.0750812	0	0.0738412	0
NR_039563	0	0	0	0	0	0	0	0	0	0	0	0	0
NR_038036	0	0.00539242	0.00895712	0.00435718	0	0	0	0	0	0	0	0	0
NR_033630	0	0.006705	0	0	0	0	0	0.0275744	0	0	0	0	0
NR_046010	0	0	0	0	0	0	0	0	0	0	0	0	0
NM_001077707,NM_172937	8.18281	7.59462	7.84463	6.70513	8.34528	7.96485	9.43167	7.68492	9.698	9.58244	8.47374	6.16065	9.03053
NM_001168297,NM_027968	8.05166	8.7835	7.28501	9.75379	9.12982	16.8309	10.5053	10.0859	8.78865	18.2192	14.0497	14.842	9.96511
NM_010146	1.49668	1.35715	1.25125	1.43363	0.661798	0.826418	0.94545	1.78129	3.00252	1.34262	0.966551	1.87806	1.66059
NM_175102	79.6739	76.9415	86.921	88.8148	76.229	59.5383	52.5384	60.0412	48.8006	53.5969	56.8703	58.3922	52.0784
NM_009538	141.441	136.058	125.776	125.366	108.099	141.571	170.628	197.605	181.603	145.955	111.261	183.272	141.478
NM_025799	16.5339	16.2212	14.5701	15.4633	13.3085	19.9592	22.9232	23.368	21.8839	16.3344	19.9405	24.5552	19.6115
NM_025748	4.00156	3.70336	3.93829	4.09143	4.92416	3.49149	4.41202	4.94013	3.55779	3.82877	4.00971	4.49828	5.09959
NM_010437	3.00965	2.88145	2.57422	2.87002	5.50968	4.93916	4.48298	3.73094	3.53251	4.93413	4.62234	3.47069	10.2748
NR_045824	0	0	0	0	0	0.0742535	0	0	0	0	0	0	0
NM_008703	0.0120044	0.0452486	0.0239337	0.0123989	0.0257807	0.0538848	0	0.0828105	0.184573	0.0670545	0	0	0
NM_010828	86.414	116.091	88.09	134.456	81.0055	93.0632	87.5148	88.7275	73.2205	192.378	121.285	116.095	52.0616
NM_138628	0.261718	0.228199	0.212234	0.21738	0.151423	0.230136	0.294437	0.368293	0.362311	0.384189	0.178555	0.25519	0.0882486
NM_001111065,NM_009048	23.1883	23.6989	22.3349	23.8456	26.7487	22.353	19.5314	22.4616	21.5743	23.67	21.0596	23.3124	24.3507
NM_001163592,NM_173390	10.4434	9.67164	9.84288	9.28622	5.78142	10.6586	15.0473	5.4565	5.89643	10.0143	10.3692	4.49235	2.77427
NM_022032	144.515	152.183	155.791	158.022	158.691	117.395	107.455	138.36	129.581	107.136	135.109	151.938	132.706
NR_038021,NR_038022	0.00942999	0.00260236	0.024471	0.0145983	0.0148992	0	0	0.0138543	0	0.0112158	0	0	0
NM_053008	0	0.00565436	0	0	0.00779153	0	0	0	0	0	0	0	0
NM_010511	22.5543	22.9772	22.6837	22.5683	22.6126	20.6445	18.1949	21.4597	24.3688	17.662	19.714	21.142	23.6559
NM_178258	0	0	0	0	0	0	0.0361582	0	0	0	0	0.0330521	0.0692759
NM_172786	0.0277986	0.0343286	0.0587794	0.0341204	0.0461278	0	0.0434911	0	0.0513918	0	0	0	0
NM_008580	1.80489	1.7179	1.55796	1.66126	1.45881	1.12859	1.24052	1.04009	1.13571	1.25391	0.282871	1.36017	1.80261
NM_001198635,NM_008635	0.556261	0.560078	0.536303	0.611182	0.808412	0.755793	0.808571	0.833716	0.875575	0.748856	0.705598	0.741033	1.6219
NM_001101561	210.898	210.398	200.344	211.541	197.011	201.735	182.011	218.448	257.242	185.43	209.774	267.401	245.775
NM_001025392,NM_001025393,NM_153787	31.474	34.07	30.6618	30.9982	35.816	40.5732	38.0831	38.2107	40.4436	50.1309	36.263	40.6237	46.8129
NM_027930	1.14159	1.33584	1.03406	1.2748	1.21494	0.807231	1.21824	0.934855	1.05205	1.55961	0.650599	1.2934	0.730968
NM_001177776,NM_026203	7.52821	7.45236	6.87342	7.30796	7.41	7.89556	7.62788	8.47503	10.291	7.87476	7.73842	8.81494	13.6096
NM_001042593,NM_001145209,NM_019702	30.7725	31.1313	31.4224	30.8975	33.7825	30.3956	31.7012	34.0412	29.1532	29.6773	31.5989	31.3401	28.6495
NM_178713	0.0161223	0	0.0165956	0.00594004	0.0129388	0.05008	0	0	0.0290754	0	0	0.0522292	0
NR_027968	0.0147332	0	0	0	0.0444201	0	0	0	0	0	0	0	0
NR_045843	0	0	0	0	0	0	0	0	0	0	0	0	0
NM_001161845,NM_001161847,NM_001161848,NM_001161849,NM_001161850,NM_011361	14.4199	21.1288	14.7063	35.3105	47.228	24.3697	13.6052	26.5811	17.5474	16.3521	15.8653	145.861	98.6117
NM_009016,NM_009017,NM_009018,NM_020030,NM_198193	4.59612	4.90393	4.9071	4.57413	5.69209	2.32509	2.31952	2.12062	2.97079	2.14243	2.24083	2.76488	3.16202
NM_001177775	0.709933	0.330683	0.472296	0.786077	1.15892	0.768994	0.544517	0.323289	0.400315	0.677564	0	0.101107	0.846999
NR_015465	0.0410919	0.0263932	0.0340128	0.0293195	0.0336607	0.118119	0.121393	0.0686824	0.0447808	0.12048	0.0909922	0.034641	0.145272
NR_028580	0.00819012	0.0134517	0.00536954	0	0.0373335	0	0	0	0	0.0148345	0	0.0171886	0.0143993
NM_178934	0.371131	0.272207	0.386987	0.302625	0.20679	0.417923	0.782482	0.51207	0.540153	0.442413	0.211175	0.221195	0.158444
NM_183116	10.3677	9.9348	9.72024	10.0348	8.78391	9.22829	8.27602	12.4896	9.00909	8.30859	8.11799	10.1712	6.4634
NM_011979	0	0.0131147	0	0.00744481	0	0	0	0	0	0	0	0	0
NM_011704	7.74598	7.68013	8.18047	7.47019	6.46274	10.5165	9.24112	13.1669	13.4149	7.771	7.67132	13.2649	10.2382
NM_053205	0.0158972	0	0	0	0	0	0	0	0	0	0	0	0
NM_001007266	0	0	0	0	0	0	0	0	0	0	0	0	0
NM_001008429	0	0	0	0	0	0	0	0	0	0	0	0	0
NM_001008499	0	0	0.044979	0	0	0	0	0	0	0	0	0	0
NM_001009574	0	0	0	0	0	0	0	0	0	0	0	0	0
NM_001010827	0	0	0	0	0	0	0	0	0	0	0	0	0
NM_001010838	0	0	0	0	0	0	0	0	0	0	0	0	0
NM_001010835	0	0	0	0	0	0	0	0	0	0	0	0	0
NM_001010839	0	0	0	0	0	0	0	0	0	0	0	0	0
NM_001010830	0	0	0	0	0	0	0	0	0	0	0	0	0
NM_016797	33.6212	35.6657	34.2769	35.0973	37.2364	33.5867	33.8245	34.0374	32.1753	33.6342	38.044	37.1058	32.55
NM_021509	3.31613	3.01202	2.83754	3.06592	3.43005	4.53389	2.89901	6.76898	4.65298	4.47058	3.83242	6.3019	5.86729
NM_010217	694.523	1038.26	823.164	1544.29	1486.41	469.012	142.774	652.828	616.282	816.049	914.306	1119.23	1052.61
NM_001166416,NM_027347	8.62283	8.48812	8.34128	7.5488	8.26035	8.49492	9.35213	8.58111	10.2002	8.66672	6.59965	7.5674	9.05398
NM_001199265,NM_013511	46.9012	45.535	47.8689	45.6719	58.5259	50.6519	53.2689	44.8328	50.7988	54.0568	64.3989	43.3733	72.2341
NR_028030	0.0586962	0.0327699	0.128061	0.0213568	0.112187	0	0	0	0	0	0	0.106943	0.215582
NM_001013766,NM_001115154	0	0.00630832	0.0149258	0	0.00712257	0	0	0	0	0	0.0325332	0	0
NM_176837	2.08455	2.3433	2.09133	2.03227	2.59025	2.01072	0.835543	3.09319	1.82028	2.21688	1.22694	2.76088	1.59712
NM_008983	17.2173	17.172	17.8717	17.9032	18.4798	18.4313	15.337	21.68	18.9409	17.1488	18.1393	18.7256	21.9408
NM_178666	0.0158204	0.0253938	0.0287546	0.012667	0.0135308	0.0274307	0.0520643	0	0.0255646	0.0773136	0.115783	0.0958128	0
NM_026138	0.0358361	0.0136201	0.018131	0.0228169	0.0097914	0.013844	0.037195	0.0476603	0	0.0172275	0.039704	0	0.0167221
NM_001162537	0.00620184	0.00385671	0.00197464	0.00878742	0.0191688	0	0.010555	0	0.0108637	0.0118401	0.0417022	0.0195148	0
NM_001110195,NM_025855	7.05698	7.34203	6.60806	7.26152	7.57808	8.47922	6.63531	6.44673	3.6575	6.73736	5.38438	7.01991	2.89791
NM_027168	21.8844	20.1638	20.8947	21.1999	19.2221	18.3262	13.8051	23.5099	20.5336	19.1139	15.9441	23.9441	20.3905
NM_029726	0.00870428	0.0121564	0.00291841	0.00586526	0.0063547	0.0236293	0.132669	0	0.0447912	0.0677298	0.0728107	0.0492867	0.0581101
NM_020565	0	0	0	0	0	0	0	0	0	0	0	0	0
NM_001162957	0.0196024	0.0317443	0.0376719	0.029456	0.0373545	0.0741795	0.0166807	0.0517664	0.0732236	0.084762	0.0227801	0.0525217	0
NM_001162937	0.00998164	0.0123316	0.0387794	0.0534454	0.0121779	0	0	0	0.0607639	0	0	0	0.0642827
NM_009433	40.3657	41.6539	39.7278	40.9497	37.4066	43.1833	37.3028	45.6827	54.1103	41.3523	43.1087	44.8578	45.6541
NM_030203	11.4687	11.6887	10.3669	10.2872	7.33732	9.04308	10.7591	7.48294	5.91659	8.61085	7.22255	6.48629	3.48167
NM_009925	37.8062	37.0389	37.5187	40.174	37.9643	9.01319	6.42685	20.3117	25.0333	8.2402	8.37712	20.6582	23.9006
NM_001159544,NM_010237	7.05741	7.50734	6.80368	6.57992	6.18366	6.23998	5.43836	7.25089	8.11167	6.65892	5.78738	7.81946	4.42677
NM_001081208,NM_001253355,NM_001253356	0.103001	0.183571	0.118928	0.136711	0.119846	0.0754187	0.183259	0.0362367	0.0571462	0.112746	0	0.183418	0.241398
NM_008229	81.3613	81.0248	79.5516	78.8291	85.6638	82.2429	87.7567	84.9077	68.7841	78.4214	83.2094	86.896	73.8476
NM_010681	55.4416	52.6858	48.4475	50.1101	48.5508	73.5532	52.8959	97.4307	89.0221	78.5441	50.9662	88.0781	82.3268
NM_028006	0.926626	1.08982	1.01532	0.81638	0.856752	0.794187	1.28615	1.10086	0.984832	0.695155	0.4912	0.520174	0.724396
NM_001122892,NM_001122893,NM_008054	25.9751	26.9894	26.4594	27.4973	32.1929	26.0735	24.6024	22.8383	25.9883	25.9073	42.2451	23.6116	37.6093
NM_134000	5.07038	5.68393	5.51972	5.82406	6.63331	5.22766	3.68866	4.46816	3.7123	4.44665	5.65288	3.00613	5.02649
NM_011264	6.81684	6.28824	5.46647	5.81077	5.26721	9.5736	8.89044	8.27251	7.31323	11.2118	7.43607	8.00824	6.45352
NM_001168304,NM_198164	4.31594	4.37216	4.41988	4.00319	4.68738	4.94426	6.3847	5.74068	10.0033	5.47095	5.71903	5.72357	10.5563
NM_027572	0	0	0	0	0	0	0	0	0	0	0	0	0
NM_027442	0.00860977	0.00375858	0	0.00865179	0.00462914	0	0	0	0	0	0	0	0
NM_177793	0.72989	0.734419	0.637468	0.716403	0.71014	0.353649	0.727425	0.526607	0.342434	0.526384	0.272188	0.501134	0.403534
NM_031877	3.88283	3.51279	4.15925	3.39338	3.49126	3.49684	3.92932	3.54203	3.66269	3.21557	3.00899	3.15182	4.63831
NM_001277229,NM_001277230,NM_153398,NR_102360	7.13313	6.38434	6.74203	5.57614	6.50485	7.20276	8.52448	7.40612	10.0567	7.54895	6.25196	7.01562	8.46344
NM_001164433,NM_138315	13.8343	14.1555	14.2648	14.7555	13.9042	12.0689	12.8825	10.8269	13.108	13.6801	14.8843	11.8864	15.4737
NM_028430	0.0247723	0.0993752	0.0854687	0.0730223	0.10423	0	0.162199	0	0	0.132592	0	0	0
NM_016898	154.574	161.564	155.336	157.54	161.754	147.835	142.075	166.673	165.759	132.935	154.047	166.597	153.329
NR_045341	0	0.0557196	0.026621	0	0.0358231	0	0	0	0	0	0	0	0
NM_001013370,NM_001162908	7.51229	7.20286	7.40324	6.77433	4.72934	8.678	9.27001	12.257	13.6932	7.87146	5.42255	8.50814	6.64168
NM_017472	100.894	100.182	106.362	114.516	110.493	97.738	80.9242	96.8783	78.3343	88.5669	109.492	98.1629	95.6471
NM_172416	18.399	19.3712	19.2807	19.5952	18.2514	16.4013	18.422	18.7723	20.4557	16.5569	19.4595	17.8577	17.8305
NM_153055	29.6399	30.0224	29.6513	29.0885	36.879	33.0599	29.5392	35.9621	36.3313	36.1536	34.6685	38.4505	41.7415
NM_172938	0.108356	0.0712434	0.083407	0.11059	0.273809	0.0790569	0.0126493	0.13529	0.0603115	0.039233	0.0327022	0.0233869	0.0689206
NR_102361	0.26121	0.224204	0.203411	0.244558	0.0956668	0.340711	0.237317	0.15565	0.308094	0.116694	0.0896475	0.391658	0.0944671
NM_001168289,NM_027772	5.01018	4.71961	4.45165	4.33785	4.72717	3.79049	4.62642	5.18552	4.19454	4.05421	3.52425	4.01886	3.1649
NM_199028	2.62059	2.70286	2.34615	2.82126	3.5262	3.14293	1.98062	1.55187	1.86337	3.13459	2.33478	1.23961	3.01795
NM_009846	19.9557	21.458	22.1859	20.2454	23.1424	19.8294	30.746	10.0011	8.18493	18.4185	38.5702	9.35541	12.0467
NR_033558	0	0.00647223	0	0	0	0	0	0	0	0	0	0	0
NR_040581	0	0	0	0	0	0	0	0	0	0	0	0	0
NM_130892	2.89562	2.63825	2.67206	2.75767	2.34733	2.12553	3.76068	3.0638	1.91825	2.89111	2.0501	2.43594	1.50082
NR_001582,NR_027506	0	0	0	0	0	0	0	0	0	0	0	0	0
NM_053069	15.6272	15.3458	15.6132	15.0202	16.8108	14.027	13.1584	14.2029	14.5149	11.209	13.0331	15.5299	13.6705
NR_035450	0	0	0	0	0	0	0	0	0	0	0	0	0
NM_011156	63.9587	66.0528	65.5844	69.6239	68.6565	56.7565	49.9117	54.7464	42.7297	55.8931	62.037	51.2716	60.0582
NM_024286	0.889929	1.16633	0.741504	1.1018	0.907596	1.09947	0.60456	0.277485	0.415528	1.21997	1.20929	0.285237	0.20992
NM_024285	7.64132	8.62952	7.72865	8.22534	7.49205	5.75936	4.68719	2.78879	4.24976	4.89033	5.38169	2.79322	3.02551
NM_172473	5.34134	5.63635	5.16456	5.79727	5.70312	5.36474	6.00635	6.44404	9.16579	5.49906	5.90623	6.39844	8.27202
NR_040624	0.0332823	0.0418818	0.0275468	0.036385	0.0226919	0	0.0971438	0.164695	0.0351582	0.182585	0	0.0443994	0.0558652
NR_028274	0	0	0	0	0	0	0	0	0	0	0	0	0
NM_198007	11.8832	11.9488	11.5557	11.4984	13.9827	14.3868	13.9918	12.2767	12.4077	14.1011	18.1315	11.3675	15.4605
NM_011376	0.00296874	0.00564348	0.0015015	0.00186698	0.00361184	0	0.0160518	0	0	0.01589	0	0.0148388	0
NM_008147	0.0105517	0.0136732	0	0	0.0132275	0	0	0	0	0	0	0	0
NM_013532	0.0287771	0.0384842	0.0208488	0.0197507	0.0226987	0	0	0	0	0.0534069	0	0	0
NM_001159389,NM_177306	0	0	0	0.00366588	0	0	0	0	0	0	0	0	0
NM_153786	0.0338708	0.0321937	0.0466876	0.0106504	0.0209703	0	0	0	0	0	0	0.119019	0
NM_025705	4.83482	4.9616	5.26359	4.96193	4.85657	4.27705	3.71739	3.74459	4.94522	3.44181	3.34093	3.5109	4.22101
NM_025684	0	0.00650844	0	0.00828693	0.0474279	0	0	0.0987037	0.0598572	0	0	0	0
NM_030250	40.0424	44.7465	41.4726	43.6962	49.5903	41.3344	36.2796	40.0875	33.6988	40.5087	49.308	39.6772	38.9391
NM_178675	4.42965	4.5755	4.15132	4.702	3.75882	3.61402	3.32398	3.32162	2.94674	3.39108	2.49093	3.76161	2.34816
NR_038015	0.0281132	0.0336087	0	0	0	0	0.31279	0	0	0	0	0	0.211215
NM_001141927,NM_023129	0	0	0.00571489	0	0	0	0	0	0	0	0	0	0
NM_025541	7.88041	8.27429	7.88695	7.77474	8.68631	7.34329	8.47779	6.44962	7.46142	8.01447	7.06387	7.63919	7.82228
NR_038016	0.536279	0.641435	0.598373	0.665532	0.53001	0.303468	0.466371	1.34139	0.654179	0.573408	0.729335	1.34788	0.645432
NM_001163833	3.50732	3.56213	4.03592	3.11345	4.13685	2.44839	3.07232	1.99062	2.18027	1.70856	3.2823	0.88802	2.80536
NM_010288	83.2815	81.6042	85.0404	83.9694	113.986	97.8767	124.108	71.1059	63.6226	89.7361	156.498	82.5216	99.0846
NM_008297	10.5293	10.9634	10.7161	10.1547	9.3549	15.8911	19.1859	11.1679	15.8726	15.2614	15.378	11.6867	10.1099
NM_001039050,NM_001039051,NM_001039052,NM_001039053,NM_001190402,NM_008863	0.0107264	0.0192273	0.0155052	0.012119	0.0155452	0	0	0	0	0	0	0	0
NM_021272	0.637545	0.414557	0.344759	0.432885	0.327063	0.2798	0	0.504454	0.107688	0.117368	0.142886	0.271987	0
NM_020561	22.3248	21.9146	20.4277	22.6041	20.3396	30.0362	29.2881	39.1692	41.1384	27.0321	29.764	38.2739	35.9417
NM_027375	6.24381	5.98089	5.86376	5.42289	6.75811	8.19983	9.52438	8.38999	7.32352	11.1628	7.459	7.54354	8.45996
NM_001193303,NM_026148,NM_201242	60.8361	68.9748	60.9165	69.8232	67.5935	92.3683	77.3212	71.5376	64.4868	90.0291	92.8531	79.679	63.7302
NM_011240	21.6226	20.7199	19.1053	20.774	25.171	30.3762	25.8589	22.8037	23.4014	36.5248	29.9831	23.7688	30.0627
NM_001162956	0.226629	0.3543	0.305924	0.243636	0.225927	0.204957	0.478423	0.561368	0.568254	0.272084	0.1974	0.334528	0.332886
NR_033565	0.008763	0	0	0	0	0	0	0	0	0	0	0	0
NM_172788	9.44108	9.49889	9.35445	9.41427	6.95786	10.5614	4.45533	11.6736	11.5793	10.8859	5.78534	11.18	6.85358
NM_172939	3.4155	3.69749	3.18295	4.48402	5.45989	2.33681	3.24299	4.06374	4.52624	3.47239	3.93417	7.11247	7.78796
NM_011030	74.2086	75.7382	80.9404	77.7616	73.598	73.2174	68.764	91.2335	96.3474	68.1747	74.6226	89.5164	85.1401
NM_023530	0	0	0	0	0	0	0	0	0	0	0	0	0
NM_144822	35.7558	35.0645	35.8313	36.5612	34.5771	36.4559	34.1777	44.6899	43.8944	33.0498	40.4608	42.6863	43.6112
NM_019965	24.0896	25.2158	25.0582	28.8325	23.6028	27.7184	22.0333	27.9083	30.6573	23.4348	26.4383	27.3762	32.9116
NM_001199187,NM_026937	19.8247	20.4165	20.1814	21.5716	16.8516	19.928	18.7596	22.6757	21.8821	17.1362	16.3947	24.0915	19.926
NM_052994	0.959145	0.828661	0.851552	0.836327	0.753466	0.751508	0.907413	0.764646	0.443028	0.551816	0.679157	0.720648	0.54839
NM_001146120,NM_001146121,NM_001146122,NM_001146123,NM_001146124,NM_011179	430.52	424.321	431.949	455.241	398.059	403.591	359.123	546.249	536.421	346.896	419.367	509.972	553.945
NM_001159572,NM_028732	2.06986	1.94754	1.92134	1.76217	0.912025	1.84777	2.57551	1.95868	1.72785	2.10092	1.63283	1.3011	0.856611
NM_001164374	0.221061	0.269763	0.205224	0.0762252	0.040126	0.396515	0	0	0	0.276558	0	0	0.145822
NR_040638	0	0	0	0	0	0	0	0	0	0	0	0	0
NM_025273	3.8073	3.52923	3.7657	3.00128	3.19909	4.04966	7.23757	4.81913	5.02508	4.85	4.66913	6.52461	3.14361
NM_001017407,NM_001017409,NM_001017419,NM_001017433,NM_001017441,NM_023064	0.0120704	0.0212811	0.0174433	0.0171953	0.0195145	0.0643553	0	0	0	0	0	0	0
NM_011073	0	0	0	0	0	0	0	0	0	0	0	0	0
NM_013611	0.0164323	0.00557013	0.0114077	0.00632398	0.0125779	0	0	0	0	0	0.0743697	0	0
NM_153542	6.80083	6.29855	7.29785	6.40651	6.10126	6.34658	7.49398	5.67697	6.49006	5.371	6.35605	4.22057	6.62934
NM_001177511	0.00886725	0.0205366	0.0643717	0.035428	0.0240216	0.092976	0	0	0	0	0	0	0
NM_026438	50.5838	50.3541	54.2287	53.6031	63.6784	48.9269	45.0871	32.5038	20.1893	48.3544	63.9828	38.1739	32.8527
NM_009120	127.632	131.166	129.306	130.913	138.294	139.882	125.388	143.163	121.019	130.37	157.746	145.217	129.741
NM_001272090,NM_001272091,NM_001272092,NM_027912,NR_073587	21.8398	22.8584	25.4946	22.7005	20.2136	16.1229	20.904	18.5635	20.8321	18.0244	15.6488	17.8475	17.7591
NM_001039194,NM_153779,NM_178058	6.71279	6.40788	7.24094	7.70855	6.32071	7.78228	9.14423	7.93283	7.40389	7.91015	7.74107	8.47468	7.23184
NR_039568	0	0	0	0	0	0	0	0	0	0	0	0	0
NM_009719	0	0	0	0	0	0	0	0	0	0	0	0	0
NM_009314	0	0	0	0	0.0254634	0	0.028042	0.0481768	0	0.0314563	0.110792	0	0
NR_038038	0.984948	0.666878	0.762456	0.789792	0.489524	0	0.80992	0.92722	0.516841	0.188012	0.204482	0.435114	0.182631
NR_027926	0.387744	0.36771	0.329402	0.400371	0.361961	0.26919	0.158738	0.437389	0.156424	0.284353	0.0738901	0.847869	0.280191
NM_175194	9.48173	10.0902	9.82942	10.4602	9.55827	11.69	12.0167	13.762	13.7672	12.0744	11.74	12.3202	10.9775
NM_177372	1.02649	1.1001	0.897323	0.95898	0.973223	0.565391	0.871039	0.667268	0.548319	0.706503	0.578057	0.676562	0.407368
NM_027425	4.15815	4.11027	4.23459	3.7596	4.04191	5.58366	8.24848	6.22662	5.95239	7.35088	5.10238	5.83476	4.78025
NM_026085	0.78929	0.860922	0.865992	0.945026	0.5118	0.870186	1.19833	0.67282	1.25514	0.979242	0.571192	1.50481	0.907056
NM_026701	0	0.0207404	0.0134607	0.0284353	0.00834589	0	0.047139	0	0.0557023	0	0.0857064	0.0612928	0
NM_016864	0	0	0	0	0	0	0	0	0	0	0	0	0
NM_026101,NM_030114	12.6079	13.0088	12.5536	12.0379	16.3751	13.0496	15.1489	11.4785	14.4918	13.4359	20.5911	13.9389	15.8965
NM_001253685,NM_013888	2.53445	2.40417	2.45087	2.43781	1.92898	2.12874	3.34621	1.95295	2.80656	1.94988	2.12019	2.48899	1.49987
NM_001164376,NM_001164519,NM_177612	0.0480187	0.0227724	0.017724	0.0429449	0.025139	0	0.052859	0.0302357	0	0.0432113	0.0298061	0.0687207	0
NM_001242396,NM_207221	8.99424	8.9553	8.45717	9.65968	9.61545	14.528	13.4191	12.2776	11.0499	16.3987	12.2171	13.2703	12.915
NM_010118	0.534903	2.46681	0.506168	12.2864	3.80594	0.166523	0	2.55164	0.442441	0.152612	0.0823164	28.0977	4.82301
NM_001081346	0.64845	0.569899	0.500013	0.450332	0.393916	0.359908	0.565558	0.181102	0.188769	0.393661	0.410583	0.288977	0.0671404
NM_177794	0.633767	0.398877	0.379986	0.417411	0.299604	0.62507	0.847601	1.11016	0.336405	0.693411	0.484841	0.640617	0.264663
NM_001081347,NM_001252636,NM_001252637,NM_001252638	2.70713	2.45872	2.6483	2.47996	2.18232	2.98738	2.28656	1.91549	2.14012	3.44622	4.29025	1.48003	1.7757
NM_009670,NM_146005,NM_170687,NM_170688,NM_170689,NM_170690,NM_170728,NM_170729,NM_170730	3.80741	3.6997	3.35067	3.61737	4.34655	3.66341	2.78613	4.28649	2.6965	4.05828	2.27485	4.34862	4.58213
NM_001111121	17.9842	17.9496	19.1163	16.3243	19.5536	19.8035	20.1307	18.3332	23.2838	18.4357	26.8442	17.2704	25.2352
NR_038041	0.109071	0.235415	0.164565	0.221203	0	0.22584	0.356237	0.43042	0.257858	0	0	0.4632	0
NM_025807	0.664538	0.582846	0.647577	0.571826	0.487393	0.626856	0.561296	0.790975	0.638042	0.601941	0.35146	0.776651	0.260959
NM_001143776,NM_001143777,NM_024244	7.38994	7.21221	7.32971	6.50132	5.79335	5.01459	6.93553	4.27853	4.95536	4.96001	5.53683	4.14614	3.67553
NM_027184	4.98901	4.98065	5.24544	5.04941	6.49457	6.46787	6.04743	5.67653	6.00887	5.98607	6.73279	7.72723	8.30513
NM_025635	27.1531	29.6071	28.0756	30.9462	38.6567	36.8447	32.6558	34.4286	29.9942	39.0922	45.8448	43.9233	52.4958
NM_001142735,NM_001142736,NM_001142737,NM_001142738,NM_001142739,NM_001142740,NM_001142741,NM_001142742,NM_001142743,NM_001142746,NM_001142747,NM_001142748,NM_001142760,NM_023115	0.0444955	0.0248129	0.0340526	0.0502279	0.0296718	0.0581086	0.0784806	0.0692324	0.0948561	0.0476935	0.053304	0.0650831	0.0726866
NM_010311	1.33336	1.26318	1.15446	1.31641	0.61597	1.75792	1.23633	0.543447	0.61251	1.47479	1.27275	0.764855	0.576437
NM_029781	1.86118	1.98135	1.56943	1.5976	1.18018	1.84749	3.3933	2.59156	2.59987	2.79676	0.927297	3.12899	1.20683
NM_001081412	12.6127	11.9494	12.1961	12.3987	12.9371	10.4349	10.2656	11.074	12.7147	10.7666	11.0557	9.66519	16.4437
NM_001145826,NM_153406	19.9979	18.5756	18.5082	18.4027	16.739	21.8243	21.3436	21.4037	27.7993	23.614	19.2819	21.4677	25.2181
NM_009630	0.0381712	0.0328533	0.0197836	0.0588002	0.0321631	0.0437978	0.059835	0.0342256	0.10845	0.110855	0.0337393	0.0456774	0.148114
NR_033602	0	0	0.015477	0	0	0	0	0	0	0	0	0	0
NM_133995	0.125331	0.0538054	0.056391	0.0414511	0.064133	0.08464	0.046947	0.0806562	0.04832	0.105326	0	0	0
NR_045841	0	0	0	0	0	0	0	0	0	0	0	0	0
NM_026095	156.645	154.505	164.478	161.735	177.114	118.061	103.866	101.922	92.6235	117.758	133.81	118.415	105.098
NM_008116	0.130332	0.0818262	0.0793708	0.0478094	0.07269	0.0847805	0.275424	0.0544662	0.139166	0.232221	0.0432951	0.0998208	0.103559
NM_011820	0.412045	0.355997	0.33267	0.335986	0.193756	0.364361	0.650842	0.585354	0.33326	0.255495	0.268662	0.484893	0.517228
NM_024440	0.306776	0.29993	0.404287	0.403294	0.383453	0.681599	1.21344	1.09008	0.448543	0.259612	0.480942	0.388137	0.473183
NM_175329	4.00078	4.24391	4.71255	4.38192	4.48387	3.21997	2.62758	2.09931	2.2475	2.70598	3.42538	2.68947	2.89392
NM_009514	0.0868442	0.142753	0.178368	0.130077	0.0304875	0.133234	0.295602	0	0	0	0	0	0
NM_198635	0.00808581	0	0.00478628	0.00508501	0.00550319	0	0.0310829	0	0	0	0.0266609	0	0
NM_177475	8.5585	8.03828	8.02604	8.04585	8.44573	8.67914	8.21344	4.39349	5.53008	9.17691	7.65363	3.45427	5.81564
NM_133184	0.0563335	0.0292109	0.0269163	0.0397098	0.00642222	0	0.0754053	0.0431318	0	0.0349253	0	0	0.0339007
NM_009115	0.284496	0.360503	0.172187	0.204319	0.19642	0.0357091	0.264922	0.259048	0.148103	0.300611	0.102412	0.14648	0.215836
NR_040580	0	0	0	0	0	0	0	0.163347	0	0	0	0	0
NM_029816	0	0.00994723	0.0109358	0.00829767	0.021498	0	0	0	0	0	0	0	0
NM_019434	12.7052	11.851	11.8844	11.8816	12.2397	11.9134	14.1611	10.2354	10.9296	12.7272	10.2109	9.7622	9.56578
NM_146006	70.4533	76.0577	78.8593	86.7419	81.2593	69.5344	65.2815	26.6607	11.8523	91.6482	71.9515	28.3225	13.3939
NM_029661	0.0189827	0.0374291	0.0480042	0.0430176	0.0317573	0.0909779	0.0513191	0	0	0	0	0	0
NM_080845	0.0096102	0.0233814	0.00979642	0.0202097	0.0303253	0.0407092	0.0229633	0.031812	0	0.0969823	0.0280069	0.0424562	0.0250036
NR_045882	0	0	0	0	0	0	0	0	0	0	0	0	0
NM_001199271,NM_031196	9.85039	10.2502	9.29633	10.2693	11.2962	7.8223	6.19615	7.16679	4.44179	6.8189	5.34706	5.88263	6.29394
NM_030262	86.4292	87.9832	86.1219	90.9607	85.4449	89.0363	74.6459	92.5081	87.6962	83.851	93.1179	94.6519	102.437
NR_027377	0.117223	0.127806	0.157176	0.0954456	0.0887848	0.131184	0.232476	0.2014	0.107066	0.157728	0.0630557	0.0901884	0.0265572
NM_008404	0.0799257	0.0841273	0.0944075	0.0794216	0.0898637	0.0390235	0.0432902	0	0.0363688	0.0914148	0	0.0400189	0
NM_145925	95.287	95.1786	95.7464	102.497	106.753	96.2791	86.3123	117.543	132.242	84.1159	119.85	123.378	190.976
NM_019929	50.6515	50.1161	49.8961	53.0794	45.2553	42.7146	38.7733	44.7878	41.6543	39.7533	43.1901	43.176	41.7069
NM_019803	70.4518	74.4455	75.9428	77.6545	78.944	71.8932	63.4192	64.8799	70.6055	67.1832	113.27	73.4013	86.159
NR_035451	0	0	0	0	0	0	0	0	0	0	0	0	0
NR_026831	0	0	0	0	0	0	0	0	0	0	0	0	0
NM_001081452	0	0	0	0	0	0	0	0	0	0	0	0	0
NM_001205035	0	0	0	0	0	0	0	0	0	0	0	0	0
NM_010670	0	0	0	0	0	0	0	0	0	0	0	0	0
NM_001205033	0	0	0	0	0	0	0	0	0	0	0	0	0
NM_001205009	0	0	0	0	0	0	0	0	0	0	0	0	0
NM_001024709	0	0	0	0	0	0	0	0	0	0	0	0	0
NM_001162944	0	0	0	0	0	0	0	0	0	0	0	0	0
NM_001101631	0	0	0	0	0	0	0	0	0	0	0	0	0
NR_015547	0	0	0	0	0	0	0	0	0	0	0	0	0
NM_026431	7.85589	8.05869	8.28456	8.2864	6.66219	7.41464	11.3938	11.3365	11.1434	7.64441	6.74671	10.3281	7.73354
NM_001081695,NM_019448	0.0316451	0.041007	0.0502742	0.0940794	0.0538146	0.0355085	0.118182	0	0	0.0779928	0.101841	0	0
NM_015790	0.182574	0.270046	0.29773	0.230981	0.18388	0.0407793	0.141725	0.0777199	0.183857	0.0955278	0.0893663	0.0712191	0.0492572
NM_007793	167.766	170.089	174.747	188.312	193.074	127.286	118.085	104.963	110.241	124.997	170.527	121.571	119.484
NM_173751	20.0012	20.7893	21.004	22.2665	19.9585	18.8544	15.498	19.821	20.1412	18.0857	17.2012	19.4072	18.647
NM_009200	25.3722	25.7144	26.813	28.0391	19.351	21.0201	18.3255	21.2759	17.1309	20.7399	19.5177	20.6756	14.8213
NM_207571	0	0	0	0	0	0	0	0	0	0	0	0	0
NM_001199840	0	0	0	0	0	0.115355	0	0	0	0	0	0	0
NM_207201	0	0	0	0	0	0	0	0	0	0	0	0	0
NM_147042	0	0	0	0	0	0	0	0	0.0560842	0	0	0	0
NM_147071	0	0	0	0	0	0	0	0	0	0	0	0	0
NM_147040	0	0	0	0	0	0	0	0	0	0	0	0	0
NM_147041	0	0	0	0	0	0	0	0	0	0	0	0	0
NM_001103368	0	0	0	0	0	0	0.0342726	0	0	0	0	0	0
NM_175936	0	0	0	0	0	0	0	0	0	0	0	0	0
NM_001101572	0	0	0	0	0	0	0	0	0	0	0	0	0
NM_001104537	0	0	0	0	0	0	0	0	0	0	0	0	0
NM_013591	0.0486212	0.0371073	0.0586074	0.0820801	0.0734644	0	0.115117	0.0658467	0.208648	0.0533183	0	0	0.0777339
NM_148934	23.5534	21.7142	24.4441	23.6116	19.256	18.3652	14.8964	17.9438	19.234	15.5624	18.2125	18.3443	15.4925
NM_177613	82.6468	88.2923	95.9204	100.599	91.0432	71.5491	60.6797	57.4617	58.1107	73.0708	77.8328	66.0275	55.1572
NM_008504	0.660403	0.526987	0.571811	0.750673	0.810708	0.384019	0.754495	0.423767	0.675036	1.30915	0.633817	2.06838	0.902832
NM_001077184,NM_009768	356.756	355.946	368.216	400.508	336.967	309.555	278.202	370.766	395.964	270.487	337.218	389.152	402.575
NM_008226	0.815311	0.896021	1.06012	0.923188	0.66663	0.857451	0.560961	1.2456	1.83468	0.699127	0.613361	1.03978	1.14176
NM_023304	0.328997	0.30542	0.137013	0.310495	0.235227	0	0	0.577944	0.214878	0.647101	0.539557	0	0
NM_031380	24.2641	25.9864	27.3195	26.561	25.1156	31.0439	36.0452	23.7512	24.1051	25.7785	46.5464	22.6695	23.7237
NM_001161747,NM_023128	39.9727	39.4069	42.217	40.4857	28.3583	31.6407	34.4492	32.6768	32.9878	27.5637	33.1052	31.0242	20.0657
NM_030218	0.175133	0.193237	0.169167	0.146082	0.18517	0.0935138	0.0628065	0.188038	0.370512	0.174323	0.224941	0.249962	0.112837
NM_001077363,NM_008956	110.438	118.708	121.002	128.963	123.877	102.822	93.7114	110.01	97.9288	102.292	99.2581	131.997	125.856
NM_011178	0.0574139	0.0158397	0	0.0971519	0.0170632	0	0	0	0	0.150189	0	0.140465	0
NM_015779	0	0.0211321	0	0	0	0	0	0	0	0	0	0	0
NM_013459	0	0	0	0	0.0181947	0	0	0	0	0	0	0	0
NM_053244	0.397152	0.342801	0.348828	0.348473	0.259928	0.381003	0.526225	0.522574	1.16425	0.465746	0.277898	0.810478	0.476781
NM_007880	2.00475	1.79419	2.21667	2.09102	2.25379	2.64693	2.45403	1.25943	2.18227	1.89037	2.32153	1.20254	2.17458
NM_175450	19.1672	19.5441	20.6948	20.9783	21.201	17.5246	14.8447	16.658	12.9943	16.1009	17.2314	16.0055	17.06
NM_130455	0.416097	0.473454	0.512768	0.598267	0.564196	0.434031	0.704225	0.581291	0.892272	0.613104	0.487001	0.412895	0.520675
NM_007725	612.408	630.776	641.093	667.817	599.674	627.899	536.729	537.222	486.788	593.97	622.07	553.799	491.063
NM_013850	1.69285	1.59759	1.64241	1.95203	1.30788	2.04771	2.75654	2.00078	1.8308	1.68062	1.66298	1.9517	1.64919
NM_001142701,NM_027521	0.649457	0.622472	0.633886	0.696975	0.360108	0.505266	0.777982	0.418186	0.264321	0.567449	0.205469	0.527247	0.133912
NM_001037741,NM_008162	21.0777	21.4357	23.6375	26.0536	18.0023	14.7426	15.7345	14.5621	17.2425	15.2224	18.3674	19.7308	17.3235
NM_011492	50.3342	48.2606	56.4325	57.0876	49.6669	49.9951	50.053	48.7503	50.6133	51.4218	54.1626	43.5556	55.4003
NM_025313	176.425	179.215	196.984	207.385	166.39	143.758	123.334	133.946	143.072	127.904	151.035	147.266	157.511
NM_021565	45.1184	48.9251	48.9402	68.0987	53.3065	44.336	39.0324	46.2853	47.568	62.6958	48.7973	77.2581	62.6696
NM_007705	19.4865	20.5629	19.1539	20.5802	15.3265	21.4997	33.5963	52.3585	57.0076	31.7737	17.1046	61.1211	40.397
NM_027207	11.1509	12.0808	12.4667	12.6171	11.8634	11.0367	13.6659	13.6782	13.4032	10.4516	12.392	17.3195	9.151
NM_007909	3.24041	3.04067	3.36832	2.81774	2.77431	2.81044	3.39239	2.8881	2.56485	2.04613	2.29285	2.42541	1.92213
NM_023431	9.78574	9.83124	10.4984	9.62648	9.57851	8.21524	10.2913	9.46705	9.57606	10.2293	6.13348	8.51595	8.22713
NM_029272	57.859	58.3286	70.3194	74.2727	52.9497	54.2413	46.7039	54.6934	47.5212	51.7881	62.4408	61.717	52.5972
NM_001122604,NM_001122605,NM_133188	39.2123	42.48	41.3335	44.3697	40.0446	41.9174	49.7152	43.9074	41.4956	48.9098	43.1727	46.1607	35.5875
NM_009091	542.636	555.927	561.411	581.371	517.699	461.845	438.173	531.279	648.618	415.538	494.33	667.768	606.309
NM_011789	2.26176	1.62271	2.02833	1.79009	1.18467	1.17033	1.81462	1.75688	1.93586	1.47827	1.58968	1.44626	1.18761
NM_001204931,NM_139292	1.45014	1.56065	1.52087	1.36308	1.38387	1.04298	0.750528	0.620181	1.05217	1.25273	0.674294	0.975639	1.34267
NM_183152	0.113054	0.105687	0.124016	0.115479	0.0400438	0.108155	0.146372	0.18746	0.0818678	0.0936872	0.0737051	0.117757	0.0988765
NM_139226	0.00216542	0	0	0	0	0	0	0	0	0	0.0156206	0	0.0348915
NM_001100606,NM_019575	48.2701	49.786	50.6843	52.2381	51.0405	46.8591	39.8658	38.6043	34.5709	44.4435	54.4379	37.5001	44.4403
NM_001159591,NM_134002	81.0635	81.8021	84.8376	93.0563	90.1863	87.9993	74.7361	85.5878	73.5039	88.5562	84.8253	94.2918	97.917
NM_027829	13.8113	14.0929	14.362	13.8293	8.76764	20.7477	39.7931	23.7803	20.9946	29.2063	14.3914	30.4277	10.612
NM_199322	10.5095	11.7912	11.3231	13.4765	11.9474	17.8143	14.1791	8.25339	9.52747	23.011	27.0717	15.3088	11.7081
NM_013651	30.5466	32.1222	32.7814	31.419	32.596	24.5069	20.5465	18.5739	18.4973	24.4725	24.3051	17.8097	20.0602
NM_007445	0.234547	0.292485	0.318655	0.247392	0.30179	0.315741	0.376536	0.407215	0.428142	0.670009	0.371875	0.300116	0.279677
NM_008753	14.2564	16.0275	15.2655	15.8009	14.4326	15.735	12.9899	13.0543	14.2032	13.0271	16.9086	18.4791	13.1665
NR_035503	0	0	0	0	0	0	0	0	0	0	0	0	0
NM_175195	13.4723	13.0916	13.6215	13.7715	11.3453	13.286	13.8999	16.0382	15.5069	12.2458	11.0696	14.1725	12.3133
NM_001081688	0.024306	0.0364514	0.0184029	0.0226631	0	0.0786672	0.0754611	0.0303917	0	0	0.0215752	0.0556992	0
NM_008655	72.0347	84.4715	83.8266	83.9997	55.3051	166.765	119.832	71.4462	90.4512	145.792	180.083	88.5564	40.3994
NM_022653	17.6009	17.6225	18.5329	19.4638	19.9748	15.052	15.0256	16.5861	14.8572	15.4818	15.4879	16.4721	15.3032
NM_023138	47.106	49.1901	51.6683	53.2797	46.5732	50.9122	47.9032	51.1925	49.4711	48.7502	56.1919	54.4623	55.8993
NM_010731	8.65461	9.1236	9.00932	10.89	11.0223	13.9326	10.2459	8.21466	10.5487	14.5482	13.0619	9.47664	14.0715
NM_007907	1157.78	1119.75	1231.69	1260.12	1011.75	1139.52	1003.95	1596.15	1609.56	982.684	1117.25	1522.38	1759.06
NR_028549	0	0	0	0	0	0	0	0	0	0	0	0	0
NM_001190473,NM_001190474,NM_007828	28.7005	28.8515	32.8677	34.9429	25.7248	26.9897	27.4879	31.7714	23.6549	28.2616	30.7693	27.8107	26.6995
NR_015477	0	0	0	0.113442	0	0	0	0	0	0	0	0	0
NM_001034895	1.61632	1.44288	1.41513	1.3999	0.689116	1.68143	3.2836	3.31746	4.53509	2.06478	1.40632	3.94251	2.08705
NM_010768	0.2089	0.328513	0.22284	0.225685	0.253544	0.269681	0.252197	0.856845	0.602771	0.308587	0.332965	0.376918	0.390325
NM_018758,NR_037218	23.6339	23.8039	26.3332	25.3721	22.7072	26.0071	28.7377	20.9664	21.2767	27.8479	32.0803	21.6817	22.6496
NM_001146687,NM_008844	26.2391	25.8147	28.3272	27.4425	24.6635	25.8024	26.775	30.5484	33.7351	27.3239	25.3227	29.8121	35.6573
NM_027381	22.4352	22.2818	23.2784	22.7286	22.3322	24.0741	22.78	15.9487	18.7895	23.5139	24.9767	15.7282	20.5523
NM_001277265,NM_009325	5.25347	4.58266	4.87665	4.53395	2.10364	2.32231	3.29585	1.94664	0.972442	2.6333	1.8091	1.45882	0.552821
NM_028657	4.70231	4.41667	4.99103	4.97092	3.54884	3.7873	6.12687	5.38592	5.68396	4.12064	3.91775	5.70283	4.84798
NM_133964	33.9654	34.8541	47.2562	43.6185	37.3608	41.3545	35.6639	42.3957	37.5283	39.0228	51.5429	49.1815	37.5243
NM_001099917	0.707829	0.808066	0.653949	0.820744	0.446779	0.286411	0.543617	0.493009	0.490526	0.670934	0.193755	0.619458	0.605765
NM_001276288,NM_010347,NR_074087	185.569	184.854	192.185	199.781	172.171	160.355	158.549	177.341	171.97	148.668	179.512	173.926	166.794
NM_001252401,NM_019725	3.29751	3.55424	3.78329	2.96086	2.11006	7.58948	16.5944	10.5294	8.09805	11.3643	3.98124	11.0895	4.36213
NR_030677	0.357524	0.245209	0.34843	0.239847	0.213909	0.365835	0.37086	0.435918	0.265056	0.106075	0.135123	0.0889047	0.242273
NM_027480	1.85	2.04285	1.88018	1.81132	1.12381	2.43074	4.49631	3.73422	3.40423	3.49573	1.44897	3.80505	1.76766
NM_001142963	0.0288405	0.0347817	0.0149998	0.0168451	0.0413482	0.022524	0.0127054	0.0394295	0.0475019	0.0142524	0.015496	0.0165142	0
NM_001243067	0.194894	0.286525	0.192791	0.21463	0.255625	0.304764	0.2823	0.282504	0.446596	0.432285	0.441935	0.56234	0.402759
NM_001142963	0	0	0	0	0	0	0	0	0	0	0	0	0
NM_001243067	0.343167	0.321022	0.287591	0.280447	0.321353	0.166672	0.132068	0.256142	0.27186	0.148148	0.0644298	0.137327	0.201322
NM_001024626	1.84027	1.5735	1.62842	1.14441	1.5868	1.64134	2.80104	2.31149	2.488	1.43971	1.30816	1.62471	1.64647
NM_001163064	1.54677	1.39685	1.44201	1.25036	1.58862	1.6902	2.79596	2.2628	1.8058	1.60829	1.37822	1.53659	2.58094
NM_011561,NM_172552	3.67538	3.85461	3.50508	4.08343	4.21661	2.26459	2.74363	2.16687	1.76658	3.21556	3.16182	1.78836	2.09862
NM_001081218	15.167	14.2516	14.5357	15.9301	13.7864	18.0757	19.2785	13.248	16.4603	19.201	22.0463	15.6369	14.6209
NR_038042	0.163329	0.177512	0.183194	0.251731	0.0948292	0.0613745	0.204255	0	0.324626	0.229124	0.36198	0.0884951	0.0741341
NM_001042513,NM_001042514,NM_001042523,NM_015762	71.7375	80.6192	73.9125	90.3148	106.648	85.8512	65.3763	64.1781	52.8672	82.3846	98.2245	78.2114	185.234
NM_025499	0.240425	0.367717	0.142586	0.283186	0.293559	0.282861	0.27693	0.180704	0	0.385223	0.192424	0.428411	0.515823
NM_021439	3.80454	3.75566	3.47618	4.08106	4.91322	5.18815	4.47804	4.83578	3.76957	5.16458	5.09592	4.82786	12.3584
NM_026579	11.5364	11.7211	11.4089	12.2469	19.4191	7.95238	7.08161	11.8933	10.5215	6.79308	7.67465	13.2052	18.8966
NM_001033375	18.2217	19.3788	17.9929	18.3775	20.8928	22.204	23.0995	22.0288	25.4798	24.7129	23.3658	22.21	24.8953
NM_001145198	11.7472	12.3797	11.3813	10.7319	11.5574	9.0905	6.78464	10.6357	11.9115	7.28012	7.75527	14.3254	9.75022
NM_146008	3.28749	3.33089	3.6817	3.6342	3.28648	6.08222	4.65499	15.0114	21.0702	3.39476	3.14882	17.9151	20.4976
NM_027423	8.10903	8.22367	8.1975	8.20065	8.17708	8.26826	6.74976	9.27869	9.28165	8.21734	7.39877	8.11471	10.8499
NM_001024918,NM_027689	0	0.00487412	0.00350397	0.00393836	0.00772707	0	0	0	0	0	0	0	0
NM_001013441,NM_183172	5.25715	5.43324	5.41797	5.24727	5.54498	5.66843	5.89003	5.76458	6.61539	5.99355	5.42866	5.08505	5.93219
NM_001013028	30.9912	34.6552	33.6747	33.0748	35.6852	49.4018	40.9014	32.9534	32.221	43.2618	48.5149	31.9628	33.9661
NM_001017525,NM_028709	2.46104	2.26369	2.14351	2.27391	2.79514	2.42277	2.48844	3.19542	1.87548	2.2723	2.70295	2.69863	2.77939
NM_133993	20.0999	21.1939	20.2381	22.3101	28.7393	21.2844	14.4268	18.483	14.922	19.201	20.5065	18.7401	24.0297
NM_001163614	0.0102781	0	0.012967	0.0127826	0.0136787	0	0	0	0.102143	0	0.0830193	0	0
NM_153195	6.74255	6.31101	6.653	6.28558	5.92908	5.79632	5.86071	6.88295	5.94982	5.92252	4.41465	6.21295	6.42496
NR_038024	0	0	0	0	0	0	0	0	0	0	0	0	0
NM_011595	154.081	159.761	153.616	172.523	224.97	196.451	139.298	170.525	166.297	235.061	434.857	241.451	276.427
NR_015572	1.00911	0.91778	0.895635	1.0158	0.781348	0.547579	1.07976	0.64839	1.18854	1.17028	0.582672	0.75603	0.710784
NM_001003910,NM_001003939,NM_153595	0.516749	0.551475	0.566984	0.410068	0.358299	0.414547	0.600992	0.795688	0.654138	0.463913	0.37194	0.802185	0.157953
NM_175331	8.78475	9.31556	8.73821	10.3693	13.6243	10.4834	8.51992	9.9911	8.7613	10.6457	14.8174	13.8217	18.6534
NM_029685	0	0.0132129	0	0	0	0	0	0	0	0	0	0	0
NM_008777	0.0124353	0	0.00633815	0	0	0	0.0845019	0	0	0	0.0362402	0	0
NM_001111274,NM_001111275,NM_001111276,NM_010512,NM_184052	121.679	117.976	115.766	119.173	99.0174	78.8998	78.2474	99.8333	93.6951	93.3116	72.4691	95.5111	79.8531
NR_000040	1.31657	1.39347	1.212	1.61081	1.34002	0.994234	1.18266	0.838319	0.515399	0.75454	0.654004	0.852078	0.496242
NM_029971	0.33222	0.437347	0.166711	0.219313	0.412373	0.153163	0.867704	0.0414847	0.681645	0.412685	0.586537	0.286595	0.953672
NM_027191,NM_028334	11.1255	10.5428	11.4491	10.3221	12.44	9.21792	9.68931	5.92402	6.56755	7.77288	7.92144	6.63749	6.72993
NM_001122960,NM_026070,NM_027487	29.3751	29.2457	25.703	28.7053	24.1634	29.3471	28.9011	37.2319	32.1136	26.5869	27.9076	41.5859	28.7967
NM_001004164	13.8728	13.1904	13.1401	13.3109	13.6454	13.0824	14.0405	15.3124	13.1549	14.962	11.3369	13.6713	14.0666
NM_011517	0.245931	0.536714	0.482461	0.206338	0.584099	1.01302	0.854374	0.783719	1.19077	1.53325	1.42887	1.06328	0.481481
NM_025859	115.206	114.185	117.141	115.968	124.223	138.778	120.857	131.606	128.349	119.159	145.289	138.388	137.127
NM_145423	0.528778	0.567494	0.508381	0.584114	0.456664	0.531418	0.440508	0.387306	0.615431	0.466385	0.289569	0.662285	0.52471
NM_029166	12.8069	14.1018	13.9329	13.4958	19.0213	18.5253	18.0291	13.8218	15.4083	20.2374	27.829	13.5506	23.0195
NM_001128086,NM_001177396,NM_001177397,NM_001177398,NM_181398	1.50436	1.57964	1.38718	1.38942	1.38865	1.67311	1.69983	2.09076	2.1913	1.73738	1.22528	2.13044	2.2263
NM_026166,NM_027078	75.544	76.1324	77.1071	74.821	82.0507	76.8171	73.1317	86.5509	77.792	73.8303	73.3073	87.6342	71.0352
NM_146239	11.795	13.1906	12.2126	12.7291	19.6781	13.5449	14.1331	10.7264	11.5115	15.3903	17.7223	12.3498	21.9888
NR_035452	0	0	0	0	0	0	0	0	0	0	0	0	0
NR_038014	0.0345922	0.0465515	0.0358116	0.0188073	0	0	0	0	0.300568	0	0	0	0.0973893
NM_008517	38.7063	36.6792	37.9057	38.8507	40.3302	32.8899	34.8197	39.5405	34.9988	29.6261	43.2514	39.756	40.0113
NM_010401	0.0208565	0.0288033	0.0229745	0.00524093	0.0101391	0.039941	0.150674	0.101131	0.0757114	0.178423	0	0.124965	0.0368464
NM_175488	0.232222	0.268089	0.204933	0.223453	0.250456	0.270689	0.206588	0.179228	0.0737328	0.179274	0.0638541	0.195417	0.0462547
NR_045810	0.0702173	0.135245	0.0745037	0.0457129	0.150139	0.094775	0	0.0598639	0.0362743	0.0790916	0.085322	0	0
NM_021320	16.8269	16.5467	18.7169	19.3679	18.6481	13.662	15.5484	12.0227	15.0359	15.5716	18.4154	13.2164	15.3602
NM_001206851,NM_183199	0.107886	0.0560779	0.0518847	0.0953382	0.156298	0.473321	0.187096	0.262511	0.427935	0.665373	0.455924	0.469733	0.286879
NM_053072	1.21895	1.16361	1.23413	1.15998	2.07811	0.836642	0.775321	0.902513	1.00456	0.968947	0.878711	0.981251	2.14493
NM_011629	6.17316	5.95205	6.08085	5.1835	5.72943	6.81672	6.49349	6.49311	7.35295	5.88951	6.45819	6.30807	7.00921
NM_025551	29.8103	30.3942	29.5834	31.43	29.3012	22.6458	19.4022	21.9724	23.231	21.8019	23.3887	25.4938	26.1087
NM_001168684,NM_172051,NM_177026	9.29083	9.61482	9.71165	11.8461	29.513	4.22176	4.22747	6.29432	7.07836	6.41683	8.49316	7.80594	34.0262
NM_029852	7.01817	7.70378	6.93891	7.24206	9.09005	10.8135	12.1284	8.70964	9.69473	13.2778	12.2422	9.64369	12.6061
NR_045337	0	0	0	0	0	0	0	0	0	0	0	0	0
NR_045338,NR_045339	0	0	0	0.0141198	0	0	0	0	0	0	0	0	0
NM_080560	6.01814	6.31854	5.94844	6.39255	7.55049	4.99984	4.65753	4.64765	3.5804	5.36391	5.83762	5.61099	4.97055
NM_001001932	8.41224	8.70393	7.61395	8.26838	13.607	13.3934	10.9546	10.2246	11.3488	18.1051	13.5754	11.8773	20.7679
NM_007569	20.1597	23.4757	18.5518	23.7193	19.317	19.0366	17.8709	37.0859	32.2385	19.9709	15.0657	55.6342	25.7783
NR_045358	0	0	0	0	0	0	0	0	0	0	0	0	0
NR_039547	0	0	0	0	0	0	0	0	0	0	0	0	0
NM_001190451,NM_007833	42.6701	41.1252	38.2935	38.8466	38.1699	53.7468	60.4961	68.0511	63.8146	48.7412	57.6069	67.7278	64.0723
NM_008524	23.6373	22.2555	19.6172	20.6856	20.7024	33.6979	35.0242	30.3101	23.9584	29.5661	34.21	33.8936	24.6681
NM_008438	0.027636	0.00603224	0	0.00684863	0.00742941	0.0585336	0.0469489	0.113451	0	0.0653699	0.0402697	0.183137	0
NM_007884	0.486127	0.385569	0.415706	0.334236	0.410676	0.37323	0.216359	0.56414	0.372587	0.353447	0.5318	0.415489	0.351974
NM_025724	0	0	0.00648331	0	0	0	0	0	0	0	0	0	0.056676
NM_026482	17.4264	18.521	18.4084	17.587	22.7305	21.8606	17.656	20.8483	22.1311	23.4681	24.9705	19.1938	31.9514
NM_027740	2.73845	2.7566	2.56168	2.49017	2.91766	2.57341	2.25125	2.90453	3.34189	2.20796	2.28966	2.26048	3.82707
NM_015737	6.0879	6.13649	5.85983	5.60836	8.2575	4.75234	4.58098	6.16426	4.68209	5.21653	5.13671	5.90689	7.50734
NM_026268	10.917	12.9126	10.935	35.8371	51.8018	0.891446	0.996477	16.2046	12.0622	2.45703	2.15956	74.1365	109.436
NR_038019	0	0	0	0	0	0	0	0	0	0	0	0	0
NM_013598	2.16872	2.09675	2.01045	2.2433	3.49025	3.20516	2.31565	3.27744	2.83456	3.18046	2.64833	3.89138	6.0893
NM_001166637	0	0	0	0	0	0	0	0	0	0	0	0	0
NM_001166639	0	0	0	0	0	0	0	0	0	0	0	0	0
NM_001166634,NM_001166639,NM_001166641	0	0	0	0	0	0	0	0	0	0	0	0	0
NM_001166637	0	0	0	0	0	0	0	0	0	0	0	0	0
NM_146009	1.91083	1.86093	1.58032	1.71917	1.86375	2.69383	2.9173	1.74919	2.20561	4.3846	1.88803	2.47382	1.96009
NM_001081246	0	0	0	0	0	0	0	0	0	0	0	0	0
NM_001162368,NM_001162369,NM_001205098,NM_026243	0.0188253	0.00762605	0.0101644	0.00674823	0.00775052	0	0.0625275	0	0.027325	0	0	0	0
NR_037211	0	0	0	0	0	0	0	0	0	0	0	0	0
NM_146240	0.376413	0.313269	0.4424	0.254245	0.130952	0.618717	0.857517	0.57056	0.768259	0.593994	0.2702	0.63045	0.442969
NM_001252330,NM_175328	2.00002	2.09079	2.02707	1.80141	1.94072	1.78935	2.37176	1.46179	1.50291	2.21958	1.95789	1.79119	0.768122
NM_001177535,NM_001270642,NM_001270644	0	0	0	0	0	0	0	0	0	0	0	0	0
NM_001270642	0	0	0	0	0	0	0	0	0	0	0	0	0
NR_038032	1.7768	1.84487	1.54876	1.62956	1.26871	1.08171	1.17982	1.03253	1.32223	0.991712	0.650835	1.04818	0.605543
NM_025602	23.761	25.9448	24.4175	23.5862	28.0539	26.0096	29.6283	24.6724	25.0851	27.3616	29.4398	23.0341	23.6396
NM_001205341,NM_177373	0.190403	0.170385	0.139033	0.156278	0.12318	0.189056	0.200799	0.197031	0.2496	0.147719	0.155493	0.165775	0.165604
NM_001033223,NM_001039354	1.10115	1.09501	0.850437	0.854849	0.801938	0.77342	0.852599	0.733806	0.470952	0.857009	0.898811	0.571163	0.515681
NM_027892	43.3886	45.3162	38.6228	43.7136	38.9093	62.7699	49.5426	39.3967	48.2972	64.0151	57.7268	40.3796	43.3749
NM_054056	58.7858	67.9201	60.7984	66.0678	60.3354	47.272	35.1277	30.0914	36.2175	49.3269	32.5378	30.8493	26.2721
NR_028438	0	0	0	0	0	0	0	0	0	0	0	0	0
NM_178609	3.43951	3.52799	3.04428	3.65264	3.47426	3.57455	2.54159	1.59528	1.63693	3.41476	3.28421	1.5407	1.94003
NM_007792	133.821	147.663	159.654	162.065	141.966	171.423	139.7	117.84	170.578	158.347	192.493	149.253	162.558
NM_001003717,NM_175489	8.53713	9.53226	8.43783	9.24589	10.4955	11.0654	11.3274	9.52962	12.1681	11.5607	13.1219	10.2916	13.1651
NM_027914	1.49722	1.08503	1.4976	0.757306	1.03709	1.02695	1.72593	1.15969	1.99759	1.02493	0.567133	0.815759	1.16838
NM_001146707,NM_015781	33.6064	34.7899	34.5135	33.7022	39.6211	33.6043	30.8636	31.4531	31.7459	31.5685	32.3813	35.603	36.0566
NR_033603	0.0563755	0.030459	0.0667522	0.150928	0.259016	0.445845	0.474124	0.230963	0	0.660154	0.227681	0	0.181532
NM_009344	12.6375	15.4179	13.4057	37.8123	36.651	2.21057	2.49528	7.89266	6.60752	9.55273	5.81093	40.7664	40.7792
NM_178610	7.44891	8.08752	7.63168	7.59839	10.2354	8.17289	7.89745	6.80793	6.64739	7.85027	7.93039	7.21603	8.12381
NM_027018	0	0	0	0	0	0	0	0	0	0	0	0	0
NM_026223	0	0	0	0	0	0	0	0	0	0	0	0	0
NM_178278	0.00452097	0.0129282	0.0175641	0.00466956	0.00506555	0.0399096	0	0.11603	0	0	0	0.0416224	0
NM_001025581	0.0615641	0.0459762	0.0432561	0.0452008	0.0389597	0.0771533	0.0544936	0.102472	0.152132	0.159329	0.0990783	0.060334	0.120074
NR_040579	0	0	0	0	0	0	0	0	0	0	0	0	0
NR_035418	0	0	0	0	0	0	0	0	0	0	0	0	0
NM_001033261	10.8827	11.7829	11.287	9.44592	10.2717	20.1777	20.8792	16.6133	13.409	21.3183	15.4158	16.5531	11.9912
NM_029982	0.0122228	0.0132077	0	0.0168168	0.0181998	0.065168	0	0	0	0	0	0	0
NM_001168679,NM_001168680,NM_146010	0.0205675	0.0192437	0	0	0.0110586	0	0	0	0	0	0.067121	0.268607	0
NM_001161837,NM_001161838,NM_001161839,NM_001161840,NM_011217	0.020118	0.0540329	0.0433935	0.0179363	0.0114428	0.127638	0.0710523	0	0.067692	0.0280248	0	0.0976444	0
NM_029928	30.8597	30.4552	30.175	33.2136	41.279	27.4907	20.6556	22.4071	25.7791	34.0295	23.7712	24.0571	36.5198
NR_028107	0.0311368	0	0	0	0	0	0	0	0	0	0	0	0
NR_038025,NR_038026	6.29196	6.37451	6.7208	6.10059	8.41217	6.08079	5.42738	5.27312	7.01375	5.046	4.0594	6.45136	8.53932
NR_027846,NR_027847	0.140252	0.109746	0.125843	0.113909	0.0812788	0.0797818	0.0848484	0.329043	0.261946	0.126004	0.0771279	0.0387766	0.0812752
NM_001007583	0.026162	0.0543001	0.0239323	0.0202023	0.0563247	0	0.0228808	0.0393098	0	0.0709671	0.0312474	0	0
NM_146242	0	0.0209141	0	0.00992859	0	0	0	0	0.0485987	0	0	0	0
NM_027468	0.298187	0.338186	0.338626	0.337662	0.321366	0.286965	0.324704	0.329663	0.277451	0.271828	0.0875626	0.307114	0.275882
NR_045342	0.067812	0.0952858	0.070252	0.0239386	0.0255555	0.0346784	0.164104	0	0.208467	0.129462	0.105074	0.0500023	0
NM_001162904,NM_001162905,NM_010785,NM_148922	1.45127	1.35275	1.36474	1.35301	1.41528	1.2646	1.61785	1.19554	2.29839	0.937875	0.750401	0.670644	1.94955
NM_016971	0	0	0	0	0	0	0	0	0	0	0	0	0
NM_008337	0	0	0	0	0	0	0	0	0	0	0	0	0
NR_045348	0	0	0	0	0	0	0	0	0	0	0	0	0
NR_040578	0.0311862	0.0438807	0.0184602	0.0177282	0	0	0	0	0	0	0	0	0
NM_001277292,NM_001277293,NM_001277294,NM_001277295,NM_028736,NM_130891,NM_133442,NR_102387	4.94677	5.26804	4.43755	5.04028	3.87642	5.29354	4.01543	5.28255	3.8869	5.25364	4.28429	6.22343	3.28331
NM_026617	80.1529	81.1311	83.8591	82.8862	88.514	79.7778	64.7133	89.7397	87.2475	67.0006	91.6612	92.9155	89.5495
NM_025431	5.63438	5.95772	5.5538	5.76401	8.58003	3.40685	3.38733	4.94283	4.45938	4.70479	5.04991	5.90236	6.22593
NR_040626	0.0517029	0.0616666	0.0181741	0.0422944	0.0771409	0	0.0400302	0	0.0762776	0.0557367	0	0.0520496	0.122735
NR_038000,NR_038003	0.134581	0.16461	0.223559	0.201254	0.149489	0.522267	0.281459	0.31952	0.298776	0.166647	0.287375	0.187216	0.0458253
NR_038023	0.270166	0.256186	0.213003	0.290217	0.28345	0.68226	0.567735	0.222189	0.39401	0.41538	0.110448	0.4765	0.362278
NM_011915	0.10645	0.0634306	0.110315	0.0610829	0.152397	0.125687	0	0.0971138	0.240426	0.087661	0.0385978	0.0367358	0.446656
NM_029364	81.7089	83.0292	83.6835	81.6073	80.6175	84.6837	66.876	108.691	97.7476	74.8252	81.8672	94.4463	100.162
NM_177335	0	0	0	0	0	0	0	0	0	0.0353174	0	0	0
NM_173022	3.59494	3.60452	3.90684	3.26752	4.68096	3.08786	3.14455	2.76487	2.96132	3.37578	3.60964	2.13641	3.45274
NR_027637	0	0.0391519	0	0	0	0.33229	0	0	0	0	0	0.243629	0
NM_016847	0.241841	0.309092	0.323787	0.32768	0.444024	0.12547	0.45563	0.104712	0.144061	0.12469	0.390308	0.0734512	0.0762016
NM_001110218,NM_176919	1.39242	1.41833	1.48881	1.62057	1.30004	0.939319	1.35935	0.975727	0.92227	1.1837	1.49728	1.02024	0.854867
NM_001252387,NM_182807,NR_045514	5.50602	6.12147	5.5263	6.35527	4.96511	4.25863	1.84326	3.66198	3.0979	4.94886	2.11392	3.56051	3.07685
NR_028310	0	0	0	0	0	0	0	0	0	0	0	0	0
NM_177152	17.5658	16.1369	17.6263	15.9438	13.8161	14.8296	19.1294	13.864	15.9033	13.014	11.8351	12.5826	11.3723
NM_001113470,NM_146012,NR_029803,NR_030259	265.992	305.002	336.177	336.683	395.602	177.807	242.962	335.654	67.0543	36.0919	287.392	51.713	228.151
NM_009635	0.339062	0.289023	0.258056	0.20341	0.127007	0.488128	0.601718	0.742532	0.978367	0.309947	0.379824	1.2569	0.509448
NM_010792	21.3497	21.1693	22.287	22.4402	20.8316	20.447	20.1061	23.6799	15.1731	18.9613	20.7359	21.0372	15.1286
NM_010009	0.141124	0.143	0.105398	0.113923	0.174394	0.115492	0.258498	0.483579	0.301115	0.205671	0.134283	0.403627	0.268698
NM_009870	262.504	261.172	257.493	263.184	260.317	191.552	187.084	191.402	161.384	175.552	201.566	210.59	166.84
NR_040660	4.38309	4.36014	2.96835	4.37214	2.92512	3.94629	5.54153	4.41591	3.67809	2.07743	2.47154	6.096	1.07119
NM_001033263	0.0535807	0.0413778	0.0337036	0.024755	0.0318706	0.0282837	0.0406541	0.087334	0.0819689	0.0328037	0.0128994	0.0470483	0.184303
NM_001244617,NM_001244618,NM_008080,NM_027739,NR_045166	12.9551	13.4464	13.1418	13.3042	14.908	14.0373	16.0309	14.8301	12.8965	12.8354	16.37	14.5406	17.6803
NR_045715,NR_045716	0.867294	1.09108	0.996605	0.81616	0.560477	1.37451	1.76375	0.868896	0.967385	1.59792	0.641939	0.632889	0.517841
NM_001190453,NM_001190454,NM_027151	106.835	107.293	109.688	113.2	98.5801	116.435	115.463	125.524	121.595	106.762	123.452	131.234	120.808
NM_007837	109.293	97.8157	113.457	126.247	83.8527	106.53	130.614	190.479	182.068	120.926	116.269	345.97	130.695
NM_146011	0.0314815	0.0365094	0	0.0149919	0.0319192	0	0	0	0.060307	0	0	0	0.0586991
NM_001168292,NM_001168293,NM_027900	21.0587	21.4154	19.9154	21.338	17.8849	21.4699	20.9487	26.1037	28.1385	23.2558	19.0995	24.1412	25.0685
NM_177707	0.281511	0.359474	0.445412	0.288119	0.281072	0.19562	0.942246	0.487782	0.543915	0.996076	0.298017	0.96872	0.217889
NM_001098789	0.238782	0.199515	0.232269	0.326333	0.169133	0.0689056	0.338009	0.605763	0.443135	0	0.0932282	0.141326	0.291473
NM_009284	27.3645	27.518	28.4871	27.854	28.651	25.7482	29.9388	22.0788	20.7082	27.2707	30.1263	20.6054	22.8687
NR_045171	0.777282	0.798967	0.686785	0.625178	0.374878	0.322382	0.935063	0.369951	0.523296	1.34524	0.941983	0.816155	0.714165
NM_001113211,NM_173732	2.10259	2.02102	2.14663	2.20673	2.0688	1.44229	1.90813	2.21377	2.67214	2.00146	1.69251	2.87345	2.71388
NM_001081219	0.0851773	0.0880877	0.0949457	0.0472447	0.0456319	0.129478	0.21826	0.201364	0.136532	0.237383	0.0472052	0.341268	0.0596442
NM_001199971,NM_009312	0	0	0	0	0	0	0	0	0	0	0	0	0
NM_198035	3.90842	3.69381	3.64743	4.27187	3.9243	4.541	3.83757	3.65567	3.98312	4.88198	3.83488	3.4093	4.25653
NM_080436	0.0524617	0.0122105	0.0334654	0.0538868	0.0355819	0.0557504	0.128877	0.0535735	0.0320951	0.0308688	0.0212928	0.0576537	0.0424759
NM_153133	0.256867	0.223229	0.234653	0.259365	0.210633	0.248213	0.269685	0.33375	0.648942	0.188818	0.210473	0.303281	0.502688
NM_009040	0.0074038	0.00349744	0	0.00402534	0	0.0339373	0	0	0.0321655	0	0	0	0
NR_037604	0.0126288	0	0.00356017	0	0.00840363	0	0	0	0.0171786	0	0	0.0308585	0
NM_147222	0	0	0	0	0	0	0	0	0	0	0	0	0
NM_145424	0	0	0	0	0	0	0	0	0	0	0	0	0
NM_027301	0	0	0	0	0	0.019608	0	0	0	0	0	0	0
NM_008921	6.8288	7.08986	6.18454	6.35003	5.9654	4.56387	5.10165	4.23849	3.92509	4.78912	4.24437	5.2109	3.43264
NM_001113199,NM_013608	69.4745	65.483	71.167	73.7592	68.2641	63.4328	55.1878	66.2103	64.4111	58.4145	60.2054	71.2332	66.2938
NM_019766	27.5597	30.4586	27.605	29.7839	35.5688	35.2309	30.2988	28.1588	26.0976	32.9811	33.2982	29.5701	29.5944
NM_016774	540.292	556.416	569.418	584.355	568.082	466.593	418.239	469.323	462.242	409.712	527.937	488.075	477.304
NR_030442	0	0	0	0	0	0	0	0	0	0	0	0	0
NM_054078	7.25514	6.90317	7.12041	6.84163	7.3032	8.81241	10.7768	6.53262	9.77613	10.4486	9.01694	6.63789	10.6747
NM_001033264	0.188679	0.161676	0.163641	0.229417	0.222915	0.160263	0.123613	0.325277	0.441135	0.272811	0.100827	0.316265	0.403188
NM_008600	0.010991	0.0310029	0.0231828	0.0455588	0.0291274	0.105353	0.0594278	0.0411639	0.130435	0.0333318	0	0	0.0647079
NM_001136082,NM_001164080,NM_001164081,NM_011589	2.67584	2.56251	2.33842	2.35034	2.09294	1.49189	1.59756	1.69344	1.73381	1.84478	0.956325	1.28802	1.50808
NM_133996	0.14023	0.0797922	0.0163465	0.0616852	0.0833319	0.0736059	0	0.113118	0.0420208	0	0.0497939	0	0.133363
NM_133997	0	0	0.00624903	0	0	0	0	0	0	0	0	0	0
NM_019963	10.483	9.58544	10.1119	8.34399	6.81457	12.2986	16.6095	13.5694	14.1006	14.9552	8.53034	11.5312	7.46952
NM_001252326,NM_001252327,NM_133992	4.4279	4.53209	4.54904	4.11797	3.80314	5.45848	6.73664	5.60839	5.78802	6.84021	4.28163	5.37952	4.52579
NM_019953	84.4353	79.9729	82.5168	81.6619	67.2034	81.1565	70.2481	94.7744	85.6578	68.962	76.2841	101.847	70.3575
NM_026444	105.23	108.033	107.216	111.056	109.537	93.4908	83.8856	99.7442	87.2779	86.2393	97.9421	90.9852	96.0155
NM_172790	33.0497	32.5161	34.714	34.3478	34.2957	30.892	31.631	25.4433	26.2211	32.5459	34.9104	24.3676	30.3646
NM_001164237,NM_026259	20.0448	20.7165	20.1472	23.3011	18.4372	19.6301	19.2705	13.9421	17.0011	21.1556	23.6458	14.917	16.5525
NM_001114096,NM_001114097,NM_198160	34.1677	32.9265	33.1691	32.4047	27.2347	37.1834	47.8973	45.2668	42.0283	43.5632	35.1178	46.0609	38.5089
NM_021882	0.484399	0.445494	0.465542	0.441675	0.452059	0.374839	0.532417	0.588524	0.620811	0.252688	0.423188	0.731091	0.325864
NM_001170869,NM_001253704,NM_001253705,NM_030100	15.4148	14.8129	14.8399	14.0597	16.7683	13.0073	12.9802	10.4406	6.59702	12.4083	11.7717	10.732	14.0477
NM_001164197,NM_021412	3.16778	2.52901	2.5774	2.59062	2.93987	3.75316	4.63777	4.53668	3.12772	3.84839	3.77036	4.29084	3.44088
NM_028873	23.2612	22.879	23.1886	21.8074	22.1582	24.0988	24.5694	20.4788	22.6684	23.3087	28.1439	18.9022	24.1252
NM_025364	5.08663	5.49634	5.23517	5.06266	5.80653	5.37688	4.48089	4.83271	3.86081	4.71532	5.06843	5.12222	3.13001
NM_001042580,NM_007653	220.228	225.581	239.631	268.894	241.472	255.75	217.003	238.117	227.161	232.519	333.492	276.901	324.007
NM_008398	6.2839	6.48652	7.09354	6.73297	8.41071	6.95339	8.26799	7.27952	7.94579	8.40315	23.6317	6.98777	16.3667
NM_146861	0	0	0	0	0	0	0	0	0	0	0	0	0
NM_146862	0	0	0	0	0	0	0	0	0	0	0	0	0
NM_207620	0	0	0	0	0	0	0	0	0	0	0	0	0
NM_146545	0	0	0	0	0	0	0	0	0	0	0	0	0
NM_207559	0	0	0	0	0	0	0	0	0	0	0	0	0
NM_146284	0	0	0	0	0	0	0	0	0	0	0	0	0
NM_146728	0	0	0	0	0	0	0	0	0	0	0	0	0
NM_001011797	0	0	0	0	0	0	0	0	0	0	0	0	0
NM_146729	0	0	0	0	0	0	0	0	0	0	0	0	0
NM_146549	0	0	0	0	0	0	0	0	0	0	0	0	0
NM_001011822	0	0	0	0	0	0	0	0	0	0	0	0	0
NM_146551	0	0	0	0	0	0	0	0	0	0	0	0	0
NM_146933	0	0	0	0	0	0	0	0	0	0	0	0	0
NM_146930	0	0	0	0	0	0	0	0	0	0	0	0	0
NM_001011849	0	0	0	0	0.0163791	0	0	0	0	0	0	0	0
NM_146378	0	0	0	0	0	0	0	0	0	0	0	0	0
NM_146927	0	0	0	0	0	0	0	0	0	0	0	0	0
NM_146548	0	0	0	0	0	0	0	0	0	0	0	0	0
NR_030454	0	0	0	0	0	0	0	0	0	0	0	0	0
NM_001011821	0	0	0	0	0	0	0	0	0	0	0	0	0
NM_146928	0	0	0	0	0	0	0	0	0	0	0	0	0
NM_146324	0	0	0	0	0	0	0	0	0	0	0	0	0
NM_207147	0	0	0	0	0	0	0	0	0	0	0	0	0
NM_146675	0	0	0	0	0	0	0	0	0	0	0	0	0
NM_146776	0	0	0	0	0	0	0	0	0	0	0	0	0
NM_146671	0	0	0	0	0	0	0	0	0	0	0	0	0
NM_183264	0	0	0	0	0	0	0	0	0	0	0	0	0
NR_045946	0	0	0	0	0	0	0	0	0	0	0	0	0
NM_001204916	0	0.00402285	0	0	0	0	0	0	0	0	0	0	0
NM_001033466	5.33666	5.62845	5.92445	6.23635	6.73635	5.90335	4.6327	4.70907	4.8578	5.19828	4.69344	4.87074	6.35274
NM_025343,NR_002891	2.92035	2.67424	2.58857	2.8754	1.86932	1.60118	3.54271	2.6966	2.93877	3.41011	2.51037	2.28664	1.69967
NM_001079686,NM_022027	7.33007	7.43603	6.37887	6.85418	7.04866	12.804	9.86501	8.20449	5.41241	15.3426	7.12173	9.42394	5.42452
NM_153399	0.100532	0.0817495	0.0606384	0.0891067	0.119491	0.218317	0.162753	0.05256	0.0743462	0.188889	0.0978996	0.106654	0.0184412
NM_025995	8.26881	8.51261	7.73693	7.35244	8.3403	5.84923	5.95738	3.97798	5.32222	5.16908	4.01797	4.58984	2.97902
NM_175374	3.31645	3.41434	3.80814	3.518	4.56467	3.00587	3.84394	2.9744	3.156	3.12082	2.95744	2.77068	3.48945
NM_001161822,NM_019958	7.01832	7.25334	7.71357	7.23566	14.2211	7.39066	9.78169	6.39169	7.46592	9.03217	11.1462	8.30597	19.4442
NM_001033391,NM_001170800,NM_001170801,NM_001170802	0.0264795	0.00893489	0.0386918	0.00918366	0.052127	0.0193032	0.059714	0	0	0.130235	0	0.0139165	0
NM_172546	5.35194	5.49365	5.30217	5.60576	4.58134	7.15447	7.51483	7.39948	5.90605	8.41242	8.0753	8.06377	5.22418
NM_029975	0.642053	0.72539	0.508374	0.714237	0.750827	0.951827	1.44976	1.19148	0.783852	1.30096	2.1478	1.22253	1.45985
NM_008786	34.1984	34.1149	36.3027	35.9573	37.8672	29.0808	28.1674	27.2655	27.2909	27.85	34.8583	31.4951	29.2952
NR_033219	1.85569	2.06656	2.05265	1.99614	1.83128	3.46896	4.15549	2.84332	2.41692	3.02179	2.14579	2.3032	2.04044
NM_145418	35.7945	35.8986	34.56	33.7778	36.3783	33.1662	30.6018	36.6993	42.9766	32.4692	34.5234	41.4132	43.3412
NM_138667	52.7317	56.3369	50.256	53.4456	44.3475	68.6576	58.1099	54.1969	58.8106	72.1357	54.3657	51.1253	44.9712
NM_177387	9.89876	10.388	10.1723	10.6822	8.3986	9.81123	9.80969	11.0559	9.29167	8.74644	10.2089	10.4833	7.79481
NM_175155	12.3709	12.2737	12.4755	11.6659	12.5282	16.226	14.0268	11.6158	10.5292	16.0985	17.5598	9.32547	9.88507
NM_177271	10.0953	10.2602	10.0017	9.83879	15.2132	10.042	9.53938	9.62516	6.55196	10.3041	8.05674	10.1853	17.8001
NM_001081344	2.5987	2.56027	2.71243	2.41484	2.75472	2.65274	3.75738	2.25341	3.0505	3.67244	2.93982	2.19354	2.53371
NM_001127353	0.0159529	0.00657745	0.0188379	0.00478409	0.0078232	0.0409542	0	0	0.0117885	0.0483725	0	0.0211762	0
NM_026405	21.5622	21.2952	20.9897	21.2337	17.7216	18.9152	18.0408	18.7561	14.6249	17.2715	22.4041	15.3151	11.4207
NM_001114333,NM_016976	0.0260649	0.0230048	0.0379147	0.034763	0.00584608	0.0380766	0.0121721	0.0237253	0.0143848	0.00960091	0.0233882	0.0427921	0
NM_011682	24.0229	21.129	21.2389	21.2044	26.7965	24.7241	24.7221	23.4401	25.3987	28.3057	28.9019	23.8548	32.5247
NR_038027,NR_038028	0.298967	0.404747	0.389695	0.356088	0.241957	0.29134	0.569174	0.519188	0.440324	0.203192	0	0.121125	0.249809
NM_001163590,NM_001163591,NM_029075	5.18897	5.96571	5.13777	6.53788	7.48239	4.53854	5.41081	3.94738	4.21243	5.21367	8.58546	4.00651	10.1455
NM_029172	0	0.0124833	0.0149608	0.0143676	0	0	0	0	0	0	0	0	0
NM_181470	31.7646	33.0786	30.5975	31.4282	36.3167	33.8558	28.1077	28.8971	15.102	33.135	31.341	27.3157	23.9151
NM_001033257,NM_001195065,NM_001195066,NM_001195096	6.31593	6.15636	5.55656	5.73215	3.94015	7.2407	7.1029	8.49771	6.63294	8.86208	3.43954	7.27218	3.93454
NM_001164195,NM_019961	11.3345	10.8265	10.1008	10.2273	10.2787	13.1868	13.3083	14.4594	10.8309	14.4214	11.1669	13.2677	12.1511
NM_025446	9.94839	9.79348	10.8114	11.1565	16.7073	8.98603	6.66485	10.5027	10.106	8.88545	8.38933	9.61246	17.1394
NM_001002268	40.2046	40.717	35.2381	38.8363	35.3462	33.2391	29.8262	45.5116	34.2955	35.5043	33.539	44.4773	30.539
NM_025418	32.4528	32.9241	33.4212	35.5072	35.8595	30.8519	24.7796	34.8864	34.7863	30.5177	35.1249	40.6949	38.5946
NM_029722	0	0	0	0	0	0	0	0	0	0	0	0	0
NR_038020	0.0475105	0.0206555	0.0505058	0.0581259	0.0287581	0.0162116	0	0	0	0.0201738	0.0929883	0.0233753	0.0195819
NM_001033432	11.3415	12.2759	11.7924	12.475	11.8596	15.7514	12.1804	17.4788	21.8254	15.1267	16.2744	19.1949	19.0065
NM_028440	150.203	164.533	154.766	169.374	178.121	183.391	145.575	134.067	122.603	163.118	179.637	156.031	112.243
NM_001195036	0	0	0.0045517	0.00496384	0.0155456	0.0192357	0.0303422	0	0	0	0	0	0.0232348
NM_144820	4.79366	4.45392	4.19555	4.65803	3.52403	4.25378	6.93063	6.64068	11.9849	4.86774	3.86242	8.53193	7.4463
NM_019487	14.2211	13.6945	14.9201	14.6524	12.7507	11.4875	11.2913	10.3925	9.38812	10.7204	12.154	11.3945	7.74972
NM_001033258	0.221997	0.183433	0.183532	0.205716	0.243681	0.12224	0.260531	0.136137	0.0776243	0.189528	0.570878	0.0637218	0.156066
NM_177706	0	0	0	0	0	0	0	0	0	0	0	0	0
NR_038034,NR_038035,NR_102728	0	0	0	0	0.00607046	0	0	0.122192	0	0	0	0	0
NM_001166402,NM_009397	2.99282	3.46509	3.38111	3.93619	6.25911	0.442865	0.786866	1.98437	1.85955	0.644944	0.876187	2.34519	3.75492
NM_029529	0.155104	0.15526	0.13327	0.141112	0.288558	0.148333	0.14871	0.040775	0.119634	0.0798701	0.0903047	0.105577	0.323285
NM_001161825,NM_008822	8.95033	9.07428	8.55942	9.51802	8.92153	8.30709	7.10586	8.40635	10.2627	8.53879	6.24951	8.77347	10.6321
NR_045350	0	0	0	0	0	0	0	0	0	0	0	0	0
NM_013875	0.799335	0.816226	0.775626	0.728159	0.48081	0.810248	1.12511	0.833619	0.644515	0.697876	0.8595	0.895296	0.430928
NM_001198914,NM_010848	0.0619845	0.0394231	0.0348446	0.0374069	0.0521216	0.0316914	0.0357533	0.0307124	0	0.0353929	0	0.0795234	0.0175153
NR_045352	0.384263	0.434815	0.301711	0.529565	0.263859	0.534453	0.706208	0.160354	1.09558	0.860483	0.643748	0.89717	0.586994
NM_053264	0	0	0	0	0	0	0	0	0	0	0	0	0
NM_001254744,NM_001254745	1.24005	1.07809	1.35671	1.4523	1.4958	0.682682	0.806832	0.255186	0.809884	0.410573	0.394978	0.571278	0.716053
NM_011603	12.2108	12.4255	11.7943	11.6134	13.1973	13.7997	17.2405	10.966	13.77	13.1976	14.5202	12.0519	13.6478
NM_011545	0	0	0	0	0	0	0	0	0	0	0	0	0
NM_010167	14.5232	14.4878	13.3337	13.3685	10.0951	15.4295	17.2085	18.273	15.6533	19.4759	8.62628	17.3167	8.55084
NM_011295	1.63538	1.99757	2.02675	2.39273	2.0261	0.674634	0.754694	2.59317	1.72781	3.67303	1.23322	0.839299	3.39256
NR_037680	241.039	0	0	0	128.558	0	0	0	0	0	0	0	0
NR_037681	0	0	0	0	0	0	0	0	0	0	0	0	0
NM_001010828	0	0	0	0	0	0	0	0	0	0	0	0	0
NM_001010829	0	0	0	0	0	0	0	0	0	0	0	0	0
NM_001010837	0	0	0	0	0	0	0	0	0	0	0	0	0
NM_001010840	0	0	0	0	0	0	0	0	0	0	0	0	0
NM_001010831	0	0	0	0	0	0	0	0	0	0	0	0	0
NM_008813	0.599304	0.397242	0.532743	0.426411	2.34736	0.728353	0.558472	0.919115	0.901874	0.580555	0.485743	1.54627	4.82512
NM_134005	0.35643	0.324119	0.280422	0.303478	0.366432	0.646904	0.592928	1.17603	0.448963	0.328639	0.509514	0.668417	0.564386
NM_007482	0.00767348	0.0177718	0.0292993	0.0105576	0.0590855	0	0.0453856	0	0	0	0.0553539	0	0
NM_018747	3.64152	3.89777	3.53446	3.61981	3.19662	3.64569	3.84213	4.03118	4.10281	4.08128	3.14088	4.01409	4.55111
NM_001195596	0	0	0	0.0262114	0.0280488	0.112369	0	0	0	0.246796	0	0	0
NR_045349	0	0	0	0	0	0	0	0	0	0	0	0	0
NR_030449	0	0	0	0	0	0	0	0	0	0	0	0	0
NM_029881	5.03138	4.89204	4.99908	4.72309	16.4092	2.99536	2.1233	3.92522	3.67942	3.17233	1.9007	3.98417	14.7928
NM_172787	10.8582	10.1419	10.4636	9.21387	8.60459	10.2593	12.789	13.633	8.01835	11.244	9.45406	10.7479	8.10643
NR_033633	0	0	0	0	0	0	0	0	0	0	0	0	0
NM_008481	14.465	12.7566	12.5418	12.9316	12.6126	12.9855	11.347	12.6284	16.1578	12.9059	11.3612	11.6022	14.8589
NR_033601	1.44272	1.43959	1.45346	1.65272	1.22025	0.732431	1.40574	0.816232	0.704669	0.738894	0.989476	1.16443	0.821275
NM_026336	0	0	0	0	0	0	0	0	0	0	0	0	0
NM_001110196,NM_001110197,NM_001110198,NM_026518	15.3479	15.531	15.4905	15.1056	15.295	18.2357	15.964	18.722	17.3168	17.0056	17.1746	16.6296	16.6098
NM_028351	11.6853	11.4825	10.0662	9.7483	4.42693	8.02638	4.97587	11.8449	7.9781	8.46091	1.92204	10.419	2.00351
NM_001109747	2.86214	3.1785	3.23052	3.47533	2.74619	2.10057	2.04111	1.31414	1.67983	2.28173	1.72128	2.19409	1.01017
NM_028604	2.89165	2.99983	2.66559	2.85307	4.28237	3.13057	2.47053	2.53807	2.93929	2.39812	2.3371	3.14926	3.69791
NR_045008	2.05691	1.98667	2.16446	1.72702	1.71168	2.69164	3.29108	3.86643	3.09805	3.02609	1.6093	3.69469	1.56819
NM_025798	14.1223	13.6408	12.9919	12.7182	10.7494	11.821	14.6308	14.912	15.7092	11.0298	12.0354	17.8314	11.0819
NM_001111267,NM_172495	2.99501	2.78886	2.72332	3.56618	4.01837	3.02401	5.08542	2.87278	3.16032	4.22742	3.12174	4.71453	4.83774
NM_013904	2.79009	2.31573	2.58651	2.29223	1.63627	1.94662	4.41658	1.34013	2.36099	1.98749	1.61133	1.25928	0.660115
NM_009413	4.58759	5.07151	4.89409	4.97501	5.55166	4.86967	4.2276	5.37295	4.45375	4.24989	2.9635	6.3671	6.37649
NM_011509	34.3194	34.2351	38.2806	40.5679	33.9658	29.5812	24.5804	34.1905	45.2648	23.9001	30.3325	38.3421	43.6431
NM_001146349	9.41159	10.4371	10.26	9.63134	12.0202	11.3148	8.9751	8.80745	10.58	8.62524	8.47311	8.34079	12.5792
NM_001013411,NM_001025286	0.298989	0.323246	0.325278	0.278899	0.296001	0.324747	0.349132	0.729722	0.741389	0.243118	0.302847	0.650901	0.699607
NR_040657	0	0	0.0142784	0.00818015	0	0	0	0	0	0	0	0	0
NM_175448	0.0054579	0.00458076	0	0.00527217	0.00564174	0	0	0	0	0	0	0	0
NM_001101452	0	0	0	0	0	0	0	0	0	0	0	0	0
NM_028287	5.08753	4.84251	5.15022	4.66738	4.8047	6.72637	7.09694	2.87502	4.82059	5.75634	5.46178	4.40493	3.93576
NR_015526	0.200108	0.196586	0.179703	0.182536	0.17234	0.221757	0.318944	0.310702	0.221942	0.33974	0.261751	0.236635	0.155578
NM_025614	19.2429	21.3826	20.1406	22.7726	21.8166	17.8486	17.2008	14.1092	13.4878	19.7037	19.2755	20.6804	19.1417
NM_001081165	0.0195199	0.0328859	0.0243917	0.017902	0.011492	0.0147617	0.069855	0.0281338	0.0550299	0.101582	0.0223636	0.0425694	0.0267813
NM_178908	8.56909	9.32726	8.09012	7.58038	5.49712	10.6539	9.01446	6.96727	7.30093	9.4635	8.54294	5.48346	3.23852
NM_175449	0.0143766	0.0120662	0.0247116	0.0292508	0.0314877	0	0.0939109	0	0.110971	0	0	0	0
NM_172508	29.0837	31.0792	29.2136	30.2968	29.0059	34.3878	31.4807	30.3191	26.2737	32.3952	35.374	29.6011	25.6438
NM_176968	2.98473	3.51021	3.11818	3.18406	3.90656	3.6248	3.41447	3.02775	2.65649	2.90249	2.72551	3.09363	2.07141
NM_008538	143.084	150.443	140.16	137.29	143.822	120.712	122.407	208.144	147.215	126.68	82.8782	180.863	125.46
NM_001177783	0	0.0124685	0.0127678	0.0302261	0	0	0.0970421	0.11725	0	0	0	0	0
NM_183254	4.336	4.1559	4.43249	4.16056	3.41159	4.57429	3.5802	4.63694	3.90228	3.16044	2.26577	5.9093	2.6628
NM_001127376	0.0559489	0.0459839	0.0497979	0.0407012	0.0432322	0.0858353	0.135396	0.459093	0.0490024	0	0	0.0880247	0
NR_038037	1.5392	1.5804	1.2182	1.49736	1.32849	2.00979	2.24593	1.41956	2.40788	2.39744	1.47902	2.41632	2.49807
NR_033628	4.12749	4.14578	4.94259	3.32179	3.22704	2.61609	6.29333	4.67358	5.61135	2.79606	3.18142	5.03877	3.8006
NM_001163503	0.00602457	0	0.00605984	0	0	0.0249486	0	0	0	0	0	0	0.0301353
NM_001001489,NM_001113385,NM_001113388,NM_001173500	0.609868	0.604829	0.500412	0.519886	0.429673	0.492315	0.552155	0.93898	0.95324	0.566908	0.463735	0.467864	0.517767
NM_144821	0.104976	0.0970433	0.0743598	0.0857717	0.0416064	0.0412212	0.258323	0.192003	0.558216	0.16419	0.0635089	0.219638	0.0633454
NM_001114332,NM_028247	0.634067	0.682209	0.754175	0.768061	1.02221	1.1848	0.731513	0.767663	0.868104	0.952121	1.5202	0.988812	1.43569
NM_001042556,NM_023323	9.86741	10.5712	9.56072	10.0567	16.581	7.59622	6.38987	5.29252	5.51478	7.91774	9.51569	6.59571	10.1611
NM_026113	28.1483	27.0805	25.9848	27.8691	27.68	28.0934	27.5142	25.9987	14.9155	26.9509	29.064	28.8979	18.1727
NM_009665	6.76322	7.2254	6.82731	7.32446	9.65034	7.1225	5.55279	4.04809	3.55938	7.33468	7.86551	4.99171	4.62619
NM_027879	12.4883	12.4991	12.665	11.7162	14.4113	12.1515	12.8128	11.7241	12.9016	12.2459	13.4041	11.6986	12.9217
NM_199058	0	0	0	0	0	0	0	0	0	0	0	0	0
NM_133999	10.9601	10.2661	10.2667	10.839	9.399	13.3839	13.7141	12.8144	10.8686	10.4548	11.0824	11.452	8.94039
NM_009213	11.8099	11.7766	12.4045	12.0907	10.4168	11.4088	14.9855	14.7775	14.1943	11.3042	11.3718	14.8115	12.4864
NM_001177571	0.820757	0.849022	0.796536	0.826102	0.53656	0.344446	0.602358	0.367114	0.177618	0.64903	0.34742	0.331125	0.13555
NM_001243074,NM_001243075,NM_026643,NM_029132	3.10153	2.78194	2.76632	2.71571	2.29222	1.93594	3.16757	2.40087	2.6612	1.99317	2.02078	2.3846	1.63247
NM_001034858	0.0826419	0.0334245	0.0417834	0.0425547	0.0333385	0.0333252	0.159625	0.165942	0.138216	0.0520441	0.0150295	0.0683504	0.0469889
NM_019740	18.8404	15.4037	18.9838	16.5429	13.5559	21.7211	16.6039	22.4132	22.4753	21.7704	15.7205	26.0608	17.7438
NM_145743	2.61722	2.46103	2.4408	2.44095	2.2041	1.96046	2.56875	2.25341	2.19934	1.86074	2.63043	1.97618	1.45335
NM_152229	0	0.00396553	0	0	0	0	0	0	0	0	0	0	0
NM_175407	3.34592	3.39584	3.56913	3.37986	2.92406	2.40978	2.34634	2.3398	2.14571	2.73542	2.35403	2.04291	1.10073
NM_026411	14.2252	13.6737	14.1309	13.0023	15.0104	13.5749	14.43	12.0906	15.1015	13.0037	14.4817	17.5609	20.0458
NM_001081054	4.35146	4.13728	4.28278	4.24349	4.25916	4.05465	4.68826	3.5056	1.69963	3.96344	3.8101	3.10306	2.66691
NM_172393	0.147019	0.124288	0.14525	0.169037	0.220299	0.184358	0.276544	0.0767364	0.102628	0.21741	0.308603	0.0839092	0.234195
NM_007548	0.0366924	0.051555	0.0452115	0.0630664	0.089076	0.0314455	0.0612297	0	0.0195375	0.0590862	0.0141818	0.0453409	0.0443386
NM_001031772	0.0352044	0.0391984	0.0455917	0.0189792	0.0234926	0	0.0110452	0.0153014	0.0227365	0	0.015084	0.0816846	0.0120266
NR_046212	0	0.0115158	0.0110037	0.0266234	0.0531742	0.0786463	0	0	0	0.0659795	0.0401625	0	0.0480964
NM_001111268,NM_010349	0.264366	0.234575	0.242341	0.266822	0.161942	0.447571	0.883394	0.427332	0.545652	0.442678	0.660476	0.396612	0.403199
NM_029894	0	0	0	0	0	0.151611	0	0	0	0	0	0	0
NM_153071	0.170754	0.257882	0.191873	0.20036	0.137075	0.0391122	0.0433885	0.0601078	0	0.115958	0.109004	0.0965051	0.0236217
NR_045158	0	0	0	0	0	0	0	0	0	0	0	0	0
NM_011282	0	0.00145692	0	0	0	0	0	0	0	0.00894548	0.0108905	0	0.00868304
NM_001199272,NM_053187	15.7635	17.1677	16.0757	16.4354	16.4143	17.7202	17.7657	15.3919	18.9413	17.4357	15.4613	14.8391	16.9478
NR_037920	0.345544	0.261106	0.325441	0.335454	0.38879	0.653204	0.367053	0.326935	0.310919	0.246563	0.557233	0.155449	0.545277
NM_001204983	1.34885	1.28467	1.17424	1.08881	1.63382	1.46705	1.24015	1.37336	1.89065	1.91637	2.49565	1.08949	1.99184
NR_037973	0.0131206	0.0119012	0.00905197	0.00478383	0.0185766	0.00979985	0.0372008	0	0	0.012195	0	0.0200996	0
NM_027830	1.45038	1.42122	1.35763	1.326	1.36533	1.87608	1.59581	1.77692	1.66183	1.94642	1.46782	1.45381	2.48334
NM_001081428	1.26495	1.36619	1.29785	1.1092	1.32578	2.35276	2.09603	1.18597	0.990849	2.59371	1.5124	1.31796	1.55435
NM_008548	74.4606	75.533	73.4624	74.1925	73.0788	80.5068	64.6302	107.107	91.9476	83.2854	63.1085	104.004	72.6597
NM_001033385	1.18909	1.12338	0.888242	0.989322	0.824646	0.948207	1.2758	1.58105	1.41989	1.24366	0.620424	1.51156	0.848865
NR_045353	0.0435673	0.0235298	0.0872522	0.0495702	0.0253474	0	0	0	0.189276	0	0	0	0
NM_019760	168.733	179.979	179.095	190.775	184.574	205.582	192.762	228.716	240.497	183.378	222.528	234.997	234.699
NM_001081954	0	0	0	0	0	0	0	0	0	0	0	0	0
NM_001034869	0	0	0.00670634	0	0	0	0	0	0	0	0	0	0
NM_010100	0.0764019	0.077669	0.120451	0.0646171	0.0451796	0.0884439	0.143663	0.0742267	0.0448048	0.0982178	0.022583	0.0214935	0
NM_001024910,NM_001024911	9.10079	9.16216	8.56016	9.32642	11.3011	5.56007	4.44287	5.73806	8.51406	5.5641	5.03729	6.83635	9.17521
NM_010959	0.160362	0.194136	0.145778	0.241773	0.13334	0.123213	0.124207	0.0317357	0.0707347	0.193499	0.121794	0.114484	0.037465
NM_001033259	10.4151	10.6216	9.8854	9.48838	11.0837	9.65231	8.54407	12.9741	12.5432	10.22	9.0366	12.2723	14.1555
NM_029083	76.7389	68.6322	84.7161	80.4686	62.8892	65.4504	65.4272	25.7857	50.7956	64.9328	56.5039	17.2193	37.0642
NM_025514	43.562	45.275	46.3704	49.1743	41.9112	36.2532	33.3012	42.0973	42.8113	29.6885	33.2988	43.046	42.7137
NM_016803	0.37507	0.334969	0.405888	0.254429	0.209821	0.209062	0.386727	0.147551	0.0426566	0.259703	0.307644	0.0864543	0.137592
NM_001252635,NM_023370,NR_045556	0.0523879	0.0442455	0.0516247	0.0439735	0.0734833	0.0565197	0.038284	0.043509	0.0556693	0.0758013	0.0264726	0.033179	0.0717712
NM_023596	10.482	9.77331	10.793	8.73219	8.50434	8.66109	10.5028	8.86487	9.47866	8.16623	9.56808	7.63938	7.3806
NM_029770	23.6631	21.9673	22.7222	23.994	28.6643	16.7467	14.2576	20.6389	16.7686	15.849	11.9593	19.8287	29.0045
NR_033616	0	0	0	0.0186104	0	0	0	0	0	0	0	0	0
NM_009163	42.8095	45.2171	41.9066	46.4555	52.635	39.3124	33.7823	48.2628	47.817	35.8336	37.5106	53.9713	65.1162
NM_001081127	7.38026	7.6376	7.79861	8.4645	7.48926	4.35419	3.32901	4.99213	4.38311	5.15156	4.42695	5.36139	5.4163
NM_013753	4.37244	3.75496	4.45655	3.87873	4.26072	3.05621	4.40079	2.44472	3.12849	3.52227	2.40256	2.74553	3.89868
NM_010124	32.1973	32.5837	33.2144	33.6662	34.3015	26.9853	25.3866	28.5661	31.5392	23.5034	29.3497	28.334	37.841
NM_207000	25.4897	24.9591	24.089	24.3285	19.1785	22.9445	24.0605	18.5578	14.5311	21.8932	16.6066	18.9804	9.79241
NM_007731	0.0243989	0.0300616	0.0213208	0.0370222	0	0.0384714	0.0303422	0.169105	0	0.180243	0	0.0671884	0
NM_027251	1.06722	1.19111	0.823651	0.950071	0.519024	1.51797	1.76473	1.27524	1.40471	1.54599	1.05053	1.62201	1.17362
NM_197996	1.44133	1.43146	1.43694	1.43797	1.24093	1.45658	2.18065	1.07811	0.780313	1.55254	3.9963	1.21134	1.40903
[truncated: 21,287 more rows]
