# Supplementary material for: Receptor tyrosine kinases modulate distinct transcriptional programs by differential usage of intracellular pathways
Source: eLife. 2015 May 7;4:e07186. doi: 10.7554/eLife.07186 (PMC4450512; doi:10.7554/eLife.07186)
Supplement: Supplementary file 2. — Expression for all differentially expressed genes (Cuffdiff q < 0.1). DOI: http://dx.doi.org/10.7554/eLife.07186.015 [file elife07186s002.xlsx]

## Sheet: 1hrComparison
1 hr FGF up	Unstim_FPKM	1hrPDGF_FPKM	1hrPDGF_PD_FPKM	1hrPDGF_LY_FPKM	1hrFGF_FPKM	1hrFGF_PD_FPKM	1hrFGF_LY_FPKM			1 hr PDGF up	Unstim_FPKM	1hrPDGF_FPKM	1hrPDGF_PD_FPKM	1hrPDGF_LY_FPKM	1hrFGF_FPKM	1hrFGF_PD_FPKM	1hrFGF_LY_FPKM
ZFP36L2	28.2962	32.5401	7.46212	29.1304	81.9503	13.5811	84.8406			Zfp651	14.2941	13.5234	19.0303	13.6344	7.98558	18.9207	11.2549
LIF	7.43815	9.30846	6.7631	6.07215	16.7356	13.6026	17.7347			ARMCX4	10.3927	10.1766	11.8277	5.52682	6.47738	13.6273	4.81129
DUSP5	2.77388	4.62605	1.9568	4.18617	22.5696	4.8683	46.2228			ABCD1	8.04026	7.9879	7.44969	7.7816	4.41413	7.27245	6.62719
NAB2	29.9368	40.7437	29.7326	52.5012	75.8601	27.7036	89.6392			EBP	26.0629	27.3152	20.905	13.1551	16.661	20.8937	13.2006
SGK1	14.4199	21.1288	24.3697	26.5811	35.3105	16.3521	145.861			F8A1 (includes others)	5.33156	5.6343	2.92994	4.13372	3.09652	2.67886	4.10714
TGIF1	37.2868	42.059	28.495	42.6901	62.9565	27.7879	89.1391			HCFC1	25.8849	24.5212	23.3223	19.0244	14.9621	25.4723	15.814
ARID5A	2.46437	3.41988	3.8123	4.71015	5.36908	7.97334	9.90427			IDH3G	47.7464	49.8394	51.0038	53.6766	31.2903	47.8244	55.3507
MYC	26.9538	34.4093	6.06071	9.67333	54.6777	20.2368	54.2441			KCNJ2	6.81804	5.78716	4.50605	6.2945	3.07287	4.66309	3.35925
NUAK2	4.46503	6.18647	1.22292	3.09836	12.8287	2.49875	7.80107			PLXNA3	7.70676	7.67493	8.45628	10.3558	4.72826	9.23245	9.19206
ARC	0.769788	1.41524	0.32221	2.96423	19.1665	0.71008	68.6969			GDI1	62.1695	63.559	78.7734	83.4008	40.8942	99.6894	90.1232
ATF3	8.635	19.7688	41.165	14.676	56.1043	156.59	123.212			KDM5C	28.912	27.1509	29.961	26.4063	16.2701	31.3005	25.8238
ZFP36L1	27.6238	26.4123	35.9543	49.9344	39.8513	57.3764	104.363			MED12	9.36989	8.95963	9.82207	13.1169	5.12535	12.7416	13.9434
BTG2	31.191	40.0503	43.8942	46.4245	76.4218	116.541	189.695			CHST7	10.1497	10.7793	6.96299	8.41792	6.46718	6.1289	9.06158
EGR1	11.7116	23.4467	1.05393	55.3283	118.41	1.56426	395.475			TSPYL2	19.647	22.248	31.5767	21.2192	12.7283	49.5108	20.8912
EREG	2.07885	3.94386	3.17426	3.30658	6.88901	3.15057	18.1862			MAGEE1	15.462	14.9935	15.7777	15.2472	9.39092	15.6478	13.2713
FOSB	0.277911	0.829505	1.68541	1.28761	4.60774	1.28161	18.2226			OGT	33.5003	38.5347	53.7432	56.7864	22.8637	70.5948	63.2942
FOSL2	31.4283	39.598	94.4888	39.0945	65.0937	139.993	83.0824			USP11	13.1319	13.0406	12.1046	17.614	7.5716	13.815	17.2873
HES1	21.6192	32.4005	19.0577	37.1078	50.8759	17.0602	32.7515			ZDHHC9	35.1579	36.8731	34.7737	30.6147	23.8344	34.4605	26.7663
JUNB	13.0851	21.1676	20.1476	21.956	76.787	23.5306	137.395			KLF8	1.96066	2.20646	2.25306	0.988844	1.21615	1.89951	1.07419
LFNG	2.20552	3.2498	3.32639	3.26236	6.70341	3.2853	5.63816			TRAK1	10.8812	10.9336	9.36766	8.24677	6.77016	9.70685	8.37829
Nppb	2.8512	6.55991	4.1092	1.54368	13.6662	10.7685	13.1054			Kctd12b	0.524295	0.536666	0.269546	0.483255	0.236735	0.373174	0.327062
PIM1	8.20624	11.1842	9.65804	13.6987	18.7899	9.61469	39.8771			BCORL1	4.22517	3.56932	4.08552	2.04128	2.03775	3.50626	2.06501
SERPINE1	161.034	267.608	221.095	94.2241	513.723	407.342	513.091
SPRR1A	1.06947	0.88041	0.538377	0.551588	2.28337	0.532053	0.442796
PHLDA1	12.6375	15.4179	2.21057	7.89266	37.8123	9.55273	40.7664
CEBPB	12.7979	15.5417	14.0367	14.9426	27.3334	21.5789	20.4042
CH25H	1.77304	1.53875	0.67353	0.745345	3.23968	2.59946	1.32414
EGR2	0.534903	2.46681	0.166523	2.55164	12.2864	0.152612	28.0977
EPHA2	45.8309	48.9514	20.8861	28.3224	78.6458	35.5458	55.1532
F3	94.5845	125.008	112.697	65.9607	198.785	138.377	150.576
FOS	2.70542	3.14459	0.407666	5.77314	10.4676	3.57527	22.2553
FOSL1	3.81151	6.16715	4.03418	2.26929	19.9601	11.7557	25.3369
HBEGF	12.3566	16.9069	14.7008	14.753	58.6515	21.2027	131.955
NR4A1	13.0589	51.0859	37.5008	73.4232	167.733	194.128	349.913
IER2	18.5805	21.141	9.22555	21.0458	61.4178	16.0096	103.189
JUN	30.8793	41.6537	94.05	47.7045	83.6281	244.939	148.292
MAFF	10.0323	14.7922	9.26317	11.6744	25.9453	11.8005	40.3112
PTGS2	18.2409	29.8711	45.0787	18.3485	95.8729	120.913	186.5
RGS16	2.43829	3.86648	1.18309	1.3044	7.65499	4.24241	8.45587
SLC2A1	42.5734	47.1162	43.9068	30.1697	69.4298	41.7767	49.7823
BHLHE40	13.4815	19.4021	6.48898	7.9018	41.5784	12.5312	25.7262
SDC4	24.6977	27.4874	38.2175	40.5571	40.9869	39.2838	92.1048
ZFP36	13.9908	15.0862	17.7219	12.6546	35.3566	36.6061	67.1935
GDF15	11.5033	9.19356	10.7095	2.65837	17.8512	37.4848	4.03132
SPRY2	12.0258	12.9132	2.67767	13.5177	20.7009	5.717	47.7235
SPRY4	4.30104	5.16192	0.221565	2.60492	9.03638	0.891066	6.15517
PLOD3	85.1094	86.2672	74.6563	87.6422	151.109	67.6442	82.4843
DUSP1	30.0065	38.7272	28.3413	35.7969	84.288	119.711	121.858
KLF10	8.52745	11.4395	8.17122	10.2144	30.8152	8.09078	27.9056
PLK3	6.26425	9.44174	2.09663	8.46829	20.1219	12.4996	26.2747
NR4A3	0.81575	1.49391	3.3982	3.58918	4.5728	10.3802	13.4862
MAP3K14	5.21947	6.09333	4.52007	4.05073	9.62368	4.27046	9.30848
EGR3	0.536038	2.56169	0.338172	5.41244	20.8603	0.390243	69.7247
DNAJB1	36.6083	41.1068	34.7234	41.4288	68.8043	35.6559	153.213
SERTAD1	28.5364	35.6033	23.7841	27.2929	55.7859	25.3071	52.4724
EGR4	0.0905054	0.531897	0.0273961	0.084205	3.84287	0	2.17536
DUSP10	4.39922	5.72923	11.1744	7.12203	9.78564	16.7917	28.4103
DUSP6	10.917	12.9126	0.891446	16.2046	35.8371	2.45703	74.1365
C8orf4	1.79362	2.39277	1.50654	4.3997	4.49877	2.66531	19.0161
FAM110C	4.55235	5.85123	3.97528	4.88859	9.89294	4.9742	16.1868
IER5L	8.74168	10.3449	8.66432	8.01132	22.261	6.56139	10.5971
IER3	25.4613	34.4132	65.3067	47.5261	63.7907	122.134	134.569
ERRFI1	7.05773	11.6562	5.35396	9.565	37.2721	9.61207	128.341
TRIB1	4.01913	5.33209	3.15791	3.48532	14.5579	6.39442	34.3033
KLHDC8A	31.7983	33.5722	11.1442	14.1262	49.3235	11.3368	19.6968
IRF2BPL	21.881	24.2567	20.7543	22.7934	37.2436	17.7173	32.7374
KCTD11	11.4318	12.4253	6.90748	7.26826	22.6152	7.78172	18.3563
CSRNP1	4.3982	6.01656	12.1938	3.68072	14.4164	25.1246	20.6039
DUSP4	6.03534	7.52236	2.60398	6.71149	16.6599	3.92759	32.8888
TNFSF18	4.60415	7.34858	1.88241	2.05179	11.7678	5.57124	7.05449

## Sheet: 4hrComparison
4 hr FGF up	4hrPDGF_FPKM	4hrPDGF_PD_FPKM	4hrPDGF_LY_FPKM	4hrFGF_FPKM	4hrFGF_PD_FPKM	4hrFGF_LY_FPKM			4 hr PDGF up	4hrPDGF_FPKM	4hrPDGF_PD_FPKM	4hrPDGF_LY_FPKM	4hrFGF_FPKM	4hrFGF_PD_FPKM	4hrFGF_LY_FPKM
EGR1	11.0784	0.746414	18.6999	76.1139	0.405989	221.538			MYOG	0.903075	2.05661	0.139806	0.295066	1.4424	0
DMP1	0.116009	0.0900493	0.252502	2.10836	0.0307441	7.59339			PALM3	5.03976	3.71098	0.825247	2.74897	2.6084	0.460909
ARC	0.685921	0.100784	0.91408	8.51548	0.134693	15.3985			HS3ST6	1.0401	0.788862	0.175948	0.410586	0.50313	0.341375
EGR3	0.495152	0.203432	0.909524	3.20292	0.0651272	11.1699			TLR7	0.727101	0.587741	0.127477	0.195584	0.32851	0.0884156
EGR2	0.506168	0	0.442441	3.80594	0.0823164	4.82301			TBXA2R	4.87665	3.29585	0.972442	2.10364	1.8091	0.552821
SPRR1A	1.4425	0.0995401	0.16725	5.29647	0.121403	0.596328			GPRIN3	1.32973	0.453677	0.271146	0.493131	0.441794	0.0865836
APLN	2.63759	0.27044	0.272037	9.75408	0.264934	0.883027			DCAF12L2	0.99831	0.514781	0.204936	0.312791	0.543049	0.117094
SPRY4	3.89046	0.173747	2.9854	12.7187	0.357166	11.6727			ADAMTS1	99.0952	108.718	20.9304	57.9668	117.992	10.6293
SPRR3	4.92684	0.619406	0.762235	8.68453	0.250133	1.43193			PIF1	1.66687	1.23869	0.361929	0.801912	0.833294	0.423309
IL1RN	0.216913	0	0.0268658	0.706903	0	0.083323			SHISA2	1.03137	0.465198	0.226652	0.502313	0.401451	0.127795
ETV5	12.4735	0.491711	13.5521	22.8286	0.735413	28.6697			G0S2	3.4736	3.40251	0.775381	1.72738	2.58351	0.198496
ETV1	0.725566	0.100394	1.14912	1.67238	0.0586255	2.41743			NSDHL	73.0428	65.4373	21.2949	44.0809	72.501	21.0657
SERPINB2	0.062155	0.144106	0.0335215	3.21985	0.123989	5.63212			ZCCHC5	60.6311	15.8378	17.7567	30.4889	16.4128	10.6668
MEGF10	0.610107	0.186835	0.470132	1.50183	0.060892	0.902474			ARHGEF19	13.2331	12.7687	3.93382	7.90786	9.46966	2.90286
DUSP6	10.935	0.996477	12.0622	51.8018	2.15956	109.436			WSCD2	7.76157	6.71427	2.55729	2.57601	3.44115	0.486069
PPARGC1B	0.329913	0.222722	0.101075	0.806161	0.0406179	0.181383			MOB3B	0.512495	0.78868	0.17676	0.24638	0.0523921	0.0590361
Lce1h	0.79003	0	0	2.40778	0.14214	0			DUSP27	3.26424	3.16761	1.1334	1.90151	3.61948	0.680427
SEMA7A	1.17057	0.663566	1.84534	13.63	0.808304	65.833			BBOX1	0.525597	0.369286	0.193284	0.157123	0.498249	0.198892
MYCN	0.194543	0	0.0899628	0.943349	0.0586949	0.327661			LMCD1	10.7513	6.05483	4.01498	4.51947	4.28458	2.02177
AREG	0.0947332	0.058198	0	2.1797	0.141961	3.45624			EBP	27.6856	22.1896	10.6558	15.4539	22.8931	9.97849
Mcpt8	0.167268	0	0.15438	1.71151	0.11206	0.200087			KLHDC7A	2.22111	2.17803	0.858457	1.27975	1.32449	0.177125
PRKG2	1.31734	0.925125	0.344339	4.29033	0.297537	1.67212			RCSD1	2.58647	2.9081	1.00753	1.20622	2.14261	0.358753
SSTR2	0.298322	0	0	1.1694	0.0946585	1.54835			KIF21B	2.40723	3.18496	0.966685	1.37176	1.43006	0.466256
FOS	2.4833	0.560238	2.60831	5.00742	0.413485	4.73266			BMP3	5.92542	13.5716	2.3895	2.25464	7.19912	1.06645
JADE2	1.19851	0.35481	1.08743	2.18529	0.186669	1.51711			ADAMTS15	0.822651	1.93166	0.337506	0.214322	2.6674	0.0491685
ETV4	5.70714	1.33368	3.89999	15.3271	1.36902	13.803			MAB21L3	2.60059	2.57556	1.07821	1.44779	1.41958	0.504406
Hmga2	81.0696	15.1271	50.5944	257.312	25.2317	221.864			STAC	0.735346	1.4148	0.305028	0.28408	0.672012	0.149337
Slfn2	0.377896	0.0395314	0	0.951928	0.0964279	0.0430437			GFRA2	15.0996	22.9765	6.28513	9.32864	16.0197	5.0746
MERTK	4.34065	2.61219	2.73454	9.39698	0.960689	5.29843			SOX9	19.0124	8.31301	7.92145	12.341	4.11635	7.55097
KLHDC8A	38.4682	2.09652	22.1583	107.581	11.0862	101.416			IL15	3.75345	4.94361	1.57787	1.06788	0.936416	0.264711
SPP1	25.6176	15.6209	21.0289	182.912	19.3393	120.236			RAB27A	1.91652	1.79927	0.812183	0.991477	1.33562	0.781089
EVA1A	4.00505	1.06796	1.08311	13.689	1.46112	11.1919			CRABP1	479.43	196.919	206.167	227.963	242.318	249.896
F2RL1	20.1725	2.27275	6.29331	66.6964	7.37196	40.3074			TMEM119	47.2989	36.7446	20.5273	30.4046	32.7398	16.7182
DAPK2	0.512184	0.230967	0.441333	1.21007	0.134873	0.863657			D430019H16Rik	0.593536	0.579876	0.258608	0.28453	0.357272	0.151265
Ccl2	20.8081	6.21054	3.50078	56.1676	6.29283	28.2329			SERPINB9	11.7654	10.4249	5.25571	7.64614	15.0694	3.43302
IL18RAP	0.507833	0.0612341	0.110986	2.33021	0.268842	0.881821			NME6	9.7788	7.46429	4.40824	5.26766	7.83454	3.77238
DUSP4	6.20231	0.339542	5.6936	25.4756	2.94756	47.8238			RASSF4	0.959789	1.05784	0.438714	0.49032	0.300096	0.214029
TMEM200A	4.99908	2.1233	3.67942	16.4092	1.9007	14.7928			NKD1	3.55432	7.04602	1.63715	1.72198	4.00686	1.12266
MYCT1	0.300589	0.0317737	0.0689972	0.69415	0.0850233	0.17051			SLITRK5	5.84073	6.52657	2.70515	3.72503	3.564	1.4003
SPRY1	16.0621	3.13184	13.7601	28.9263	3.59316	19.8232			ADAMTS5	89.258	92.9239	41.6269	56.8887	91.967	17.5036
C8orf4	1.55931	1.91329	3.03106	10.753	1.38184	27.1525			P2RY6	1.00378	0.751539	0.468705	0.428969	0.39894	0.329979
KCNK13	0.0705629	0.0486834	0.0337849	0.581562	0.0765163	0.186361			MAPKAPK3	17.0765	9.73437	8.07744	10.7229	10.2329	11.2898
TNFAIP3	3.38111	0.786866	1.85955	6.25911	0.876187	3.75492			Rpl29 (includes others)	133.976	58.495	64.0132	85.3151	57.9483	74.7696
UBASH3B	1.81194	0.264031	0.50437	4.13051	0.590772	1.66978			INSC	4.43602	4.92941	2.12553	2.31576	2.91408	0.94844
ERRFI1	6.63622	4.28719	5.4526	45.3614	6.51911	71.3201			STARD8	1.62441	1.40224	0.793177	0.715846	0.685279	0.677199
MEOX1	1.10429	0.431178	0.196228	3.42574	0.503414	0.720253			PALMD	2.85199	5.84816	1.39493	0.940909	0.78226	0.186255
PTPRE	1.78567	1.46213	1.21841	3.95846	0.586894	3.27436			Nacad	6.05981	7.81505	2.97859	3.75651	13.3166	1.78807
GJB3	1.72393	0.411099	0.312151	4.28107	0.635437	3.27398			ARTN	1.79942	11.1899	0.889268	0.756457	9.22965	0.350107
ZFP36L2	30.4137	6.96993	21.5427	105.44	15.9504	114.773			RNF144B	3.25679	2.46255	1.64882	1.66547	2.73567	0.584586
PHLDA1	13.4057	2.49528	6.60752	36.651	5.81093	40.7792			FRY	0.801279	1.07827	0.40661	0.381	0.472128	0.231529
RGS20	0.301861	0.039503	0.214069	0.934378	0.150308	0.64572			ARMCX4	9.35543	12.1266	4.82313	5.07666	11.1902	4.40799
GLYAT	1.2898	0.223111	0.249377	3.68319	0.597023	1.93742			LRRC75B	6.06707	9.96454	3.13043	2.78139	4.8656	1.55877
RGS16	2.09075	0.566243	1.4423	20.3734	3.35117	20.3016			FAM69C	3.27969	2.2471	1.71057	1.77594	1.86741	1.57819
ANGPTL4	0.418538	0.990027	1.73423	2.43948	0.407203	8.9316			MAP2K6	0.87857	1.20401	0.471797	0.2396	0.117888	0
IFI16	0.498219	0	0.0821113	1.56683	0.266549	0.369613			LARS2	389.653	153.395	211.319	208.909	190.824	218.548
DUSP5	3.21049	1.16416	2.42608	20.4999	3.52142	35.5444			ID2	17.8456	24.9518	9.75959	8.01157	18.1469	4.27987
Ccl7	7.54131	3.99391	3.70737	13.2189	2.30904	4.75373			P4HTM	1.99745	2.38838	1.10137	0.819408	1.46462	1.25231
FHDC1	2.95707	0.88251	1.60561	10.034	1.75357	7.0996			SMAD9	0.611155	0.81892	0.337882	0.212234	0.435094	0.145105
GCNT4	1.36364	0.335024	1.27881	5.23872	0.934211	8.0282			CACNB2	4.41672	3.39707	2.47473	2.40341	2.38614	1.01238
MTMR10	16.9246	6.85895	14.1644	58.2128	10.4913	35.0344			PDZRN4	0.499022	0.741098	0.281362	0.194115	0.118032	0.0294849
MGP	157.976	53.8073	148.261	294.859	53.8803	464.326			KCNE4	1.57234	2.80426	0.911586	0.572938	1.55767	0.4168
Pbp2	0.750915	0.165041	0	2.20171	0.410613	0.479213			PIK3C2B	1.90338	1.99001	1.11018	1.08043	1.38241	0.647519
FOXS1	1.30493	0.453975	1.40158	4.41919	0.825826	6.8617			WISP2	38.9189	68.9765	22.7775	21.8619	59.0145	14.6635
NAV3	0.242253	0.137975	0.166217	0.573457	0.110446	0.346688			ADCY1	1.37634	1.10141	0.808587	0.841556	0.759961	0.453543
BHLHE40	14.2939	3.40775	5.50644	35.4739	6.83884	36.8476			SLC27A3	35.1677	15.4331	20.814	18.9624	15.3204	10.4872
MYC	26.57	5.85282	11.8466	74.9139	14.5579	49.7908			COX7A2	100.31	55.2452	59.3836	63.3063	61.197	58.1763
SPRY2	11.3417	3.44953	12.8356	22.1435	4.35901	33.4593			PIDD1	14.5635	22.2684	8.71611	9.25311	10.6189	5.02184
NUAK2	5.05861	0.714179	3.81378	12.6869	2.58626	10.8528			NHSL1	9.84288	15.0473	5.89643	5.78142	10.3692	2.77427
ENPP1	0.532743	0.558472	0.901874	2.34736	0.485743	4.82512			Anp32a	27.8533	23.9474	16.7451	16.2742	19.4944	17.4257
GJB2	0.0570487	0.0261723	0	1.79501	0.374057	0.727312			EEF2K	14.8863	13.3799	8.9988	9.63544	12.6716	5.0336
NPTX1	0.181595	0.207724	0.0728935	1.02017	0.216714	1.52762			GLI2	4.86477	4.73028	2.95111	3.06275	2.4526	1.56752
CX3CL1	8.02138	3.27714	6.2264	19.5449	4.16367	30.2912			CYB561D2	6.76448	5.51947	4.15163	3.40996	5.62244	5.23793
FOSL1	4.60077	0.528388	0.691173	29.1136	6.26304	28.7452			CRYAB	181.899	160.443	112.085	122.068	221.742	106.424
TGFA	1.41865	0.563651	0.666818	2.93323	0.636461	4.11329			TET1	1.10951	1.4129	0.686466	0.656121	0.533058	0.383208
LINGO2	1.00486	0.491305	0.42732	1.96837	0.429893	0.605692			LIMS2	16.8425	15.9389	10.4414	10.0249	17.7561	5.73975
TM4SF1	39.6569	10.7374	20.9757	76.7083	17.3237	45.6687			DACT3	31.7181	20.7947	19.997	19.9936	16.6132	13.5338
NGFR	1.32085	0.66747	0.930056	3.14555	0.712051	5.44778			NDUFA1	100.371	51.0427	63.8983	53.4729	61.5894	66.978
VAV3	3.15476	1.51638	1.64242	5.17105	1.18196	5.11984			TCEAL5	2.75865	4.13928	1.77014	1.13228	2.36066	1.79077
HMGA1	33.4044	13.8994	12.4973	74.9298	17.3146	51.6285			RBP1	8.27982	6.6903	5.38441	4.83378	6.77765	5.44601
CCND1	141.353	49.793	66.8609	222.454	51.6278	104.917			SLC7A3	29.9768	27.2685	19.579	18.7353	27.3563	17.2366
EPS8	6.36763	2.20399	3.50254	17.4268	4.21901	20.5563			FZD2	52.411	44.4955	34.4887	31.5615	39.6236	21.8856
EREG	2.19983	1.81805	2.09366	11.1518	2.72446	20.2238			LINGO1	3.30679	1.68242	2.17719	1.5591	2.10351	2.68537
PPAP2B	12.8667	7.7597	22.3653	20.6467	5.13943	37.7502			MTUS2	1.62128	1.47923	1.06993	0.930633	0.744604	0.736987
CH25H	1.47912	0.487987	0.409444	3.07825	0.774	1.48197			KCTD8	1.66611	2.50463	1.11699	0.661843	1.19456	0.198539
TMEM173	7.54343	2.20082	3.1072	11.9941	3.05047	7.44817			HYAL2	29.7107	20.268	19.9715	17.1449	26.2506	26.6216
Nefm	0.109428	0.054019	0.109014	0.394259	0.101036	0.362403			MPI	18.3899	17.9134	12.4054	10.6278	15.9065	14.5316
SLC2A3	3.91388	1.64117	1.92133	7.4397	1.91192	7.28743			RSPO2	18.9101	97.0068	13.028	8.46849	69.4949	5.02521
RASA3	13.9016	5.27354	11.175	22.0953	5.70693	33.4114			COMMD4	38.9036	36.3615	26.8405	22.1451	35.6058	27.4435
GALNT3	0.616264	0.115621	0.179013	1.19157	0.311823	0.287971			Hmgb3	5.09758	3.99066	3.5217	2.54138	3.54462	1.90546
SH2D5	0.340028	0.74989	0.808867	0.883975	0.232178	1.26995			KLHL38	0.531299	1.09642	0.369967	0.146686	0.414196	0.0312365
SPRED1	15.1792	4.61648	18.9374	24.2297	6.43611	39.7527			OSR1	51.9255	107.757	36.1768	31.7721	76.9248	24.0688
DOK1	20.1558	9.30202	20.7319	36.7992	9.88382	39.0769			PMP22	88.7388	90.5833	61.9419	52.1425	64.4939	32.2659
HBEGF	15.7018	6.56259	13.5148	121.066	32.576	251.905			Rplp1 (includes others)	2194.09	1038.19	1531.6	1193.82	1273.71	1460.24
KCTD11	13.0878	9.58395	7.58047	34.3248	9.24617	34.886			PIK3R3	14.9938	23.6032	10.5149	9.48076	10.7872	4.99932
HIVEP3	0.295071	0.21994	0.49685	1.44532	0.39299	2.98859			FAM127C*	12.6056	10.8109	8.86743	6.35372	14.9327	9.12288
UPP1	0.563987	0.344964	0.483273	1.74971	0.477726	0.869168			FGFR2	11.7975	16.1587	8.30308	7.14721	8.79658	5.5002
IER2	18.275	7.59943	17.2731	49.1766	13.7075	71.6632			DZIP1L	17.6105	17.7839	12.5486	9.87324	18.113	8.39876
RBPJ	11.4602	5.97651	13.7623	26.6425	7.43606	24.3564			PRICKLE1	9.2537	10.6645	6.65887	5.17928	12.0173	4.69479
FAM84B	4.29632	1.71223	1.83973	7.22372	2.0556	2.84052			RGCC	14.3599	7.46851	10.3973	8.40393	12.24	3.07823
SYNJ2	10.4061	5.55528	6.04581	17.1092	4.87239	12.9387			PARP3	42.8775	48.4883	31.0912	21.0228	33.4914	23.311
Sprr2k	1.68748	0.653563	0.73116	4.23366	1.21103	1.9848			OLFML1	3.22619	7.8402	2.39274	1.42089	2.40882	1.21038
ANKH	7.87068	4.99247	10.1794	25.9955	7.45186	42.0388			RGMA	5.30192	7.57655	3.9403	2.34715	3.6977	2.07505
TMCC3	9.71165	4.22747	7.07836	29.513	8.49316	34.0262			P2RX6	2.5307	6.01544	1.88208	1.31768	1.79003	1.4499
TFPI2	0.509386	0.391765	0.0455935	1.56604	0.451625	1.18297			PLXNB1	8.7915	12.0587	6.59015	3.7581	6.64948	5.01508
VCAM1	26.6092	14.4894	13.5169	54.3849	15.9093	25.0187			TIMM17B	21.8151	15.8047	16.4243	11.4425	17.4723	16.4556
SEMA6D	0.456925	1.14187	0.844706	1.29001	0.378077	2.69939			C15orf39	11.9044	6.96817	8.96796	7.45652	7.60014	9.57186
DOCK4	4.53373	2.57355	5.33573	6.95706	2.06679	6.89276			ARHGEF6	6.00016	7.17467	4.54109	3.20689	5.02026	3.19024
TMEM171	0.253624	0.06092	0	1	0.297201	0.331927			TSPAN7	31.7656	23.3444	24.0989	18.9029	26.2726	26.0431
GCNT2	1.28681	1.08145	0.968528	4.75529	1.46791	6.25267			EMD	86.6911	68.2025	65.9891	51.2639	97.1971	54.4817
TUBA8	0.164051	0.113982	0.048439	0.743045	0.229597	1.2566			ADRA2A	4.10638	5.06252	3.12584	2.29873	4.85429	1.40162
P2RY2	0.975817	0.389927	0.265316	2.33765	0.722528	2.3759			MPPED2	6.163	4.31038	4.71236	3.59128	2.79105	2.42729
S100a7a	0.895732	1.05402	2.10468	2.233	0.695253	2.1338			NDUFAF3	9.98527	8.97643	7.69468	4.57296	7.65822	5.9306
IL34	0.740618	0.330654	0.235041	2.16661	0.683232	3.36			LMTK3	7.28127	13.3291	5.61101	4.64476	4.54801	3.31544
TNFSF18	5.2675	0.490889	1.38486	20.3097	6.4644	7.10613			Nmnat3	2.69826	2.45488	2.0892	1.39167	1.69549	2.23054
MAFF	11.8052	2.32095	9.29762	25.1526	8.02362	30.2024			TCEAL6	6.75575	9.19501	5.25458	3.53789	5.61124	5.47628
MAP3K6	1.8062	0.728784	0.621948	3.25263	1.03856	2.5468			FAM53B	5.56652	5.97267	4.34874	3.46372	2.88048	2.9594
POLR3G	2.2933	1.45349	0.779165	3.84055	1.23884	1.54695			HES6	31.9878	29.6107	25.1242	20.3331	22.2572	11.4222
SIPA1L3	8.11641	4.9471	5.4364	12.408	4.02716	10.6227			ATOH8	1.54208	1.02318	1.21121	0.345136	0.276847	0.204281
MAST4	7.39252	4.64093	5.69643	14.2226	4.63763	16.2438			UQCRC1	102.274	80.7821	81.0383	57.182	99.4804	86.4735
FAM110C	4.80184	3.38764	6.50859	15.1544	5.06705	25.0948			RSPO3	10.0662	4.97587	7.9781	4.42693	1.92204	2.00351
SGK1	14.7063	13.6052	17.5474	47.228	15.8653	98.6117			PEG3	43.0003	44.3603	34.1239	26.3829	23.6746	18.0758
ITGA4	3.60652	2.84481	2.46525	7.15792	2.43177	5.05828			LPAR4	12.7603	6.58116	10.1663	7.17134	4.9745	4.1519
PKP1	0.229768	0.294533	0.117787	0.959586	0.332445	1.46926			COX7B	74.3976	50.3215	59.4597	46.7254	56.4779	55.512
PLK3	6.3843	1.36233	5.41785	13.9963	4.86743	17.301			INSL6	5.72709	8.65048	4.59084	2.65628	3.11078	3.36206
ADORA2B	2.20977	0.897825	1.10499	5.93444	2.10488	5.07665			GNAI2	299.562	239.721	240.281	161.009	282.688	261.1
SOCS5	15.1095	8.27105	13.5797	31.0507	11.1532	42.3102			PRPS2	19.8347	15.0684	15.9727	11.0855	10.1159	11.3998
KCNF1	1.44314	1.33401	0.450741	3.2138	1.16176	1.80214			ELK1	16.0078	15.3822	12.9267	9.23921	17.6553	12.5305
SLC14A1	0.58174	0.23133	0.241745	1.97395	0.715401	3.42226			RAB3IL1	4.65442	5.88098	3.78598	1.7815	2.89934	1.82422
LBH	80.7808	32.2157	87.4292	162.484	60.251	204.339			LOXL1	124.392	94.2802	101.79	78.3529	147.128	157.749
FLT4	2.24644	0.671055	0.927523	3.82333	1.42402	3.68592			DACT1	15.6003	31.2163	12.7791	7.21817	26.7044	3.99467
RCL1	14.502	6.45319	7.14188	23.7689	8.88808	16.8021			CELF5	5.18177	8.17885	4.26355	2.38464	3.49519	1.5549
STC1	1.00831	1.61121	0.790375	4.3373	1.65246	3.92882			CSDC2	7.68026	9.9421	6.31934	4.59494	3.75885	3.7728
ITGB3	8.47691	4.55735	8.80047	13.0752	5.00209	33.2708			KLF15	2.01934	1.49886	1.66345	0.853777	1.07265	0.555388
PUS7	12.7201	10.0281	8.03256	19.0876	7.32873	12.3479			FAM50A	34.8601	36.4388	28.7416	19.0587	40.2755	26.6345
CCRN4L	8.15001	4.98635	5.33417	21.7424	8.35248	30.5967			EIF2S3	6.62453	4.64454	5.46713	3.90933	6.85076	7.27608
ADAMTS8	0.248302	0.198605	0.120813	0.651095	0.252764	0.228339			DHRS3	8.16548	26.3973	6.79431	1.71379	12.7134	1.59481
GREM2	5.0629	3.41458	1.70294	8.54061	3.3708	3.53783			FAM127C*	14.0768	12.012	11.7377	7.5751	14.3109	12.7934
C12orf45	11.4089	7.08161	10.5215	19.4191	7.67465	18.8966			GPR156	0.585717	1.42214	0.489075	0.268945	0.534299	0.335927
DIMT1	1.98686	1.94718	1.99199	3.42336	1.37213	2.96046			ID3	48.9429	44.763	41.1626	19.8909	23.4802	12.4245
JUNB	14.1298	10.7239	14.8648	35.4663	14.4235	57.0327			KLHL18	8.65063	8.98079	7.42095	4.98237	14.2029	7.97242
ANKRD1	24.4724	9.45589	6.42804	55.0661	22.3973	10.9524			MAGEH1	29.3976	29.8313	25.3024	17.7711	30.2505	23.6837
KCNN4	1.14896	0.251537	0.335948	3.50236	1.44364	1.88692			BCL9L	34.7471	31.4761	29.9229	21.4636	31.9393	17.2542
ELK3	29.2308	13.4165	18.1239	45.7613	18.9254	41.449			KDM5C	27.2212	26.8799	23.455	15.4638	27.9267	22.7475
FGD6	1.23413	0.775321	1.00456	2.07811	0.878711	2.14493			GPX1	185.926	97.8623	160.563	109.109	110.115	153.892
EMP1	215.212	79.0828	169.232	410.192	174.394	592.444			NUDT11	1.56953	1.46922	1.35629	0.742679	1.02832	0.570358
S1PR1	12.7703	5.44217	7.82785	35.3864	15.0482	29.3423			FAM127A	14.9791	14.9153	12.9732	7.93161	14.983	13.4149
LIF	8.48867	4.93529	4.90582	14.2822	6.08671	19.906			TSPYL2	21.1863	42.6209	18.358	10.5999	27.8193	13.353
PTPN13	6.19405	4.63614	10.1599	10.5991	4.521	17.9262			SKIDA1	2.172	4.05622	1.88565	1.13823	1.80251	0.541847
SLC4A7	15.3711	10.6781	15.8313	26.1889	11.1948	28.159			HSD17B10	68.7563	55.2997	59.7841	40.7341	57.8945	60.898
Nes	13.8822	5.62114	7.42273	37.6117	16.1555	52.7033			RBM15B	23.2771	18.1787	20.2903	13.8969	23.9922	20.5712
Nolc1	21.0475	11.7844	9.1689	33.9268	14.5896	18.8798			MRAS	22.9962	22.6218	20.1262	11.4842	27.0059	17.9683
DHRS9	0.241681	0.132116	0.0739951	0.625916	0.271771	0.0720223			MON1A	5.27602	4.51283	4.63323	2.56772	5.33922	2.70619
DOCK5	6.06	3.46183	4.64673	11.2495	4.89994	18.0866			Tmem115	30.9628	21.1218	27.2293	19.6392	27.3958	31.2102
KLF10	8.66534	6.60369	4.52718	22.2362	9.71704	33.088			RAB9A	33.1605	37.1974	29.168	18.4958	24.1614	18.4204
TNFAIP2	8.79007	9.36451	13.951	17.9094	7.92914	55.9726			ZC2HC1C	1.03318	2.76303	0.908799	0.496419	1.07359	0.395083
CD34	23.9129	15.4147	15.8675	41.8265	18.5343	24.534			POU3F4	7.12589	7.8912	6.27721	3.20477	8.50431	2.93689
TGIF1	37.9336	24.7683	42.7554	75.0392	33.2595	97.5887			CXorf40A/CXorf40B	29.9185	21.4025	26.4544	15.4753	16.49	20.6712
OSBPL3	9.67701	4.13499	7.05573	15.7118	7.05736	15.1909			PPP1R3C	0.547045	0.756268	0.487012	0.131577	0.173762	0.266315
POLR1B	7.0572	4.02622	2.80506	11.2322	5.07223	7.28545			MRGPRE	2.38094	2.93261	2.12696	1.15336	1.92081	0.563508
ANKRD28	10.9256	9.73954	13.1328	23.1572	10.4673	34.533			C10orf54	1.92134	2.57551	1.72785	0.912025	1.63283	0.856611
ELFN1	1.94808	1.17436	0.694038	4.64305	2.14562	6.06308			SEMA3F	30.2964	28.9269	27.2617	15.9617	25.0616	32.3183
VGF	0.392984	0.094193	0.357198	1.13577	0.52597	2.21578			NCKIPSD	6.63054	7.85894	5.97402	3.78332	6.8978	6.25474
F2R	148.641	103.643	215.297	288.29	134.678	500.626			CDC42EP2	11.0422	16.0118	9.96949	6.20831	33.8761	7.48328
RASSF5	6.46669	3.81155	7.21826	10.7058	5.01615	10.8117			RIMS2	0.39301	1.09593	0.35741	0.173547	0.530137	0.427386
RAP1GAP2	1.31395	0.36914	1.38878	3.03015	1.42038	4.63149			ANKRD44	7.92638	10.6963	7.21777	4.48191	6.66326	3.06072
MDN1	2.62541	1.83629	1.86124	5.21942	2.45451	5.13901			APEH	29.0804	29.6502	26.5757	16.7186	26.7752	29.0024
RND1	4.55978	1.45935	3.9864	9.2676	4.36341	6.4837			PLCD1	22.8226	25.2242	20.8727	14.208	30.1164	27.9691
9930111J21Rik1/Gm12185	0.603273	0.138774	0.2143	1.46974	0.692515	0.496211			FIGN	0.388923	1.06879	0.356882	0.164372	0.345298	0.16024
IFFO2	15.1651	8.32488	13.402	29.209	13.9887	44.4019			L1CAM	1.00843	1.16063	0.927193	0.420657	1.55995	0.812281
PDK4	4.29539	4.28568	8.7257	7.17927	3.44232	18.2024			KCND1	2.08895	2.43752	1.93444	1.0026	1.64679	2.36618
RNF39	0.761834	1.25409	0.647929	2.20099	1.05542	2.96482			ADAMTS7	9.22711	9.91556	8.55921	4.01474	6.59142	7.12476
GRAMD4	5.74846	6.11603	7.74817	13.8176	6.62714	25.7508			IDH3G	54.0302	49.8645	50.2228	28.5225	48.0719	50.463
EPHA2	48.4785	11.5282	29.4014	87.4451	41.9482	83.0257			SLC7A2	1.31435	1.14204	1.22261	0.75014	0.558409	0.776353
BCL10	37.0412	24.7123	37.6636	64.5304	31.0357	65.3773			SMAD6	7.12078	7.47287	6.63719	2.65939	4.85949	3.47706
Dynap	0.936643	0.193643	0.444546	2.91175	1.40515	2.3132			ZNF579	13.6227	18.9093	12.7527	6.09916	8.93668	4.47809
ITGA3	21.7845	16.5122	13.9892	38.7705	18.7885	36.3487			UBQLN2	27.8214	27.701	26.0772	17.2837	27.4168	27.0233
SPHK1	7.14583	2.17797	4.78956	18.0863	8.79505	30.3521			AUTS2	3.07363	4.50757	2.88399	1.71445	1.82327	1.79484
RRS1	25.4847	11.9018	9.84212	42.3861	20.7159	24.2768			ANAPC13	105.108	81.0187	98.8699	54.7068	84.6887	90.0523
PHC2	43.1228	26.05	42.2251	71.2883	34.9412	83.7272			KLHL13	75.093	95.2231	70.7479	40.0508	85.1498	53.6747
ARNTL	12.5998	6.58308	14.8005	23.6448	11.6162	29.5315			CHST15	16.647	6.60617	15.7125	11.0136	7.65529	7.89167
RASA1	16.5108	14.6959	22.1068	29.4797	14.4941	38.6428			MAGED1	264.623	312.713	249.888	161.402	297.398	246.486
GFPT2	3.84723	3.09347	1.88096	6.80534	3.34673	7.14207			PLEKHA7	3.40609	5.59757	3.25278	1.55904	1.75119	0.845819
FKBP5	3.83743	1.60882	3.67913	6.63364	3.27035	11.0517			Lage3	40.3815	37.5949	38.8065	22.1477	38.9407	28.5453
RAI14	47.1194	40.7807	44.8686	71.5638	35.468	71.5565			ABCD1	8.092	7.57536	7.79196	3.65029	6.90569	5.69225
DYRK3	2.85572	1.49574	2.17975	5.31	2.63801	4.31937			DIXDC1	3.24431	4.91367	3.12425	1.73368	3.00754	1.88976
Zfp52	4.4712	3.7265	3.59695	8.21052	4.09063	7.24807			PYGO1	6.31063	7.80982	6.08024	3.1398	6.64587	4.20198
CYTH3	31.1766	16.5027	36.1634	55.8468	27.9036	97.3871			PCCB	18.1558	18.2678	17.5386	9.8462	16.3732	14.8376
FLRT2	34.4482	24.3677	32.0975	52.4498	26.3925	44.2015			FBXL7	12.3316	14.8191	11.9494	8.14961	7.94467	5.02869
PIM3	11.2758	10.0132	11.7233	19.2001	9.68745	14.6269			MEF2C	5.03969	5.42842	4.89345	1.90054	5.32637	1.13057
NOC3L	8.74713	7.12091	7.64213	15.4341	7.80865	14.5711			HYKK	2.72334	2.62361	2.64624	1.42083	1.56743	1.53902
TEAD4	3.97557	2.98949	1.5258	7.73571	3.93648	6.79775			ID1	17.2346	8.99025	12.4478	11.1915	6.09479	9.8575
SLC25A30	8.11598	6.15485	19.8927	13.2859	6.80476	31.1225			FOXL2	2.67776	2.54658	2.62648	1.17638	1.65984	2.03109
NREP	61.4389	57.8592	72.2878	103.57	53.5367	93.1818			DRP2	0.639743	1.20962	0.629018	0.31328	0.3114	0.562667
TTC9	3.66881	3.71426	3.56106	10.3706	5.39763	21.6792			MMP11	27.3669	49.4264	26.9476	17.6914	35.7977	16.7109
ARSJ	1.00456	1.11302	0.197415	1.96956	1.02549	1.05119			TRAK1	11.0159	9.73961	10.9513	6.63433	11.0919	9.62581
GRWD1	16.7988	7.51202	6.14523	28.1362	14.6744	18.8512			TOX	14.2132	10.8244	14.1393	8.83968	5.47098	7.04212
RSL1D1	62.3684	46.2626	44.5183	94.7604	49.8816	66.3964			PPCDC	4.35043	5.46275	4.33789	2.37405	2.05751	2.37162
TRIB1	4.23677	2.00889	2.70866	11.2487	6.03463	13.6201			FAM3A	20.2197	19.9536	20.2497	11.4939	21.0536	19.1874
IL1R1	4.21529	5.16915	6.40874	6.85945	3.68487	12.1204			PTX3	278.479	226.739	279.863	155.091	202.271	129.014
F3	104.574	61.034	60.7279	232.888	125.933	110.072			PTPN23	30.4214	37.0967	30.6296	18.794	39.5077	34.5627
NIFK	22.8975	13.2436	14.1469	39.9677	21.6674	31.3027			HMGCLL1	5.65969	5.44315	5.71624	3.00317	4.6569	3.02039
CAV2	45.8199	33.0646	34.0638	78.9498	42.8606	49.4834			ABHD14B	11.6786	13.6922	11.7975	5.01878	6.05799	8.44316
IL4R	2.98924	2.13225	3.6499	5.25719	2.8713	10.4381			EPHB3	28.2878	28.024	28.6069	17.1686	24.9824	19.3794
Ivl	0.11779	0	0.0563213	0.828568	0.452872	1.26013			CBX8	8.92885	9.92699	9.03662	5.04152	5.83173	4.68904
CMTR2	3.4301	2.22678	1.62625	6.00345	3.29884	4.01076			WNT16	32.605	91.5674	33.0349	17.1147	105.393	17.2692
MTAP	51.7552	41.0131	39.2082	80.5	44.2402	63.1511			MAOA	31.5023	50.792	31.9366	19.4441	57.7848	26.8286
GEMIN5	7.24431	4.77832	5.7699	11.274	6.20042	9.79475			ZNF467	5.86018	8.1507	5.95194	2.84927	3.22734	2.11783
KRT18	3.23805	1.78606	0.95326	8.58799	4.73207	3.68619			TWF2	11.221	9.43427	11.4272	5.66909	5.86159	10.9756
CHCHD4	10.3989	6.6974	7.14017	19.2376	10.746	12.2977			KLHL29	5.1603	5.30608	5.26812	3.00918	3.51953	3.40849
TAF4B	1.55141	0.994806	1.15284	2.5748	1.4395	2.27776			ACVR2B	0.713549	0.692063	0.731107	0.263905	0.398627	0.650824
NOL9	17.2055	11.017	11.3644	25.9485	14.6275	21.6985			SLC25A38	19.4912	19.6534	20.0138	11.6982	19.278	19.4408
DDX21	35.696	22.8389	22.9503	61.0547	34.4671	48.3511			ACAA1	42.7261	50.6769	44.1981	23.0596	41.1162	40.7528
MEDAG	27.3078	17.4997	22.8719	41.467	23.5517	48.4283			IGDCC4	29.1868	40.0261	30.4814	15.3099	29.2979	25.0401
CFLAR	11.9938	8.47445	21.2134	18.9596	10.7862	28.5315			C11orf87	1.20583	2.87194	1.25949	0.438122	3.68339	0.774505
HEATR1	8.47962	6.66381	5.43729	14.194	8.07957	12.8243			CAPN6	51.1055	54.8937	53.3977	32.1478	56.3131	52.2744
HTR2A	0.896704	0.681832	0.147587	3.09809	1.77666	0.679809			Gsta4	14.4911	22.538	15.2153	7.93717	23.4177	12.0073
RPF2	9.56072	6.38987	5.51478	16.581	9.51569	10.1611			Zfp651	15.5412	18.1335	16.3942	7.5379	19.9861	11.897
TP53BP2	10.9825	12.2623	14.3095	18.046	10.3589	27.0385			CNNM2	9.44426	12.2821	9.99344	5.7131	14.2776	5.22134
STK40	20.7912	16.3024	17.0369	37.3951	21.5423	38.5973			ARMCX6	6.44393	8.98376	6.86364	2.32129	4.4289	3.92894
PFKFB3	6.87316	6.52142	4.15827	10.3045	5.94351	7.23843			NFIX	57.3538	70.6191	61.0925	38.293	64.4057	39.9119
SLC29A2	1.76261	1.31188	1.07651	3.28918	1.89989	2.05904			GADD45B	83.8266	119.832	90.4512	55.3051	180.083	40.3994
MTCL1	1.9463	1.47269	3.39643	3.22752	1.86885	8.67671			WNT9A	38.7285	55.6576	41.7981	23.9766	80.6683	23.8653
TIAM2	8.08761	3.60603	7.20622	12.463	7.23993	11.4745			ATP6AP1	184.367	151.388	199.735	114.606	182.172	197.077
ARL4C	11.9099	6.8854	9.74529	24.9553	14.5046	25.9133			PGRMC1	197.777	226.156	214.858	117.203	266.74	195.918
Pwp2	9.93229	6.229	5.11422	16.3706	9.52812	12.1333			SNAPC5	16.9875	20.1027	18.5157	8.92854	16.1775	16.9589
NOP2	29.1425	18.3281	18.1097	47.3563	27.6432	36.5277			CFP	1.99326	4.9563	2.17909	0.832611	1.65628	1.81106
SIPA1L2	2.80292	1.76603	4.34962	4.94236	2.92709	19.1095			Otud5	26.1955	30.4121	28.6494	16.3892	27.3412	32.5002
LRRC8C	22.781	14.2673	19.0673	40.5113	24.0621	49.0766			ZNF503	14.5398	16.7078	15.9858	9.5263	12.7098	10.9776
OAF	30.1234	21.0906	19.4013	46.193	27.482	56.569			ENTPD3	0.803814	0.568366	0.887101	0.353968	0.43694	0.713502
NOL10	14.8557	11.2225	8.87731	24.6843	14.7123	18.2614			TSPAN3	189.412	155.054	209.298	120.741	170.004	206.347
TEC	2.86802	2.66744	2.76267	5.0772	3.02745	9.9966			KDM6A	8.02396	9.7756	8.89312	4.82806	7.10694	7.80121
FOSB	0.292649	0.304973	0.408936	0.834044	0.501538	1.43757			MAGEE1	15.2199	16.1055	17.0335	9.33482	16.4385	16.3786
Ankrd50	12.4346	10.9376	17.0758	20.4259	12.3149	29.928			PRAF2	49.3649	54.5404	55.2479	28.6338	61.0929	51.0947
ZNF697	2.82261	1.25521	2.87337	4.80078	2.91264	7.37388			TMEM35	6.65801	9.18227	7.49429	3.6245	5.54114	8.57471
MPHOSPH10	14.4466	12.602	10.519	24.7475	15.1597	16.211			MEGF9	12.9302	18.9316	14.6641	8.13127	14.0633	9.48342
PLAT	19.3641	24.0652	30.8915	33.0971	20.2859	105.889			GAS1	18.6439	40.7359	21.1955	9.43566	16.5816	14.7212
CTGF	823.164	142.774	616.282	1486.41	914.306	1052.61			Ptprv	2.95712	6.65907	3.36686	1.7422	3.25956	2.91863
SNX9	59.4695	47.5585	44.489	90.1205	55.611	98.424			NYNRIN	18.5699	24.3531	21.2632	12.2368	17.0691	12.7653
LITAF	38.651	20.396	27.2994	62.6815	38.7325	44.7451			CAPN5	3.26431	3.17382	3.74656	1.84513	2.20285	3.27391
PTGS2	21.0186	14.6571	14.9264	148.624	92.2737	184.282			TBL1X	45.9703	45.8439	52.7753	29.2362	37.4611	43.0566
TNFSF11	2.69737	1.98575	3.5176	8.28672	5.16589	9.28592			POMGNT2	8.59346	7.76785	9.93889	4.7573	6.8488	9.57864
HK2	6.50681	3.79333	1.99743	11.5552	7.24776	6.67846			IFFO1	12.0345	17.7352	13.9225	6.95231	8.02004	9.03708
FGD3	14.8639	9.06397	5.99634	23.6899	14.9022	11.5373			BCORL1	4.00722	4.35874	4.6401	2.07404	4.19662	4.97552
Klf16	9.06013	5.71332	8.74764	15.0947	9.51027	13.7676			ALX1	8.27722	8.28315	9.58567	5.0138	6.95112	4.89147
SMIM3	16.0207	9.641	9.51668	36.9034	23.3614	40.2348			FOXC1	12.2567	8.95581	14.213	7.10944	6.86644	8.51685
TWISTNB	8.23192	7.32228	7.81854	13.8032	8.74429	12.0604			CACNB3	29.2072	37.7821	34.353	19.3505	30.1315	24.2376
PLA2G4A	23.2268	16.9565	20.2429	44.55	28.4125	45.2218			Acaa1b	1.28315	3.31302	1.50928	0.453319	1.17989	1.56663
IQGAP2	4.48571	4.40324	8.04095	7.24386	4.63192	20.1229			APH1B	7.05796	7.17202	8.32033	3.93907	6.29618	5.71432
CNNM4	4.91208	3.27751	5.85569	7.61134	4.87865	9.42832			GPR173	1.65634	2.37088	1.97111	0.771978	1.49113	1.41557
LYAR	16.9408	12.7931	14.2821	27.8431	17.8603	22.8905			TRAFD1	36.4753	38.3659	43.4363	23.546	28.7848	28.9512
CYR61	367.294	159.765	403.921	590.928	379.993	555.374			MZF1	0.474973	0.554311	0.56763	0.165175	0.111562	0.428049
CTTNBP2NL	20.0932	15.5171	27.6524	44.5348	28.6784	68.2964			NICN1	13.8724	16.3235	16.5966	7.50445	11.4044	13.5382
SEMA4B	3.63389	3.19132	3.16379	5.85571	3.78018	7.35439			SIX5	8.22292	14.7027	9.84749	4.56003	6.08507	4.79264
IL17RA	5.50372	4.80111	7.11822	8.79279	5.68306	10.9318			CLK3	22.7892	30.4931	27.3328	13.6329	28.4837	23.2952
SH3RF1	4.36245	2.73188	5.33342	7.30055	4.75053	10.5049			AFF3	5.23091	14.1741	6.34234	3.10654	7.47477	3.45864
SGMS2	7.06615	4.73559	8.25875	15.7788	10.3106	25.8671			METTL7A	5.05364	6.59942	6.25055	2.83473	2.81614	2.65652
PWWP2B	8.97015	6.04123	6.5111	16.4252	10.7539	15.0596			EFNA4	17.0361	18.6422	21.0721	10.5429	16.4143	13.9178
WDR43	23.9556	18.5678	15.4554	40.8762	26.8048	29.9513			PIK3R4	10.1692	9.11231	12.6027	5.96349	6.86005	10.8179
NAF1	5.41093	5.89192	3.9325	9.45994	6.20697	8.00891			GDI1	63.6311	109.616	78.934	35.2943	88.4756	65.5925
CDK18	6.39065	4.83683	4.62546	12.3023	8.09909	13.5613			ATP13A2	13.8592	15.2748	17.3612	8.95198	9.48909	11.1479
ALDH1A3	0.924003	0.549255	0.494233	3.30552	2.17988	2.24466			ASAP3	5.46152	7.45863	6.91632	2.62246	4.15336	3.49575
SDC4	25.5387	27.0082	37.8191	74.1766	49.0579	183.75			HEXA	91.2324	85.926	115.756	55.663	101.854	111.241
NXPH3	0.10964	0.117255	0.165304	0.53742	0.357113	4.67073			CLMN	1.18017	1.64468	1.49885	0.668207	1.59533	0.782108
QTRTD1	5.92492	6.151	4.43663	10.4886	6.97093	8.29346			MXD4	71.6949	88.0104	92.1133	45.4638	81.4352	65.3436
OTUD4	12.8968	13.8678	13.7677	21.9383	14.6297	21.1497			DENND4A	7.8328	12.8911	10.1139	4.17805	7.72976	5.47485
URB1	2.36336	2.85191	2.05861	4.26974	2.85423	3.91646			ATG16L2	7.77438	24.3392	10.0664	4.48955	10.7749	4.5625
LRRC8D	17.3914	14.0426	12.2067	27.2357	18.3408	20.6872			IP6K2	20.9007	36.077	27.5566	10.5053	21.6429	20.7716
FBXO28	12.4386	10.7574	13.9432	19.0067	12.8049	23.703			RASL11B	34.2859	53.4433	45.3007	12.0723	52.1043	12.1785
CTDP1	11.2381	7.59433	9.69106	18.1467	12.2738	19.8008			NOTCH3	19.107	17.8883	25.325	12.2249	13.9271	20.4192
PPM1J	0.977715	1.39878	1.16318	1.92752	1.30698	6.86349			HMG20A	12.8042	13.7705	17.1078	7.58993	9.57217	13.0365
FHL2	73.048	49.8613	48.6006	108.872	74.1441	72.8184			MTHFS	2.78996	1.90176	3.76286	1.07446	1.6205	2.42395
URB2	6.58012	5.23451	5.18579	10.8504	7.44526	9.79558			MED12	8.49192	15.3531	11.5413	5.27839	9.35334	9.76537
CRCT1	0.489928	0.113993	0	1.68707	1.16218	0.372364			FOXO4	9.91141	11.4754	13.4926	5.77136	10.7224	12.3721
NAA25	16.6435	13.3149	11.8521	25.0753	17.2811	20.3046			NPRL2	8.65604	11.0851	11.8182	4.42463	9.18389	7.17891
TRMT10C	9.8188	9.59128	7.96648	16.3111	11.3091	11.7094			PRRT2	1.80935	6.40222	2.47656	0.942691	1.1068	0.905211
BDNF	21.1718	13.7929	18.9205	31.2769	21.7313	27.0072			BMF	1.73808	5.3433	2.38507	0.569918	0.956582	1.08077
ANO1	10.4684	6.55013	4.10526	19.3383	13.4748	8.92098			SNX33	11.0274	11.8478	15.1593	6.83978	17.0598	12.8632
NOP58	47.6065	34.9989	26.2917	76.9252	54.2591	51.8561			SUV420H2	10.6847	20.2264	14.8576	5.87765	7.81531	7.47495
FOXG1	5.52196	4.59208	7.11854	9.78475	6.91801	13.2838			GAB1	13.1635	15.8398	18.3251	8.75603	12.4656	9.48336
SLC16A1	8.77775	6.46399	4.48638	14.61	10.3555	10.5635			KAZALD1	2.09212	1.99032	2.94085	1.04017	1.63792	1.8744
BCAR3	3.08619	3.35302	1.49137	5.96835	4.24805	4.61323			PLXNA3	8.42718	10.1473	11.8707	4.68134	8.0285	8.31475
ADAM19	33.4686	24.8014	22.7281	48.9742	34.9895	50.7724			ZNF395	5.04136	5.24217	7.1126	3.05955	1.53334	5.00762
TSR1	24.8957	20.7297	14.55	39.7822	28.4841	30.7572			APBB1	14.9079	17.6299	21.1769	8.6338	16.2074	14.6381
BDKRB2	0.942443	1.21028	0.307157	3.0881	2.21815	4.51604			DDX26B	3.95927	11.0057	5.64467	1.96529	3.43129	3.0312
SOWAHC	3.18295	3.24299	4.52624	5.45989	3.93417	7.78796			HDAC5	21.6862	29.7797	31.1365	13.7451	33.5078	31.7376
PARD6B	2.50501	3.93011	1.55614	6.03469	4.37845	4.70511			POU3F3	11.9427	21.53	17.2386	6.9883	11.7824	9.58808
SHISA6	0.292197	0.312878	0.36214	0.58725	0.430873	0.648311			Nrbp2	21.2177	47.3465	30.6861	13.47	26.7916	17.2663
CD44	80.6792	32.9138	68.0424	201.647	148.461	236.867			FAS	33.6929	48.3236	48.9154	20.0544	33.8524	17.4548
EAF1	16.2699	13.4289	15.8346	26.1305	19.3744	26.1506			AMOTL2	146.985	168.229	213.504	79.9592	193.376	163.424
CIRH1A	21.6186	17.4817	17.4474	34.3084	25.6348	27.5578			SLC22A17	11.6568	23.9727	17.1322	6.63511	9.38356	8.15044
NFE2L2	36.8229	42.4038	43.7192	61.2304	45.8605	97.2058			RBM5	41.647	69.013	61.7412	23.9682	43.1251	42.3517
ATP8B1	0.434702	0.372683	0.235895	1.13379	0.850036	0.717047			PHIP	6.37615	11.4448	9.6304	3.95727	6.82571	8.63517
KIF2A	15.6477	15.4662	22.7767	25.2708	19.1698	36.8895			FIGF	11.2683	25.8447	17.2572	5.46347	14.5598	12.9234
KITLG	2.01045	2.31565	2.83456	3.49025	2.64833	6.0893			LAMB2	61.1417	83.5449	94.851	32.9678	81.9029	84.671
GTPBP4	28.5614	25.2441	23.6932	45.9369	34.8614	42.0121			PIAS1	10.9135	16.8208	16.9541	6.07244	12.883	11.4657
NMT2	10.5885	11.7562	12.8582	16.8144	12.8973	22.2116			TCTA	26.2298	33.1007	40.9779	12.8284	29.2089	22.8858
PTPN12	20.8735	17.5116	23.5241	33.6301	25.8311	40.5049			USP11	11.932	15.0254	18.709	6.28506	9.1281	14.3624
NIPAL1	0.382512	0.319757	0.815607	3.14088	2.41388	8.30981			RIN2	8.10932	14.0091	12.7153	4.63626	16.7645	7.54833
KATNBL1	8.53665	9.47357	9.83162	13.8754	10.6721	11.9556			FAT4	8.14069	16.8661	13.179	5.49905	12.7802	8.2574
Nppb	4.31507	3.14029	3.85769	32.829	25.2727	46.3826			TCEA3	8.87221	14.0279	14.3996	5.04009	9.0355	8.91692
IPO7	59.3614	57.1056	68.2236	98.3366	75.8333	102.959			OGT	36.1735	77.0573	60.3462	21.9633	35.4272	30.2781
RIOK2	10.2869	11.0111	9.03073	15.7711	12.2903	14.2251			IP6K1	26.3411	34.1396	45.0722	14.9899	28.7566	33.6554
RGS17	7.71357	9.78169	7.46592	14.2211	11.1462	19.4442			Fam193b	9.33648	23.2549	16.086	5.93473	8.75536	7.67106
ARF6	36.1184	26.7949	29.7434	55.3262	43.3641	64.7864			MTSS1	8.7748	21.45	15.1658	5.19641	23.2956	8.28604
FOXN2	6.41303	6.02735	5.67352	11.317	8.9046	10.1876			YPEL2	4.67479	7.8548	8.10082	2.60906	3.18568	4.22888
TOMM70A	39.8376	34.6707	33.6129	58.7377	46.4702	52.0248			RASSF9	0.4424	0.857517	0.768259	0.130952	0.2702	0.442969
EIF1AX	92.9186	60.7255	64.1332	139.639	110.596	107.863			HDAC11	6.79004	10.1144	11.9004	3.49594	3.46659	5.28596
NOL8	6.45481	7.2424	7.14897	10.5846	8.41997	10.7118			KCNJ2	4.7641	5.05945	8.37795	2.74123	3.21178	1.71194
SLC25A32	4.97633	6.95282	5.57492	8.1205	6.4668	7.64926			JAK3	1.14025	3.13644	2.02702	0.381814	0.951083	1.81363
MAP2K3	64.9628	49.4575	46.6144	99.5421	79.3577	105.259			FGF18	15.7007	23.9969	28.0872	3.36721	7.47165	4.69608
MAT2A	71.4336	74.2243	44.1141	109.109	87.01	95.5347			MXD1	4.25474	6.5963	7.62682	2.59504	5.10924	4.31058
ESF1	11.2741	10.6964	9.43912	17.6374	14.0925	16.8715			DYRK1B	11.2989	13.9513	20.4821	6.65636	10.3537	12.5409
MICAL2	40.9856	32.3887	33.1502	74.9862	59.9689	110.711			GPR157	1.93675	2.02344	3.57811	1.13786	2.88121	1.59964
CAMK1D	1.39145	1.39152	0.871298	2.52801	2.02193	2.75294			LENG8	32.5565	90.2434	61.3464	20.5916	44.3096	34.0775
PLK2	64.0625	52.5781	53.3883	100.784	80.9682	71.9428			WDR45	17.8152	20.0671	34.9116	10.2038	20.8732	35.9334
TJP2	10.9226	6.23907	6.6639	17.2605	13.8746	19.2153			MYLIP	6.86234	6.48639	13.9907	3.8774	1.95475	7.70249
ROCK2	68.2189	49.4253	99.5121	108.016	87.2382	144.753			INHA	3.89676	11.5715	7.96807	1.94002	3.77435	2.77513
SOCS6	10.3754	9.21426	11.3052	16.8779	13.6824	19.8969			TLE2	3.78329	16.5944	8.09805	2.11006	3.98124	4.36213
MOB3A	31.1509	20.3875	18.9523	46.6586	37.8451	37.3205			AMT	1.56535	4.57526	3.42235	0.509111	0.682025	1.06788
ST3GAL1	5.67833	6.85448	6.71536	11.8073	9.75446	18.6695			PRSS35	32.4502	67.6363	72.7466	19.3405	51.1146	53.2917
PRKCA	8.60011	7.5805	8.91615	13.8955	11.4931	17.7889			PDK2	6.70146	8.07709	15.0654	3.72625	3.37164	11.1102
PLEC	46.1926	37.995	50.7198	77.3213	63.979	140.938			RNF167	6.46008	12.4806	15.0569	3.54494	4.85985	6.72357
OTUD7A	0.168766	0.171005	0.42858	0.398352	0.329755	1.90508			KIFC2	1.22285	4.11468	3.59916	0.583864	1.21029	1.39632
ITGA6	5.60569	5.33581	4.50496	10.2418	8.55722	12.8656			ZFR2	1.41513	3.2836	4.53509	0.689116	1.40632	2.08705
SLC2A1	43.5634	31.8902	19.6317	65.2576	54.6612	43.4361			TXNIP	18.455	17.7545	70.6352	12.1206	9.11075	40.8612
LARP4	10.222	10.8306	8.90627	16.2298	13.5966	14.7638			ABCA1	4.54106	17.95	17.5553	2.42169	10.136	11.1793
HIVEP2	2.57422	4.48298	3.53251	5.50968	4.62234	10.2748
KLF13	10.838	9.04252	14.4829	19.7387	16.5643	31.7596
TRIM16	18.9889	11.0956	10.1278	35.1336	29.818	26.4584
PTGS1	6.71027	7.91928	8.14538	12.5634	10.6699	15.5083
ADAM12	4.49067	3.62354	5.68729	8.14855	6.95413	14.1291
LRRFIP1	88.6683	71.2227	50.1273	133.636	114.878	106.328
B3GNT2	8.674	7.8363	9.92316	14.3879	12.6232	19.9981
ABL2	7.31132	6.33385	5.5166	13.3618	11.7878	15.5701
SOAT1	12.5193	11.1402	12.3435	19.6364	17.3726	20.9023
SERPINE1	209.294	76.474	77.9319	632.715	561.293	576.791
TUBA1C	13.245	8.51622	3.48959	20.835	18.678	14.8427
CDK17	12.2126	14.1331	11.5115	19.6781	17.7223	21.9888
HOMER1	5.47885	5.89087	6.15577	9.15261	8.26497	15.6417
SMURF2	25.6136	26.6665	38.1255	43.0888	39.0088	53.2632
DKK2	26.2009	28.6081	13.6814	46.223	42.3013	20.3164
SFN	40.6931	24.5773	8.78959	64.7525	59.3201	26.3695
SMIM15	77.7524	70.593	66.6438	122.248	112.447	95.2736
NMD3	27.1262	28.0881	23.0907	42.0164	39.3709	36.4931
PLAUR	24.7691	13.7723	5.22143	74.77	70.085	74.5628
CCNYL1	9.77761	8.04071	7.95017	15.2007	14.2742	16.0904
EXT1	49.7565	40.1523	60.635	73.5133	69.1646	107.996
TNFRSF12A	167.736	77.4178	113.259	348.078	332.651	431.763
LFNG	2.14439	2.62233	1.26324	4.21842	4.04258	4.37413
MMP13	0.24846	0.278396	0.902506	1.07829	1.036	1.48508
KCNK3	0.104227	0.138469	0.129555	0.417162	0.401927	0.935598
IL11	1.45135	1.40246	1.79892	3.78009	3.68154	11.9347
SYNE3	2.87618	2.36337	3.85105	5.09083	4.97859	10.8413
BDP1	4.4737	5.53163	5.45531	6.84391	6.70325	8.35971
NRP1	26.4903	32.6337	32.4482	38.884	38.289	75.1516
TBC1D1	10.5256	10.0178	7.85693	16.2475	16.0425	16.3477
EEA1	7.61395	10.9546	11.3488	13.607	13.5754	20.7679
RIN1	23.3687	20.1705	17.5519	38.9699	38.9411	47.2871
NUP153	14.0815	15.0896	14.3072	20.842	20.8983	19.3936
SLC20A1	65.6714	83.2436	41.4208	111.841	112.637	100.364
HECTD2	1.52315	1.71941	1.65571	3.00684	3.03595	4.1743
SLC7A11	2.71072	3.46157	1.36631	4.3477	4.41	2.14136
ARHGAP22	4.53806	4.02936	1.35085	7.85525	8.03405	4.81994
ATP1B1	40.2062	35.8231	29.6689	64.5787	67.8092	54.8482
TSKU	21.1097	18.7887	20.3416	34.9927	36.9353	34.3167
FMN1	5.54569	8.72872	5.72895	8.18923	8.85647	8.23713
LRRC32	3.25812	2.06337	1.58818	7.50038	8.11833	5.40077
NT5DC3	8.73821	8.51992	8.7613	13.6243	14.8174	18.6534
ZAK	33.4387	37.2879	32.7352	49.4349	53.7749	55.6048
Pvr	19.1596	16.8311	16.2533	37.3279	40.7738	36.3595
IER3	29.0703	29.6485	51.6716	63.5803	70.3974	100.71
EHD4	18.6019	16.2373	16.7553	29.513	32.6954	39.1864
RRAS2	29.8857	23.5324	28.3341	54.087	59.9259	51.6945
SLC30A4	21.0485	21.7907	24.3114	36.4994	40.7832	44.4009
IL1RL1	10.8632	12.2014	5.44202	42.5128	48.1427	53.4705
ARID5A	2.31636	2.26548	3.69293	5.08187	5.86167	9.02974
IFRD1	60.9577	61.3574	72.7176	95.382	111.312	90.8085
RCC1	15.9211	16.8362	15.198	23.8665	28.2153	20.0266
UGDH	29.5078	36.3137	30.9024	44.999	53.8094	85.9057
NGF	26.2578	31.3963	14.8777	48.2529	58.3368	27.6219
SRXN1	20.6918	28.0525	15.609	37.4158	45.4373	103.352
Sacs	0.969724	0.883255	0.895287	1.88159	2.31871	2.18583
SLCO4A1	0.164332	0.298215	0.350173	0.491664	0.612873	1.47824
CLDN4	0.239214	0.0358921	0.060307	0.792141	1.03119	0.0586991
VASN	30.4314	25.2963	40.0772	46.1448	61.8079	114.725
FAM167A	0.316815	0.225835	0.270342	0.902043	1.24042	1.02526
NFKBIZ	1.90953	4.90609	4.1229	3.36419	4.81443	5.89353
UGCG	35.5517	46.5189	35.2286	62.9653	90.3214	58.1442
PLAU	45.2724	24.9172	16.8219	76.4603	109.744	38.5591
GFOD1	3.08989	2.8729	2.20634	5.52297	7.93574	4.23645
NR4A1	9.53601	4.49378	21.137	18.4045	27.7699	37.1671
NGEF	0.327432	0.550692	0.0612097	0.876583	1.35113	1.47714
JUN	33.3039	55.758	35.2553	77.9873	124.263	137.438
DUSP1	35.6205	19.7844	46.7514	56.883	90.9793	80.8119
RAB23	22.8711	22.9119	24.1972	33.1548	54.9809	36.253
TIPARP	7.24978	18.436	13.7323	12.7599	21.1702	20.4081
NABP1	8.98289	25.0332	10.9076	14.4131	24.3706	12.4367
BRINP1	0.830607	1.82994	1.54007	2.03727	3.87916	8.59408
WNT7A	0.391366	0.527601	0.0723454	0.858717	1.86244	0.0843619
DUSP10	4.53874	8.65253	3.69016	9.09153	23.7747	10.7005
LRRN4CL	4.36382	6.06117	2.7188	8.41204	22.1142	7.57766
RCAN1	20.1043	22.7318	36.4382	47.8613	130.942	126.021
GCNT1	0.69601	2.46317	0.613431	1.78579	5.42683	4.00504
MYLK2	0.112502	0.250595	0.148829	0.524433	1.9317	1.01674
AQP5	0.899242	8.28276	2.24219	2.17262	12.1813	4.08961

## Sheet: ComparedToUntreated
1 hr upregulated	Unstim FPKM	1hr PDGF FPKM	1hrPDGF_PD_FPKM	1hrPDGF_LY_FPKM	1hr FGF FPKM	1hrFGF_PD_FPKM	1hrFGF_LY_FPKM			1 hr downregulated	Unstim FPKM	1hr PDGF FPKM	1hrPDGF_PD_FPKM	1hrPDGF_LY_FPKM	1hr FGF FPKM	1hrFGF_PD_FPKM	1hrFGF_LY_FPKM			4 hr upregulated	Unstim_FPKM	4hrPDGF_FPKM	4hrPDGF_PD_FPKM	4hrPDGF_LY_FPKM	4hrFGF_FPKM	4hrFGF_PD_FPKM	4hrFGF_LY_FPKM		4 hr downregulated	Unstim_FPKM	4hrPDGF_FPKM	4hrPDGF_PD_FPKM	4hrPDGF_LY_FPKM	4hrFGF_FPKM	4hrFGF_PD_FPKM	4hrFGF_LY_FPKM
JUN	30.8793	41.6537	94.05	47.7045	83.6281	244.939	148.292			ADAMTS15	1.45625	0.654958	0.494882	0.68257	0.663222	0.371976	0.372013			IL1RN	0.168944	0.216913	0	0.0268658	0.706903	0	0.083323		KCTD16	0.772939	0.581493	0.574303	0.3023	0.261067	0	0.0542277
ATF3	8.635	19.7688	41.165	14.676	56.1043	156.59	123.212			COL26A1	0.867128	0.549536	0.350531	0.429696	0.423678	0.277854	0.247253			EGR1	11.7116	11.0784	0.746414	18.6999	76.1139	0.405989	221.538		MOB3B	0.502281	0.512495	0.78868	0.17676	0.24638	0.0523921	0.0590361
NR4A3	0.81575	1.49391	3.3982	3.58918	4.5728	10.3802	13.4862			Zfp759	1.07	0.74634	0.596021	1.08368	0.523397	0.355303	0.546124			DMP1	0.093832	0.116009	0.0900493	0.252502	2.10836	0.0307441	7.59339		EDNRA	4.17355	2.51318	1.71696	2.70083	2.0696	0.61804	1.39326
FOSL2	31.4283	39.598	94.4888	39.0945	65.0937	139.993	83.0824			LARS2	484.581	376.589	168.912	230.136	248.062	183.231	233.533			ARC	0.769788	0.685921	0.100784	0.91408	8.51548	0.134693	15.3985		RSPO3	11.6853	10.0662	4.97587	7.9781	4.42693	1.92204	2.00351
KLF6	46.6268	59.2657	81.9763	57.6874	76.8036	162.935	123.086			Zfp61	4.40317	3.74502	3.26688	5.0408	2.57471	1.92583	2.52745			EGR3	0.536038	0.495152	0.203432	0.909524	3.20292	0.0651272	11.1699		TMEM86A	8.20697	7.51511	4.72865	10.2118	4.66202	2.15066	5.36603
IER3	25.4613	34.4132	65.3067	47.5261	63.7907	122.134	134.569			ZNF454	0.878936	0.536394	0.558203	0.505249	0.323867	0.254636	0.219315			EGR2	0.534903	0.506168	0	0.442441	3.80594	0.0823164	4.82301		SLC24A2	1.17924	1.02121	0.657104	0.403896	0.627974	0.29073	0.227488
CSRNP1	4.3982	6.01656	12.1938	3.68072	14.4164	25.1246	20.6039			A430033K04Rik	1.71645	1.48805	1.21225	1.21818	0.906824	0.799603	0.468725			SPRR1A	1.06947	1.4425	0.0995401	0.16725	5.29647	0.121403	0.596328		XKR5	1.25289	0.962891	0.539663	0.864578	0.558746	0.265668	0.578575
RHOB	126.783	140.46	172.453	163.686	196.51	339.288	243.838			EDNRA	4.17355	2.6638	2.28217	5.69563	2.48587	2.2987	4.62066			APLN	2.25011	2.63759	0.27044	0.272037	9.75408	0.264934	0.883027		KANK4	2.75677	2.55616	1.70715	1.81924	1.60804	0.783211	1.87266
GEM	2.12536	3.02995	4.78659	2.17194	3.93074	6.75199	5.40711			Zfp94	1.42995	1.05073	0.765563	1.40405	0.754536	0.744846	0.798566			SPRY4	4.30104	3.89046	0.173747	2.9854	12.7187	0.357166	11.6727		MAP2K6	0.9976	0.87857	1.20401	0.471797	0.2396	0.117888	0
DUSP10	4.39922	5.72923	11.1744	7.12203	9.78564	16.7917	28.4103			ZNF174	0.937019	0.721504	0.733289	1.17276	0.47756	0.480044	0.650612			SPRR3	4.41601	4.92684	0.619406	0.762235	8.68453	0.250133	1.43193		ZNF395	5.454	5.04136	5.24217	7.1126	3.05955	1.53334	5.00762
BTG2	31.191	40.0503	43.8942	46.4245	76.4218	116.541	189.695			Zfp493	0.765905	0.429579	0.235409	0.258628	0.343842	0.359936	0.0590144			ETV5	12.8089	12.4735	0.491711	13.5521	22.8286	0.735413	28.6697		MYLIP	7.86769	6.86234	6.48639	13.9907	3.8774	1.95475	7.70249
KLF9	9.95973	12.1947	22.6483	16.3585	16.2659	24.6633	25.4433			IGFBP5	36.3763	23.7217	24.0472	33.9843	22.8303	24.6154	24.4914			ETV1	0.774808	0.725566	0.100394	1.14912	1.67238	0.0586255	2.41743		ZCCHC5	71.7981	60.6311	15.8378	17.7567	30.4889	16.4128	10.6668
NIPAL1	0.348818	0.53193	1.02397	1.1723	0.792515	1.18081	4.95624			ZNF35	6.61394	5.86546	4.32305	5.6111	3.55133	4.39103	3.85716			SERPINB2	0.0650356	0.062155	0.144106	0.0335215	3.21985	0.123989	5.63212		TSPAN18	4.17293	3.08336	1.31535	1.42749	2.41379	1.34934	1.059
ARID5A	2.46437	3.41988	3.8123	4.71015	5.36908	7.97334	9.90427			IGFBP3	83.4335	59.7844	79.7081	163.364	55.4163	70.2074	147.054			MEGF10	0.608798	0.610107	0.186835	0.470132	1.50183	0.060892	0.902474		CC2D2A	4.37284	3.83911	5.15585	3.21062	2.78015	1.57648	2.18332
CITED2	86.414	116.091	93.0632	88.7275	134.456	192.378	116.095			STARD8	1.66837	1.56503	1.39542	0.674819	0.864004	1.11972	0.759996			DUSP6	10.917	10.935	0.996477	12.0622	51.8018	2.15956	109.436		FRMD4B	1.13832	0.808863	0.478183	0.658535	0.500697	0.304256	0.21393
NFIL3	20.8948	27.6019	43.3508	19.8753	36.9745	52.7134	41.1798			TMEM35	7.55132	6.68418	6.65778	12.1855	4.24899	5.55376	12.7733			PPARGC1B	0.360366	0.329913	0.222722	0.101075	0.806161	0.0406179	0.181383		PDZRN4	0.54685	0.499022	0.741098	0.281362	0.194115	0.118032	0.0294849
DUSP1	30.0065	38.7272	28.3413	35.7969	84.288	119.711	121.858			BBS10	1.49722	1.08503	1.02695	1.15969	0.757306	1.02493	0.815759			Lce1h	0.493916	0.79003	0	0	2.40778	0.14214	0		RASSF4	0.952357	0.959789	1.05784	0.438714	0.49032	0.300096	0.214029
SLC25A25	8.83374	10.87	10.7824	5.82552	14.1073	19.4492	7.52147			ZFP3	2.67199	2.3162	1.84863	2.1874	1.34137	1.85719	1.57234			SEMA7A	0.953833	1.17057	0.663566	1.84534	13.63	0.808304	65.833		GDF10	5.59148	3.27429	3.10981	3.61278	1.89236	1.16092	2.24418
IFRD1	60.4073	75.5676	97.8292	95.7637	101.674	136.918	277.792			CAPN6	55.2416	51.8955	53.9205	74.0211	34.7525	49.1301	62.3833			MYCN	0.166417	0.194543	0	0.0899628	0.943349	0.0586949	0.327661		TOX	15.1534	14.2132	10.8244	14.1393	8.83968	5.47098	7.04212
PTGS2	18.2409	29.8711	45.0787	18.3485	95.8729	120.913	186.5			TRAK1	10.8812	10.9336	9.36766	8.24677	6.77016	9.70685	8.37829			Mcpt8	0.239451	0.167268	0	0.15438	1.71151	0.11206	0.200087		GEMIN8	2.04347	1.81369	1.29485	2.07758	0.987036	0.618887	1.03938
PPP1R15A	27.5076	31.9173	44.0828	25.8861	44.199	54.3688	54.5715			KIF26B	6.76314	4.5108	5.87438	8.65343	4.45377	6.63087	7.14587			PRKG2	1.17972	1.31734	0.925125	0.344339	4.29033	0.297537	1.67212		GNG8	6.21238	5.3544	7.15384	4.81835	3.37323	2.1231	2.6547
KLF4	72.6982	84.1172	85.197	68.176	111.476	136.569	109.95			KCNJ2	6.81804	5.78716	4.50605	6.2945	3.07287	4.66309	3.35925			SSTR2	0.203648	0.298322	0	0	1.1694	0.0946585	1.54835		NFIA	2.96144	2.69698	2.7615	3.8441	1.8885	1.26044	1.31953
PER1	6.77729	8.60841	11.5007	9.47363	12.5747	15.3766	17.6353			KCND1	2.3162	1.92209	1.61849	2.54189	1.09774	1.68715	1.49321			FOS	2.70542	2.4833	0.560238	2.60831	5.00742	0.413485	4.73266		Zim1	3.55799	2.7918	3.09699	0.972046	2.02279	1.35418	0.588722
NR4A1	13.0589	51.0859	37.5008	73.4232	167.733	194.128	349.913			Kctd12b	0.524295	0.536666	0.269546	0.483255	0.236735	0.373174	0.327062			JADE2	1.09231	1.19851	0.35481	1.08743	2.18529	0.186669	1.51711		MZF1	0.426197	0.474973	0.554311	0.56763	0.165175	0.111562	0.428049
ZC3H12A	2.46088	3.39883	4.0832	2.39662	4.16861	4.78668	2.83913			NRK	6.74434	5.7571	5.39097	4.51548	4.04153	6.62443	4.81367			ETV4	5.23804	5.70714	1.33368	3.89999	15.3271	1.36902	13.803		CMPK2	0.462423	0.355229	0.217044	0.223375	0.173652	0.120299	0.157539
OTUD1	4.83626	6.75147	6.77809	9.01993	8.83081	9.83737	16.652			ABCD1	8.04026	7.9879	7.44969	7.7816	4.41413	7.27245	6.62719			Hmga2	74.5808	81.0696	15.1271	50.5944	257.312	25.2317	221.864		LPAR4	14.6384	12.7603	6.58116	10.1663	7.17134	4.9745	4.1519
INSIG1	95.5081	117.916	111.619	41.3928	148.326	158.707	68.0107			MAGEE1	15.462	14.9935	15.7777	15.2472	9.39092	15.6478	13.2713			Slfn2	0.294765	0.377896	0.0395314	0	0.951928	0.0964279	0.0430437		CHST15	17.4473	16.647	6.60617	15.7125	11.0136	7.65529	7.89167
MNT	9.83437	11.8164	18.8778	14.4222	14.7641	15.5016	15.8815			HCFC1	25.8849	24.5212	23.3223	19.0244	14.9621	25.4723	15.814			MERTK	4.07104	4.34065	2.61219	2.73454	9.39698	0.960689	5.29843		MLH1	7.67452	7.10053	5.36262	3.36326	4.33708	3.03182	3.12941
ZFP36	13.9908	15.0862	17.7219	12.6546	35.3566	36.6061	67.1935			BCORL1	4.22517	3.56932	4.08552	2.04128	2.03775	3.50626	2.06501			KLHDC8A	31.7983	38.4682	2.09652	22.1583	107.581	11.0862	101.416		EXTL1	0.607447	0.414483	0.420911	0.409303	0.269011	0.192114	0.328258
C3orf52	0.256551	0.414015	1.495	0.679284	0.664108	0.661647	1.55109			AMER1	3.49189	3.36727	3.6925	3.65171	2.06187	3.55802	3.48297			SPP1	24.7396	25.6176	15.6209	21.0289	182.912	19.3393	120.236		STAT1	7.89612	6.1982	7.63042	8.53855	4.64441	3.33015	4.68583
SDC4	24.6977	27.4874	38.2175	40.5571	40.9869	39.2838	92.1048			PDGFRA	3.99143	2.98798	5.29231	7.59338	2.51546	4.3844	5.39124			EVA1A	3.72735	4.00505	1.06796	1.08311	13.689	1.46112	11.1919		LAMA1	2.80708	1.93048	1.69123	1.66827	1.47394	1.09282	1.47648
STK40	21.7312	24.1891	22.2473	15.9709	33.365	30.4591	27.7397			USP11	13.1319	13.0406	12.1046	17.614	7.5716	13.815	17.2873			F2RL1	16.8627	20.1725	2.27275	6.29331	66.6964	7.37196	40.3074		SLC7A2	1.40824	1.31435	1.14204	1.22261	0.75014	0.558409	0.776353
SKIL	15.0651	18.2075	23.5651	18.3072	24.3562	21.6245	27.8968			ELF4	10.1184	9.58782	13.3368	8.21411	6.31612	11.9204	8.99403			DAPK2	0.446193	0.512184	0.230967	0.441333	1.21007	0.134873	0.863657		TXNIP	21.8639	18.455	17.7545	70.6352	12.1206	9.11075	40.8612
CYR61	336.407	448.692	337.513	422.277	663.991	586.126	794.92			USP9X	18.7284	16.9707	20.2391	21.4846	11.9079	22.564	20.8831			Ccl2	20.2759	20.8081	6.21054	3.50078	56.1676	6.29283	28.2329		Oasl2	1.08105	0.822942	1.19073	1.33696	0.537465	0.405689	0.96145
PLAU	40.546	51.5444	42.1343	21.4881	69.1779	60.6087	30.106			KDM5C	28.912	27.1509	29.961	26.4063	16.2701	31.3005	25.8238			IL18RAP	0.418134	0.507833	0.0612341	0.110986	2.33021	0.268842	0.881821		SLC7A4	1.18706	1.17615	2.0126	0.910977	0.629627	0.488368	0.341515
MAFK	27.6511	31.3208	28.9208	27.9222	43.7529	38.2764	52.0681			ZCCHC12	1.19166	0.910031	0.782222	0.561286	0.49716	0.963303	0.554126			DUSP4	6.03534	6.20231	0.339542	5.6936	25.4756	2.94756	47.8238		MPPED2	6.15531	6.163	4.31038	4.71236	3.59128	2.79105	2.42729
PLAUR	22.5365	27.0592	26.4119	10.965	38.409	33.5315	23.0334			PLXNA3	7.70676	7.67493	8.45628	10.3558	4.72826	9.23245	9.19206			TMEM200A	5.03138	4.99908	2.1233	3.67942	16.4092	1.9007	14.7928		PRKCQ	0.486104	0.422147	0.30286	0.13325	0.204153	0.160599	0.151075
Klf16	10.9763	12.9757	12.9739	8.45276	17.6525	15.1665	10.6892			L1CAM	1.0563	0.938255	1.02161	0.785608	0.533904	1.08081	0.864334			MYCT1	0.224857	0.300589	0.0317737	0.0689972	0.69415	0.0850233	0.17051		SHISA2	1.18127	1.03137	0.465198	0.226652	0.502313	0.401451	0.127795
IER5	25.0777	31.8149	30.5046	20.6082	43.2659	36.4462	54.3719			ARMCX4	10.3927	10.1766	11.8277	5.52682	6.47738	13.6273	4.81129			SPRY1	16.4571	16.0621	3.13184	13.7601	28.9263	3.59316	19.8232		KIF26B	6.76314	4.40209	5.29102	3.58725	3.24642	2.59498	2.44473
LIF	7.43815	9.30846	6.7631	6.07215	16.7356	13.6026	17.7347			BRWD3	2.93583	2.63295	2.8404	2.16099	1.71287	3.81618	2.23449			C8orf4	1.79362	1.55931	1.91329	3.03106	10.753	1.38184	27.1525		GLI2	5.52148	4.86477	4.73028	2.95111	3.06275	2.4526	1.56752
HOMER1	5.67748	6.40499	7.53145	10.6064	9.59609	7.78957	33.945			NHS	2.3066	1.94856	2.31212	2.82946	1.29535	2.95048	2.61981			KCNK13	0.0863205	0.0705629	0.0486834	0.0337849	0.581562	0.0765163	0.186361		ATOH8	1.59998	1.54208	1.02318	1.21121	0.345136	0.276847	0.204281
SRF	29.0654	54.2317	23.7583	14.7123	43.5196	22.0957	34.7684			Zfp651	14.2941	13.5234	19.0303	13.6344	7.98558	18.9207	11.2549			TNFAIP3	2.99282	3.38111	0.786866	1.85955	6.25911	0.876187	3.75492		SLC27A3	32.6204	35.1677	15.4331	20.814	18.9624	15.3204	10.4872
BDNF	19.9175	25.6602	23.481	20.0961	29.6665	23.6557	33.931			EGFL6	13.6486	11.0824	15.696	34.5102	7.58293	17.978	32.9274			UBASH3B	1.81383	1.81194	0.264031	0.50437	4.13051	0.590772	1.66978		TET1	1.27147	1.10951	1.4129	0.686466	0.656121	0.533058	0.383208
SERPINE1	161.034	267.608	221.095	94.2241	513.723	407.342	513.091			TCEAL5	2.80262	2.31504	1.99108	1.80235	1.15081	2.77357	2.27952			ERRFI1	7.05773	6.63622	4.28719	5.4526	45.3614	6.51911	71.3201		MEGF6	7.92893	6.38563	6.28348	4.73251	5.06103	4.1274	4.84548
CEBPB	12.7979	15.5417	14.0367	14.9426	27.3334	21.5789	20.4042			MED12	9.36989	8.95963	9.82207	13.1169	5.12535	12.7416	13.9434			MEOX1	0.884329	1.10429	0.431178	0.196228	3.42574	0.503414	0.720253		FZD8	11.8871	10.8005	10.0245	12.8053	7.36191	6.04948	8.46339
Nppb	2.8512	6.55991	4.1092	1.54368	13.6662	10.7685	13.1054			ZFP14	1.21429	0.914587	1.4218	2.93511	0.592369	2.35915	1.74278			PTPRE	1.83466	1.78567	1.46213	1.21841	3.95846	0.586894	3.27436		CROCC	2.89646	2.64478	3.09427	3.39943	1.77823	1.46246	2.3518
VASN	30.5931	35.557	34.3305	51.483	52.2709	37.7575	85.9946													GJB3	1.60592	1.72393	0.411099	0.312151	4.28107	0.635437	3.27398		RARB	3.60269	2.61369	4.09276	3.64785	2.02773	1.68187	1.64627
PARD6B	1.96938	2.17137	2.96477	0.889518	3.49036	2.50803	1.77988													ZFP36L2	28.2962	30.4137	6.96993	21.5427	105.44	15.9504	114.773		PALMD	3.01948	2.85199	5.84816	1.39493	0.940909	0.78226	0.186255
IRF2BP2	17.0904	19.3723	16.9206	25.0556	25.872	18.2046	39.9016													PHLDA1	12.6375	13.4057	2.49528	6.60752	36.651	5.81093	40.7792		TBXA2R	5.25347	4.87665	3.29585	0.972442	2.10364	1.8091	0.552821
F3	94.5845	125.008	112.697	65.9607	198.785	138.377	150.576													RGS20	0.314035	0.301861	0.039503	0.214069	0.934378	0.150308	0.64572		PPCDC	4.62314	4.35043	5.46275	4.33789	2.37405	2.05751	2.37162
ARL4C	11.3701	12.044	9.3714	8.27144	17.6701	12.1851	13.9658													GLYAT	1.2296	1.2898	0.223111	0.249377	3.68319	0.597023	1.93742		PHACTR2	6.31593	5.55656	7.1029	6.63294	3.94015	3.43954	3.93454
MOB3A	31.9637	37.6342	33.9633	25.1938	47.4069	31.9513	32.5323													RAPGEF3	4.14348	4.75444	1.22655	3.06126	7.27769	1.18694	5.7838		IL15	3.90102	3.75345	4.94361	1.57787	1.06788	0.936416	0.264711
ANKRD1	22.4922	34.64	19.5308	6.97536	43.1	28.4237	11.4648													RGS16	2.43829	2.09075	0.566243	1.4423	20.3734	3.35117	20.3016		RNF144A	3.9245	3.01272	3.65027	2.28158	2.30106	2.05067	2.07871
ZSWIM4	9.01523	10.7212	7.57848	16.5225	14.344	9.37866	25.0003													ANGPTL4	0.714271	0.418538	0.990027	1.73423	2.43948	0.407203	8.9316		TAP1	14.3286	13.9637	11.8593	14.1411	9.32239	8.34551	7.83949
ELMSAN1	8.65321	10.046	11.0654	9.77634	14.3584	9.21171	18.7257													IFI16	0.647061	0.498219	0	0.0821113	1.56683	0.266549	0.369613		GPRIN3	1.47607	1.32973	0.453677	0.271146	0.493131	0.441794	0.0865836
FHL3	37.9656	42.1057	30.1206	23.3715	56.9798	36.555	41.7314													DUSP5	2.77388	3.21049	1.16416	2.42608	20.4999	3.52142	35.5444		PEG3	51.7602	43.0003	44.3603	34.1239	26.3829	23.6746	18.0758
PLK3	6.26425	9.44174	2.09663	8.46829	20.1219	12.4996	26.2747													FHDC1	2.56313	2.95707	0.88251	1.60561	10.034	1.75357	7.0996		ADCY1	1.50271	1.37634	1.10141	0.808587	0.841556	0.759961	0.453543
SLC2A1	42.5734	47.1162	43.9068	30.1697	69.4298	41.7767	49.7823													GCNT4	1.22694	1.36364	0.335024	1.27881	5.23872	0.934211	8.0282		PDK2	6.31441	6.70146	8.07709	15.0654	3.72625	3.37164	11.1102
C8orf4	1.79362	2.39277	1.50654	4.3997	4.49877	2.66531	19.0161													MTMR10	17.1364	16.9246	6.85895	14.1644	58.2128	10.4913	35.0344		PRPS2	19.8917	19.8347	15.0684	15.9727	11.0855	10.1159	11.3998
FOSL1	3.81151	6.16715	4.03418	2.26929	19.9601	11.7557	25.3369													MGP	151.204	157.976	53.8073	148.261	294.859	53.8803	464.326		LARS2	484.581	389.653	153.395	211.319	208.909	190.824	218.548
PIM3	10.5965	12.5911	10.5108	11.1063	16.407	9.1754	20.4403													Pbp2	0.740929	0.750915	0.165041	0	2.20171	0.410613	0.479213		CLMP	12.3168	10.2233	10.0007	4.92731	7.82953	7.20372	4.51928
RGS16	2.43829	3.86648	1.18309	1.3044	7.65499	4.24241	8.45587													FOXS1	0.9509	1.30493	0.453975	1.40158	4.41919	0.825826	6.8617		P2RY6	1.1961	1.00378	0.751539	0.468705	0.428969	0.39894	0.329979
CCRN4L	7.47262	10.1664	7.91971	5.73506	15.4152	8.29039	39.68													BHLHE40	13.4815	14.2939	3.40775	5.50644	35.4739	6.83884	36.8476		LMCD1	11.2204	10.7513	6.05483	4.01498	4.51947	4.28458	2.02177
CTGF	694.523	1038.26	469.012	652.828	1544.29	816.049	1119.23													MYC	26.9538	26.57	5.85282	11.8466	74.9139	14.5579	49.7908		PALM3	4.9763	5.03976	3.71098	0.825247	2.74897	2.6084	0.460909
DNAJB1	36.6083	41.1068	34.7234	41.4288	68.8043	35.6559	153.213													SPRY2	12.0258	11.3417	3.44953	12.8356	22.1435	4.35901	33.4593		SLITRK5	6.02308	5.84073	6.52657	2.70515	3.72503	3.564	1.4003
PIM1	8.20624	11.1842	9.65804	13.6987	18.7899	9.61469	39.8771													NUAK2	4.46503	5.05861	0.714179	3.81378	12.6869	2.58626	10.8528		STARD8	1.66837	1.62441	1.40224	0.793177	0.715846	0.685279	0.677199
FAM110C	4.55235	5.85123	3.97528	4.88859	9.89294	4.9742	16.1868													ENPP1	0.599304	0.532743	0.558472	0.901874	2.34736	0.485743	4.82512		ST3GAL5	14.5014	14.0554	11.2593	9.05536	9.0513	8.71002	6.24996
LFNG	2.20552	3.2498	3.32639	3.26236	6.70341	3.2853	5.63816													GJB2	0.0470169	0.0570487	0.0261723	0	1.79501	0.374057	0.727312		FOXC1	10.9371	12.2567	8.95581	14.213	7.10944	6.86644	8.51685
IRF2BPL	21.881	24.2567	20.7543	22.7934	37.2436	17.7173	32.7374													NPTX1	0.138871	0.181595	0.207724	0.0728935	1.02017	0.216714	1.52762		IFIT1B	1.30911	0.801771	1.62494	1.5297	0.60292	0.582466	1.14668
TNFSF18	4.60415	7.34858	1.88241	2.05179	11.7678	5.57124	7.05449													CX3CL1	7.88039	8.02138	3.27714	6.2264	19.5449	4.16367	30.2912		MFAP4	130.587	112.236	130.816	128.709	87.9586	85.6472	121.42
SEMA7A	0.953833	1.12119	1.52976	2.23826	1.96963	0.92921	6.33399													FOSL1	3.81151	4.60077	0.528388	0.691173	29.1136	6.26304	28.7452		FBXL7	14.116	12.3316	14.8191	11.9494	8.14961	7.94467	5.02869
SMAD7	7.68554	9.7309	6.91427	8.59605	13.6489	6.42171	10.7348													TGFA	1.24227	1.41865	0.563651	0.666818	2.93323	0.636461	4.11329		MYLK3	0.999585	0.80216	0.823144	0.519742	0.450466	0.442472	0.426237
SGK1	14.4199	21.1288	24.3697	26.5811	35.3105	16.3521	145.861													LINGO2	0.955162	1.00486	0.491305	0.42732	1.96837	0.429893	0.605692		TSPYL4	11.4687	10.3669	10.7591	5.91659	7.33732	7.22255	3.48167
EREG	2.07885	3.94386	3.17426	3.30658	6.88901	3.15057	18.1862													TM4SF1	34.5962	39.6569	10.7374	20.9757	76.7083	17.3237	45.6687		HDAC11	7.48391	6.79004	10.1144	11.9004	3.49594	3.46659	5.28596
MAFF	10.0323	14.7922	9.26317	11.6744	25.9453	11.8005	40.3112													NGFR	1.55337	1.32085	0.66747	0.930056	3.14555	0.712051	5.44778		CACNB2	4.20222	4.41672	3.39707	2.47473	2.40341	2.38614	1.01238
ARID3B	0.654499	0.862177	0.687522	1.32573	1.37169	0.623866	3.77415													HMGA1	29.8945	33.4044	13.8994	12.4973	74.9298	17.3146	51.6285		METTL7A	5.95188	5.05364	6.59942	6.25055	2.83473	2.81614	2.65652
SERTAD1	28.5364	35.6033	23.7841	27.2929	55.7859	25.3071	52.4724													CCND1	143.68	141.353	49.793	66.8609	222.454	51.6278	104.917		DRP2	0.72201	0.639743	1.20962	0.629018	0.31328	0.3114	0.562667
EPHA2	45.8309	48.9514	20.8861	28.3224	78.6458	35.5458	55.1532													EPS8	6.59842	6.36763	2.20399	3.50254	17.4268	4.21901	20.5563		DAAM2	7.24267	6.05843	7.03144	4.57701	4.21129	4.20598	3.23437
PLOD3	85.1094	86.2672	74.6563	87.6422	151.109	67.6442	82.4843													EREG	2.07885	2.19983	1.81805	2.09366	11.1518	2.72446	20.2238		CA12	3.35679	3.09734	3.82444	2.75524	1.75057	1.75952	2.2999
MAP3K14	5.21947	6.09333	4.52007	4.05073	9.62368	4.27046	9.30848													TMEM173	7.16387	7.54343	2.20082	3.1072	11.9941	3.05047	7.44817		GPX1	188.252	185.926	97.8623	160.563	109.109	110.115	153.892
TGIF1	37.2868	42.059	28.495	42.6901	62.9565	27.7879	89.1391													Nefm	0.104754	0.109428	0.054019	0.109014	0.394259	0.101036	0.362403		ERG	1.2118	0.697729	1.33402	0.439432	0.40379	0.409597	0.405916
TRIB1	4.01913	5.33209	3.15791	3.48532	14.5579	6.39442	34.3033													SLC2A3	3.75326	3.91388	1.64117	1.92133	7.4397	1.91192	7.28743		STXBP4	5.26587	4.51232	6.18641	6.24254	3.35538	3.4326	3.66487
GCNT2	1.47684	2.02421	1.40912	1.02294	2.94976	1.24445	2.01273													RASA3	13.6092	13.9016	5.27354	11.175	22.0953	5.70693	33.4114		SLITRK6	0.716527	0.595369	1.60792	1.1626	0.323237	0.333153	0.57368
MYC	26.9538	34.4093	6.06071	9.67333	54.6777	20.2368	54.2441													GALNT3	0.526969	0.616264	0.115621	0.179013	1.19157	0.311823	0.287971		TWF2	11.4107	11.221	9.43427	11.4272	5.66909	5.86159	10.9756
NAB2	29.9368	40.7437	29.7326	52.5012	75.8601	27.7036	89.6392													SH2D5	0.344552	0.340028	0.74989	0.808867	0.883975	0.232178	1.26995		KIF21B	2.86491	2.40723	3.18496	0.966685	1.37176	1.43006	0.466256
HBEGF	12.3566	16.9069	14.7008	14.753	58.6515	21.2027	131.955													SPRED1	16.194	15.1792	4.61648	18.9374	24.2297	6.43611	39.7527		FAM69C	3.80563	3.27969	2.2471	1.71057	1.77594	1.86741	1.57819
KCTD11	11.4318	12.4253	6.90748	7.26826	22.6152	7.78172	18.3563													DOK1	20.5943	20.1558	9.30202	20.7319	36.7992	9.88382	39.0769		USP18	1.76329	1.06264	1.15335	1.40812	0.501156	0.53153	0.842266
FOS	2.70542	3.14459	0.407666	5.77314	10.4676	3.57527	22.2553													HBEGF	12.3566	15.7018	6.56259	13.5148	121.066	32.576	251.905		CRABP1	411.138	479.43	196.919	206.167	227.963	242.318	249.896
HIST1H1D	1.24476	2.08662	0.817788	6.76644	2.86228	0.963707	10.2125													KCTD11	11.4318	13.0878	9.58395	7.58047	34.3248	9.24617	34.886		Mapk1ip1	6.78971	6.22524	11.5546	11.0656	3.85521	4.09818	5.07711
HES1	21.6192	32.4005	19.0577	37.1078	50.8759	17.0602	32.7515													HIVEP3	0.48262	0.295071	0.21994	0.49685	1.44532	0.39299	2.98859		AUTS2	3.40041	3.07363	4.50757	2.88399	1.71445	1.82327	1.79484
JUNB	13.0851	21.1676	20.1476	21.956	76.787	23.5306	137.395													UPP1	0.65841	0.563987	0.344964	0.483273	1.74971	0.477726	0.869168		CXorf40A/CXorf40B	27.1496	29.9185	21.4025	26.4544	15.4753	16.49	20.6712
BHLHE40	13.4815	19.4021	6.48898	7.9018	41.5784	12.5312	25.7262													IER2	18.5805	18.275	7.59943	17.2731	49.1766	13.7075	71.6632		LRP6	30.272	28.2272	37.9969	50.0374	20.7362	22.1205	32.1035
IER5L	8.74168	10.3449	8.66432	8.01132	22.261	6.56139	10.5971													RBPJ	12.6305	11.4602	5.97651	13.7623	26.6425	7.43606	24.3564		Rplp1 (includes others)	2037.2	2194.09	1038.19	1531.6	1193.82	1273.71	1460.24
F2RL1	16.8627	18.5409	7.09831	5.48651	27.086	7.77849	7.89299													SYNJ2	9.53657	10.4061	5.55528	6.04581	17.1092	4.87239	12.9387		TMEM119	48.5544	47.2989	36.7446	20.5273	30.4046	32.7398	16.7182
FOSB	0.277911	0.829505	1.68541	1.28761	4.60774	1.28161	18.2226													Sprr2k	1.47954	1.68748	0.653563	0.73116	4.23366	1.21103	1.9848		NARF	9.43711	8.75027	11.354	11.5862	5.80296	6.30327	6.76189
SPRY2	12.0258	12.9132	2.67767	13.5177	20.7009	5.717	47.7235													ANKH	7.00446	7.87068	4.99247	10.1794	25.9955	7.45186	42.0388		VSTM4	1.39784	1.07226	1.80782	1.10532	0.718458	0.782722	0.394935
KLF10	8.52745	11.4395	8.17122	10.2144	30.8152	8.09078	27.9056													TMCC3	9.29083	9.71165	4.22747	7.07836	29.513	8.49316	34.0262		SH3TC2	3.94612	3.40471	4.30655	1.10279	2.25505	2.46295	0.678532
IER2	18.5805	21.141	9.22555	21.0458	61.4178	16.0096	103.189													TFPI2	0.516365	0.509386	0.391765	0.0455935	1.56604	0.451625	1.18297		HYKK	3.08741	2.72334	2.62361	2.64624	1.42083	1.56743	1.53902
ERRFI1	7.05773	11.6562	5.35396	9.565	37.2721	9.61207	128.341													VCAM1	26.4832	26.6092	14.4894	13.5169	54.3849	15.9093	25.0187		CCNB2	14.5294	13.4568	10.8504	5.93289	7.99562	8.93472	5.482
PHLDA1	12.6375	15.4179	2.21057	7.89266	37.8123	9.55273	40.7664													SEMA6D	0.555349	0.456925	1.14187	0.844706	1.29001	0.378077	2.69939		PLEKHA7	3.54522	3.40609	5.59757	3.25278	1.55904	1.75119	0.845819
DUSP4	6.03534	7.52236	2.60398	6.71149	16.6599	3.92759	32.8888													TNFRSF1B	2.74417	3.27993	1.39066	1.26997	4.63966	1.36555	2.32444		SNTB1	3.53183	2.98521	2.91501	1.01392	1.95021	2.20332	0.644252
KLHDC8A	31.7983	33.5722	11.1442	14.1262	49.3235	11.3368	19.6968													TMEM171	0.149372	0.253624	0.06092	0	1	0.297201	0.331927		ZNF467	6.13116	5.86018	8.1507	5.95194	2.84927	3.22734	2.11783
DUSP5	2.77388	4.62605	1.9568	4.18617	22.5696	4.8683	46.2228													GCNT2	1.47684	1.28681	1.08145	0.968528	4.75529	1.46791	6.25267		PIK3R3	15.2903	14.9938	23.6032	10.5149	9.48076	10.7872	4.99932
NUAK2	4.46503	6.18647	1.22292	3.09836	12.8287	2.49875	7.80107													TUBA8	0.119362	0.164051	0.113982	0.048439	0.743045	0.229597	1.2566		NOTCH3	22.1432	19.107	17.8883	25.325	12.2249	13.9271	20.4192
ZFP36L2	28.2962	32.5401	7.46212	29.1304	81.9503	13.5811	84.8406													P2RY2	0.895913	0.975817	0.389927	0.265316	2.33765	0.722528	2.3759		KCNJ15	0.838762	0.726178	0.603723	0.300241	0.412841	0.472876	0.201438
SPRY4	4.30104	5.16192	0.221565	2.60492	9.03638	0.891066	6.15517													S100a7a	0.491194	0.895732	1.05402	2.10468	2.233	0.695253	2.1338		PIK3R4	10.2055	10.1692	9.11231	12.6027	5.96349	6.86005	10.8179
DUSP6	10.917	12.9126	0.891446	16.2046	35.8371	2.45703	74.1365													IL34	0.786746	0.740618	0.330654	0.235041	2.16661	0.683232	3.36		SCN2A	0.552914	0.384272	0.828864	0.473783	0.277917	0.323546	0.272618
ARC	0.769788	1.41524	0.32221	2.96423	19.1665	0.71008	68.6969													TNFSF18	4.60415	5.2675	0.490889	1.38486	20.3097	6.4644	7.10613		KLHL29	5.56778	5.1603	5.30608	5.26812	3.00918	3.51953	3.40849
EGR4	0.0905054	0.531897	0.0273961	0.084205	3.84287	0	2.17536													MAFF	10.0323	11.8052	2.32095	9.29762	25.1526	8.02362	30.2024		KCNJ2	6.81804	4.7641	5.05945	8.37795	2.74123	3.21178	1.71194
MYCN	0.166417	0.215358	0.0433818	0.0746746	0.476532	0	0.0889767													MAP3K6	1.56448	1.8062	0.728784	0.621948	3.25263	1.03856	2.5468		PRRT2	2.06088	1.80935	6.40222	2.47656	0.942691	1.1068	0.905211
EGR3	0.536038	2.56169	0.338172	5.41244	20.8603	0.390243	69.7247													POLR3G	2.12214	2.2933	1.45349	0.779165	3.84055	1.23884	1.54695		Fam184b	0.373738	0.298316	0.135857	0.0397269	0.132785	0.155906	0.0559088
EGR1	11.7116	23.4467	1.05393	55.3283	118.41	1.56426	395.475													SIPA1L3	8.17231	8.11641	4.9471	5.4364	12.408	4.02716	10.6227		ID3	49.18	48.9429	44.763	41.1626	19.8909	23.4802	12.4245
EGR2	0.534903	2.46681	0.166523	2.55164	12.2864	0.152612	28.0977													MAST4	8.81269	7.39252	4.64093	5.69643	14.2226	4.63763	16.2438		ROR1	4.42396	3.52217	3.06639	3.92119	2.62296	3.10915	2.87095
																				FAM110C	4.55235	4.80184	3.38764	6.50859	15.1544	5.06705	25.0948		CAPN5	3.15875	3.26431	3.17382	3.74656	1.84513	2.20285	3.27391
																				SGK1	14.4199	14.7063	13.6052	17.5474	47.228	15.8653	98.6117		Anp32a	27.2559	27.8533	23.9474	16.7451	16.2742	19.4944	17.4257
																				TMEM37	8.75734	9.54755	4.63838	5.04882	15.6519	5.28633	14.7428		HDAC8	6.77286	6.13748	6.19182	8.08161	3.70282	4.44036	6.61739
																				ITGA4	3.7693	3.60652	2.84481	2.46525	7.15792	2.43177	5.05828		ZNF423	2.85307	2.22293	2.14946	1.48754	1.47693	1.77712	1.28405
																				PKP1	0.195291	0.229768	0.294533	0.117787	0.959586	0.332445	1.46926		ABHD14B	10.36	11.6786	13.6922	11.7975	5.01878	6.05799	8.44316
																				PLK3	6.26425	6.3843	1.36233	5.41785	13.9963	4.86743	17.301		VPS13C	3.08493	2.43966	2.63073	3.77759	1.79085	2.16825	4.12267
																				PCDH20	1.07932	1.10114	0.629535	0.647324	1.85686	0.646721	0.547003		YPEL2	4.76934	4.67479	7.8548	8.10082	2.60906	3.18568	4.22888
																				ADORA2B	1.9651	2.20977	0.897825	1.10499	5.93444	2.10488	5.07665		TRAFD1	35.9652	36.4753	38.3659	43.4363	23.546	28.7848	28.9512
																				LGR6	0.141427	0.197239	0.158409	0.119358	0.41	0.145994	0.40311		FGFR2	11.0044	11.7975	16.1587	8.30308	7.14721	8.79658	5.5002
																				SOCS5	14.9444	15.1095	8.27105	13.5797	31.0507	11.1532	42.3102		ENTPD3	0.969447	0.803814	0.568366	0.887101	0.353968	0.43694	0.713502
																				KCNF1	1.37093	1.44314	1.33401	0.450741	3.2138	1.16176	1.80214		PMP22	89.2714	88.7388	90.5833	61.9419	52.1425	64.4939	32.2659
																				SLC14A1	0.54688	0.58174	0.23133	0.241745	1.97395	0.715401	3.42226		FRY	0.9956	0.801279	1.07827	0.40661	0.381	0.472128	0.231529
																				KRT19	0.471383	0.646684	0.119683	0.133892	1.34329	0.489375	0.215228		CDO1	39.1548	33.4889	24.2591	50.2487	23.6593	29.4739	25.2927
																				LBH	79.3664	80.7808	32.2157	87.4292	162.484	60.251	204.339		STAT2	10.483	10.1119	16.6095	14.1006	6.81457	8.53034	7.46952
																				FLT4	1.90811	2.24644	0.671055	0.927523	3.82333	1.42402	3.68592		FZD2	47.3201	52.411	44.4955	34.4887	31.5615	39.6236	21.8856
																				RCL1	14.2987	14.502	6.45319	7.14188	23.7689	8.88808	16.8021		D430019H16Rik	0.572032	0.593536	0.579876	0.258608	0.28453	0.357272	0.151265
																				STC1	0.980519	1.00831	1.61121	0.790375	4.3373	1.65246	3.92882		KLF15	1.92313	2.01934	1.49886	1.66345	0.853777	1.07265	0.555388
																				CCRN4L	7.47262	8.15001	4.98635	5.33417	21.7424	8.35248	30.5967		INSC	6.00816	4.43602	4.92941	2.12553	2.31576	2.91408	0.94844
																				SEMA3E	10.0096	11.0407	6.05432	4.28893	15.4833	6.03037	4.39148		HMG20A	12.8361	12.8042	13.7705	17.1078	7.58993	9.57217	13.0365
																				GREM2	4.71733	5.0629	3.41458	1.70294	8.54061	3.3708	3.53783		CELSR2	0.431119	0.324967	0.552466	0.275113	0.227581	0.287176	0.288777
																				C12orf45	11.5364	11.4089	7.08161	10.5215	19.4191	7.67465	18.8966		Kat6b	8.14782	6.96142	10.7857	10.583	5.30717	6.73024	6.15637
																				DIMT1	1.91641	1.98686	1.94718	1.99199	3.42336	1.37213	2.96046		ACCS	4.16001	3.7088	4.7166	5.68958	2.25999	2.88681	2.66114
																				JUNB	13.0851	14.1298	10.7239	14.8648	35.4663	14.4235	57.0327		PIK3C2B	1.90014	1.90338	1.99001	1.11018	1.08043	1.38241	0.647519
																				ANKRD1	22.4922	24.4724	9.45589	6.42804	55.0661	22.3973	10.9524		TBL1X	50.8002	45.9703	45.8439	52.7753	29.2362	37.4611	43.0566
																				BTG3	1.58804	2.23655	1.02325	0.670429	3.59823	1.46669	0.872933		CCDC37	0.478171	0.350525	1.85307	0.272393	0.18317	0.23504	0.194454
																				KCNN4	0.937598	1.14896	0.251537	0.335948	3.50236	1.44364	1.88692		SLC40A1	5.23262	4.31349	8.5662	4.65074	2.90596	3.74763	3.60962
																				ELK3	26.8632	29.2308	13.4165	18.1239	45.7613	18.9254	41.449		PTX3	270.821	278.479	226.739	279.863	155.091	202.271	129.014
																				FGD6	1.21895	1.23413	0.775321	1.00456	2.07811	0.878711	2.14493		RAB9A	32.7699	33.1605	37.1974	29.168	18.4958	24.1614	18.4204
																				EMP1	196.141	215.212	79.0828	169.232	410.192	174.394	592.444		EEF2K	14.2701	14.8863	13.3799	8.9988	9.63544	12.6716	5.0336
																				S1PR1	12.8223	12.7703	5.44217	7.82785	35.3864	15.0482	29.3423		PPP1R3C	0.44471	0.547045	0.756268	0.487012	0.131577	0.173762	0.266315
																				LIF	7.43815	8.48867	4.93529	4.90582	14.2822	6.08671	19.906		MTNR1A	0.67258	0.590883	0.746976	0.24098	0.183202	0.242923	0.29091
																				PTPN13	6.55083	6.19405	4.63614	10.1599	10.5991	4.521	17.9262		FRMD3	3.90316	3.05563	2.67542	1.17214	1.96518	2.61376	0.554389
																				SLC4A7	15.0798	15.3711	10.6781	15.8313	26.1889	11.1948	28.159		IGFBP3	83.4335	54.0561	76.5418	115.647	51.8004	69.0672	115.911
																				SH2B3	12.2953	12.9352	7.52251	14.1254	19.2809	8.25096	28.6912		SIX5	7.89395	8.22292	14.7027	9.84749	4.56003	6.08507	4.79264
																				Nes	12.88	13.8822	5.62114	7.42273	37.6117	16.1555	52.7033		WSCD2	7.08817	7.76157	6.71427	2.55729	2.57601	3.44115	0.486069
																				Nolc1	21.3237	21.0475	11.7844	9.1689	33.9268	14.5896	18.8798		RAB27A	2.51407	1.91652	1.79927	0.812183	0.991477	1.33562	0.781089
																				DHRS9	0.266761	0.241681	0.132116	0.0739951	0.625916	0.271771	0.0720223		HCFC1	25.8849	24.7406	21.6893	15.3693	16.6761	22.5786	19.8079
																				DOCK5	6.12847	6.06	3.46183	4.64673	11.2495	4.89994	18.0866		SFRP2	84.0015	68.1394	94.9611	81.5826	49.9014	68.2014	70.8754
																				KLF10	8.52745	8.66534	6.60369	4.52718	22.2362	9.71704	33.088		RNF167	7.28531	6.46008	12.4806	15.0569	3.54494	4.85985	6.72357
																				TNFAIP2	8.13795	8.79007	9.36451	13.951	17.9094	7.92914	55.9726		Foxp2	2.43629	2.3037	3.48995	1.9306	1.42415	1.97036	0.900584
																				CD34	22.9405	23.9129	15.4147	15.8675	41.8265	18.5343	24.534		ALX1	8.11148	8.27722	8.28315	9.58567	5.0138	6.95112	4.89147
																				TGIF1	37.2868	37.9336	24.7683	42.7554	75.0392	33.2595	97.5887		FIBIN	93.2676	82.1497	75.6352	88.8826	63.0682	87.6095	47.1653
																				OCIAD2	1.7774	2.28839	2.37854	2.20723	3.50573	1.56041	3.99249		NYNRIN	20.3959	18.5699	24.3531	21.2632	12.2368	17.0691	12.7653
																				OSBPL3	8.80197	9.67701	4.13499	7.05573	15.7118	7.05736	15.1909		CYS1	0.846013	0.575409	0.562385	0.527929	0.301212	0.421279	0.293719
																				POLR1B	6.74129	7.0572	4.02622	2.80506	11.2322	5.07223	7.28545		RBP1	8.3403	8.27982	6.6903	5.38441	4.83378	6.77765	5.44601
																				ANKRD28	11.0752	10.9256	9.73954	13.1328	23.1572	10.4673	34.533		TSPAN3	186.55	189.412	155.054	209.298	120.741	170.004	206.347
																				ELFN1	1.32603	1.94808	1.17436	0.694038	4.64305	2.14562	6.06308		HSD17B10	68.5427	68.7563	55.2997	59.7841	40.7341	57.8945	60.898
																				VGF	0.282948	0.392984	0.094193	0.357198	1.13577	0.52597	2.21578		GAB1	14.3946	13.1635	15.8398	18.3251	8.75603	12.4656	9.48336
																				HES1	21.6192	25.3246	17.8274	24.7566	36.899	17.2104	46.221		USP11	13.1319	11.932	15.0254	18.709	6.28506	9.1281	14.3624
																				F2R	135.988	148.641	103.643	215.297	288.29	134.678	500.626		EPHB3	26.9799	28.2878	28.024	28.6069	17.1686	24.9824	19.3794
																				RASSF5	6.42281	6.46669	3.81155	7.21826	10.7058	5.01615	10.8117		SLC7A3	29.7582	29.9768	27.2685	19.579	18.7353	27.3563	17.2366
																				RAP1GAP2	1.31504	1.31395	0.36914	1.38878	3.03015	1.42038	4.63149		ZNF579	11.4023	13.6227	18.9093	12.7527	6.09916	8.93668	4.47809
																				MDN1	3.47485	2.62541	1.83629	1.86124	5.21942	2.45451	5.13901		CELF5	5.44894	5.18177	8.17885	4.26355	2.38464	3.49519	1.5549
																				RND1	4.6245	4.55978	1.45935	3.9864	9.2676	4.36341	6.4837		IGFBP5	36.3763	22.3745	44.874	19.4963	21.5323	31.5759	19.4502
																				9930111J21Rik1/Gm12185	0.601976	0.603273	0.138774	0.2143	1.46974	0.692515	0.496211		SPATS2L	12.6671	10.7557	13.6074	14.239	7.83197	11.493	8.18471
																				Irgm1	40.7717	42.9573	11.3425	25.2578	60.4921	28.7263	26.9088		KDM6A	8.93341	8.02396	9.7756	8.89312	4.82806	7.10694	7.80121
																				IFFO2	15.13	15.1651	8.32488	13.402	29.209	13.9887	44.4019		PM20D2	0.712521	0.583362	0.786584	0.429955	0.320038	0.471599	0.349582
																				PDK4	4.19056	4.29539	4.28568	8.7257	7.17927	3.44232	18.2024		EBP	26.0629	27.6856	22.1896	10.6558	15.4539	22.8931	9.97849
																				RNF39	0.809869	0.761834	1.25409	0.647929	2.20099	1.05542	2.96482		CLEC14A	0.398119	0.2857	0.642515	0.107717	0.115254	0.171299	0.108305
																				GRAMD4	5.64074	5.74846	6.11603	7.74817	13.8176	6.62714	25.7508		ANKRD44	7.83115	7.92638	10.6963	7.21777	4.48191	6.66326	3.06072
																				EPHA2	45.8309	48.4785	11.5282	29.4014	87.4451	41.9482	83.0257		NME6	10.6804	9.7788	7.46429	4.40824	5.26766	7.83454	3.77238
																				BCL10	35.8018	37.0412	24.7123	37.6636	64.5304	31.0357	65.3773		BCL9L	32.8371	34.7471	31.4761	29.9229	21.4636	31.9393	17.2542
																				NETO1	0.492851	0.576622	0.283758	0.0936352	1.03249	0.497326	0.122331		G0S2	3.81897	3.4736	3.40251	0.775381	1.72738	2.58351	0.198496
																				GPATCH4	14.0089	14.2262	6.50578	4.82095	21.8892	10.5518	14.3158		GPC4	271.961	256.037	236.508	376.642	169.291	253.983	352.673
																				Dynap	0.748134	0.936643	0.193643	0.444546	2.91175	1.40515	2.3132		MTHFS	3.06218	2.78996	1.90176	3.76286	1.07446	1.6205	2.42395
																				LIPG	7.97859	8.99197	4.62964	2.19375	13.6287	6.60434	3.71385		ACVR2B	0.716416	0.713549	0.692063	0.731107	0.263905	0.398627	0.650824
																				ITGA3	18.8065	21.7845	16.5122	13.9892	38.7705	18.7885	36.3487		TMED3	72.1995	68.8333	62.7946	86.2373	43.706	66.1357	74.1586
																				SPHK1	5.88481	7.14583	2.17797	4.78956	18.0863	8.79505	30.3521		NICN1	15.0372	13.8724	16.3235	16.5966	7.50445	11.4044	13.5382
																				RRS1	25.0153	25.4847	11.9018	9.84212	42.3861	20.7159	24.2768		TIMM17B	19.9708	21.8151	15.8047	16.4243	11.4425	17.4723	16.4556
																				PHC2	43.2907	43.1228	26.05	42.2251	71.2883	34.9412	83.7272		TMEM35	7.55132	6.65801	9.18227	7.49429	3.6245	5.54114	8.57471
																				DDHD1	4.76666	4.954	4.85069	5.15474	7.50848	3.68807	8.07904		HYAL2	27.6202	29.7107	20.268	19.9715	17.1449	26.2506	26.6216
																				ARNTL	11.9964	12.5998	6.58308	14.8005	23.6448	11.6162	29.5315		HMGCLL1	5.97427	5.65969	5.44315	5.71624	3.00317	4.6569	3.02039
																				RASA1	15.4491	16.5108	14.6959	22.1068	29.4797	14.4941	38.6428		DYRK1B	10.4255	11.2989	13.9513	20.4821	6.65636	10.3537	12.5409
																				GFPT2	3.35026	3.84723	3.09347	1.88096	6.80534	3.34673	7.14207		HTRA3	6.29354	4.61682	7.86193	7.43839	3.87798	6.03656	7.77286
																				TMEM154	2.03607	2.07384	0.742673	1.04032	3.40996	1.67782	1.79641		ARHGEF6	6.23709	6.00016	7.17467	4.54109	3.20689	5.02026	3.19024
																				MAP3K14	5.21947	5.76056	4.73566	3.51752	8.13737	4.00895	6.63349		BEX1	10.7773	10.5552	6.15868	4.45624	5.69216	8.91862	4.63031
																				FKBP5	3.75335	3.83743	1.60882	3.67913	6.63364	3.27035	11.0517		SEMA3F	28.4115	30.2964	28.9269	27.2617	15.9617	25.0616	32.3183
																				RAI14	47.3839	47.1194	40.7807	44.8686	71.5638	35.468	71.5565		RGMA	5.55087	5.30192	7.57655	3.9403	2.34715	3.6977	2.07505
																				DYRK3	2.71989	2.85572	1.49574	2.17975	5.31	2.63801	4.31937		ARHGEF9	2.49403	2.22062	3.69512	3.17888	1.32704	2.09938	2.06298
																				Zfp52	4.15708	4.4712	3.7265	3.59695	8.21052	4.09063	7.24807		SKIDA1	1.95207	2.172	4.05622	1.88565	1.13823	1.80251	0.541847
																				SLC25A37	6.97513	7.79848	7.5737	5.73043	11.1705	5.57525	7.41714		ASAP3	4.92022	5.46152	7.45863	6.91632	2.62246	4.15336	3.49575
																				CYTH3	29.9768	31.1766	16.5027	36.1634	55.8468	27.9036	97.3871		TCEAL6	7.19107	6.75575	9.19501	5.25458	3.53789	5.61124	5.47628
																				AIG1	9.94839	10.8114	6.66485	10.106	16.7073	8.38933	17.1394		UBQLN2	27.3946	27.8214	27.701	26.0772	17.2837	27.4168	27.0233
																				FLRT2	34.0584	34.4482	24.3677	32.0975	52.4498	26.3925	44.2015		PARP3	41.4445	42.8775	48.4883	31.0912	21.0228	33.4914	23.311
																				PIM3	10.5965	11.2758	10.0132	11.7233	19.2001	9.68745	14.6269		AGTR2	92.1116	74.3558	95.5409	140.418	54.1126	86.3622	99.1881
																				NOC3L	9.41666	8.74713	7.12091	7.64213	15.4341	7.80865	14.5711		APH1B	7.66153	7.05796	7.17202	8.32033	3.93907	6.29618	5.71432
																				TEAD4	4.09863	3.97557	2.98949	1.5258	7.73571	3.93648	6.79775		SYT11	10.9978	9.0961	12.899	9.44888	6.9428	11.1058	6.63568
																				NCAM1	36.369	38.0134	28.5251	39.0669	55.1102	28.2023	72.0367		ADAMTS5	99.7605	89.258	92.9239	41.6269	56.8887	91.967	17.5036
																				SLC25A30	8.37069	8.11598	6.15485	19.8927	13.2859	6.80476	31.1225		TMEM26	0.633767	0.379986	0.847601	0.336405	0.299604	0.484841	0.264663
																				TTC9	3.08044	3.66881	3.71426	3.56106	10.3706	5.39763	21.6792		RAB3IL1	4.88772	4.65442	5.88098	3.78598	1.7815	2.89934	1.82422
																				GRWD1	15.9025	16.7988	7.51202	6.14523	28.1362	14.6744	18.8512		ADAMTS7	8.35339	9.22711	9.91556	8.55921	4.01474	6.59142	7.12476
																				E2F6	36.7838	38.766	18.4161	32.4304	55.7126	29.1521	50.526		KCND1	2.3162	2.08895	2.43752	1.93444	1.0026	1.64679	2.36618
																				FAM131B	5.06871	5.43897	2.44798	6.45674	8.10345	4.2438	13.0378		RNF144B	2.96767	3.25679	2.46255	1.64882	1.66547	2.73567	0.584586
																				RSL1D1	63.1947	62.3684	46.2626	44.5183	94.7604	49.8816	66.3964		NUDT16	5.01287	4.47619	6.15315	7.79381	2.32792	3.8244	4.93568
																				TRIB1	4.01913	4.23677	2.00889	2.70866	11.2487	6.03463	13.6201		BEND5	3.14151	2.20351	3.62097	3.32313	1.3126	2.1574	1.43867
																				F3	94.5845	104.574	61.034	60.7279	232.888	125.933	110.072		SLC25A38	19.8738	19.4912	19.6534	20.0138	11.6982	19.278	19.4408
																				NIFK	23.7369	22.8975	13.2436	14.1469	39.9677	21.6674	31.3027		CYB561D2	6.15384	6.76448	5.51947	4.15163	3.40996	5.62244	5.23793
																				CAV2	39.7852	45.8199	33.0646	34.0638	78.9498	42.8606	49.4834		PCCB	19.6279	18.1558	18.2678	17.5386	9.8462	16.3732	14.8376
																				IL4R	2.8358	2.98924	2.13225	3.6499	5.25719	2.8713	10.4381		MRGPRE	2.69112	2.38094	2.93261	2.12696	1.15336	1.92081	0.563508
																				Ivl	0.0836653	0.11779	0	0.0563213	0.828568	0.452872	1.26013		TRAK1	10.8812	11.0159	9.73961	10.9513	6.63433	11.0919	9.62581
																				CMTR2	3.61141	3.4301	2.22678	1.62625	6.00345	3.29884	4.01076		NDUFAF3	9.26137	9.98527	8.97643	7.69468	4.57296	7.65822	5.9306
																				MTAP	49.8824	51.7552	41.0131	39.2082	80.5	44.2402	63.1511		BMF	1.74528	1.73808	5.3433	2.38507	0.569918	0.956582	1.08077
																				GEMIN5	7.23867	7.24431	4.77832	5.7699	11.274	6.20042	9.79475		TLR7	0.914297	0.727101	0.587741	0.127477	0.195584	0.32851	0.0884156
																				KRT18	3.08937	3.23805	1.78606	0.95326	8.58799	4.73207	3.68619		PDZD4	5.32837	4.9247	4.83453	4.48987	3.16677	5.32452	3.50672
																				CHCHD4	10.8367	10.3989	6.6974	7.14017	19.2376	10.746	12.2977		NFIX	59.3826	57.3538	70.6191	61.0925	38.293	64.4057	39.9119
																				TAF4B	1.51041	1.55141	0.994806	1.15284	2.5748	1.4395	2.27776		IDH3G	47.7464	54.0302	49.8645	50.2228	28.5225	48.0719	50.463
																				NOL9	16.6008	17.2055	11.017	11.3644	25.9485	14.6275	21.6985		CDON	12.2388	10.1724	21.8323	15.1806	8.05358	13.5825	11.4496
																				DDX21	36.8527	35.696	22.8389	22.9503	61.0547	34.4671	48.3511		FAS	35.05	33.6929	48.3236	48.9154	20.0544	33.8524	17.4548
																				MEDAG	24.8741	27.3078	17.4997	22.8719	41.467	23.5517	48.4283		OLFML1	4.21279	3.22619	7.8402	2.39274	1.42089	2.40882	1.21038
																				CFLAR	11.2465	11.9938	8.47445	21.2134	18.9596	10.7862	28.5315		MAGEH1	29.5615	29.3976	29.8313	25.3024	17.7711	30.2505	23.6837
																				HEATR1	8.7256	8.47962	6.66381	5.43729	14.194	8.07957	12.8243		Bex1	6.08795	5.24679	3.33736	3.04932	2.79514	4.77851	3.30494
																				SMAD7	7.68554	8.72021	4.52098	7.37706	11.788	6.7212	10.4153		PLXNA3	7.70676	8.42718	10.1473	11.8707	4.68134	8.0285	8.31475
																				HTR2A	0.795411	0.896704	0.681832	0.147587	3.09809	1.77666	0.679809		GFRA2	16.3027	15.0996	22.9765	6.28513	9.32864	16.0197	5.0746
																				RPF2	9.86741	9.56072	6.38987	5.51478	16.581	9.51569	10.1611		SCAPER	4.10703	3.48227	5.52557	5.09255	2.26799	3.90058	5.15551
																				TP53BP2	11.2165	10.9825	12.2623	14.3095	18.046	10.3589	27.0385		PHIP	6.88354	6.37615	11.4448	9.6304	3.95727	6.82571	8.63517
																				NIP7	12.6517	13.6318	9.04151	8.23122	19.9229	11.4742	13.6767		MEGF9	14.0509	12.9302	18.9316	14.6641	8.13127	14.0633	9.48342
																				STK40	21.7312	20.7912	16.3024	17.0369	37.3951	21.5423	38.5973		DIXDC1	3.26752	3.24431	4.91367	3.12425	1.73368	3.00754	1.88976
																				IER5L	8.74168	9.95429	5.73092	6.89799	14.8395	8.55855	15.7204		DCAF12L2	0.889282	0.99831	0.514781	0.204936	0.312791	0.543049	0.117094
																				SLC29A2	1.79271	1.76261	1.31188	1.07651	3.28918	1.89989	2.05904		UQCRC1	94.7578	102.274	80.7821	81.0383	57.182	99.4804	86.4735
																				MTCL1	1.82496	1.9463	1.47269	3.39643	3.22752	1.86885	8.67671		DDX26B	3.97765	3.95927	11.0057	5.64467	1.96529	3.43129	3.0312
																				ARL4C	11.3701	11.9099	6.8854	9.74529	24.9553	14.5046	25.9133		LRRC75B	5.87728	6.06707	9.96454	3.13043	2.78139	4.8656	1.55877
																				Pwp2	9.28864	9.93229	6.229	5.11422	16.3706	9.52812	12.1333		CLSTN2	17.8439	14.1752	20.0452	22.0135	10.4342	18.259	22.53
																				NOP2	29.142	29.1425	18.3281	18.1097	47.3563	27.6432	36.5277		CAPN6	55.2416	51.1055	54.8937	53.3977	32.1478	56.3131	52.2744
																				FHL3	37.9656	43.4275	23.6015	23.7034	62.0314	36.2848	60.3785		GNAI2	277.622	299.562	239.721	240.281	161.009	282.688	261.1
																				SIPA1L2	2.48389	2.80292	1.76603	4.34962	4.94236	2.92709	19.1095		GAS1	20.3776	18.6439	40.7359	21.1955	9.43566	16.5816	14.7212
																				LRRC8C	22.0142	22.781	14.2673	19.0673	40.5113	24.0621	49.0766		Lage3	41.6856	40.3815	37.5949	38.8065	22.1477	38.9407	28.5453
																				OAF	29.9605	30.1234	21.0906	19.4013	46.193	27.482	56.569		MAGEE1	15.462	15.2199	16.1055	17.0335	9.33482	16.4385	16.3786
																				NOL10	15.1331	14.8557	11.2225	8.87731	24.6843	14.7123	18.2614		SETBP1	10.6052	9.26641	10.1749	6.4336	6.43176	11.3587	3.38184
																				CAV1	508.002	572.106	384.79	473.187	875.249	521.734	792.201		PLXNB1	8.77583	8.7915	12.0587	6.59015	3.7581	6.64948	5.01508
																				TEC	2.98506	2.86802	2.66744	2.76267	5.0772	3.02745	9.9966		LIMS2	17.5598	16.8425	15.9389	10.4414	10.0249	17.7561	5.73975
																				FOSB	0.277911	0.292649	0.304973	0.408936	0.834044	0.501538	1.43757		MED12	9.36989	8.49192	15.3531	11.5413	5.27839	9.35334	9.76537
																				LHX9	5.89539	7.44285	6.95403	8.304	10.0234	6.04236	12.8211		RCSD1	2.78302	2.58647	2.9081	1.00753	1.20622	2.14261	0.358753
																				Ankrd50	12.9768	12.4346	10.9376	17.0758	20.4259	12.3149	29.928		ACAA1	42.1424	42.7261	50.6769	44.1981	23.0596	41.1162	40.7528
																				RNF149	21.6975	22.9024	19.7628	31.6606	33.7305	20.3432	64.6772		P4HTM	1.93089	1.99745	2.38838	1.10137	0.819408	1.46462	1.25231
																				RAMP3	0.580308	0.665201	0.527466	0.616962	1.36263	0.821909	1.55059		C10orf54	2.06986	1.92134	2.57551	1.72785	0.912025	1.63283	0.856611
																				ZNF697	2.29919	2.82261	1.25521	2.87337	4.80078	2.91264	7.37388		MXD4	68.4765	71.6949	88.0104	92.1133	45.4638	81.4352	65.3436
																				TRMT61A	8.37638	9.71128	5.57493	3.46321	13.6059	8.28412	9.82362		TCEA3	9.5133	8.87221	14.0279	14.3996	5.04009	9.0355	8.91692
																				MPHOSPH10	14.5283	14.4466	12.602	10.519	24.7475	15.1597	16.211		NHSL1	10.4434	9.84288	15.0473	5.89643	5.78142	10.3692	2.77427
																				PLAT	17.8379	19.3641	24.0652	30.8915	33.0971	20.2859	105.889		RUNX1T1	3.86102	3.26298	6.29707	4.24875	2.22335	3.99534	1.5312
																				RAB11FIP1	0.826306	0.884763	0.759549	1.27868	1.43646	0.882042	2.29812		RBM5	39.1326	41.647	69.013	61.7412	23.9682	43.1251	42.3517
																				CTGF	694.523	823.164	142.774	616.282	1486.41	914.306	1052.61		KCTD8	1.96189	1.66611	2.50463	1.11699	0.661843	1.19456	0.198539
																				SNX9	53.3575	59.4695	47.5585	44.489	90.1205	55.611	98.424		KDM5C	28.912	27.2212	26.8799	23.455	15.4638	27.9267	22.7475
																				LITAF	36.6109	38.651	20.396	27.2994	62.6815	38.7325	44.7451		SNAPC5	17.518	16.9875	20.1027	18.5157	8.92854	16.1775	16.9589
																				NDUFAF4	5.06412	5.71956	4.10813	2.59505	8.09648	5.01338	3.88198		NCKIPSD	6.44793	6.63054	7.85894	5.97402	3.78332	6.8978	6.25474
																				PTGS2	18.2409	21.0186	14.6571	14.9264	148.624	92.2737	184.282		SEMA6C	3.18996	3.07345	5.15281	5.62916	1.89719	3.45977	3.50397
																				TNFSF11	3.2143	2.69737	1.98575	3.5176	8.28672	5.16589	9.28592		SMAD6	6.50723	7.12078	7.47287	6.63719	2.65939	4.85949	3.47706
																				PCGF5	13.0543	14.0107	8.48424	13.4643	20.5701	12.8365	16.0343		NHS	2.3066	1.93697	1.67212	2.52784	1.18462	2.16602	1.99092
																				HK2	6.79556	6.50681	3.79333	1.99743	11.5552	7.24776	6.67846		HEXA	90.7497	91.2324	85.926	115.756	55.663	101.854	111.241
																				FGD3	13.0851	14.8639	9.06397	5.99634	23.6899	14.9022	11.5373		FAM3A	20.795	20.2197	19.9536	20.2497	11.4939	21.0536	19.1874
																				MFSD2A	4.20876	4.67205	0.896063	0.351344	6.999	4.41803	0.693414		DZIP1L	16.2127	17.6105	17.7839	12.5486	9.87324	18.113	8.39876
																				SMIM3	16.079	16.0207	9.641	9.51668	36.9034	23.3614	40.2348		HEMK1	3.91634	3.32896	6.04089	5.89843	1.87939	3.45384	3.42266
																				PLA2G4A	22.0607	23.2268	16.9565	20.2429	44.55	28.4125	45.2218		MAGED1	264.217	264.623	312.713	249.888	161.402	297.398	246.486
																				LYAR	17.2669	16.9408	12.7931	14.2821	27.8431	17.8603	22.8905		DENND4A	8.96507	7.8328	12.8911	10.1139	4.17805	7.72976	5.47485
																				CYR61	336.407	367.294	159.765	403.921	590.928	379.993	555.374		FOXO4	9.76947	9.91141	11.4754	13.4926	5.77136	10.7224	12.3721
																				CTTNBP2NL	21.7709	20.0932	15.5171	27.6524	44.5348	28.6784	68.2964		SLC16A12	0.389402	0.227568	0.803219	0.350015	0.146046	0.271453	0.179334
																				SEMA4B	3.39121	3.63389	3.19132	3.16379	5.85571	3.78018	7.35439		GRIPAP1	12.4093	11.4301	16.061	12.8214	7.55057	14.1091	13.0524
																				IL17RA	5.29691	5.50372	4.80111	7.11822	8.79279	5.68306	10.9318		Ptprv	2.95954	2.95712	6.65907	3.36686	1.7422	3.25956	2.91863
																				TGFB1	14.6286	15.6398	8.43923	14.3496	22.6047	14.6742	37.0239		NEIL1	3.62577	3.14068	5.93941	4.17518	1.67616	3.15302	2.48289
																				SH3RF1	3.9814	4.36245	2.73188	5.33342	7.30055	4.75053	10.5049		FAM127A	15.2339	14.9791	14.9153	12.9732	7.93161	14.983	13.4149
																				IL1RAP	9.186	9.23095	8.35151	10.2709	13.7642	8.96142	14.4153		ABCD1	8.04026	8.092	7.57536	7.79196	3.65029	6.90569	5.69225
																				SGMS2	6.68604	7.06615	4.73559	8.25875	15.7788	10.3106	25.8671		EMD	83.2561	86.6911	68.2025	65.9891	51.2639	97.1971	54.4817
																				PWWP2B	8.30603	8.97015	6.04123	6.5111	16.4252	10.7539	15.0596		ARMCX6	6.71457	6.44393	8.98376	6.86364	2.32129	4.4289	3.92894
																				WDR43	24.5722	23.9556	18.5678	15.4554	40.8762	26.8048	29.9513		ELK1	15.3039	16.0078	15.3822	12.9267	9.23921	17.6553	12.5305
																				NAF1	5.30939	5.41093	5.89192	3.9325	9.45994	6.20697	8.00891		IGDCC4	31.4843	29.1868	40.0261	30.4814	15.3099	29.2979	25.0401
																				CDK18	6.17408	6.39065	4.83683	4.62546	12.3023	8.09909	13.5613		IP6K1	25.7969	26.3411	34.1396	45.0722	14.9899	28.7566	33.6554
																				ALDH1A3	0.892694	0.924003	0.549255	0.494233	3.30552	2.17988	2.24466		GPR173	1.6823	1.65634	2.37088	1.97111	0.771978	1.49113	1.41557
																				SDC4	24.6977	25.5387	27.0082	37.8191	74.1766	49.0579	183.75		GRIN3A	0.458485	0.330196	0.992455	0.532857	0.186847	0.366478	0.193075
																				NXPH3	0.104123	0.10964	0.117255	0.165304	0.53742	0.357113	4.67073		AASS	4.13844	3.6081	5.32998	3.35227	2.24862	4.42232	2.26516
																				QTRTD1	5.91202	5.92492	6.151	4.43663	10.4886	6.97093	8.29346		MXD1	4.31762	4.25474	6.5963	7.62682	2.59504	5.10924	4.31058
																				OTUD4	12.7444	12.8968	13.8678	13.7677	21.9383	14.6297	21.1497		SERPINB9	12.1646	11.7654	10.4249	5.25571	7.64614	15.0694	3.43302
																				URB1	2.47241	2.36336	2.85191	2.05861	4.26974	2.85423	3.91646		GPR156	0.745873	0.585717	1.42214	0.489075	0.268945	0.534299	0.335927
																				LRRC8D	16.7549	17.3914	14.0426	12.2067	27.2357	18.3408	20.6872		Nrbp2	21.9613	21.2177	47.3465	30.6861	13.47	26.7916	17.2663
																				FBXO28	11.9959	12.4386	10.7574	13.9432	19.0067	12.8049	23.703		BCORL1	4.22517	4.00722	4.35874	4.6401	2.07404	4.19662	4.97552
																				CTDP1	10.6426	11.2381	7.59433	9.69106	18.1467	12.2738	19.8008		ADAMTS1	112.082	99.0952	108.718	20.9304	57.9668	117.992	10.6293
																				PPAN	19.9797	22.2035	16.3492	10.7332	33.1455	22.474	24.6885		ZFR2	1.61632	1.41513	3.2836	4.53509	0.689116	1.40632	2.08705
																				PPM1J	0.793206	0.977715	1.39878	1.16318	1.92752	1.30698	6.86349		WDR45	16.7339	17.8152	20.0671	34.9116	10.2038	20.8732	35.9334
																				FHL2	69.5585	73.048	49.8613	48.6006	108.872	74.1441	72.8184		SMAD9	0.528491	0.611155	0.81892	0.337882	0.212234	0.435094	0.145105
																				URB2	6.62346	6.58012	5.23451	5.18579	10.8504	7.44526	9.79558		IP6K2	20.4427	20.9007	36.077	27.5566	10.5053	21.6429	20.7716
																				CRCT1	0.274188	0.489928	0.113993	0	1.68707	1.16218	0.372364		GNAZ	1.33336	1.15446	1.23633	0.61251	0.61597	1.27275	0.576437
																				CCDC86	12.4594	13.2721	9.75523	6.33342	19.6425	13.6278	11.4061		MON1A	4.99087	5.27602	4.51283	4.63323	2.56772	5.33922	2.70619
																				BDNF	19.9175	21.1718	13.7929	18.9205	31.2769	21.7313	27.0072		TCEAL5	2.80262	2.75865	4.13928	1.77014	1.13228	2.36066	1.79077
																				CHKA	7.43276	8.64743	8.89924	8.06177	12.4981	8.70462	13.0209		EGFL6	13.6486	9.40365	20.6523	24.2069	7.4365	15.5373	24.6693
																				ANO1	9.08771	10.4684	6.55013	4.10526	19.3383	13.4748	8.92098		GPRIN2	0.636517	0.473868	0.62444	0.703117	0.174134	0.364899	0.495169
																				MCL1	62.5372	65.1	41.827	74.7071	94.3622	66.1852	114.637		FIGN	0.395888	0.388923	1.06879	0.356882	0.164372	0.345298	0.16024
																				IER5	25.0777	28.3134	17.16	18.7014	40.9262	28.7477	35.4155		ADRA2A	5.29309	4.10638	5.06252	3.12584	2.29873	4.85429	1.40162
																				PTPN1	11.5021	11.9814	10.419	11.4655	17.897	12.5841	25.6887		FAM50A	35.1905	34.8601	36.4388	28.7416	19.0587	40.2755	26.6345
																				NOP58	49.5689	47.6065	34.9989	26.2917	76.9252	54.2591	51.8561		PYGO1	6.01607	6.31063	7.80982	6.08024	3.1398	6.64587	4.20198
																				FOXG1	5.12184	5.52196	4.59208	7.11854	9.78475	6.91801	13.2838		PIAS1	10.9809	10.9135	16.8208	16.9541	6.07244	12.883	11.4657
																				SLC16A1	8.37253	8.77775	6.46399	4.48638	14.61	10.3555	10.5635		KLHL13	76.055	75.093	95.2231	70.7479	40.0508	85.1498	53.6747
																				BCAR3	2.60271	3.08619	3.35302	1.49137	5.96835	4.24805	4.61323		PRAF2	48.967	49.3649	54.5404	55.2479	28.6338	61.0929	51.0947
																				ADAM19	33.2458	33.4686	24.8014	22.7281	48.9742	34.9895	50.7724		FREM1	0.831541	0.488425	1.4426	1.28685	0.465704	1.00338	1.28816
																				TSR1	23.6903	24.8957	20.7297	14.55	39.7822	28.4841	30.7572		IGSF10	15.2058	10.7223	17.6978	16.6687	8.53992	18.4249	13.705
																				IL7	1.07252	1.26996	1.71792	0.686861	1.96779	1.40961	0.511033		ZC2HC1C	1.02772	1.03318	2.76303	0.908799	0.496419	1.07359	0.395083
																				BDKRB2	0.846077	0.942443	1.21028	0.307157	3.0881	2.21815	4.51604		MYD88	16.0548	15.1835	16.0466	11.8634	9.11352	19.9226	10.6001
																				SOWAHC	3.4155	3.18295	3.24299	4.52624	5.45989	3.93417	7.78796		ACSS3	1.82183	1.10611	4.04225	2.33554	0.833577	1.83292	1.43914
																				PARD6B	1.96938	2.50501	3.93011	1.55614	6.03469	4.37845	4.70511		ARMCX4	10.3927	9.35543	12.1266	4.82313	5.07666	11.1902	4.40799
																				CD44	72.9974	80.6792	32.9138	68.0424	201.647	148.461	236.867		FGF18	15.7383	15.7007	23.9969	28.0872	3.36721	7.47165	4.69608
																				SHB	11.1063	13.5747	9.71443	9.95311	19.4531	14.4216	16.6387		ID2	16.8959	17.8456	24.9518	9.75959	8.01157	18.1469	4.27987
																				EAF1	16.89	16.2699	13.4289	15.8346	26.1305	19.3744	26.1506		PGRMC1	187.829	197.777	226.156	214.858	117.203	266.74	195.918
																				CIRH1A	22.2446	21.6186	17.4817	17.4474	34.3084	25.6348	27.5578		TCTA	26.7948	26.2298	33.1007	40.9779	12.8284	29.2089	22.8858
																				NFE2L2	38.1288	36.8229	42.4038	43.7192	61.2304	45.8605	97.2058		NAPRT1	1.71114	1.22015	4.02287	1.82169	0.787484	1.80506	1.19238
																				ATP8B1	0.560864	0.434702	0.372683	0.235895	1.13379	0.850036	0.717047		ABHD5	18.5187	17.1456	21.2877	16.3661	10.8605	24.9544	15.8792
																				FPGT	4.74045	5.63258	5.84032	5.48008	7.54818	5.71004	6.53527		PRICKLE1	8.88566	9.2537	10.6645	6.65887	5.17928	12.0173	4.69479
																				TRIM8	17.2055	19.2935	13.6259	17.5352	26.6806	20.222	36.2077		SHOX2	19.1991	17.4933	29.8298	32.1626	12.0063	27.8896	19.5142
																				KIF2A	16.6897	15.6477	15.4662	22.7767	25.2708	19.1698	36.8895		FAT4	10.2178	8.14069	16.8661	13.179	5.49905	12.7802	8.2574
																				KITLG	2.16872	2.01045	2.31565	2.83456	3.49025	2.64833	6.0893		MAOB	3.02159	2.26721	4.57863	2.91337	1.51985	3.53232	2.55703
																				GTPBP4	30.0122	28.5614	25.2441	23.6932	45.9369	34.8614	42.0121		NKD1	4.02731	3.55432	7.04602	1.63715	1.72198	4.00686	1.12266
																				TPD52	7.50051	8.19542	7.08797	7.15418	11.7771	9.02816	9.60155		FAM127C	11.5407	12.6056	10.8109	8.86743	6.35372	14.9327	9.12288
																				PTPN12	19.8729	20.8735	17.5116	23.5241	33.6301	25.8311	40.5049		MRAS	22.6549	22.9962	22.6218	20.1262	11.4842	27.0059	17.9683
																				NIPAL1	0.348818	0.382512	0.319757	0.815607	3.14088	2.41388	8.30981		STAC	0.741639	0.735346	1.4148	0.305028	0.28408	0.672012	0.149337
																				KATNBL1	8.96427	8.53665	9.47357	9.83162	13.8754	10.6721	11.9556		CLMN	1.14644	1.18017	1.64468	1.49885	0.668207	1.59533	0.782108
																				TIMM10	18.9395	21.3722	14.2722	12.1879	31.2502	24.0545	23.0111		ATG16L2	7.4935	7.77438	24.3392	10.0664	4.48955	10.7749	4.5625
																				Nppb	2.8512	4.31507	3.14029	3.85769	32.829	25.2727	46.3826		AFF3	6.12915	5.23091	14.1741	6.34234	3.10654	7.47477	3.45864
																				IPO7	58.9902	59.3614	57.1056	68.2236	98.3366	75.8333	102.959		KLF11	3.1301	2.53998	3.93921	6.72463	1.73636	4.1914	3.22286
																				ELAVL2	1.78069	1.87517	3.63662	1.59157	3.115	2.40256	1.81437		AMOTL2	132.778	146.985	168.229	213.504	79.9592	193.376	163.424
																				EEF1E1	34.3976	38.2608	29.5828	22.5235	55.1029	42.7644	35.4674		OSR1	53.7319	51.9255	107.757	36.1768	31.7721	76.9248	24.0688
																				ST3GAL6	12.3011	13.373	13.92	14.823	19.4879	15.1326	18.209		CREBL2	4.20452	3.89065	6.88166	9.12606	2.36006	5.75172	5.20457
																				IKZF2	1.22647	1.31736	1.70537	1.71372	2.0464	1.60236	1.68544		CUL9	1.71155	1.48304	3.65303	3.9897	0.905366	2.23866	2.91803
																				RGS17	7.01832	7.71357	9.78169	7.46592	14.2211	11.1462	19.4442		LAMB2	60.6969	61.1417	83.5449	94.851	32.9678	81.9029	84.671
																				ARF6	32.8652	36.1184	26.7949	29.7434	55.3262	43.3641	64.7864		SNX33	11.6368	11.0274	11.8478	15.1593	6.83978	17.0598	12.8632
																				FOXN2	6.85873	6.41303	6.02735	5.67352	11.317	8.9046	10.1876		CNNM2	9.37156	9.44426	12.2821	9.99344	5.7131	14.2776	5.22134
																				TOMM70A	39.6714	39.8376	34.6707	33.6129	58.7377	46.4702	52.0248		MTSS1L	29.843	30.0831	32.7419	29.2995	17.9619	44.9139	18.1366
																				EIF1AX	87.8352	92.9186	60.7255	64.1332	139.639	110.596	107.863		GDI1	62.1695	63.6311	109.616	78.934	35.2943	88.4756	65.5925
																				FAM129B	110.829	126.995	92.329	85.8008	180.919	143.744	262.006		Plekha6	0.787053	0.600746	0.970609	0.484953	0.368248	0.941175	0.160551
																				NOL8	6.60354	6.45481	7.2424	7.14897	10.5846	8.41997	10.7118		Acaa1b	1.65475	1.28315	3.31302	1.50928	0.453319	1.17989	1.56663
																				SLC25A32	4.87496	4.97633	6.95282	5.57492	8.1205	6.4668	7.64926		TSPYL2	19.647	21.1863	42.6209	18.358	10.5999	27.8193	13.353
																				MAP2K3	59.1827	64.9628	49.4575	46.6144	99.5421	79.3577	105.259		PRSS35	37.8365	32.4502	67.6363	72.7466	19.3405	51.1146	53.2917
																				MAT2A	67.9057	71.4336	74.2243	44.1141	109.109	87.01	95.5347		Zfp651	14.2941	15.5412	18.1335	16.3942	7.5379	19.9861	11.897
																				ESF1	11.7962	11.2741	10.6964	9.43912	17.6374	14.0925	16.8715		POU3F4	7.72739	7.12589	7.8912	6.27721	3.20477	8.50431	2.93689
																				MICAL2	37.4179	40.9856	32.3887	33.1502	74.9862	59.9689	110.711		FIGF	12.0168	11.2683	25.8447	17.2572	5.46347	14.5598	12.9234
																				CAMK1D	1.35734	1.39145	1.39152	0.871298	2.52801	2.02193	2.75294		GUCY1A3	1.44827	0.896975	2.03415	1.47874	0.50443	1.34621	0.625943
																				PLK2	61.4371	64.0625	52.5781	53.3883	100.784	80.9682	71.9428		WISP2	38.8667	38.9189	68.9765	22.7775	21.8619	59.0145	14.6635
																				TJP2	10.2414	10.9226	6.23907	6.6639	17.2605	13.8746	19.2153		KCNE4	1.73181	1.57234	2.80426	0.911586	0.572938	1.55767	0.4168
																				ROCK2	66.7807	68.2189	49.4253	99.5121	108.016	87.2382	144.753		MEF2C	5.6774	5.03969	5.42842	4.89345	1.90054	5.32637	1.13057
																				MICALCL	0.464557	0.591797	0.493546	0.561964	1.01593	0.822228	1.75987		KLHL18	8.28729	8.65063	8.98079	7.42095	4.98237	14.2029	7.97242
																				SOCS6	10.5873	10.3754	9.21426	11.3052	16.8779	13.6824	19.8969		PRRG3	8.53541	7.92655	13.5283	8.36457	5.0824	14.6762	8.07548
																				GNB4	6.76973	7.99613	7.62318	9.22528	10.6098	8.65342	11.2742		Gsta4	15.8906	14.4911	22.538	15.2153	7.93717	23.4177	12.0073
																				ST3GAL1	5.77261	5.67833	6.85448	6.71536	11.8073	9.75446	18.6695		RIMS2	0.469722	0.39301	1.09593	0.35741	0.173547	0.530137	0.427386
																				PRKCA	7.47702	8.60011	7.5805	8.91615	13.8955	11.4931	17.7889		BBOX1	0.531199	0.525597	0.369286	0.193284	0.157123	0.498249	0.198892
																				PLEC	46.1775	46.1926	37.995	50.7198	77.3213	63.979	140.938		BMP3	6.36653	5.92542	13.5716	2.3895	2.25464	7.19912	1.06645
																				OTUD7A	0.152624	0.168766	0.171005	0.42858	0.398352	0.329755	1.90508		SYNPO2	2.64165	2.3263	4.67943	2.54254	1.47285	4.95207	1.34842
																				ITGA6	5.40377	5.60569	5.33581	4.50496	10.2418	8.55722	12.8656		Nacad	6.3789	6.05981	7.81505	2.97859	3.75651	13.3166	1.78807
																				SLC2A1	42.5734	43.5634	31.8902	19.6317	65.2576	54.6612	43.4361		PTCHD1	1.19467	0.949195	4.70746	1.43727	0.641928	2.27892	1.12942
																				LARP4	10.2783	10.222	10.8306	8.90627	16.2298	13.5966	14.7638		RIN2	8.44745	8.10932	14.0091	12.7153	4.63626	16.7645	7.54833
																				HIVEP2	3.00965	2.57422	4.48298	3.53251	5.50968	4.62234	10.2748		DACT1	16.736	15.6003	31.2163	12.7791	7.21817	26.7044	3.99467
																				KLF13	11.4384	10.838	9.04252	14.4829	19.7387	16.5643	31.7596		MAFB	1.35679	1.14227	3.98788	1.95266	0.688807	2.55351	0.885143
																				TRIM16	18.2795	18.9889	11.0956	10.1278	35.1336	29.818	26.4584		L1CAM	1.0563	1.00843	1.16063	0.927193	0.420657	1.55995	0.812281
																				PTGS1	7.28312	6.71027	7.91928	8.14538	12.5634	10.6699	15.5083		GRB14	3.69315	2.64322	9.78593	6.07876	1.8105	6.72584	2.49816
																				ADAM12	4.76178	4.49067	3.62354	5.68729	8.14855	6.95413	14.1291		MAP7D3	0.510711	0.41568	0.825495	0.286391	0.192356	0.790792	0.399211
																				LRRFIP1	82.1276	88.6683	71.2227	50.1273	133.636	114.878	106.328		ABCA1	6.0004	4.54106	17.95	17.5553	2.42169	10.136	11.1793
																				ETS1	12.859	13.6731	9.60552	9.58815	19.1845	16.5621	18.5427		RASL11B	32.7968	34.2859	53.4433	45.3007	12.0723	52.1043	12.1785
																				B3GNT2	9.27715	8.674	7.8363	9.92316	14.3879	12.6232	19.9981		PTGFR	1.20678	0.929854	2.57642	1.27033	0.596732	2.58338	0.557702
																				ABL2	7.96924	7.31132	6.33385	5.5166	13.3618	11.7878	15.5701		MTSS1	8.42328	8.7748	21.45	15.1658	5.19641	23.2956	8.28604
																				SOAT1	12.4859	12.5193	11.1402	12.3435	19.6364	17.3726	20.9023		ARSI	3.39795	2.88884	9.28067	2.35838	1.71581	7.81515	1.57389
																				SERPINE1	161.034	209.294	76.474	77.9319	632.715	561.293	576.791		CDC42EP2	11.1528	11.0422	16.0118	9.96949	6.20831	33.8761	7.48328
																				TAGLN2	168.499	179.67	115.434	73.1747	261.086	231.956	169.273		WNT16	32.6352	32.605	91.5674	33.0349	17.1147	105.393	17.2692
																				SRSF2	72.885	86.4507	82.5437	44.7042	105.908	94.8086	47.3052		DHRS3	7.82156	8.16548	26.3973	6.79431	1.71379	12.7134	1.59481
																				TUBA1C	12.3315	13.245	8.51622	3.48959	20.835	18.678	14.8427		RSPO2	20.5963	18.9101	97.0068	13.028	8.46849	69.4949	5.02521
																				CDK17	11.795	12.2126	14.1331	11.5115	19.6781	17.7223	21.9888		C11orf87	1.49048	1.20583	2.87194	1.25949	0.438122	3.68339	0.774505
																				PDGFB	3.60124	4.50279	2.88664	1.16903	6.63983	5.9836	3.91333		ARTN	1.58071	1.79942	11.1899	0.889268	0.756457	9.22965	0.350107
																				SMURF2	25.2116	25.6136	26.6665	38.1255	43.0888	39.0088	53.2632		ADAMTS15	1.45625	0.822651	1.93166	0.337506	0.214322	2.6674	0.0491685
																				DKK2	24.7314	26.2009	28.6081	13.6814	46.223	42.3013	20.3164
																				SFN	31.6893	40.6931	24.5773	8.78959	64.7525	59.3201	26.3695
																				SMIM15	71.671	77.7524	70.593	66.6438	122.248	112.447	95.2736
																				TXNRD1	71.7375	73.9125	65.3763	52.8672	106.648	98.2245	185.234
																				PLAUR	22.5365	24.7691	13.7723	5.22143	74.77	70.085	74.5628
																				COQ10B	31.2248	32.7283	32.3356	36.3943	46.2991	43.4606	47.678
																				CCNYL1	9.07654	9.77761	8.04071	7.95017	15.2007	14.2742	16.0904
																				PTBP3	12.5687	12.7498	13.9815	17.165	18.7817	17.6538	24.6027
																				EXT1	46.7597	49.7565	40.1523	60.635	73.5133	69.1646	107.996
																				TNFRSF12A	150.631	167.736	77.4178	113.259	348.078	332.651	431.763
																				LFNG	2.20552	2.14439	2.62233	1.26324	4.21842	4.04258	4.37413
																				MMP13	0.345408	0.24846	0.278396	0.902506	1.07829	1.036	1.48508
																				KCNK3	0.0510674	0.104227	0.138469	0.129555	0.417162	0.401927	0.935598
																				IL11	0.955729	1.45135	1.40246	1.79892	3.78009	3.68154	11.9347
																				SYNE3	2.961	2.87618	2.36337	3.85105	5.09083	4.97859	10.8413
																				TBC1D1	10.4387	10.5256	10.0178	7.85693	16.2475	16.0425	16.3477
																				EEA1	8.41224	7.61395	10.9546	11.3488	13.607	13.5754	20.7679
																				RIN1	21.9186	23.3687	20.1705	17.5519	38.9699	38.9411	47.2871
																				SLC20A1	62.0771	65.6714	83.2436	41.4208	111.841	112.637	100.364
																				HECTD2	1.2167	1.52315	1.71941	1.65571	3.00684	3.03595	4.1743
																				OTUD1	4.83626	5.10256	3.12703	7.69763	7.91796	7.9988	7.75647
																				CEBPB	12.7979	17.3156	11.4562	16.7613	21.8424	22.1777	23.0952
																				FAR1	31.3373	34.7762	39.4426	31.4251	46.953	47.6961	45.76
																				ARHGAP22	3.91119	4.53806	4.02936	1.35085	7.85525	8.03405	4.81994
																				PHLDB1	29.2518	32.0739	33.6367	28.1256	43.9687	45.7877	54.7173
																				KCNAB3	0.596701	0.916856	1.92266	0.553488	1.45566	1.52012	0.954005
																				B4GALT5	8.43275	9.00341	8.74207	7.67437	13.1752	13.7604	17.2482
																				ATP1B1	34.4472	40.2062	35.8231	29.6689	64.5787	67.8092	54.8482
																				SGMS1	28.3441	29.5384	20.5951	29.1949	41.9424	44.2439	43.8928
																				TSKU	19.0574	21.1097	18.7887	20.3416	34.9927	36.9353	34.3167
																				LRRC32	2.80729	3.25812	2.06337	1.58818	7.50038	8.11833	5.40077
																				NT5DC3	8.78475	8.73821	8.51992	8.7613	13.6243	14.8174	18.6534
																				ZAK	33.1156	33.4387	37.2879	32.7352	49.4349	53.7749	55.6048
																				Pvr	17.7489	19.1596	16.8311	16.2533	37.3279	40.7738	36.3595
																				IER3	25.4613	29.0703	29.6485	51.6716	63.5803	70.3974	100.71
																				EHD4	17.1652	18.6019	16.2373	16.7553	29.513	32.6954	39.1864
																				RRAS2	28.6876	29.8857	23.5324	28.3341	54.087	59.9259	51.6945
																				BAZ1A	4.26799	4.44698	4.71232	3.00398	6.6565	7.38603	5.00396
																				GCH1	0.574065	0.780565	0.548932	0.962155	1.46074	1.62823	2.28954
																				SLC30A4	21.2703	21.0485	21.7907	24.3114	36.4994	40.7832	44.4009
																				IL1RL1	9.5315	10.8632	12.2014	5.44202	42.5128	48.1427	53.4705
																				ARID5A	2.46437	2.31636	2.26548	3.69293	5.08187	5.86167	9.02974
																				IFRD1	60.4073	60.9577	61.3574	72.7176	95.382	111.312	90.8085
																				GPR149	0.264753	0.346985	0.232928	0.222871	0.568223	0.676139	0.179907
																				UGDH	25.6831	29.5078	36.3137	30.9024	44.999	53.8094	85.9057
																				NGF	25.0207	26.2578	31.3963	14.8777	48.2529	58.3368	27.6219
																				MFAP3L	1.17187	1.29828	2.59501	1.86049	2.01074	2.43478	2.5055
																				SRXN1	19.9693	20.6918	28.0525	15.609	37.4158	45.4373	103.352
																				NFATC2	0.475347	0.538326	0.386471	0.152725	0.880186	1.08384	0.508744
																				Ifitm10	0.215246	0.318597	0.333167	0.289383	0.586668	0.728632	1.26313
																				SLCO4A1	0.183067	0.164332	0.298215	0.350173	0.491664	0.612873	1.47824
																				HIP1R	2.6384	3.05042	3.30592	3.5547	4.51652	5.65513	8.10878
																				CLDN4	0.121466	0.239214	0.0358921	0.060307	0.792141	1.03119	0.0586991
																				SLC41A2	10.0776	11.1879	9.70334	8.91994	15.2215	20.5787	15.9794
																				FAM167A	0.340452	0.316815	0.225835	0.270342	0.902043	1.24042	1.02526
																				NFKBIZ	1.9374	1.90953	4.90609	4.1229	3.36419	4.81443	5.89353
																				UGCG	33.033	35.5517	46.5189	35.2286	62.9653	90.3214	58.1442
																				PLAU	40.546	45.2724	24.9172	16.8219	76.4603	109.744	38.5591
																				GFOD1	3.2236	3.08989	2.8729	2.20634	5.52297	7.93574	4.23645
																				ZNF703	25.6171	28.1731	37.9905	23.3302	38.1478	55.5184	42.6086
																				KLF6	46.6268	48.3173	59.1188	47.0978	69.9836	102.105	54.6387
																				UHRF1BP1L	12.8069	13.9329	18.0291	15.4083	19.0213	27.829	23.0195
																				NGEF	0.259047	0.327432	0.550692	0.0612097	0.876583	1.35113	1.47714
																				JUN	30.8793	33.3039	55.758	35.2553	77.9873	124.263	137.438
																				DUSP1	30.0065	35.6205	19.7844	46.7514	56.883	90.9793	80.8119
																				SLC35E4	15.3477	17.3343	15.3062	13.7655	22.9366	36.7763	24.4206
																				RAB23	22.2315	22.8711	22.9119	24.1972	33.1548	54.9809	36.253
																				TIPARP	7.59595	7.24978	18.436	13.7323	12.7599	21.1702	20.4081
																				NABP1	8.94918	8.98289	25.0332	10.9076	14.4131	24.3706	12.4367
																				BRINP1	1.04814	0.830607	1.82994	1.54007	2.03727	3.87916	8.59408
																				WNT7A	0.294954	0.391366	0.527601	0.0723454	0.858717	1.86244	0.0843619
																				MCF2L	0.777101	0.994727	1.74927	0.146107	1.56429	3.58361	0.607754
																				DUSP10	4.39922	4.53874	8.65253	3.69016	9.09153	23.7747	10.7005
																				LRRN4CL	4.92047	4.36382	6.06117	2.7188	8.41204	22.1142	7.57766
																				RCAN1	20.8793	20.1043	22.7318	36.4382	47.8613	130.942	126.021
																				GCNT1	0.691876	0.69601	2.46317	0.613431	1.78579	5.42683	4.00504
																				MYLK2	0.144354	0.112502	0.250595	0.148829	0.524433	1.9317	1.01674
																				AQP5	0.856605	0.899242	8.28276	2.24219	2.17262	12.1813	4.08961
