# Supplementary material for: Receptor tyrosine kinases modulate distinct transcriptional programs by differential usage of intracellular pathways
Source: eLife. 2015 May 7;4:e07186. doi: 10.7554/eLife.07186 (PMC4450512; doi:10.7554/eLife.07186)
Supplement: Supplementary file 3. — Inhibitor dependence for RTK target genes. DOI: http://dx.doi.org/10.7554/eLife.07186.016 [file elife07186s003.xlsx]

## Sheet: 1hr
Gene	PDGF PD: p-value	log2 FC (PDGF + PD)		Gene	PDGF LY: p-value	log2 FC (PDGF + LY)		Gene	FGF PD: p-value	log2 FC (FGF + PD)		Gene	FGF LY: p-value	log2 FGF + LY			PDGF, PD down	p-value		PDGF, PD up	p-value		PDGF, LY down	p-value		PDGF, LY up	p-value		FGF, PD down	p-value		FGF, PD up	p-value		FGF, LY down	p-value		FGF, LY up	p-value
SPRY4	0.00113443	-4.54211		EGR4	0.0840548	-2.65917		EGR2	0.0644208	-6.33105		MYCN	0.0306615	-2.42107			SPRY4	0.00113443		FOSL2	0.00265957		BHLHE40	0.00542521		SDC4	0.000953248		GCNT2	0.000211577		JUN	0.0224989		SPRY4	0.00217556		HIST1H1D	0.00100829
EGR1	0.12012	-4.47553		ANKRD1	0.0492288	-2.3121		EGR1	0.0610801	-6.24217		ANKRD1	0.0313687	-1.91048			ZFP36L2	0.00145334		PPP1R15A	0.0119359		SLC25A25	0.00767333		HIST1H1D	0.00913801		EREG	0.000230348		FOSL2	0.0255002		GCNT2	0.00289036		PIM1	0.00239556
EGR4	0.0648786	-4.2791		Nppb	0.0318941	-2.0873		EGR3	0.0683837	-5.74024		F2RL1	0.0383674	-1.7789			DUSP6	0.00323225		ATF3	0.0163256		SRF	0.00851047		ZSWIM4	0.0117549		SPRY4	0.000332458		KLF6	0.0316393		Klf16	0.0094915		DUSP6	0.00266391
EGR2	0.099284	-3.88885		TNFSF18	0.0831175	-1.84058		MYCN	0.0160064	-5		KLHDC8A	0.0197862	-1.32431			MYC	0.0035127		NFIL3	0.0165108		F3	0.0117997		NR4A3	0.0193509		DUSP6	0.000838175		SLC25A25	0.055678		IER5L	0.0155779		VASN	0.00659669
DUSP6	0.00323225	-3.85649		MYC	0.0274649	-1.83071		EGR4	0.10146	-5		PLAU	0.0396478	-1.20026			PLK3	0.00358099		JUN	0.022345		Klf16	0.0126641		SKIL	0.0375226		ZFP36L2	0.00167541					KLHDC8A	0.0197862		IER3	0.00906695
FOS	0.120543	-2.94741		F2RL1	0.0452033	-1.75675		ARC	0.0628274	-4.75446		INSIG1	0.272991	-1.12494			BHLHE40	0.00591094		GEM	0.024581		KLHDC8A	0.0165128		VASN	0.0508869		HES1	0.00560421					PARD6B	0.0223388		OTUD1	0.00906866
EGR3	0.0480983	-2.92127		SRF	0.00851047	-1.58806		DUSP6	0.000838175	-3.86647		IER5L	0.0155779	-1.07085			SPRY2	0.00955315		NR4A3	0.0314479		KCTD11	0.0182227		C3orf52	0.0644132		KCTD11	0.00580986					ZC3H12A	0.026576		EGR1	0.0100293
PHLDA1	0.0173566	-2.80212		RGS16	0.0716656	-1.56763		SPRY4	0.000332458	-3.34214		SRF	0.071457	-0.9779			CTGF	0.011178		CSRNP1	0.0377024		SPRY4	0.0188018		ARID3B	0.0811092		DUSP4	0.00611292					BHLHE40	0.0266441		MYC	0.0112027
MYC	0.0035127	-2.50524		MYCN	0.166539	-1.52805		ZFP36L2	0.00167541	-2.59315		PARD6B	0.0223388	-0.971596			EPHA2	0.0123822					FHL3	0.0209706		EGR3	0.0895968		HBEGF	0.00626983					SLC25A25	0.0279196		KLF9	0.0121452
NUAK2	N/A	-2.33879		INSIG1	0.140749	-1.51031		NUAK2	0.222087	-2.3601		SLC25A25	0.0279196	-0.907355			HES1	0.0163773					MYC	0.0274649					IER5L	0.00755918					MYCN	0.0306615		ARID5A	0.0220091
MYCN	0.144691	-2.31158		SERPINE1	0.0345144	-1.50595		DUSP5	0.0326814	-2.21289		PLOD3	0.228215	-0.873398			PHLDA1	0.0173566					IER5	0.0292682					KLHDC8A	0.00901509					ANKRD1	0.0313687		ZFP36	0.0264783
SPRY2	0.00955315	-2.2698		FOSL1	0.177905	-1.44236		KLHDC8A	0.00901509	-2.12126		EGR4	0.417396	-0.82093			SLC25A25	0.0178591					Nppb	0.0318941					ARID3B	0.0118492					KCTD11	0.0364439		IER2	0.0335662
PLK3	0.00358099	-2.17098		PLAUR	0.104121	-1.30321		DUSP4	0.00611292	-2.08466		TNFSF18	0.195678	-0.738231			KLHDC8A	0.0236439					SLC2A1	0.0327866					HOMER1	0.0130009					ARL4C	0.0365339		BTG2	0.0339883
ARC	0.141163	-2.13497		BHLHE40	0.00542521	-1.29596		PHLDA1	0.0215781	-1.98487		PLAUR	0.134209	-0.737717			ARL4C	0.0375447					ARL4C	0.034481					ERRFI1	0.0141878					F2RL1	0.0383674		FOS	0.0390122
ZFP36L2	0.00145334	-2.12456		PARD6B	0.0376324	-1.28751		ERRFI1	0.0141878	-1.95518		Klf16	0.0094915	-0.723719			EGR3	0.0480983					SERPINE1	0.0345144					ZSWIM4	0.0147666					PLAU	0.0396478		ARID3B	0.0403857
TNFSF18	0.0797959	-1.96488		PLAU	0.078235	-1.26228		IER2	0.0444297	-1.93972		NUAK2	0.222087	-0.717631			DUSP5	0.0561326					PARD6B	0.0376324					BHLHE40	0.0159683					F3	0.0538293		EGR3	0.0466746
RGS16	0.0663339	-1.70846		KLHDC8A	0.0165128	-1.24889		KLF10	0.0296036	-1.92929		BHLHE40	0.0266441	-0.692596			IER2	0.0579981					MOB3A	0.0447275					MYCN	0.0160064					SLC2A1	0.0590676		NR4A3	0.0476967
KLHDC8A	0.0236439	-1.59097		NUAK2	N/A	-0.997612		SPRY2	0.065491	-1.85636		HES1	0.129937	-0.635421			SMAD7	0.0610988					F2RL1	0.0452033					PHLDA1	0.0215781					SRF	0.071457		NR4A1	0.0485695
BHLHE40	0.00591094	-1.58015		SPRY4	0.0188018	-0.986669		FOSB	0.0364089	-1.8461		ZC3H12A	0.026576	-0.554117			EGR4	0.0648786					ANKRD1	0.0492288					PLK3	0.0237611					MOB3A	0.0777464		TRIB1	0.0542703
DUSP4	0.0733228	-1.53047		GCNT2	0.416048	-0.984637		F2RL1	0.0564226	-1.79999		SPRY4	0.00217556	-0.553946			RGS16	0.0663339					SMAD7	0.0499578					IRF2BP2	0.0244784								JUNB	0.0604984
F2RL1	0.107982	-1.38516		PHLDA1	0.062565	-0.966023		IER5L	0.00755918	-1.76245		GCNT2	0.00289036	-0.551444			DUSP4	0.0733228					EPHA2	0.0518493					SERTAD1	0.0246485								PPP1R15A	0.065319
HIST1H1D	0.896134	-1.35137		F3	0.0117997	-0.922342		BHLHE40	0.0159683	-1.73031		MOB3A	0.0777464	-0.543224			IER5L	0.0749577					ZC3H12A	0.0561466					KLF10	0.0296036								HOMER1	0.0658796
DUSP5	0.0561326	-1.24128		SLC25A25	0.00767333	-0.899893		JUNB	0.0321203	-1.70632		EPHA2	0.199004	-0.511925			MAFF	0.0777651					CCRN4L	0.0592011					JUNB	0.0321203								ATF3	0.0659543
EPHA2	0.0123822	-1.22881		FHL3	0.0209706	-0.849265		HES1	0.00560421	-1.57635		SLC2A1	0.0590676	-0.479922			NAB2	0.0787624					PHLDA1	0.062565					DUSP5	0.0326814								ARC	0.0665536
IER2	0.0579981	-1.19634		CCRN4L	0.0592011	-0.825928		HIST1H1D	0.171916	-1.5705		CTGF	0.275211	-0.464437			TNFSF18	0.0797959					LIF	0.0655277					PIM3	0.0342591								IFRD1	0.0677947
CTGF	0.011178	-1.14647		EPHA2	0.0518493	-0.789407		FOS	0.103642	-1.54981		FHL3	0.312275	-0.449317			LIF	0.0823362					RGS16	0.0716656					F3	0.0350503								C3orf52	0.0762722
ERRFI1	0.105471	-1.12242		KCTD11	0.0182227	-0.773599		KCTD11	0.00580986	-1.53913		CEBPB	N/A	-0.421799			PLOD3	0.08923					PLAU	0.078235					FOSB	0.0364089								JUN	0.0786411
KCTD11	0.127054	-0.847049		CSRNP1	0.0802332	-0.708951		HBEGF	0.00626983	-1.46792		F3	0.0538293	-0.400717			EGR2	0.099284					CSRNP1	0.0802332					SMAD7	0.0396202								DNAJB1	0.0874935
ANKRD1	0.221913	-0.826688		PTGS2	0.276679	-0.703088		NAB2	0.372794	-1.45327		SMAD7	0.212506	-0.346489									TNFSF18	0.0831175					DNAJB1	0.0441162								EGR2	0.0897406
HES1	0.0163773	-0.765642		CTGF	0.0903133	-0.669393		MYC	0.075762	-1.43397		ARL4C	0.0365339	-0.339412									EGR4	0.0840548					IER2	0.0444297								FAM110C	0.0914232
TRIB1	0.126555	-0.755731		SLC2A1	0.0327866	-0.643123		GCNT2	0.000211577	-1.24509		KCTD11	0.0364439	-0.301017									CTGF	0.0903133					MAP3K14	0.0483564								ZSWIM4	0.0921401
MAFF	0.0777651	-0.675259		IER5	0.0292682	-0.626484		TRIB1	0.0510273	-1.18692		STK40	0.221989	-0.266383															TRIB1	0.0510273								IRF2BP2	0.0946354
Nppb	0.640084	-0.674818		Klf16	0.0126641	-0.618318		TGIF1	0.253171	-1.1799		LFNG	0.15853	-0.249671															IRF2BPL	0.0545845								SDC4	0.0990925
C8orf4	0.218607	-0.667443		LIF	0.0655277	-0.616335		MAP3K14	0.0483564	-1.1722		CITED2	0.400842	-0.211828															F2RL1	0.0564226								FOSB	0.0997036
FOSL1	0.335842	-0.612328		TRIB1	0.149911	-0.61341		PLOD3	0.123647	-1.15955		IRF2BPL	0.710864	-0.186053															CCRN4L	0.059215
SERTAD1	0.10526	-0.582014		STK40	N/A	-0.598911		EPHA2	0.0758883	-1.14569		KLF10	0.373316	-0.143087															EGR1	0.0610801
TGIF1	0.495025	-0.561706		MAP3K14	0.113863	-0.589049		SERTAD1	0.0246485	-1.14036		SERTAD1	0.240275	-0.0883417															ARC	0.0628274
FAM110C	0.20631	-0.557683		MOB3A	0.0447275	-0.578976		ARID3B	0.0118492	-1.13665		Nppb	0.99503	-0.0604508															EGR2	0.0644208
GCNT2	0.322919	-0.522564		ARL4C	0.034481	-0.542104		MAFF	0.0650771	-1.13663		MAP3K14	0.918945	-0.0480431															MAFF	0.0650771
ZSWIM4	0.100144	-0.500486		ZC3H12A	0.0561466	-0.504037		EREG	0.000230348	-1.12868		KLF4	0.570758	-0.0198855															SPRY2	0.065491
SMAD7	0.0610988	-0.492996		GEM	0.286816	-0.48031		SGK1	0.221962	-1.11062		SERPINE1	0.764168	-0.00177595															EGR3	0.0683837
KLF10	0.206096	-0.485401		NFIL3	0.27726	-0.473791		SMAD7	0.0396202	-1.08776		ZFP36L2	0.469703	0.0500056															C8orf4	0.0718118
FHL3	0.162978	-0.483265		ATF3	0.523503	-0.429766		SEMA7A	0.0821456	-1.08385		LIF	0.109207	0.0836547															MYC	0.075762
LIF	0.0823362	-0.460858		CITED2	0.140272	-0.387803		TNFSF18	0.188431	-1.07877		MNT	0.555804	0.105254															EPHA2	0.0758883
NAB2	0.0787624	-0.454531		SERTAD1	0.210992	-0.383485		IRF2BPL	0.0545845	-1.07183		PHLDA1	0.526561	0.108525															SEMA7A	0.0821456
DUSP1	0.260988	-0.450441		IER5L	0.11971	-0.368808		LFNG	0.086592	-1.02887		RGS16	0.980984	0.143553															LFNG	0.086592
NR4A1	0.364084	-0.446004		BDNF	N/A	-0.352617		FAM110C	0.147833	-0.991935		NFIL3	0.591985	0.155406															PARD6B	0.0945614
MAP3K14	0.205588	-0.430886		MAFF	0.233639	-0.341488		PIM1	0.119852	-0.966645		BDNF	0.222299	0.193769															EGR4	0.10146
CYR61	0.219441	-0.410782		KLF4	0.124977	-0.303137		DNAJB1	0.0441162	-0.948358		SKIL	0.628658	0.195811															FOS	0.103642
SRF	0.403456	-0.389838		PPP1R15A	0.160879	-0.302161		CTGF	0.172463	-0.920216		NAB2	0.424826	0.240788
ARL4C	0.0375447	-0.361978		ERRFI1	0.462466	-0.285261		CCRN4L	0.059215	-0.894842		MAFK	0.101747	0.251021
CCRN4L	0.184201	-0.360289		FAM110C	0.854199	-0.259322		RGS16	0.181367	-0.851516		CYR61	0.506199	0.259646
ARID3B	0.2793	-0.326578		EREG	0.169251	-0.254269		PIM3	0.0342591	-0.838469		PPP1R15A	0.065319	0.304134
CITED2	0.295413	-0.318973		ZFP36	0.211576	-0.253568		FOSL1	0.369109	-0.763759		RHOB	0.375524	0.31132
EREG	0.355445	-0.313188		HBEGF	0.317184	-0.196604		C8orf4	0.0718118	-0.755227		PIM3	0.120953	0.317105
PLAU	0.514607	-0.290821		PIM3	0.123928	-0.181026		SLC2A1	0.142176	-0.732856		IER5	0.429847	0.329631
SERPINE1	0.397029	-0.275455		SMAD7	0.0499578	-0.178899		PLK3	0.0237611	-0.686885		FOSL1	0.589865	0.344121
PIM3	0.115099	-0.260532		MAFK	0.195276	-0.165708		FHL3	0.301529	-0.640382		FOSL2	0.438564	0.352025
IER5L	0.0749577	-0.255761		DUSP4	0.465996	-0.164552		ELMSAN1	0.629262	-0.640354		ELMSAN1	0.406404	0.383125
DNAJB1	0.235807	-0.243469		KLF10	0.35276	-0.16342		ZSWIM4	0.0147666	-0.612994		PLK3	0.536334	0.384908
IRF2BPL	0.125143	-0.224973		ZFP36L2	0.128468	-0.159693		ANKRD1	0.204851	-0.600594		GEM	0.470461	0.460057
PIM1	0.587114	-0.21166		PLK3	0.152483	-0.156982		MOB3A	0.174883	-0.569222		PER1	0.22185	0.487942
PLOD3	0.08923	-0.208548		DUSP5	0.478266	-0.14415		ARL4C	0.12306	-0.536192		TGIF1	0.253171	0.501703
HBEGF	0.475346	-0.201717		DUSP1	0.562166	-0.113513		F3	0.0350503	-0.522605		CSRNP1	0.265407	0.515206
IRF2BP2	0.127734	-0.195215		IRF2BPL	0.207683	-0.0897672		IRF2BP2	0.0244784	-0.507089		DUSP1	0.189443	0.531802
F3	0.634592	-0.149571		CYR61	0.741196	-0.0875358		PARD6B	0.0945614	-0.476821		IRF2BP2	0.0946354	0.625055
MOB3A	0.419458	-0.148068		CEBPB	N/A	-0.0567131		VASN	0.157819	-0.469245		MAFF	0.190551	0.635708
CEBPB	N/A	-0.146941		ELMSAN1	0.922509	-0.0392548		Nppb	0.85018	-0.343795		KLF9	0.0121452	0.645435
BDNF	N/A	-0.128039		KLF6	0.718527	-0.0389411		CEBPB	0.5	-0.341044		KLF6	0.105127	0.680421
STK40	N/A	-0.120727		FOSL2	0.377636	-0.0184619		SERPINE1	0.525038	-0.33475		FAM110C	0.0914232	0.710347
MAFK	0.500028	-0.115014		IER2	0.685158	-0.00651127		BDNF	0.222299	-0.326647		VASN	0.00659669	0.718238
SLC2A1	0.344553	-0.101779		LFNG	0.639739	0.00556506		SRF	0.584196	-0.323889		IER2	0.0335662	0.74856
INSIG1	0.79577	-0.0791769		SKIL	0.0375226	0.00787831		HOMER1	0.0130009	-0.300903		ZSWIM4	0.0921401	0.801498
JUNB	0.696854	-0.0712497		DNAJB1	0.981218	0.011257		LIF	0.22344	-0.299038		JUN	0.0786411	0.826381
IER5	0.555588	-0.0606758		TGIF1	0.495025	0.021487		IER5	0.252637	-0.247462		JUNB	0.0604984	0.839396
VASN	0.397686	-0.0506427		PLOD3	0.357507	0.0228136		Klf16	0.215617	-0.218984		ARID5A	0.0220091	0.883376
PLAUR	0.84026	-0.0349311		EGR2	0.899685	0.0487782		PLAUR	0.887521	-0.195927		OTUD1	0.00906866	0.915078
SLC25A25	0.0178591	-1.599		JUNB	0.760347	0.0527575		MAFK	0.26602	-0.192923		ZFP36	0.0264783	0.926342
Klf16	0.206152	-0.000200146		SPRY2	0.82416	0.0660031		PLAU	0.784644	-0.190786		PTGS2	0.262552	0.959981
OTUD1	0.340036	0.00567714		PER1	0.495025	0.138171		CYR61	0.802377	-0.179953		DUSP4	0.237592	0.981217
KLF4	0.885897	0.0184018		JUN	0.986995	0.195681		SKIL	0.135332	-0.171622		DUSP5	0.109505	1.03422
LFNG	0.889564	0.0336064		HES1	0.433635	0.195706		STK40	0.221989	-0.131462		DUSP6	0.00266391	1.04873
BTG2	0.871152	0.132217		BTG2	0.979904	0.213073		SDC4	0.276761	-0.0612284		NR4A1	0.0485695	1.06083
ELMSAN1	0.939664	0.139434		RHOB	0.978085	0.220772		C3orf52	0.287194	-0.00535616		IER3	0.00906695	1.07693
ARID5A	0.841268	0.156716		MNT	0.28305	0.287501		ZFP36	0.96965	0.0501045		PIM1	0.00239556	1.0856
SGK1	N/A	0.205878		PIM1	0.239998	0.292577		MNT	0.695629	0.0703237		FOS	0.0390122	1.08822
ZFP36	0.708089	0.232304		DUSP10	0.803525	0.313947		INSIG1	0.61581	0.0975943		MYC	0.0112027	1.10434
HOMER1	0.769924	0.233731		DUSP6	0.708759	0.327624		OTUD1	0.984175	0.155727		ATF3	0.0659543	1.13496
ZC3H12A	0.450282	0.264662		SGK1	N/A	0.33119		ZC3H12A	0.36474	0.199459		DNAJB1	0.0874935	1.15497
RHOB	0.71016	0.296044		IFRD1	0.30029	0.341711		NR4A1	0.582052	0.210842		SDC4	0.0990925	1.16811
SKIL	0.628407	0.372119		NAB2	0.223306	0.365773		PER1	0.22185	0.290213		HBEGF	0.123347	1.16981
IFRD1	0.138099	0.372497		IRF2BP2	0.859633	0.371138		KLF4	0.45296	0.292897		EGR2	0.0897406	1.19339
PER1	0.495025	0.417903		OTUD1	0.417549	0.417915		PPP1R15A	0.112704	0.298765		SPRY2	0.154417	1.20501
SEMA7A	0.688971	0.448275		KLF9	0.153255	0.423786		PTGS2	0.651417	0.334774		C3orf52	0.0762722	1.22379
PARD6B	0.349762	0.449315		ARID5A	0.175905	0.461827		IFRD1	0.283944	0.429361		TRIB1	0.0542703	1.23655
PPP1R15A	0.0119359	0.465877		IER3	0.721365	0.465758		SLC25A25	0.055678	0.463269		BTG2	0.0339883	1.31163
KLF6	0.214388	0.468009		NR4A1	0.313737	0.523311		DUSP1	0.378635	0.506157		CCRN4L	0.160635	1.36406
SDC4	0.270041	0.475463		VASN	0.0508869	0.533963		NFIL3	0.283935	0.511639		EREG	0.252033	1.40048
PTGS2	0.522058	0.593696		SDC4	0.000953248	0.561184		CITED2	0.336233	0.51681		IFRD1	0.0677947	1.45005
NFIL3	0.0165108	0.651291		ARID3B	0.0811092	0.620731		ARID5A	0.20067	0.570509		ARID3B	0.0403857	1.4602
GEM	0.024581	0.659704		ZSWIM4	0.0117549	0.623966		NIPAL1	0.869646	0.575267		DUSP10	0.134605	1.53768
MNT	0.150373	0.6759		FOSB	0.296626	0.634373		KLF9	0.126967	0.600515		NR4A3	0.0476967	1.56033
KLF9	0.164323	0.893148		C3orf52	0.0644132	0.714332		BTG2	0.238296	0.608781		SEMA7A	0.223366	1.68519
IER3	0.246223	0.924269		HOMER1	0.173583	0.727667		DUSP10	0.138543	0.77901		EGR1	0.0100293	1.7398
NIPAL1	0.271932	0.944865		FOS	0.348443	0.876484		GEM	0.192931	0.780512		EGR3	0.0466746	1.74091
DUSP10	0.112651	0.963784		C8orf4	0.300968	0.878723		RHOB	0.222035	0.787908		ERRFI1	0.136251	1.78381
CSRNP1	0.0377024	1.01914		SEMA7A	0.125151	0.997347		CSRNP1	0.130467	0.80139		HOMER1	0.0658796	1.82268
FOSB	0.558539	1.02278		ARC	0.664163	1.06661		IER3	0.151177	0.937047		HIST1H1D	0.00100829	1.8351
ATF3	0.0163256	1.05819		EGR3	0.0895968	1.07918		KLF6	0.0316393	1.08505		ARC	0.0665536	1.84166
JUN	0.022345	1.17498		NIPAL1	0.247911	1.14003		FOSL2	0.0255002	1.10476		FOSB	0.0997036	1.9836
NR4A3	0.0314479	1.18568		EGR1	0.180425	1.23863		NR4A3	0.139451	1.18268		SGK1	0.221962	2.04643
FOSL2	0.00265957	1.25472		NR4A3	0.0193509	1.26456		ATF3	0.10364	1.48081		C8orf4	0.267987	2.07962
C3orf52	0.174628	1.85239		HIST1H1D	0.00913801	1.69723		JUN	0.0224989	1.55036		NIPAL1	0.161822	2.64474

## Sheet: 4hrPDGF
Gene	4 hr PDGF PD: p-value	log2 FC (4 hr PDGF PD)		Gene	4 hr PDGF LY: p-value	log2 FC (4 hr PDGF LY)			PDGF-PD up	p value		PDGF-PD down	p value		PDGF-LY up	p value		PDGF-LY down	p value
ZCCHC5	0.133056	-1.93669		MYOG	0.173062	-2.69142			PHIP	0.000159736		C15orf39	0.00599943		TXNIP	0.000459791		ELK1	0.000235701
GPRIN3	0.112592	-1.5514		PALM3	0.0450478	-2.61046			RIN2	0.000195319		PRPS2	0.00639472		RIN2	0.000951157		FAM127C	0.000390435
LARS2	0.139189	-1.34494		HS3ST6	0.00834542	-2.5635			BMF	0.000555451		SOX9	0.00660918		Acaa1b	0.00120208		G0S2	0.000451494
CHST15	0.0363162	-1.33338		TLR7	0.00249199	-2.51192			ARMCX6	0.000796084		RSPO3	0.0113351		ARMCX6	0.00124936		GLI2	0.000631318
CRABP1	0.245229	-1.28372		TBXA2R	0.0104228	-2.32621			DIXDC1	0.00126339		TWF2	0.0147396		MXD1	0.00145402		Anp32a	0.00164611
Rpl29 (includes others)	0.898542	-1.19559		GPRIN3	0.0171307	-2.29399			PIAS1	0.00127969		MTHFS	0.0166796		MYLIP	0.00155311		TLR7	0.00249199
SOX9	0.00660918	-1.1935		DCAF12L2	0.00845533	-2.28431			WDR45	0.00218228		GPX1	0.0168838		MTHFS	0.00157257		CRYAB	0.00265544
SLC27A3	0.021314	-1.18822		ADAMTS1	0.0224504	-2.24322			Otud5	0.00301212		SLC27A3	0.021314		AMOTL2	0.00196909		PIDD1	0.00350407
SHISA2	0.0523136	-1.14865		PIF1	0.0870412	-2.20336			TCEAL6	0.00311445		LPAR4	0.021489		WDR45	0.00222842		RAB9A	0.00417661
Rplp1 (includes others)	0.0832863	-1.07955		SHISA2	0.0292089	-2.18601			WNT16	0.00357958		EIF2S3	0.0249144		IP6K1	0.00315434		EIF2S3	0.00424844
RSPO3	0.0113351	-1.0165		G0S2	0.000451494	-2.16345			RSPO2	0.00515421		FOXL2	0.0313784		Otud5	0.00375063		PIK3C2B	0.00435445
NDUFA1	0.115943	-0.975566		NSDHL	0.0706976	-1.77823			ABCA1	0.0054026		CHST15	0.0363162		IP6K2	0.00431313		RASSF4	0.00473681
LINGO1	0.0593373	-0.974894		ZCCHC5	0.137726	-1.77169			TET1	0.00598646		MYLIP	0.0371325		CACNB3	0.00591746		KLHDC7A	0.00477759
DCAF12L2	0.0431025	-0.955529		ARHGEF19	0.0111883	-1.75015			ZC2HC1C	0.00696116		FAM127C	0.0414129		HMG20A	0.00629013		PMP22	0.00505901
LPAR4	0.021489	-0.955248		WSCD2	0.0308673	-1.60173			CLMN	0.00746105		DCAF12L2	0.0431025		TRAFD1	0.006916		NDUFAF3	0.00773443
RGCC	0.280561	-0.943153		MOB3B	0.0161051	-1.53575			MXD1	0.00771137		POMGNT2	0.0434579		GPR157	0.00781975		PRICKLE1	0.00783365
GPX1	0.0168838	-0.925903		DUSP27	0.31188	-1.52609			ARTN	0.00785202		ID1	0.0437921		PHIP	0.00809693		HS3ST6	0.00834542
COX7A2	0.0860691	-0.860544		BBOX1	0.22606	-1.44323			MAGED1	0.00815977		FOXC1	0.0457751		NFIX	0.00883514		DCAF12L2	0.00845533
LMCD1	0.19627	-0.828353		LMCD1	0.00903466	-1.42105			NFIX	0.00883514		DACT3	0.0482419		PLXNA3	0.00914654		SOX9	0.00846154
MAPKAPK3	0.0577149	-0.810853		EBP	0.0635518	-1.3775			DACT1	0.00897745		SHISA2	0.0523136		EFNA4	0.0100921		MAGEH1	0.00862529
C15orf39	0.00599943	-0.772643		KLHDC7A	0.00477759	-1.37146			ZNF467	0.00903105		MAPKAPK3	0.0577149		PDK2	0.0100998		LMCD1	0.00903466
DACT3	0.0482419	-0.60909		RCSD1	0.698909	-1.36016			LRRC75B	0.00954359		LINGO1	0.0593373		APH1B	0.0104159		FZD2	0.0103389
ATOH8	0.161715	-0.591818		KIF21B	0.0855059	-1.31626			SKIDA1	0.0110633		TOX	0.062788		PIK3R4	0.0111997		TBXA2R	0.0104228
TBXA2R	0.226417	-0.56524		BMP3	0.0441914	-1.31021			CACNB3	0.0110794		KDM5C	0.0717636		CNNM2	0.011559		LIMS2	0.0106954
COX7B	0.204146	-0.564081		ADAMTS15	0.188902	-1.28537			GPR156	0.0116132		MPPED2	0.0732784		KCNJ2	0.0154867		ARHGEF19	0.0111883
MTHFS	0.0166796	-0.552909		MAB21L3	0.0134992	-1.2702			DENND4A	0.0141367		Rplp1 (includes others)	0.0832863		SNX33	0.0158159		PRPS2	0.012171
Tmem115	0.185879	-0.551803		STAC	0.0823633	-1.26948			CLK3	0.0163746		CAPN5	0.0848602		HDAC11	0.0174538		DHRS3	0.0134167
HYAL2	0.229189	-0.551779		GFRA2	0.0880332	-1.2645			OSR1	0.0169556		COX7A2	0.0860691		ZFR2	0.0175291		MAB21L3	0.0134992
FAM69C	0.250546	-0.545495		SOX9	0.00846154	-1.2631			GAS1	0.0193813					YPEL2	0.0284982		MON1A	0.014012
MPPED2	0.0732784	-0.515818		IL15	0.253474	-1.25024			EFNA4	0.0200871					RBM5	0.0287783		LRRC75B	0.0145289
EIF2S3	0.0249144	-0.512282		RAB27A	0.018073	-1.23861			FAT4	0.021571					TCTA	0.0307656		SLITRK5	0.0145519
BBOX1	0.572908	-0.509218		CRABP1	0.228918	-1.21751			GPR173	0.0328208					PIAS1	0.0312435		RBM15B	0.0146414
ENTPD3	0.412691	-0.500041		TMEM119	0.0426051	-1.20426			IFFO1	0.0338903					ZNF395	0.0323278		COX7A2	0.0149619
CXorf40A/CXorf40B	0.439952	-0.483259		D430019H16Rik	0.0676933	-1.19857			NYNRIN	0.0362694					MED12	0.034855		PDZRN4	0.0151456
TIMM17B	0.344536	-0.464973		SERPINB9	0.0350797	-1.16259			Acaa1b	0.0375848					MTSS1	0.0417607		MOB3B	0.0161051
FOXC1	0.0457751	-0.452675		NME6	0.0503674	-1.14945			ACAA1	0.041721					ATG16L2	0.0483784		ARTN	0.0164967
TSPAN7	0.26659	-0.444389		RASSF4	0.00473681	-1.12944			LAMB2	0.0425849					DDX26B	0.0491503		GPRIN3	0.0171307
PALM3	0.946384	-0.441555		NKD1	N/A	-1.11839			KCNE4	0.0460786					INHA	0.0493381		C15orf39	0.0176702
KLF15	0.30004	-0.430018		SLITRK5	0.0145519	-1.11044			MEGF9	0.0544118					LENG8	0.0502988		CSDC2	0.0179832
PIF1	0.555085	-0.428326		ADAMTS5	0.0653308	-1.10047			SMAD9	0.0576451					ZNF467	0.0515247		RAB27A	0.018073
P2RY6	0.535838	-0.417523		P2RY6	0.17802	-1.09869			ATG16L2	0.058805					ABCA1	0.0527171		ADCY1	0.0205968
RNF144B	0.53947	-0.403298		MAPKAPK3	0.0644613	-1.08004			MMP11	0.0616169					ASAP3	0.0531186		ADAMTS1	0.0224504
LOXL1	0.213785	-0.399867		Rpl29 (includes others)	0.742503	-1.06553			RGMA	0.0625951					RNF167	0.0531687		EMD	0.0224947
HS3ST6	0.411425	-0.398877		INSC	0.0640741	-1.06144			ADAMTS15	0.0629549					ACAA1	0.0550579		PARP3	0.0230987
PRPS2	0.00639472	-0.3965		STARD8	0.117764	-1.0342			PTPN23	0.0734825					LAMB2	0.0551724		NHSL1	0.027263
TOX	0.062788	-0.392944		PALMD	0.178317	-1.03178			RASL11B	0.0751845					PRSS35	0.0558805		LMTK3	0.0277869
NME6	0.693042	-0.389652		Nacad	0.0427082	-1.02464			ASAP3	0.0851879					USP11	0.0592773		SHISA2	0.0292089
CACNB2	0.543663	-0.378684		ARTN	0.0164967	-1.01684			TCEAL5	0.0862455					JAK3	0.0624509		Tmem115	0.0304598
ANAPC13	0.918772	-0.375546		RNF144B	0.238807	-0.982017			AUTS2	0.0915284					Fam193b	0.0646754		DZIP1L	0.0305653
TMEM119	0.371686	-0.364274		FRY	0.0837172	-0.978659			FAM53B	0.0916588					IGDCC4	0.0662263		WSCD2	0.0308673
RBM15B	0.182407	-0.356662		ARMCX4	0.0313793	-0.955834			METTL7A	0.0917917					C11orf87	0.0696189		ARMCX4	0.0313793
Hmgb3	0.795857	-0.353185		LRRC75B	0.0145289	-0.954639			CBX8	0.0948176					TBL1X	0.07525		GPX1	0.0339793
EMD	0.215824	-0.346059		FAM69C	0.0821477	-0.939082			INSL6	0.0955153					CLK3	0.0778629		SERPINB9	0.0350797
UQCRC1	0.503544	-0.340332		MAP2K6	0.044448	-0.896991			MTSS1	0.0989808					FOXO4	0.0779244		KDM5C	0.0376616
GNAI2	0.341024	-0.321498		LARS2	0.325903	-0.882767									FGF18	0.0919219		PIK3R3	0.0409736
ADCY1	0.152744	-0.321485		ID2	0.115902	-0.870676									AMT	0.0946994		COMMD4	0.041967
EBP	0.534505	-0.319252		P4HTM	0.189063	-0.85886												TMEM119	0.0426051
HSD17B10	0.6119	-0.31422		SMAD9	0.0437077	-0.855019												Nacad	0.0427082
RBP1	0.808239	-0.307529		CACNB2	0.174195	-0.835704												SMAD9	0.0437077
TLR7	0.190877	-0.306975		PDZRN4	0.0151456	-0.826676												BMP3	0.0441914
PTX3	0.220697	-0.296536		KCNE4	0.296831	-0.786463												MAP2K6	0.044448
CYB561D2	0.256412	-0.293449		PIK3C2B	0.00435445	-0.77777												PALM3	0.0450478
TSPAN3	0.186959	-0.288757		WISP2	0.313784	-0.772862												PLXNB1	0.0461001
ATP6AP1	0.15212	-0.28433		ADCY1	0.0205968	-0.767362												DACT3	0.0461676
TWF2	0.0147396	-0.250218		SLC27A3	0.0637937	-0.756697												OSR1	0.0481464
FZD2	0.136394	-0.23621		COX7A2	0.0149619	-0.756329												LINGO1	0.0494788
MON1A	0.13689	-0.225418		PIDD1	0.00350407	-0.740601												NME6	0.0503674
FAM127C*	0.0414129	-0.221578		NHSL1	0.027263	-0.739239												CELF5	0.0519264
FAM127C*	0.0456788	-0.221578		Anp32a	0.00164611	-0.734109												LPAR4	0.0523477
Anp32a	0.585158	-0.217979		EEF2K	N/A	-0.726181												CYB561D2	0.0629713
STARD8	0.595999	-0.212183		GLI2	0.000631318	-0.721114												EBP	0.0635518
WSCD2	0.806264	-0.209118		CYB561D2	0.0629713	-0.704301												SMAD6	0.0635972
SLC7A2	0.437406	-0.202736		CRYAB	0.00265544	-0.698544												SLC27A3	0.0637937
CRYAB	0.104588	-0.181077		TET1	0.10188	-0.692662												INSC	0.0640741
TRAK1	0.422574	-0.177651		LIMS2	0.0106954	-0.689791												MAPKAPK3	0.0644613
SERPINB9	0.399269	-0.174517		DACT3	0.0461676	-0.665523												ADAMTS5	0.0653308
NSDHL	0.746869	-0.158629		NDUFA1	0.148752	-0.651493												D430019H16Rik	0.0676933
PIK3R4	0.376321	-0.158317		TCEAL5	0.146269	-0.640099												NSDHL	0.0706976
EEF2K	N/A	-0.153918		RBP1	0.448159	-0.620811												RSPO3	0.0735141
NDUFAF3	0.112546	-0.15366		SLC7A3	0.2369	-0.614539												Nmnat3	0.0773102
POMGNT2	0.0434579	-0.145724		FZD2	0.0103389	-0.603746												TSPAN7	0.0810951
BCL9L	0.636939	-0.142636		LINGO1	0.0494788	-0.602964												KLHL38	0.0821098
SLC7A3	0.701975	-0.136611		MTUS2	0.0878636	-0.599617												FAM69C	0.0821477
Nmnat3	0.31761	-0.136377		KCTD8	0.12916	-0.576867												STAC	0.0823633
MTUS2	0.79086	-0.132287		HYAL2	0.150319	-0.57304												FRY	0.0837172
ID3	0.637925	-0.128793		MPI	0.118628	-0.567945												KIF21B	0.0855059
IDH3G	0.785273	-0.115753		RSPO2	0.238918	-0.537541												PIF1	0.0870412
HES6	0.730984	-0.111403		COMMD4	0.041967	-0.535492												MTUS2	0.0878636
Lage3	0.597889	-0.103158		Hmgb3	0.198759	-0.53354												GFRA2	0.0880332
COMMD4	0.418003	-0.0974919		KLHL38	0.0821098	-0.522127
NUDT11	0.713484	-0.0952822		OSR1	0.0481464	-0.521378
ABCD1	0.770556	-0.0951819		PMP22	0.00505901	-0.518649
NOTCH3	0.436304	-0.095085		Rplp1 (includes others)	0.162425	-0.518583
RAB27A	0.714829	-0.0910774		PIK3R3	0.0409736	-0.511931
HEXA	0.595316	-0.0864515		FAM127C*	0.00136089	-0.507477
MYLIP	0.0371325	-0.0812848		FAM127C*	0.000390435	-0.507477
LIMS2	0.512729	-0.0795542		FGFR2	0.158226	-0.506763
FOXL2	0.0313784	-0.0724656		DZIP1L	0.0305653	-0.488909
KAZALD1	0.723197	-0.0719652		PRICKLE1	0.00783365	-0.474753
SEMA3F	0.678638	-0.0667347		RGCC	0.549548	-0.465837
ELK1	0.397574	-0.0575132		PARP3	0.0230987	-0.463714
HMGCLL1	0.406223	-0.0562812		OLFML1	0.471165	-0.431168
TXNIP	0.372568	-0.055827		RGMA	0.157136	-0.428209
HYKK	0.287706	-0.0538238		P2RX6	0.272228	-0.427209
ARHGEF19	0.678068	-0.0515394		PLXNB1	0.0461001	-0.415798
ACVR2B	0.894425	-0.0441091		TIMM17B	0.190715	-0.409495
DUSP27	0.219909	-0.0433524		C15orf39	0.0176702	-0.408643
CAPN5	0.0848602	-0.0405578		ARHGEF6	0.134445	-0.401962
GLI2	0.978189	-0.040446		TSPAN7	0.0810951	-0.398498
MPI	0.870321	-0.0378744		EMD	0.0224947	-0.393656
D430019H16Rik	0.964486	-0.0335911		ADRA2A	0.278778	-0.393623
G0S2	0.906269	-0.0298322		MPPED2	0.121988	-0.387183
KLHDC7A	0.552952	-0.028257		NDUFAF3	0.00773443	-0.37594
MRAS	0.98715	-0.0236818		LMTK3	0.0277869	-0.37593
FAM3A	0.837669	-0.0191125		Nmnat3	0.0773102	-0.369079
KDM5C	0.0717636	-0.0182029		TCEAL6	0.326616	-0.36254
MAB21L3	0.832091	-0.0139528		FAM53B	0.776693	-0.356178
EPHB3	0.867399	-0.0135171		HES6	0.262834	-0.348444
UBQLN2	0.74182	-0.00625696		ATOH8	0.218846	-0.348429
FAM127A	0.149974	-0.00615795		UQCRC1	0.194646	-0.335764
TBL1X	0.740574	-0.0039723		RSPO3	0.0735141	-0.335402
ALX1	0.669652	0.00103321		PEG3	0.453589	-0.333564
PCCB	0.984624	0.0088724		LPAR4	0.0523477	-0.327868
SLC25A38	0.694002	0.011956		COX7B	0.273741	-0.323344
DZIP1L	0.256681	0.0141359		INSL6	0.380621	-0.319044
MAGEH1	0.833114	0.0211285		GNAI2	0.230963	-0.318132
APH1B	0.551014	0.0231283		PRPS2	0.012171	-0.312418
APEH	0.799476	0.0279947		ELK1	0.000235701	-0.308421
PMP22	0.429261	0.0296801		RAB3IL1	0.77376	-0.297935
KLHL29	0.992537	0.0401915		LOXL1	0.141386	-0.289298
PEG3	0.629039	0.0449224		DACT1	0.557482	-0.287788
KLHL18	0.898486	0.0540372		CELF5	0.0519264	-0.28139
ZNF395	0.705849	0.0563512		CSDC2	0.0179832	-0.281381
ADAMTS5	0.808481	0.0580682		KLF15	0.337767	-0.279705
GPR157	0.746211	0.0631723		FAM50A	0.921684	-0.278436
FAM50A	0.197913	0.0638987		EIF2S3	0.00424844	-0.277034
PIK3C2B	0.718779	0.0642121		DHRS3	0.0134167	-0.265211
SMAD6	0.541968	0.0696271		GPR156	0.26609	-0.260148
TRAFD1	0.203845	0.0729048		ID3	0.352129	-0.249765
MAGEE1	0.883114	0.0815946		KLHL18	0.272597	-0.221201
KCNJ2	0.128245	0.0867769		MAGEH1	0.00862529	-0.216424
FAM53B	0.0916588	0.1016		BCL9L	0.351402	-0.215643
CAPN6	0.765926	0.103162		KDM5C	0.0376616	-0.214835
SNX33	0.795526	0.103527		GPX1	0.0339793	-0.211589
ADAMTS7	0.751337	0.103815		NUDT11	0.3062	-0.210667
HMG20A	0.727958	0.104964		FAM127A	0.277013	-0.207417
MEF2C	0.619325	0.107197		TSPYL2	0.660158	-0.206723
BCORL1	0.514703	0.121309		SKIDA1	0.158199	-0.203962
ID1	0.0437921	-0.938875		HSD17B10	0.630101	-0.20173
EFNA4	0.0200871	0.129977		RBM15B	0.0146414	-0.198121
ADAMTS1	0.723633	0.133704		MRAS	0.107029	-0.192321
ATP13A2	0.973203	0.14031		MON1A	0.014012	-0.187432
RASSF4	0.315805	0.140332		Tmem115	0.0304598	-0.185376
PRAF2	0.401278	0.14384		RAB9A	0.00417661	-0.185079
PLCD1	0.278612	0.144345		ZC2HC1C	0.820397	-0.185058
POU3F4	0.585516	0.147174		POU3F4	0.805304	-0.182947
INSC	0.738205	0.152149		CXorf40A/CXorf40B	0.677567	-0.17753
CBX8	0.0948176	0.152882		PPP1R3C	0.729075	-0.167702
SLITRK5	0.841925	0.160176		MRGPRE	0.745017	-0.162738
RAB9A	0.406739	0.165736		C10orf54	0.676927	-0.153135
RCSD1	0.495025	0.169092		SEMA3F	0.576136	-0.152271
WDR45	0.00218228	0.171723		NCKIPSD	0.324305	-0.150424
PARP3	0.515317	0.177416		CDC42EP2	0.494905	-0.147436
PGRMC1	0.696966	0.193444		RIMS2	N/A	-0.136986
AMOTL2	0.242108	0.194757		ANKRD44	0.203459	-0.135109
ZNF503	0.871976	0.200514		APEH	0.548065	-0.129939
L1CAM	0.662487	0.202797		PLCD1	0.762076	-0.128846
PRICKLE1	0.120802	0.204714		FIGN	0.495025	-0.124037
FOXO4	0.271501	0.211382		L1CAM	0.984628	-0.121169
Otud5	0.00301212	0.215326		KCND1	0.522909	-0.110862
Zfp651	0.201679	0.22256		ADAMTS7	0.726392	-0.108401
KCND1	0.952437	0.222636		IDH3G	0.824399	-0.105424
MZF1	0.707152	0.22285		SLC7A2	0.518324	-0.104385
ABHD14B	0.396097	0.229487		SMAD6	0.0635972	-0.101463
NICN1	0.273826	0.234733		ZNF579	0.180908	-0.0952099
MAGED1	0.00815977	0.240901		UBQLN2	0.129288	-0.093406
APBB1	N/A	0.241947		AUTS2	0.688578	-0.0918773
SNAPC5	0.296254	0.242916		ANAPC13	0.230831	-0.0882692
NCKIPSD	0.186133	0.245208		KLHL13	0.236888	-0.0859911
ACAA1	0.041721	0.246211		CHST15	0.431551	-0.0833495
P4HTM	0.525046	0.257873		MAGED1	0.298404	-0.0826568
ARHGEF6	0.437496	0.257912		PLEKHA7	0.520026	-0.0664433
FBXL7	0.556607	0.265098		Lage3	0.313912	-0.0573962
GAB1	0.125022	0.267011		ABCD1	0.857936	-0.05451
PLXNA3	0.207525	0.267974		DIXDC1	0.337148	-0.0544018
PDK2	0.549811	0.26936		PYGO1	0.973333	-0.0536558
KDM6A	0.488363	0.284871		PCCB	0.702815	-0.0498969
PTPN23	0.0734825	0.286204		FBXL7	0.402345	-0.0454218
MXD4	0.168202	0.295804		MEF2C	0.225238	-0.042483
NFIX	0.00883514	0.300169		HYKK	0.305134	-0.0414332
MRGPRE	0.458732	0.300654		ID1	0.195685	-0.469417
ADRA2A	0.952234	0.301989		FOXL2	0.342266	-0.0278961
DYRK1B	0.467654	0.304217		DRP2	0.667656	-0.0243912
PYGO1	0.161923	0.307505		MMP11	0.514407	-0.0222752
PPCDC	0.787455	0.328469		TRAK1	0.79288	-0.00848523
USP11	0.306362	0.332568		TOX	0.389448	-0.00752071
TCTA	0.627913	0.335655		PPCDC	0.895836	-0.00416454
RAB3IL1	0.201644	0.337455		FAM3A	0.95486	0.00213894
KLHL13	0.503587	0.342633		PTX3	0.848733	0.00715223
TET1	0.00598646	0.348737		PTPN23	0.865401	0.00983998
NPRL2	0.314723	0.356843		HMGCLL1	0.517187	0.0143435
Nacad	0.447134	0.366983		ABHD14B	0.78386	0.0146138
CACNB3	0.0110794	0.371379		EPHB3	0.975504	0.0161832
CSDC2	0.3525	0.372395		CBX8	0.24738	0.0173089
IP6K1	0.123352	0.374131		WNT16	0.776948	0.0188978
ARMCX4	0.145807	0.374299		MAOA	0.610719	0.0197536
CNNM2	0.741517	0.379048		ZNF467	0.0515247	0.022415
METTL7A	0.0917917	0.385016		TWF2	0.146794	0.0262707
NYNRIN	0.0362694	0.391139		KLHL29	0.89393	0.0298333
IL15	0.932171	0.397348		ACVR2B	0.775749	0.0350701
KIF21B	0.303329	0.403901		SLC25A38	0.984183	0.0381722
CLK3	0.0163746	0.420133		ACAA1	0.0550579	0.0488667
SMAD9	0.0576451	0.422184		IGDCC4	0.0662263	0.0626131
C10orf54	0.816544	0.422745		C11orf87	0.0696189	0.0628131
FRY	0.140564	0.428342		CAPN6	0.795627	0.063299
ANKRD44	0.142564	0.432378		Gsta4	0.618592	0.0703557
TCEAL6	0.00311445	0.444735		Zfp651	0.269275	0.0770876
ASAP3	0.0851879	0.449608		CNNM2	0.011559	0.0815436
LAMB2	0.0425849	0.450395		ARMCX6	0.00124936	0.0910331
FGFR2	0.371769	0.45383		NFIX	0.00883514	0.0911062
MAP2K6	0.662219	0.454618		GADD45B	0.348315	0.109732
IGDCC4	0.311885	0.455625		WNT9A	0.854553	0.110042
PLXNB1	0.220114	0.455893		ATP6AP1	0.884139	0.115507
HDAC5	0.103232	0.457552		PGRMC1	0.710755	0.119509
TMEM35	0.24283	0.46376		SNAPC5	0.115847	0.124276
PPP1R3C	0.188525	0.467238		CFP	0.727716	0.128596
ZNF579	0.556945	0.473083		Otud5	0.00375063	0.129186
ZNF467	0.00903105	0.475979		ZNF503	0.980765	0.136784
CLMN	0.00746105	0.478812		ENTPD3	0.918754	0.142237
ARMCX6	0.000796084	0.479379		TSPAN3	0.798719	0.144031
ID2	0.527782	0.483575		KDM6A	0.791529	0.148375
RGMA	0.0625951	0.515026		MAGEE1	0.631328	0.162416
GADD45B	0.279449	0.515533		PRAF2	0.162191	0.162434
GPR173	0.0328208	0.517424		TMEM35	0.940126	0.170701
FAS	N/A	0.520283		MEGF9	0.736939	0.181544
WNT9A	0.104709	0.523183		GAS1	0.746052	0.185054
CDC42EP2	0.349611	0.536108		Ptprv	0.870057	0.187211
MEGF9	0.0544118	0.550052		NYNRIN	0.251545	0.195393
AUTS2	0.0915284	0.552406		CAPN5	0.558331	0.198788
IFFO1	0.0338903	0.559439		TBL1X	0.07525	0.199161
PDZRN4	0.851681	0.570561		POMGNT2	0.492037	0.209846
HDAC11	0.388435	0.574919		IFFO1	0.193826	0.210242
TCEAL5	0.0862455	0.585417		BCORL1	0.17724	0.211554
KCTD8	0.507173	0.588114		ALX1	0.934748	0.211733
INSL6	0.0955153	0.594978		FOXC1	0.834013	0.213641
DIXDC1	0.00126339	0.598889		CACNB3	0.00591746	0.234112
GFRA2	0.471495	0.605649		Acaa1b	0.00120208	0.234171
FGF18	0.177348	0.612019		APH1B	0.0104159	0.237389
NHSL1	0.65402	0.612352		GPR173	0.144868	0.251009
PIDD1	0.488649	0.612641		TRAFD1	0.006916	0.251981
MOB3B	0.445875	0.621902		MZF1	0.647324	0.257105
PIAS1	0.00127969	0.624132		NICN1	0.210948	0.25867
MXD1	0.00771137	0.632586		SIX5	0.654443	0.260105
Gsta4	0.248702	0.637192		CLK3	0.0778629	0.262283
RASL11B	0.0751845	0.640394		AFF3	N/A	0.277953
PIK3R3	0.104024	0.654616		METTL7A	0.220867	0.30666
CELF5	0.511988	0.658453		EFNA4	0.0100921	0.306739
TCEA3	0.20289	0.660934		PIK3R4	0.0111997	0.309527
MAOA	0.127934	0.689144		GDI1	0.222635	0.310915
LRRC75B	0.00954359	0.715803		ATP13A2	0.223612	0.325023
PLEKHA7	0.206509	0.716684		ASAP3	0.0531186	0.340702
DENND4A	0.0141367	0.718775		HEXA	0.147611	0.343469
RBM5	0.158681	0.728656		CLMN	0.161034	0.344861
YPEL2	0.271842	0.748673		MXD4	0.107248	0.361539
GDI1	0.136533	0.784654		DENND4A	0.196422	0.368739
IP6K2	0.230743	0.787528		ATG16L2	0.0483784	0.372748
RIN2	0.000195319	0.788711		IP6K2	0.00431313	0.398847
WISP2	0.192721	0.825634		RASL11B	0.253606	0.401918
KCNE4	0.0460786	0.834707		NOTCH3	0.302992	0.406461
SIX5	0.404298	0.838358		HMG20A	0.00629013	0.418037
PHIP	0.000159736	0.843935		MTHFS	0.00157257	0.431585
POU3F3	0.113188	0.850219		MED12	0.034855	0.442643
MMP11	0.0616169	0.85285		FOXO4	0.0779244	0.445006
MED12	0.14341	0.854367		NPRL2	0.167186	0.449231
LMTK3	0.408751	0.872317		PRRT2	0.221214	0.452866
SKIDA1	0.0110633	0.901112		BMF	0.284688	0.456537
DRP2	0.439314	0.91899		SNX33	0.0158159	0.45911
SUV420H2	0.613606	0.920693		SUV420H2	0.515153	0.475655
STAC	0.314793	0.944103		GAB1	0.265576	0.477278
RNF167	0.165638	0.950063		KAZALD1	0.304375	0.491268
RASSF9	0.11847	0.954814		PLXNA3	0.00914654	0.494283
NKD1	N/A	0.987235		ZNF395	0.0323278	0.496564
DACT1	0.00897745	1.00073		APBB1	N/A	0.506414
TSPYL2	0.164662	1.00843		DDX26B	0.0491503	0.511655
PALMD	0.317002	1.03601		HDAC5	0.13053	0.52183
SLC22A17	0.359493	1.04022		POU3F3	0.402138	0.529514
KLHL38	0.114062	1.0452		Nrbp2	0.130127	0.532317
FAT4	0.021571	1.0509		FAS	N/A	0.537844
OSR1	0.0169556	1.05327		AMOTL2	0.00196909	0.538594
PRSS35	0.205048	1.05957		SLC22A17	0.218908	0.555539
OGT	0.991449	1.091		RBM5	0.0287783	0.568021
GAS1	0.0193813	1.1276		PHIP	0.00809693	0.59491
Nrbp2	0.297137	1.15799		FIGF	0.266478	0.614929
Ptprv	0.487319	1.17113		LAMB2	0.0551724	0.633506
MYOG	0.469781	1.18735		PIAS1	0.0312435	0.63552
BMP3	0.280021	1.1956		TCTA	0.0307656	0.643639
FIGF	0.163924	1.1976		USP11	0.0592773	0.648897
ZFR2	0.35657	1.21434		RIN2	0.000951157	0.648913
ADAMTS15	0.0629549	1.23149		FAT4	0.130439	0.695018
P2RX6	N/A	1.24913		TCEA3	0.127854	0.698663
C11orf87	0.859225	1.252		OGT	0.316431	0.73833
GPR156	0.0116132	1.27979		IP6K1	0.00315434	0.774922
OLFML1	0.1266	1.28106		Fam193b	0.0646754	0.784855
MTSS1	0.0989808	1.28954		MTSS1	0.0417607	0.789383
CFP	0.317686	1.31413		YPEL2	0.0284982	0.793166
Fam193b	0.311087	1.31658		RASSF9	0.154033	0.796241
Acaa1b	0.0375848	1.36846		HDAC11	0.0174538	0.809518
ZC2HC1C	0.00696116	1.41916		KCNJ2	0.0154867	0.814394
AFF3	N/A	1.43812		JAK3	0.0624509	0.83001
FIGN	0.495025	1.45842		FGF18	0.0919219	0.839084
JAK3	0.366206	1.45978		MXD1	0.00145402	0.842011
LENG8	0.303644	1.47088		DYRK1B	0.475609	0.858181
DDX26B	0.229516	1.47494		GPR157	0.00781975	0.88556
RIMS2	N/A	1.47952		LENG8	0.0502988	0.914033
WNT16	0.00357958	1.48974		WDR45	0.00222842	0.970598
AMT	0.194392	1.54737		MYLIP	0.00155311	1.0277
INHA	0.307392	1.57023		INHA	0.0493381	1.03196
BMF	0.000555451	1.62024		TLE2	0.187117	1.09793
ATG16L2	0.058805	1.64648		AMT	0.0946994	1.1285
DHRS3	0.103751	1.69278		PRSS35	0.0558805	1.16465
KIFC2	0.2902	1.75053		PDK2	0.0100998	1.16869
PRRT2	0.144859	1.8231		RNF167	0.0531687	1.2208
ABCA1	0.0054026	1.98288		KIFC2	0.105662	1.55741
TLE2	0.286614	2.13298		ZFR2	0.0175291	1.6802
RSPO2	0.00515421	2.35893		TXNIP	0.000459791	1.93638
ARTN	0.00785202	2.63659		ABCA1	0.0527171	1.95081

## Sheet: 4hrFGF
Gene	4 hr FGF PD: p-value	log2 FC (4 hr FGF PD)		Gene	4 hr FGF LY: p-value	log2 FC (4 hr FGF LY)			FGF-PD up	p-value		FGF-PD down	p-value		FGF-LY up	p-value		FGF-LY down	p-value
EGR1	0.0282439	-7.55058		Slfn2	0.0154346	-4.46698			DUSP10	0.00316393		PUS7	2.08735e-05		NOL8	0.00115216		PFKFB3	2.97326e-05
DMP1	0.269256	-6.09967		CLDN4	0.183292	-3.75435			MYLK2	0.00330305		ETV5	3.64715e-05		SLC25A30	0.00115274		SLC2A1	0.00143016
ARC	0.0303761	-5.98234		APLN	0.0320118	-3.46548			DUSP1	0.00401942		LRRC8D	7.94528e-05		PTPN13	0.00124088		F3	0.00173928
EGR3	0.0462788	-5.61998		WNT7A	0.16969	-3.34752			JUN	0.0190522		EAF1	0.000164843		ETV1	0.00136049		NOL9	0.00203116
EGR2	0.0301139	-5.53093		SPRR1A	0.0650221	-3.15085			NR4A1	0.0474963		NOL9	0.000230114		TBC1D1	0.00172349		SLC16A1	0.00301947
SPRR1A	0.0518851	-5.44716		DHRS9	0.0228742	-3.11945			AQP5	0.0801008		FLRT2	0.000235045		FKBP5	0.00306785		PUS7	0.0031508
APLN	0.0290073	-5.2023		Mcpt8	0.142419	-3.09657			UGCG	0.0924674		TAF4B	0.000239355		PPAP2B	0.00316984		RBPJ	0.0033792
SPRY4	0.00258523	-5.15421		IL1RN	N/A	-3.08473						SLC4A7	0.000274114		PPM1J	0.00329603		TUBA1C	0.0044101
SPRR3	0.12078	-5.11768		SPRR3	0.168377	-2.60049						BHLHE40	0.000275683		ROCK2	0.0035725		EIF1AX	0.00455856
ETV5	3.64715e-05	-4.95614		ANKRD1	0.0443014	-2.32992						NOL10	0.000382336		SPHK1	0.0054198		HK2	0.00509491
ETV1	0.0986287	-4.83423		MEOX1	0.0789202	-2.24984						JUNB	0.000395836		HIVEP2	0.0055844		TAF4B	0.00540745
SERPINB2	0.286705	-4.69871		Pbp2	0.0294773	-2.19989						DOCK4	0.000808792		SYNE3	0.00561936		TEAD4	0.00621658
MEGF10	0.0189665	-4.62433		HTR2A	0.0886214	-2.18818						MAST4	0.00123222		EMP1	0.00564131		NOP58	0.0072887
DUSP6	0.00897393	-4.58419		CRCT1	0.0904423	-2.17973						TBC1D1	0.00125911		BDP1	0.00707974		RCL1	0.00739991
PPARGC1B	0.0112557	-4.31088		PPARGC1B	0.0236992	-2.15203						RASA3	0.00131575		ETV5	0.0070845		CMTR2	0.00789741
Lce1h	0.0509651	-4.08232		IFI16	0.504931	-2.08376						C12orf45	0.00148025		SDC4	0.00710235		GRWD1	0.00933554
SEMA7A	0.0964898	-4.07574		GALNT3	0.015632	-2.04887						LIF	0.00148692		SOWAHC	0.00736449		RRS1	0.0118614
MYCN	0.0151739	-4.00648		MYCT1	0.115602	-2.02539						PIM3	0.00152535		NFE2L2	0.00810646		WDR43	0.0134813
AREG	0.0617863	-3.94056		LINGO2	0.955905	-1.70035						F3	0.00155132		VASN	0.00927125		PRKG2	0.0141063
Mcpt8	0.123359	-3.93293		KCNK13	0.563188	-1.64183						ZFP36L2	0.00241328		KIF2A	0.00995185		TOMM70A	0.0143808
PRKG2	0.00337689	-3.84995		TMEM171	0.250479	-1.59106						SPRY4	0.00258523		IFFO2	0.0110885		FAM84B	0.0149719
SSTR2	0.282986	-3.62689		9930111J21Rik1/Gm12185	0.0400198	-1.56654						FOS	0.00261881		HBEGF	0.0127342		Slfn2	0.0154346
FOS	0.00261881	-3.59816		MYCN	0.0392397	-1.52559						POLR1B	0.00266152		HIVEP3	0.0128768		LRRC8D	0.0154595
JADE2	0.00624111	-3.54927		TNFSF18	0.133863	-1.51503						PHLDA1	0.00272657		ARID5A	0.0143331		GALNT3	0.015632
ETV4	0.00275178	-3.48487		ADAMTS8	0.08986	-1.51169						ETV4	0.00275178		CCNYL1	0.0151224		POLR1B	0.0160181
Hmga2	0.00447299	-3.35021		Ccl7	0.237838	-1.47547						SPRY2	0.00312082		UGDH	0.0153437		RCC1	0.0166896
Slfn2	0.0238231	-3.30333		IL18RAP	0.133709	-1.4019						KCTD11	0.0031262		CTTNBP2NL	0.0160497		CIRH1A	0.0179071
MERTK	0.00508015	-3.29006		PRKG2	0.0141063	-1.35941						Ccl2	0.00317274		EHD4	0.0161205		RSL1D1	0.0181086
KLHDC8A	0.00881649	-3.27859		FAM84B	0.0149719	-1.34659						DIMT1	0.0032403		SIPA1L2	0.0187976		UBASH3B	0.0191289
SPP1	N/A	-3.24154		POLR3G	0.064289	-1.31189						PRKG2	0.00337689		JUN	0.0201242		DDX21	0.0196427
EVA1A	0.0136433	-3.22787		UBASH3B	0.0191289	-1.30666						DDX21	0.0038402		SNX9	0.0203412		CHCHD4	0.0198851
F2RL1	0.00437523	-3.17749		GJB2	0.309461	-1.30335						PPAP2B	0.00385072		TP53BP2	0.0218731		Pwp2	0.0217248
DAPK2	0.018378	-3.16542		SFN	0.204397	-1.29607						Klf16	0.00393595		SEMA7A	0.0221563		DHRS9	0.0228742
Ccl2	0.00317274	-3.15796		GREM2	0.149186	-1.27147						TMEM200A	0.00431452		IL17RA	0.0226935		NOP2	0.023542
IL18RAP	0.050482	-3.11563		KRT18	0.130076	-1.22019						F2RL1	0.00437523		SOCS6	0.0232828		PPARGC1B	0.0236992
DUSP4	0.00478268	-3.11152		DKK2	0.0414046	-1.18597						EREG	0.00443381		LIF	0.0238686		PIM3	0.027243
TMEM200A	0.00431452	-3.1099		VCAM1	0.0773931	-1.1202						Hmga2	0.00447299		GCNT4	0.0254523		FHL2	0.0278063
MYCT1	0.0780334	-3.02932		ANO1	0.871516	-1.11619						S1PR1	0.0044764		NXPH3	0.0255761		RND1	0.0282301
SPRY1	0.011646	-3.00906		Sprr2k	0.143337	-1.09291						NOC3L	0.00451263		Ankrd50	0.0256599		TSR1	0.0282879
C8orf4	0.0437481	-2.96008		CCND1	0.0331486	-1.08426						FKBP5	0.00458774		TNFAIP2	0.0267988		Pbp2	0.0294773
KCNK13	0.544601	-2.92609		F3	0.00173928	-1.08119						CTDP1	0.00466237		NT5DC3	0.0277244		APLN	0.0320118
TNFAIP3	0.272228	-2.83665		CH25H	0.147923	-1.05459						IFFO2	0.00466588		SRXN1	0.0303502		CCND1	0.0331486
UBASH3B	0.00738455	-2.80565		FGD3	0.0902979	-1.03797						DUSP4	0.00478268		PDK4	0.0324019		NGF	0.0348895
ERRFI1	0.0284602	-2.79872		SLC7A11	0.164148	-1.02173						RPF2	0.00497209		FOSB	0.0351975		QTRTD1	0.0354733
MEOX1	0.0684169	-2.7666		UPP1	0.124629	-1.00941						PTPN13	0.00498053		CAMK1D	0.0353762		TMEM173	0.0355515
PTPRE	0.00885047	-2.75377		Ccl2	0.037912	-0.992361						MERTK	0.00508015		KLF10	0.0356049		Ccl2	0.037912
GJB3	0.0485918	-2.75215		PLAU	0.0591704	-0.987639						ANKRD28	0.00519465		TTC9	0.0362852		TRMT10C	0.0391517
ZFP36L2	0.00241328	-2.72476		GLYAT	0.041469	-0.926819						TGFA	0.00568861		NIPAL1	0.0390974		MYCN	0.0392397
PHLDA1	0.00272657	-2.65701		ARSJ	0.115276	-0.90585						GCNT4	0.00600933		Nes	0.0401913		FHDC1	0.0394275
RGS20	N/A	-2.63608		KCNN4	0.98912	-0.892294						CCRN4L	0.00623627		Lce1h	0.0413336		9930111J21Rik1/Gm12185	0.0400198
GLYAT	0.00726926	-2.6251		Nolc1	0.40932	-0.845582						JADE2	0.00624111		FAM110C	0.0424007		MTMR10	0.0403841
RGS16	0.0305601	-2.60395		KCNF1	0.0679055	-0.834569						RCL1	0.00640058		PRKCA	0.0428078		DKK2	0.0414046
ANGPTL4	0.161124	-2.58275		MERTK	0.067566	-0.826632						ELK3	0.00645378		DUSP4	0.0428683		GLYAT	0.041469
IFI16	0.171581	-2.55538		NGF	0.0348895	-0.804803						ADAM19	0.00673157		EREG	0.0474452		ANKRD1	0.0443014
DUSP5	0.00942475	-2.54139		RRS1	0.0118614	-0.804013						BCL10	0.00678874		ZNF697	0.048455		TRIM16	0.0455098
Ccl7	0.142743	-2.51724		HK2	0.00509491	-0.790955						CAMK1D	0.00687615		SH3RF1	0.0485686		NAA25	0.0490869
FHDC1	0.0437842	-2.51653		CD34	0.276463	-0.769635						MTMR10	0.0069056		SPRY2	0.04931		NAF1	0.0526083
GCNT4	0.00600933	-2.48739		TM4SF1	0.10123	-0.748177						QTRTD1	0.00718631		DUSP5	0.0514591		F2RL1	0.0548215
MTMR10	0.0069056	-2.47214		TNFAIP3	N/A	-0.737175						GLYAT	0.00726926		RASA3	0.0543654		MAP3K6	0.0560083
MGP	0.0636109	-2.4522		MEGF10	0.119421	-0.734764						UBASH3B	0.00738455		PLAT	0.0570717		PLAU	0.0591704
Pbp2	0.0107503	-2.42277		MTMR10	0.0403841	-0.732564						SIPA1L3	0.00759114		ITGB3	0.0593051		RPF2	0.0613423
FOXS1	0.0710374	-2.41987		F2RL1	0.0548215	-0.726564						PHC2	0.00778746		ANKRD28	0.0596903		S1PR1	0.0618259
NAV3	0.00842581	-2.37634		NAV3	0.286183	-0.726047						SLC2A3	0.0079768		ANGPTL4	0.0616225		Klf16	0.0642661
BHLHE40	0.000275683	-2.37493		RPF2	0.0613423	-0.706474						NOP2	0.00798848		ADAM19	0.0641608		POLR3G	0.064289
MYC	0.0402939	-2.36343		ARHGAP22	0.307318	-0.704642						NAV3	0.00842581		F2R	0.0671488		SPRR1A	0.0650221
SPRY2	0.00312082	-2.34481		TMEM173	0.0355515	-0.687367						FAM110C	0.00850943		EEA1	0.0748024		MERTK	0.067566
NUAK2	N/A	-2.2944		SLC29A2	0.0922549	-0.675756						IL17RA	0.00878038		SOCS5	0.0749996		KCNF1	0.0679055
ENPP1	0.219224	-2.27277		CAV2	N/A	-0.673991						KLHDC8A	0.00881649		RIN1	0.0752767		FOXN2	0.069394
GJB2	0.200308	-2.26266		ATP8B1	0.263814	-0.661014						PTPRE	0.00885047		EGR3	0.0757612		SMIM15	0.0759477
NPTX1	0.220971	-2.23495		CHCHD4	0.0198851	-0.64554						DUSP6	0.00897393		NFKBIZ	0.0817751		VCAM1	0.0773931
CX3CL1	0.128379	-2.23086		PUS7	0.0031508	-0.62837						DUSP5	0.00942475		PTPN12	0.0822808		MEOX1	0.0789202
FOSL1	0.0402564	-2.21676		POLR1B	0.0160181	-0.624551						NIFK	0.00969714		BRINP1	0.0834632		MOB3A	0.0803818
TGFA	0.00568861	-2.20435		MPHOSPH10	0.0958471	-0.61031						P2RY2	0.00979754		DOCK5	0.0858823		URB2	0.0837667
LINGO2	0.314488	-2.19495		SPP1	N/A	-0.605281						DOCK5	0.00995405		RAP1GAP2	0.0859104		FLRT2	0.0839421
TM4SF1	0.0280033	-2.14664		MYC	0.0339356	-0.589354						MTAP	0.0100409		SERPINB2	0.0864785		NIFK	0.0848243
NGFR	0.214069	-2.14326		SLC2A1	0.00143016	-0.587251						VAV3	0.01031		C8orf4	0.0873489		CTGF	0.0850654
VAV3	0.01031	-2.12928		CMTR2	0.00789741	-0.581916						TMEM173	0.0104274		EGR1	0.087514		LITAF	0.0875835
HMGA1	N/A	-2.11355		FHL2	0.0278063	-0.580258						CCND1	0.0104349		HOMER1	0.087854		HTR2A	0.0886214
CCND1	0.0104349	-2.10729		GRWD1	0.00933554	-0.577771						Pbp2	0.0107503		DMP1	0.089939		ADAMTS8	0.08986
EPS8	N/A	-2.04633		NOP58	0.0072887	-0.568943						PPARGC1B	0.0112557		DUSP6	0.0936644		FGD3	0.0902979
EREG	0.00443381	-2.03323		ALDH1A3	0.431438	-0.55838						HBEGF	0.0115446		KCNK3	0.0950528		CRCT1	0.0904423
PPAP2B	0.00385072	-2.00623		SPRY1	0.0960785	-0.545192						SPRY1	0.011646					JADE2	0.0921632
CH25H	0.0895183	-1.9917		HMGA1	N/A	-0.537372						TNFAIP2	0.0123443					SLC29A2	0.0922549
TMEM173	0.0104274	-1.97522		RGS20	N/A	-0.533098						SOCS5	0.0124089					MAT2A	0.0925243
Nefm	0.167943	-1.96427		JADE2	0.0921632	-0.526499						TOMM70A	0.0128535					MPHOSPH10	0.0958471
SLC2A3	0.0079768	-1.96022		RND1	0.0282301	-0.515378						TRMT10C	0.0129434					SPRY1	0.0960785
RASA3	0.00131575	-1.95295		RSL1D1	0.0181086	-0.513179						TSR1	0.0130749					ATP1B1	0.0973923
GALNT3	0.0260662	-1.93406		PFKFB3	2.97326e-05	-0.509526						NAF1	0.0131849					VAV3	0.098641
SH2D5	0.0409065	-1.92877		ITGA4	0.335608	-0.500894						TUBA1C	0.0132761
SPRED1	N/A	-1.91252		RCL1	0.00739991	-0.500434						IER2	0.0134219
DOK1	0.0156108	-1.89653		FHDC1	0.0394275	-0.499087						MPHOSPH10	0.0135183
HBEGF	0.0115446	-1.89391		CTGF	0.0850654	-0.497861						EVA1A	0.0136433
KCTD11	0.0031262	-1.89232		TUBA1C	0.0044101	-0.489256						MDN1	0.0142283
HIVEP3	0.0326736	-1.87882		DAPK2	0.130072	-0.48656						LBH	0.0145865
UPP1	0.0857927	-1.87286		PLK2	0.202398	-0.486344						HEATR1	0.0147016
IER2	0.0134219	-1.84301		LITAF	0.0875835	-0.48631						FGD6	0.0149826
RBPJ	0.0513831	-1.84112		TRMT10C	0.0391517	-0.478187						MYCN	0.0151739
FAM84B	0.0282097	-1.81318		LRRC32	0.247992	-0.473799						DOK1	0.0156108
SYNJ2	N/A	-1.81207		SLC16A1	0.00301947	-0.467868						MAFF	0.0156377
Sprr2k	0.0851441	-1.80567		WDR43	0.0134813	-0.448642						RSL1D1	0.0160284
ANKH	0.0952604	-1.80259		NOL10	0.119957	-0.434796						PLK3	0.0163445
TMCC3	N/A	-1.79698		Pwp2	0.0217248	-0.432135						RASA1	0.0165006
TFPI2	0.0184834	-1.79392		TRIM16	0.0455098	-0.409126						CMTR2	0.0168642
VCAM1	0.0408175	-1.77334		TFPI2	0.403122	-0.404708						KLF10	0.0182486
SEMA6D	0.495025	-1.77063		SYNJ2	N/A	-0.40308						DAPK2	0.018378
DOCK4	0.000808792	-1.75109		LRRC8D	0.0154595	-0.396761						TFPI2	0.0184834
TMEM171	0.282976	-1.75049		PIM3	0.027243	-0.39249						FBXO28	0.0185947
GCNT2	N/A	-1.69577		GJB3	0.164924	-0.386926						PTPN12	0.0186681
TUBA8	0.249429	-1.69435		GFOD1	0.280474	-0.382588						MEGF10	0.0189665
P2RY2	0.00979754	-1.69393		NOP2	0.023542	-0.374565						FOSB	0.0190048
S100a7a	0.132378	-1.68337		EIF1AX	0.00455856	-0.372502						FHL2	0.019335
IL34	0.0790757	-1.66499		BCAR3	0.528423	-0.371555						WDR43	0.019446
TNFSF18	0.15231	-1.65158		TSR1	0.0282879	-0.371199						EMP1	0.0195234
MAFF	0.0156377	-1.64838		SMIM15	0.0759477	-0.359662						Pwp2	0.0195801
MAP3K6	0.0199666	-1.64702		PARD6B	0.188176	-0.359051						F2R	0.0196947
POLR3G	0.0704258	-1.63232		MAP3K6	0.0560083	-0.352921						TWISTNB	0.0198894
SIPA1L3	0.00759114	-1.62344		NIFK	0.0848243	-0.352547						MAP3K6	0.0199666
MAST4	0.00123222	-1.61673		MTAP	0.137957	-0.350181						NMT2	0.0202183
FAM110C	0.00850943	-1.58052		QTRTD1	0.0354733	-0.338776						SLC25A30	0.0219203
SGK1	N/A	-1.57377		DDX21	0.0196427	-0.336554						RND1	0.0226477
ITGA4	0.047731	-1.55753		Dynap	0.533912	-0.331996						Slfn2	0.0238231
PKP1	0.168592	-1.5293		LRRFIP1	0.249947	-0.329787						RAI14	0.0239958
PLK3	0.0163445	-1.52381		MOB3A	0.0803818	-0.322175						RRS1	0.0239964
ADORA2B	0.109196	-1.49537		CIRH1A	0.0179071	-0.316101						CIRH1A	0.0243078
SOCS5	0.0124089	-1.47717		NAA25	0.0490869	-0.30446						HK2	0.0252102
KCNF1	0.0411987	-1.46797		DYRK3	0.105429	-0.297891						IPO7	0.0255818
SLC14A1	0.136009	-1.46426		EVA1A	0.323909	-0.290562						SH3RF1	0.0255951
LBH	0.0145865	-1.43124		LYAR	0.965762	-0.282571						TRIB1	0.0258317
FLT4	0.109434	-1.42486		PTPRE	0.246376	-0.273726						URB2	0.0259554
RCL1	0.00640058	-1.41913		S1PR1	0.0618259	-0.270213						GALNT3	0.0260662
STC1	0.225158	-1.39218		NOL9	0.00203116	-0.258056						DYRK3	0.0260996
ITGB3	0.128377	-1.38623		RCC1	0.0166896	-0.25307						GRWD1	0.0272479
PUS7	2.08735e-05	-1.381		FLRT2	0.0839421	-0.246842						ZNF697	0.0274938
CCRN4L	0.00623627	-1.38023		NAF1	0.0526083	-0.240225						TM4SF1	0.0280033
ADAMTS8	0.127027	-1.36508		ATP1B1	0.0973923	-0.235614						FAM84B	0.0282097
GREM2	0.166887	-1.34125		NUAK2	N/A	-0.225272						EGR1	0.0282439
C12orf45	0.00148025	-1.3393		ADORA2B	0.430656	-0.225235						SLC2A1	0.0282548
DIMT1	0.0032403	-1.319		SIPA1L3	0.288849	-0.22412						ERRFI1	0.0284602
JUNB	0.000395836	-1.29803		KATNBL1	0.6452	-0.214843						APLN	0.0290073
ANKRD1	0.112386	-1.29784		Hmga2	0.149815	-0.213843						SLC16A1	0.0292354
KCNN4	0.453948	-1.27862		NABP1	0.264392	-0.212777						Ankrd50	0.0296722
ELK3	0.00645378	-1.2738		BDNF	N/A	-0.211753						EGR2	0.0301139
FGD6	0.0149826	-1.24181		DIMT1	0.972801	-0.209592						ARC	0.0303761
EMP1	0.0195234	-1.23395		NMD3	0.114586	-0.203329						RGS16	0.0305601
S1PR1	0.0044764	-1.2336		GEMIN5	0.945098	-0.202919						HIVEP3	0.0326736
LIF	0.00148692	-1.23048		TWISTNB	0.336327	-0.194725						SGMS2	0.0331533
PTPN13	0.00498053	-1.22923		MAT2A	0.0925243	-0.191673						SLC29A2	0.0339822
SLC4A7	0.000274114	-1.22613		TEAD4	0.00621658	-0.186476						LARP4	0.0361459
Nes	0.081037	-1.21916		Zfp52	0.964791	-0.179877						FOSL1	0.0402564
Nolc1	0.0697227	-1.21749		TAF4B	0.00540745	-0.176845						IL4R	0.0404652
DHRS9	0.189577	-1.20358		TOMM70A	0.0143808	-0.175087						VCAM1	0.0408175
DOCK5	0.00995405	-1.19902		SLC20A1	N/A	-0.156207						SH2D5	0.0409065
KLF10	0.0182486	-1.19432		NREP	N/A	-0.152486						KCNF1	0.0411987
TNFAIP2	0.0123443	-1.17548		FOXN2	0.069394	-0.151677						RAP1GAP2	0.0428132
CD34	0.191954	-1.17422		ETV4	0.400914	-0.151103						C8orf4	0.0437481
TGIF1	N/A	-1.17388		LRRN4CL	0.617225	-0.150703						FHDC1	0.0437842
OSBPL3	0.0512942	-1.15465		TMEM200A	0.217289	-0.14961						TIAM2	0.0443012
POLR1B	0.00266152	-1.14695		RIOK2	0.205925	-0.148844						EGR3	0.0462788
ANKRD28	0.00519465	-1.14557		URB2	0.0837667	-0.147545						TP53BP2	0.0465431
ELFN1	0.125846	-1.11368		HEATR1	0.275216	-0.146401						SEMA4B	0.0466419
VGF	0.172516	-1.11062		ELK3	0.284018	-0.142791						ARL4C	0.0471498
F2R	0.0196947	-1.09801		STC1	0.761773	-0.142701						ITGA4	0.047731
RASSF5	0.109303	-1.09374		LARP4	0.260523	-0.136581						CHCHD4	0.0485844
RAP1GAP2	0.0428132	-1.09311		SERPINE1	0.370018	-0.133507						GJB3	0.0485918
MDN1	0.0142283	-1.08845		Klf16	0.0642661	-0.132765						IL18RAP	0.050482
RND1	0.0226477	-1.08674		RBPJ	0.0033792	-0.129429						SOAT1	0.0506706
9930111J21Rik1/Gm12185	0.0829508	-1.08564		GTPBP4	0.826814	-0.128849						Lce1h	0.0509651
IFFO2	0.00466588	-1.06215		PWWP2B	0.566276	-0.125227						OSBPL3	0.0512942
PDK4	0.119701	-1.06046		URB1	0.166938	-0.124598						RBPJ	0.0513831
RNF39	0.0547491	-1.06034		SPRY4	0.183083	-0.123813						SPRR1A	0.0518851
GRAMD4	0.104511	-1.06005		Nefm	0.943044	-0.121549						RNF39	0.0547491
EPHA2	0.0554143	-1.05977		TIAM2	0.866868	-0.11922						EPHA2	0.0554143
BCL10	0.00678874	-1.05605		UGCG	0.144073	-0.114922						MAT2A	0.0554226
Dynap	0.198045	-1.05116		NUP153	0.324744	-0.103913						SPHK1	0.0611356
ITGA3	0.139549	-1.04511		ITGA3	0.702426	-0.0930556						AREG	0.0617863
SPHK1	0.0611356	-1.04013		CYR61	0.251688	-0.0895227						MGP	0.0636109
RRS1	0.0239964	-1.03285		SLC25A32	0.100504	-0.0862484						PTGS2	0.0636206
PHC2	0.00778746	-1.02874		KLHDC8A	0.562783	-0.085138						MEOX1	0.0684169
ARNTL	0.272228	-1.02538		NOC3L	0.332	-0.0830116						CCNYL1	0.0694168
RASA1	0.0165006	-1.02426		FOS	0.791719	-0.0814162						Nolc1	0.0697227
GFPT2	0.0986033	-1.02392		EPHA2	0.497023	-0.0748196						POLR3G	0.0704258
FKBP5	0.00458774	-1.02036		IFRD1	0.725924	-0.0708897						FOXS1	0.0710374
RAI14	0.0239958	-1.01271		S100a7a	0.786129	-0.0655583						LRRC8C	0.072386
DYRK3	0.0260996	-1.00926		RRAS2	0.31689	-0.0652711						RIOK2	0.0736244
Zfp52	0.17964	-1.00515		ESF1	0.267826	-0.0640497						TNFSF11	0.0739012
CYTH3	N/A	-1.00102		OTUD4	0.205106	-0.0528145						URB1	0.0739643
FLRT2	0.000235045	-0.990809		FLT4	0.808776	-0.052805						CNNM4	0.074596
PIM3	0.00152535	-0.986925		OSBPL3	0.649256	-0.0486411						SDC4	0.0746009
NOC3L	0.00451263	-0.982976		C12orf45	0.449984	-0.0393497						SIPA1L2	0.0749327
TEAD4	0.786856	-0.974628		Pvr	0.894267	-0.037922						NAA25	0.0756569
SLC25A30	0.0219203	-0.96528		SLC2A3	0.411399	-0.0298343						CYR61	0.077667
NREP	N/A	-0.952006		TSKU	0.660764	-0.0281432						MYCT1	0.0780334
TTC9	0.144237	-0.942101		MDN1	0.958318	-0.022399						IL34	0.0790757
ARSJ	0.0885767	-0.94156		FOSL1	0.992478	-0.0183722						PARD6B	0.0791431
GRWD1	0.0272479	-0.939126		VAV3	0.098641	-0.0143585						CTTNBP2NL	0.0800678
RSL1D1	0.0160284	-0.925777		DOCK4	0.840936	-0.013396						Nes	0.081037
TRIB1	0.0258317	-0.898421		RGS16	0.980657	-0.00509333						KLF13	0.0824085
IL1R1	0.583933	-0.896479		PLAUR	0.409513	-0.0040035						ROCK2	0.0827808
F3	0.00155132	-0.88698		RAI14	0.654896	-0.000147172						9930111J21Rik1/Gm12185	0.0829508
NIFK	0.00969714	-0.883309		EAF1	0.394864	0.00110932						SOWAHC	0.0839781
CAV2	N/A	-0.881284		FMN1	N/A	0.00841395						Sprr2k	0.0851441
IL4R	0.0404652	-0.872588		TBC1D1	0.00172349	0.00886993						UPP1	0.0857927
Ivl	0.715748	-0.871517		RASSF5	0.837687	0.0142008						ARSJ	0.0885767
CMTR2	0.0168642	-0.863833		NOL8	0.00115216	0.0172342						CH25H	0.0895183
MTAP	0.0100409	-0.863631		BCL10	0.341858	0.0188108						EIF1AX	0.0945209
GEMIN5	0.359187	-0.862562		PLA2G4A	0.827519	0.021593						ANKH	0.0952604
KRT18	0.425717	-0.859849		KCTD11	0.54524	0.0233969						SEMA7A	0.0964898
CHCHD4	0.0485844	-0.840129		P2RY2	0.655281	0.0234152						GFPT2	0.0986033
TAF4B	0.000239355	-0.838893		STK40	N/A	0.0456507						ETV1	0.0986287
NOL9	0.000230114	-0.826968		FGD6	0.87854	0.0456585						OTUD4	0.0990563
DDX21	0.0038402	-0.824882		ADAM19	0.0641608	0.0520225
MEDAG	0.131181	-0.816132		LFNG	0.609909	0.0522934
CFLAR	N/A	-0.813742		ARL4C	0.643368	0.0543465
HEATR1	0.0147016	-0.812931		BHLHE40	0.905256	0.0548127
HTR2A	0.231423	-0.802211		IPO7	0.294067	0.0662696
RPF2	0.00497209	-0.801151		GFPT2	0.735916	0.069675
TP53BP2	0.0465431	-0.800808		MAP2K3	0.903081	0.0805649
STK40	N/A	-0.795677		CCNYL1	0.0151224	0.0820624
PFKFB3	0.272228	-0.793887		DOK1	0.815544	0.0866416
SLC29A2	0.0339822	-0.791812		SOAT1	0.271306	0.0901312
MTCL1	N/A	-0.788275		SLC4A7	0.605723	0.104641
TIAM2	0.0443012	-0.783604		ZFP36L2	0.643818	0.122361
ARL4C	0.0471498	-0.782836		CAMK1D	0.0353762	0.122971
Pwp2	0.0195801	-0.780844		SMIM3	0.810977	0.12469
NOP2	0.00798848	-0.776632		CTDP1	0.175243	0.125852
SIPA1L2	0.0749327	-0.755733		SNX9	0.0203412	0.127155
LRRC8C	0.072386	-0.751562		RAB23	N/A	0.128883
OAF	0.101901	-0.749187		CDK18	0.74677	0.140567
NOL10	0.000382336	-0.746571		SHISA6	0.905678	0.142711
TEC	0.139188	-0.74593		PHLDA1	0.938893	0.153981
FOSB	0.0190048	-0.733764		TJP2	0.294761	0.154781
Ankrd50	0.0296722	-0.729995		CDK17	0.65829	0.160178
ZNF697	0.0274938	-0.720941		TNFSF11	0.447504	0.164244
MPHOSPH10	0.0135183	-0.707042		ZAK	0.225166	0.16968
PLAT	0.302277	-0.706228		FAM167A	0.848859	0.184722
CTGF	0.115448	-0.701083		MAST4	0.496222	0.191704
SNX9	0.107159	-0.696485		TMCC3	N/A	0.205295
LITAF	0.107158	-0.694495		Sacs	0.64777	0.216229
PTGS2	0.0636206	-0.687676		ABL2	0.409481	0.220664
TNFSF11	0.0739012	-0.681784		MEDAG	0.444874	0.223887
HK2	0.0252102	-0.672935		ARF6	0.476228	0.227728
FGD3	0.211631	-0.668747		PHC2	0.139196	0.232031
Klf16	0.00393595	-0.666484		CD44	N/A	0.232245
SMIM3	0.126052	-0.659627		DUSP10	0.720672	0.235083
TWISTNB	0.0198894	-0.65859		SOCS6	0.0232828	0.237408
PLA2G4A	0.112161	-0.6489		EPS8	N/A	0.238273
IQGAP2	0.303981	-0.645148		MAFF	0.274351	0.263956
CNNM4	0.074596	-0.641668		PTPN12	0.0822808	0.268343
LYAR	0.212171	-0.640564		TRIB1	0.562357	0.275979
CYR61	0.077667	-0.63701		LRRC8C	0.135095	0.276711
CTTNBP2NL	0.0800678	-0.634969		RIN1	0.0752767	0.279086
SEMA4B	0.0466419	-0.631389		SLC30A4	0.192553	0.282716
IL17RA	0.00878038	-0.629653		BDP1	0.00707974	0.288632
SH3RF1	0.0255951	-0.619917		OAF	0.471868	0.292337
SGMS2	0.0331533	-0.613859		PTGS1	0.629491	0.303814
PWWP2B	0.118772	-0.611051		PLK3	0.595202	0.30581
WDR43	0.019446	-0.60877		SMURF2	0.102206	0.305826
NAF1	0.0131849	-0.607942		CNNM4	0.180565	0.30885
CDK18	0.166014	-0.603096		PTGS2	0.250412	0.310248
ALDH1A3	0.502982	-0.600629		TNFRSF12A	N/A	0.310829
SDC4	0.0746009	-0.596479		IL17RA	0.0226935	0.314138
NXPH3	0.429553	-0.589669		FBXO28	0.152685	0.318562
QTRTD1	0.00718631	-0.589399		ARNTL	N/A	0.320732
OTUD4	0.0990563	-0.584552		ETV5	0.0070845	0.328684
URB1	0.0739643	-0.581047		SEMA4B	0.223969	0.328762
LRRC8D	7.94528e-05	-0.570442		ITGA6	N/A	0.329049
FBXO28	0.0185947	-0.569812		LBH	0.449704	0.330667
CTDP1	0.00466237	-0.564125		IL1RL1	0.631859	0.330846
PPM1J	0.425473	-0.560509		EGR2	0.659979	0.341681
FHL2	0.019335	-0.554229		PRKCA	0.0428078	0.35636
URB2	0.0259554	-0.543354		TGIF1	N/A	0.37907
CRCT1	0.262639	-0.537686		ELFN1	0.517699	0.384978
NAA25	0.0756569	-0.537072		RASA1	0.162087	0.390478
TRMT10C	0.0129434	-0.52837		GCNT2	N/A	0.394939
BDNF	N/A	-0.525323		NMT2	0.149539	0.401616
ANO1	0.693394	-0.521197		SSTR2	0.422927	0.404963
NOP58	0.243869	-0.503591		EHD4	0.0161205	0.409002
FOXG1	0.105798	-0.500178		ROCK2	0.0035725	0.422348
SLC16A1	0.0292354	-0.496559		RNF39	0.792922	0.429792
BCAR3	0.348222	-0.490531		FOXG1	0.178604	0.441061
ADAM19	0.00673157	-0.4851		SOCS5	0.0749996	0.44638
TSR1	0.0130749	-0.481966		RGS17	0.495025	0.451307
BDKRB2	0.177479	-0.477363		NT5DC3	0.0277244	0.453257
SOWAHC	0.0839781	-0.472813		MMP13	0.71605	0.461795
PARD6B	0.0791431	-0.462859		HECTD2	0.68387	0.473286
SHISA6	0.323034	-0.446712		B3GNT2	0.495025	0.475007
CD44	N/A	-0.441748		LIF	0.0238686	0.478985
EAF1	0.000164843	-0.431583		Nes	0.0401913	0.486712
CIRH1A	0.0243078	-0.420458		TGFA	0.28572	0.487803
NFE2L2	0.406331	-0.416996		CCRN4L	0.402876	0.492865
ATP8B1	0.449584	-0.415558		Nppb	0.719635	0.498613
KIF2A	0.131884	-0.398636		DUSP1	0.134237	0.50657
KITLG	0.330378	-0.398247		SOWAHC	0.00736449	0.512374
GTPBP4	0.190585	-0.398023		SH2D5	0.152819	0.522694
NMT2	0.0202183	-0.382628		SH3RF1	0.0485686	0.524985
PTPN12	0.0186681	-0.380644		EMP1	0.00564131	0.530379
NIPAL1	0.276245	-0.379815		ETV1	0.00136049	0.531571
KATNBL1	0.151318	-0.378685		IER2	0.342202	0.54326
Nppb	0.760868	-0.377391		KIF2A	0.00995185	0.545739
IPO7	0.0255818	-0.374897		BDKRB2	0.228709	0.548339
RIOK2	0.0736244	-0.359763		Ankrd50	0.0256599	0.551096
RGS17	0.495025	-0.351481		EXT1	0.111121	0.554901
ARF6	0.105232	-0.351462		MICAL2	N/A	0.562102
FOXN2	0.110486	-0.345869		KLF10	0.0356049	0.573398
TOMM70A	0.0128535	-0.337981		ANKRD28	0.0596903	0.576515
EIF1AX	0.0945209	-0.336403		NPTX1	0.577271	0.582476
NOL8	0.398851	-0.33008		TP53BP2	0.0218731	0.583336
SLC25A32	0.128561	-0.328517		CFLAR	N/A	0.589627
MAP2K3	0.205338	-0.326937		SPRY2	0.04931	0.595524
MAT2A	0.0554226	-0.326517		RASA3	0.0543654	0.596601
ESF1	0.344862	-0.32371		IFFO2	0.0110885	0.604208
MICAL2	N/A	-0.322411		Ivl	0.167294	0.604881
CAMK1D	0.00687615	-0.322269		EEA1	0.0748024	0.610006
PLK2	0.433407	-0.315839		RAP1GAP2	0.0859104	0.612087
TJP2	0.949575	-0.315028		PKP1	0.260881	0.614606
ROCK2	0.0827808	-0.308213		GCNT4	0.0254523	0.615862
SOCS6	0.660293	-0.302814		CTTNBP2NL	0.0160497	0.616876
MOB3A	0.12549	-0.302037		ZNF697	0.048455	0.619155
ST3GAL1	0.234385	-0.275545		CX3CL1	0.343003	0.632107
PRKCA	0.240969	-0.27385		IL34	0.463484	0.633022
PLEC	N/A	-0.273267		FOXS1	0.367645	0.634784
OTUD7A	0.462206	-0.272649		ERRFI1	0.12763	0.652844
ITGA6	0.272228	-0.259255		MGP	0.496835	0.655113
SLC2A1	0.0282548	-0.255629		ST3GAL1	0.113575	0.661004
LARP4	0.0361459	-0.255399		IER3	0.252021	0.663555
HIVEP2	0.533813	-0.253345		AREG	0.139231	0.665074
KLF13	0.0824085	-0.25295		NFE2L2	0.00810646	0.666794
TRIM16	0.632867	-0.236668		TIPARP	0.264122	0.677525
PTGS1	0.567451	-0.23568		DOCK5	0.0858823	0.68506
ADAM12	0.80008	-0.228673		JUNB	0.103159	0.685341
LRRFIP1	0.963388	-0.218206		KLF13	0.237937	0.686166
B3GNT2	0.357893	-0.188778		ANKH	0.355182	0.69346
ABL2	0.309101	-0.18082		SGMS2	0.15241	0.713131
SOAT1	0.0506706	-0.176717		SPRED1	N/A	0.714276
SERPINE1	0.591958	-0.172802		FAM110C	0.0424007	0.727652
TUBA1C	0.0132761	-0.157669		FKBP5	0.00306785	0.736396
CDK17	0.19198	-0.151025		SPHK1	0.0054198	0.746899
HOMER1	0.180294	-0.147174		NGEF	N/A	0.752844
SMURF2	0.263598	-0.143513		TUBA8	0.385251	0.758004
DKK2	0.973319	-0.127909		PTPN13	0.00124088	0.758128
SFN	0.893788	-0.126415		HOMER1	0.087854	0.773142
SMIM15	0.39032	-0.120566		FOSB	0.0351975	0.785437
NMD3	0.920178	-0.0938229		NGFR	0.351967	0.792356
PLAUR	0.679383	-0.0933538		SLC14A1	0.17363	0.793864
CCNYL1	0.0694168	-0.0907279		DUSP5	0.0514591	0.794005
EXT1	0.731461	-0.0879715		ADAM12	0.269278	0.794054
TNFRSF12A	N/A	-0.0654013		F2R	0.0671488	0.796212
LFNG	0.325829	-0.0614264		CYTH3	N/A	0.802256
MMP13	0.981024	-0.0577212		KITLG	0.181759	0.802946
KCNK3	0.678255	-0.0536743		SERPINB2	0.0864785	0.806685
IL11	0.924274	-0.0381112		NFKBIZ	0.0817751	0.808873
SYNE3	0.158891	-0.0321637		JUN	0.0201242	0.81747
BDP1	0.106095	-0.02996		IL1R1	0.195681	0.821273
NRP1	0.939975	-0.0222467		ARID5A	0.0143331	0.829325
TBC1D1	0.00125911	-1.766		ARC	0.862837	0.85463
EEA1	0.447571	-0.00335432		EREG	0.0474452	0.858778
RIN1	0.808977	-0.00106659		PLEC	N/A	0.866123
NUP153	0.834015	0.00389186		PPAP2B	0.00316984	0.870573
SLC20A1	N/A	0.0102316		GRAMD4	0.869229	0.89811
HECTD2	0.819317	0.0138999		HIVEP2	0.0055844	0.89907
SLC7A11	0.164115	0.0205263		DUSP4	0.0428683	0.908613
ARHGAP22	0.900969	0.0324702		AQP5	0.552975	0.912527
ATP1B1	0.665838	0.0704226		UGDH	0.0153437	0.932861
TSKU	0.133632	0.0779463		NRP1	0.129542	0.950627
FMN1	N/A	0.113004		MYLK2	0.207475	0.95512
LRRC32	0.811918	0.114219		VGF	0.214323	0.964144
NT5DC3	0.937502	0.12111		TEC	0.272561	0.977404
ZAK	0.465438	0.121403		IL4R	0.154641	0.989495
Pvr	0.540467	0.127388		NR4A1	0.191754	1.01397
IER3	0.877393	0.146942		ENPP1	0.283434	1.03953
EHD4	0.258142	0.147737		HIVEP3	0.0128768	1.04808
RRAS2	0.913194	0.147898		HBEGF	0.0127342	1.05709
SLC30A4	0.994209	0.160102		SGK1	N/A	1.06212
IL1RL1	0.937078	0.17942		TTC9	0.0362852	1.06381
ARID5A	0.203016	0.205952		SEMA6D	0.495025	1.06525
IFRD1	0.322726	0.22282		DUSP6	0.0936644	1.07901
RCC1	0.698169	0.241491		SYNE3	0.00561936	1.09056
UGDH	0.352985	0.257965		GCNT1	0.246491	1.16525
NGF	0.643057	0.273791		KCNK3	0.0950528	1.16528
SRXN1	0.549954	0.280229		SLC25A30	0.00115274	1.22806
Sacs	0.25967	0.30137		SDC4	0.00710235	1.30871
SLCO4A1	0.705679	0.317915		VASN	0.00927125	1.31394
CLDN4	0.830019	0.380481		C8orf4	0.0873489	1.33635
VASN	0.266935	0.421623		PDK4	0.0324019	1.34222
FAM167A	0.492111	0.459561		ITGB3	0.0593051	1.34742
NFKBIZ	0.189438	0.517106		RCAN1	0.648385	1.39673
UGCG	0.0924674	0.520511		NIPAL1	0.0390974	1.40365
PLAU	0.444442	0.521359		MTCL1	N/A	1.42672
GFOD1	0.609897	0.52292		SRXN1	0.0303502	1.46585
NR4A1	0.0474963	0.593463		IQGAP2	0.201705	1.47401
NGEF	N/A	0.624204		EGR1	0.087514	1.54132
JUN	0.0190522	0.672086		SLCO4A1	0.313148	1.58814
DUSP1	0.00401942	0.677541		TNFAIP2	0.0267988	1.644
RAB23	N/A	0.729713		IL11	0.136645	1.65867
TIPARP	0.324536	0.730418		PLAT	0.0570717	1.67778
NABP1	0.381861	0.757761		EGR3	0.0757612	1.80216
BRINP1	0.297228	0.929107		PPM1J	0.00329603	1.8322
WNT7A	0.369989	1.11694		DMP1	0.089939	1.84862
DUSP10	0.00316393	1.38683		ANGPTL4	0.0616225	1.87234
LRRN4CL	0.104642	1.39445		SIPA1L2	0.0187976	1.95102
RCAN1	0.571552	1.452		BRINP1	0.0834632	2.07671
GCNT1	0.246491	1.60355		OTUD7A	0.300537	2.25774
MYLK2	0.00330305	1.88104		SEMA7A	0.0221563	2.27203
AQP5	0.0801008	2.48716		NXPH3	0.0255761	3.11953
IL1RN	N/A	#NUM!		Lce1h	0.0413336	#NUM!
