# Supplementary material for: Receptor tyrosine kinases modulate distinct transcriptional programs by differential usage of intracellular pathways
Source: eLife. 2015 May 7;4:e07186. doi: 10.7554/eLife.07186 (PMC4450512; doi:10.7554/eLife.07186)
Supplement: Supplementary file 4. — Compiled gene ontology analysis. DOI: http://dx.doi.org/10.7554/eLife.07186.017 [file elife07186s004.xlsx]

## Sheet: FIg. S1D_1hrUp_DAVIDmf
1 hr PDGF up	Count	%	PValue	Genes
GO:0003677~DNA binding	26	28.2609	2.89e-07	FOSL2, CITED2, BHLHE40, NFIL3, MYC, EGR1, MAFF, KLF6, HIST1H2BC, EGR3, EGR2, HIST1H1D, EGR4, SMAD7, KLF10, ARID5A, MND1, NR4A1, FOSB, NPAS4, NR4A3, JUNB, HES1, ATF3, JUN, CSRNP1
GO:0030528~transcription regulator activity	20	21.7391	2.23e-06	EGR1, MAFF, KLF6, FOSL2, EGR2, SMAD7, NR4A1, FOSB, ANKRD1, NR4A3, NPAS4, JUNB, CITED2, HES1, ATF3, CSRNP1, JUN, BHLHE40, NFIL3, MYC
GO:0003700~transcription factor activity	16	17.3913	2.81e-06	EGR1, MAFF, KLF6, EGR2, FOSL2, SMAD7, NR4A1, NR4A3, FOSB, JUNB, CITED2, ATF3, CSRNP1, JUN, NFIL3, MYC
GO:0003676~nucleic acid binding	28	30.4348	0.000271	FOSL2, TIPARP, CITED2, BHLHE40, NFIL3, MYC, EGR1, KLF6, MAFF, HIST1H2BC, EGR3, TTC14, EGR2, HIST1H1D, EGR4, SMAD7, KLF10, ARID5A, MND1, NR4A1, FOSB, NPAS4, NR4A3, JUNB, HES1, ATF3, JUN, CSRNP1
1 hr FGF up	Count	%	PValue	Genes
GO:0030528~transcription regulator activity	34	31.4815	6.64e-14	FOSL2, ANKRD1, SRF, CITED2, FOS, BHLHE40, SKIL, NFIL3, MYC, FOSL1, SERTAD1, EGR1, KLF6, MAFF, EGR2, CEBPB, KLF9, SMAD7, KLF16, NR4A1, IRF2BP2, FOSB, NR4A3, MAFK, JUNB, MYCN, HES1, ATF3, JUN, CSRNP1, NAB2, MNT, TGIF1, KLF4
GO:0003700~transcription factor activity	26	24.0741	4.77e-12	FOSL2, SRF, CITED2, FOS, NFIL3, MYC, FOSL1, EGR1, MAFF, KLF6, EGR2, CEBPB, SMAD7, KLF16, NR4A1, NR4A3, FOSB, MAFK, JUNB, MYCN, ATF3, JUN, CSRNP1, MNT, TGIF1, KLF4
GO:0003677~DNA binding	37	34.2593	2.74e-11	FOSL2, SRF, CITED2, FOS, ZFP36L2, BHLHE40, NFIL3, FOSL1, MYC, EGR1, ZFP36, KLF6, MAFF, EGR3, EGR2, HIST1H1D, CEBPB, KLF9, EGR4, SMAD7, KLF10, ARID5A, KLF16, NR4A1, ARID3B, FOSB, NR4A3, MAFK, JUNB, MYCN, HES1, ATF3, JUN, CSRNP1, MNT, TGIF1, KLF4
GO:0043565~sequence-specific DNA binding	17	15.7407	2.63e-07	MAFF, CEBPB, FOSL2, NR4A1, FOSB, NR4A3, MAFK, SRF, JUNB, FOS, ATF3, JUN, TGIF1, NFIL3, MYC, FOSL1, KLF4
GO:0017017~MAP kinase tyrosine/serine/threonine phosphatase activity	5	4.62963	6.47e-07	DUSP5, DUSP4, DUSP1, DUSP10, DUSP6
GO:0003676~nucleic acid binding	37	34.2593	1.52e-05	FOSL2, SRF, CITED2, FOS, ZFP36L2, BHLHE40, NFIL3, FOSL1, MYC, EGR1, ZFP36, KLF6, MAFF, EGR3, EGR2, HIST1H1D, CEBPB, KLF9, EGR4, SMAD7, KLF10, ARID5A, KLF16, NR4A1, ARID3B, FOSB, NR4A3, MAFK, JUNB, MYCN, HES1, ATF3, JUN, CSRNP1, MNT, TGIF1, KLF4
GO:0016564~transcription repressor activity	9	8.33333	4.75e-05	HES1, ATF3, NAB2, TGIF1, IRF2BP2, BHLHE40, ANKRD1, SKIL, KLF4
GO:0008138~protein tyrosine/serine/threonine phosphatase activity	5	4.62963	8.53e-05	DUSP5, DUSP4, DUSP1, DUSP10, DUSP6
GO:0046983~protein dimerization activity	10	9.25926	0.000248	FOS, ATF3, FOSL2, CEBPB, JUN, NR4A1, FOSB, NFIL3, FOSL1, JUNB

## Sheet: Fig2B_4hr_DEgenes_DAVIDmf
4 hr FGF, molecular function	Count	%	PValue	Genes
GO:0005154~epidermal growth factor receptor binding	5	1.31926	2.07e-05	VAV3, EREG, TGFA, HBEGF, SOCS5
GO:0004672~protein kinase activity	29	7.65172	3.09e-05	CDK17, NRP1, CDK18, NUAK2, PRKG2, RIOK2, TRIB1, MAP3K6, STK40, TGFA, DYRK3, TEC, PRKCA, SGK1, ROCK2, FLT4, MAP2K3, PDK4, MYLK2, PIM3, DAPK2, EPHA2, MAST4, CCND1, PLK3, PLK2, MERTK, ABL2, CAMK1D
GO:0030695~GTPase regulator activity	21	5.5409	6.39e-05	NGEF, VAV3, SIPA1L2, IQGAP2, RGS17, CYTH3, DOCK5, RGS16, RCC1, DOCK4, ARHGAP22, RGS20, TIAM2, RIN1, RAP1GAP2, RASA3, TBC1D1, FGD6, FGD3, RASA1, BCAR3
GO:0033549~MAP kinase phosphatase activity	5	1.31926	7.74e-05	DUSP5, DUSP4, DUSP1, DUSP10, DUSP6
4 hr PDGF, molecular function	Count	%	PValue	Genes
GO:0005515~protein binding	121	39.6721	0.000111	MEF2C, SLC22A17, FGF18, MTSS1, ADCY1, L1CAM, MYLIP, IL15, FOXO4, CBX8, TLR7, AMOTL2, MAGED1, TRAK1, GAB1, FAS, OGT, MAP2K6, RAB27A, MTUS2, TWF2, KCND1, PLXNB1, MED12, HMG20A, SIX5, HES6, HDAC11, MAGEE1, PYGO1, ADAMTS1, PIAS1, SLITRK5, FGFR2, GNAI2, CACNB2, CACNB3, ABCA1, RIMS2, EPHB3, SOX9, KCNJ2, CDC42EP2, PPP1R3C, LAMB2, ADRA2A, RNF167, BMF, EMD, DIXDC1, BMP3, SMAD9, SMAD6, LMCD1, GAS1, KLF15, …

## Sheet: Fig5A_4hr_DEgenes_DAVIDbp
4 hr FGF up	Count	%	Pvalue	Genes
GO:0042127~regulation of cell proliferation	36	9.54907	9.29806e-06	CAV2, CCL2, PTGS2, LRRC32, PTGS1, SFN, IL34, IL11, SLFN2, LIF, SPRY2, SPRY1, BDNF, S1PR1, SERPINE1, TGFA, MYC, ETV4, PRKCA, GTPBP4, FLT4, KLF10, SPHK1, MYCN, PLA2G4A, EREG, JUN, FOXG1, TGIF1, HBEGF, NGFR, RBPJ, PLAU, KCTD11, F2R, HTR2A
GO:0051174~regulation of phosphorus metabolic process	22	5.83554	0.000676526	PRKCA, BCL10, GTPBP4, VAV3, MAP2K3, SPHK1, RCAN1, BDKRB2, SFN, IL34, SPRY4, IL11, TRIB1, LIF, SPRY2, SPRY1, EREG, JUN, TGFA, SPRED1, F2R, HTR2A
GO:0006793~phosphorus metabolic process	42	11.1406	0.000705516	CDK17, CDK18, NUAK2, DUSP10, HK2, PRKG2, RIOK2, TRIB1, LIF, MAP3K6, STK40, TGFA, SYNJ2, DYRK3, TEC, PRKCA, SGK1, PTPRE, ROCK2, MAP2K3, FLT4, PDK4, MYLK2, PTPN13, PIM3, DAPK2, EPHA2, PTPN12, DUSP5, DUSP4, MAST4, CCND1, PLK3, PLK2, DUSP1, PPM1J, MTMR10, MERTK, ABL2, DUSP6, F2R, CAMK1D
GO:0001568~blood vessel development	20	5.30504	0.000821293	NRP1, TNFRSF12A, SPHK1, TIPARP, CX3CL1, ELK3, ITGA4, JUNB, EPHA2, ARHGAP22, S1PR1, EREG, CTGF, HBEGF, TGFA, RBPJ, PPAP2B, TNFAIP2, RASA1, CYR61
4 hr FGF up	Count	%	PValue	Genes
GO:0060348~bone development	10	3.32226	0.000105834	MEF2C, HDAC5, FGFR2, FGF18, BMP3, KAZALD1, FOXC1, MYOG, SOX9, GLI2
GO:0007167~enzyme linked receptor protein signaling pathway	15	4.98339	0.000115526	FGFR2, TXNIP, FGF18, SMAD9, SMAD6, FOXO4, EPHB3, PHIP, ACVR2B, GAB1, FOXC1, JAK3, PIK3R3, FIGF, GFRA2
GO:0006357~regulation of transcription from RNA polymerase II promoter	24	7.97342	0.000117446	MEF2C, TXNIP, BMP3, FOXL2, MED12, LMCD1, ELK1, NFIX, HES6, GLI2, SOX9, MAGED1, HDAC5, ID2, TCEA3, TRAK1, POU3F3, FOXC1, MYOG, ID3, JAK3, TBL1X, APBB1, ALX1
GO:0001501~skeletal system development	15	4.98339	0.000179803	MEF2C, FGFR2, BMP3, FGF18, HEXA, GAS1, SOX9, GLI2, HDAC5, ACVR2B, KAZALD1, MYOG, FOXC1, WNT9A, ALX1
GO:0016055~Wnt receptor signaling pathway	10	3.32226	0.000221375	DIXDC1, WNT16, NKD1, DACT1, RSPO3, RSPO2, PYGO1, TLE2, FZD2, WNT9A
GO:0001503~ossification	10	2.99003	0.000275502	MEF2C, HDAC5, FGFR2, FGF18, BMP3, ID3, KAZALD1, FOXC1, MYOG, GLI2

## Sheet: Fig5B_4hrPDGFup_MGIphenotypes
4 hr PDGF MGI	P-value	Adjusted P-value	Z-score	Combined Score	Genes
MP0002116_abnormal_craniofacial_bone_	5.77e-07	9.92e-05	-2.0765	19.1422	L1CAM;MED12;KCNJ2;GAS1;HYAL2;FOXC1;WNT9A;NKD1;HEXA;RSPO2;RGMA;FIGN;LPAR4;GLI2;FGF18;FGFR2;SOX9;ALX1;NFIX;POU3F4;POU3F3
MP0002114_abnormal_axial_skeleton_	3.58e-05	0.00205261	-1.82533	11.2963	MEF2C;CRYAB;MED12;GAS1;HYAL2;FOXC1;WNT9A;HEXA;GLI2;DACT1;FAT4;NSDHL;FGF18;FGFR2;SOX9;ALX1;INHA;ACVR2B;NFIX;MYOG
MP0001340_abnormal_eyelid_morphology_	0.000222	0.0050983	-1.74881	9.23171	GAB1;GAS1;ARTN;FOXC1;GFRA2;FGFR2;ALX1;NFIX;FIGN;FOXL2
MP0003935_abnormal_craniofacial_develop_	0.000191	0.00469651	-1.6787	8.99942	MEF2C;GAB1;MED12;CACNB2;KCNJ2;GLI2;FOXC1;FGF18;FGFR2;SOX9;RSPO2;ALX1
MP0002135_abnormal_kidney_morphology_	0.000187	0.00469651	-1.66109	8.905	MEF2C;FAS;ADAMTS1;HYAL2;FOXC1;MTSS1;ABCA1;HDAC5;OSR1;RSPO2;ID2;LAMB2;DACT1;GADD45B;FAT4;PLXNB1;FGFR2;ACVR2B;POU3F3
MP0003755_abnormal_palate_morphology_	0.000453	0.00819663	-1.68548	8.09711	GAB1;KCNJ2;GLI2;FZD2;FGF18;FGFR2;SOX9;RSPO2;ALX1;FIGN
MP0001119_abnormal_female_reproductive_	0.000341	0.00651684	-1.56025	7.85329	FAS;ADAMTS1;DACT1;FOXC1;PTX3;IL15;ABCA1;BMF;OSR1;RSPO2;LOXL1;INHA;FOXL2
MP0000266_abnormal_heart_morphology_	0.000176	0.00469651	-1.39704	7.48946	MEF2C;MED12;CACNB2;CACNB3;GAS1;FOXC1;ABCA1;ADRA2A;HDAC5;OSR1;LPAR4;PHIP;NSDHL;FGFR2;TXNIP;FAS;GNAI2;PPP1R3C;KDM5C;GAB1;SMAD6;FZD2;SOX9;ACVR2B
MP0002152_abnormal_brain_morphology_	0.000166	0.00469651	-1.2356	6.62397	RAB27A;MED12;CACNB2;CACNB3;GAS1;FOXC1;ABCA1;RGMA;FIGN;GLI2;SEMA3F;NSDHL;GDI1;APBB1;PLXNA3;PYGO1;FGFR2;ALX1;L1CAM;CRYAB;MAOA;KDM6A;HEXA;SHISA2;ADCY1;SMAD9;SLITRK5;PEG3;NFIX;POU3F3
MP0001790_abnormal_immune_system_	0.0013222	0.0191398	-1.64022	6.4887	IL15;FAS;GNAI2;SLC7A2;TBXA2R;ID2;JAK3
MP0005387_immune_system_phenotype_	0.0013222	0.0191398	-1.64022	6.4887	IL15;FAS;GNAI2;SLC7A2;TBXA2R;ID2;JAK3
MP0009250_abnormal_appendicular_skeleto_	0.00142812	0.019651	-1.6133	6.33967	ALX1;DACT1;FOXC1;FGFR2;SOX9;FIGN
MP0002128_abnormal_blood_circulation_	0.000639	0.0109954	-1.39043	6.27124	CACNB2;FOXC1;ABCA1;HDAC5;OSR1;RSPO2;LPAR4;GAB1;SMAD6;NOTCH3;DACT1;NSDHL;SLITRK5;SOX9;INHA
MP0010768_mortality/aging_	0.000186	0.00469651	-1.14267	6.12576	MEF2C;OGT;PMP22;GAS1;HYAL2;ABCA1;FIGN;ID2;GLI2;DACT1;PHIP;NSDHL;APBB1;FGFR2;FOXL2;L1CAM;PTPRV;ADAMTS1;GNAI2;CAPN5;RPL29;SHISA2;LAMB2;SMAD6;FGF18;SOX9;INHA;ACVR2B;NFIX;POU3F3;MYOG
MP0002249_abnormal_larynx_morphology_	0.00133533	0.0191398	-1.5477	6.12266	SOX9;RSPO2;MYOG;FOXC1
MP0002882_abnormal_neuron_morphology_	0.000144	0.00469651	-1.13369	6.07763	PMP22;CACNB2;CACNB3;GAS1;FOXC1;ID2;RBP1;EPHB3;GLI2;GPX1;SEMA3F;ARTN;DACT1;GDI1;APBB1;PLXNA3;FGFR2;L1CAM;MAOA;GFRA2;HEXA;TRAK1;LAMB2;FAT4;FZD2;SLITRK5;NCKIPSD
MP0002115_abnormal_skeleton_extremities_	0.00268206	0.0307543	-1.72573	6.0085	MEF2C;GAS1;FOXC1;WNT9A;HEXA;RSPO2;FIGN;GLI2;FGF18;FGFR2;SOX9;ALX1;NFIX
MP0010770_preweaning_lethality_	0.000316	0.00639123	-1.16398	5.88141	MEF2C;OGT;PMP22;GAS1;HYAL2;ABCA1;FIGN;ID2;LPAR4;GLI2;PHIP;NSDHL;APBB1;FGFR2;FOXL2;L1CAM;PTPRV;ADAMTS1;GNAI2;CAPN5;RPL29;SHISA2;SMAD6;FGF18;SOX9;ACVR2B;POU3F3;MYOG
MP0000477_abnormal_intestine_morphology_	0.00167942	0.021397	-1.4619	5.62027	GNAI2;GPX1;DACT1;GFRA2;FGFR2;LOXL1;NFIX;TXNIP;TOX;ID2;JAK3
MP0000778_abnormal_nervous_system_	0.00208703	0.0256407	-1.40225	5.13723	L1CAM;FGFR2;CACNB3;SEMA3F;FOXC1;NFIX;APBB1
