# Supplementary material for: Receptor tyrosine kinases modulate distinct transcriptional programs by differential usage of intracellular pathways
Source: eLife. 2015 May 7;4:e07186. doi: 10.7554/eLife.07186 (PMC4450512; doi:10.7554/eLife.07186)
Supplement: Supplementary file 5. — PCR primers and in situ hybridization probes. DOI: http://dx.doi.org/10.7554/eLife.07186.018 [file elife07186s005.xlsx]

## Sheet: Sheet1
qPCR	Forward primer (5' to 3')	Reverse primer (5' to 3')
Fos	CGGGTTTCAACGCCGACTA	TGGCACTAGAGACGGACAGAT
Fosb	CCTCCGCCGAGTCTCAGTA	CCTGGCATGTCATAAGGGTCA
Jun	TGTGCCCCAAGAACGTGAC	CCGGGTTGAAGTTGCTGAG
Junb	CTATCGGGGTCTCAAGGGTC	CTGTTGGGGACGATCAAGC
Id1	TACGACATGAACGGCTGCTACTCA	TTACATGCTGCAGGATCTCCACCT
Id2	ATGAAAGCCTTCAGTCCGGTG	AGCAGACTCATCGGGTCGT
Id3	TCAGCTTAGCCAGGTGGAAATCCT	TGGAGATCACAAGTTCCGGAGTGA
Atoh8	TGGAAGACTGTGTGCGTTAAAG	TCCAAGTCCAATCGGAAAGTTTT
In situ probe	Template	Accession
Pdgfra	123-1766	NM_011058
Id1	114-553	NM_010495
Id3	63-421	NM_008321
Fgfr1	35-919	NM_010206
Dusp6	605-1671	NM_026268
Dusp1	2204-2820	NM_013642
Dusp10	40099-40904	NM_022019
